# Supplementary material for: Multiple reports on the causal relationship between various chronic pain and gut microbiota: a two-sample Mendelian randomization study
Source: Front Neurosci. 2024 Apr 17;18:1369996. doi: 10.3389/fnins.2024.1369996 (PMC11061420; doi:10.3389/fnins.2024.1369996)
Supplement: Supplementary file 2 [file Data_Sheet_2.xlsx]

## Sheet: catalogue
catalogue
Supplementary Table 1. Data Sources
Supplementary Table 2. Casual effects of MR analysis between gut microbiota and pain (locus-wide significance, p<1.00E-05)
Supplementary Table 3. Casual effects of MR analysis between gut metabolites and pain (IVW , p<0.05)
Supplementary Table 4. Heterogeneity tests between gut microbiota and pain
Supplementary Table 5. Heterogeneity tests between gut metabolites and pain
Supplemental Table 6. Instruments for gut microbiota(IVW , p<0.05)
Supplementary Table 7. Instruments for gut metabolites(IVW , p<0.05)
Supplementary table 8. Casual effects of MR Analysis between gut microbiota and headache（FDR）
Supplementary table 9. Casual effects of MR Analysis between gut microbiota and Ocular pain（FDR）
Supplementary table 10. Casual effects of MR Analysis between gut microbiota and facial pain（FDR）
Supplementary table 11. Casual effects of MR Analysis between gut microbiota and neck or shoulder pain（FDR）
Supplementary table 12. Casual effects of MR Analysis between gut microbiota and back pain（FDR）
Supplementary table 13. Casual effects of MR Analysis between gut microbiota and knee pain（FDR）
Supplementary table 14. Casual effects of MR Analysis between gut microbiota and hip pain（FDR）
Supplementary table 15. Casual effects of MR Analysis between gut microbiota and joint pain（FDR）
Supplementary table 16. Casual effects of MR Analysis between gut microbiota and limb pain（FDR）
Supplementary table 17. Casual effects of MR Analysis between gut microbiota and Fibromyalgia（FDR）
Supplementary table 18. Casual effects of MR Analysis between gut microbiota and Pain in thoracic spine（FDR）
Supplementary table 19. Casual effects of MR Analysis between gut microbiota and Pain (limb, back, neck, head abdominally)（FDR）

## Sheet: ST1
Supplementary Table 1. Data Sources
Phenotype	Consortium（PMID）	Sample Size	Population	Data Sources
Pain at 12 specific sites
(1)headache
Cluster headache, strict, including avohilmo	FinnGen Biobank	392423	European	https://storage.googleapis.com/finngen-public-data-r9/summary_stats/finngen_R9_G6_CLUSTHEADACHE_STRICT_INCLAVO.gz
Migraine	FinnGen Biobank	287837	European	https://storage.googleapis.com/finngen-public-data-r9/summary_stats/finngen_R9_G6_MIGRAINE.gz
(2)Ocular pain
Ocular pain	FinnGen Biobank	373254	European	https://storage.googleapis.com/finngen-public-data-r9/summary_stats/finngen_R9_H7_OCUPAIN.gz
(3)facial pain
Facial pains for 3+ months	UK Biobank( Neale lab)	6510	European	ukb-d-4067: Facial pains for 3+ months
Atypical facial pain	FinnGen Biobank	392423	European	https://storage.googleapis.com/finngen-public-data-r9/summary_stats/finngen_R9_G6_ATYFAC.gz
(4)neck or shoulder pain
Neck/shoulder pain for 3+ months	UK Biobank( Neale lab)		European	ukb-b-16118: Neck/shoulder pain for 3+ months
(5)back pain
Low back pain	FinnGen Biobank	473681	European	https://storage.googleapis.com/finngen-public-data-r9/summary_stats/finngen_R9_M13_LOWBACKPAIN.gz
Lower back pain or/and sciatica	FinnGen Biobank	321302	European	https://storage.googleapis.com/finngen-public-data-r9/summary_stats/finngen_R9_M13_LOWBACKPAINORANDSCIATICA.gz
(6)knee pain
Knee pain for 3+ months	UK Biobank( Neale lab)	97889	European	ukb-b-8906: Knee pain for 3+ months
(7)hip pain
Hip pain for 3+ months	UK Biobank( Neale lab)	51516	European	ukb-b-133: Hip pain for 3+ months
(9)joint pain
Pain in joint	FinnGen Biobank	356077	European	https://storage.googleapis.com/finngen-public-data-r9/summary_stats/finngen_R9_JOINTPAIN.gz
(8)limb pain
Pain in limb	FinnGen Biobank	15780	European	https://storage.googleapis.com/finngen-public-data-r9/summary_stats/finngen_R9_M13_LIMBPAIN.gz
(10)Fibromyalgia
Fibromyalgia	FinnGen Biobank	392423	European	https://storage.googleapis.com/finngen-public-data-r9/summary_stats/finngen_R9_M13_FIBROMYALGIA.gz
(11)Pain in thoracic spine
Pain in thoracic spine	FinnGen Biobank	356077	European	https://storage.googleapis.com/finngen-public-data-r9/summary_stats/finngen_R9_M13_THORACISPINEPAIN.gz
(12)Pain (limb, back, neck, head abdominally)
Pain (limb, back, neck, head abdominally)	FinnGen Biobank	321302	European	https://storage.googleapis.com/finngen-public-data-r9/summary_stats/finngen_R9_PAIN.gz
Gut microbiota
211 taxa (131 genera, 35 families, 20 orders, 16 classes, and 9 phyla)	MiBioGen	18340	European	https://mibiogen.gcc.rug.nl/menu/main/home/
Gut microbial metabolites
3-hydroxybutyrate(BHBA)	PMID：24816252	7820	European	https://gwas.mrcieu.ac.uk/datasets/met-a-311/
Tryptophan	PMID：24816252	7804	European	https://gwas.mrcieu.ac.uk/datasets/met-a-304/
Tyrosine	PMID：24816252	114911	European	https://gwas.mrcieu.ac.uk/datasets/met-d-Tyr/
Phenylalanine	NA	115025	European	https://gwas.mrcieu.ac.uk/datasets/met-d-Phe/
Glutamate	PMID：24816252	7804	European	https://gwas.mrcieu.ac.uk/datasets/met-a-466/
Glycine	NA	114972	European	https://gwas.mrcieu.ac.uk/datasets/met-d-Gly/
propionic acid	NA	822	European	GWAS Catalog (ebi.ac.uk)
Trimethylamino oxide（TMAO）	PMID: 23823483	2076	European	https://doi.org/10.1016/j.cmet.2013.06.013
Serotonin (5HT)	PMID: 24816252	6139	European	Trait: Serotonin (5HT) - IEU OpenGWAS project (mrcieu.ac.uk)

## Sheet: ST2
Supplementary Table 2. Casual effects of MR analysis between gut microbiota and pain (IVW , p<0.05)
	Exposure	Outcome	Method	nsnp	OR (95%CI)	p-value
(1)headache	family.ClostridialesvadinBB60gr	Cluster headache, strict, including avohilmo	MR Egger	17	1.08733	0.849628
	family.ClostridialesvadinBB60gr	Cluster headache, strict, including avohilmo	Weighted median	17	0.717058	0.135366
	family.ClostridialesvadinBB60gr	Cluster headache, strict, including avohilmo	Inverse variance weighted	17	0.717888	0.0320685
	order.Burkholderiales.id.2874.	Cluster headache, strict, including avohilmo	MR Egger	12	1.66955	0.488031
	order.Burkholderiales.id.2874.	Cluster headache, strict, including avohilmo	Weighted median	12	0.663178	0.196587
	order.Burkholderiales.id.2874.	Cluster headache, strict, including avohilmo	Inverse variance weighted	12	0.558794	0.0122257
	phylum.Actinobacteria.id.400.	Cluster headache, strict, including avohilmo	MR Egger	16	4.14063	0.143355
	phylum.Actinobacteria.id.400.	Cluster headache, strict, including avohilmo	Weighted median	16	1.85203	0.0336127
	phylum.Actinobacteria.id.400.	Cluster headache, strict, including avohilmo	Inverse variance weighted	16	1.64276	0.0173169
	class.Betaproteobacteria.id.286.	Cluster headache, strict, including avohilmo	MR Egger	13	1.3881	0.653455
	class.Betaproteobacteria.id.286.	Cluster headache, strict, including avohilmo	Weighted median	13	0.675516	0.191703
	class.Betaproteobacteria.id.286.	Cluster headache, strict, including avohilmo	Inverse variance weighted	13	0.588345	0.0184743
	genus.Coprococcus1.id.11301.	Cluster headache, strict, including avohilmo	MR Egger	14	0.53585	0.293505
	genus.Coprococcus1.id.11301.	Cluster headache, strict, including avohilmo	Weighted median	14	0.543158	0.0437351
	genus.Coprococcus1.id.11301.	Cluster headache, strict, including avohilmo	Inverse variance weighted	14	0.588506	0.0109743
	family.Alcaligenaceae.id.2875.	Cluster headache, strict, including avohilmo	MR Egger	16	2.25161	0.38032
	family.Alcaligenaceae.id.2875.	Cluster headache, strict, including avohilmo	Weighted median	16	0.624417	0.106877
	family.Alcaligenaceae.id.2875.	Cluster headache, strict, including avohilmo	Inverse variance weighted	16	0.59673	0.0145818
	family.Bifidobacteriaceae.id.43.	Migraine	MR Egger	17	0.946816	0.754042
	family.Bifidobacteriaceae.id.43.	Migraine	Weighted median	17	0.804219	0.00126417
	family.Bifidobacteriaceae.id.43.	Migraine	Inverse variance weighted	17	0.823055	2.52969e-05
	genus.Oxalobacter.id.2978.	Migraine	MR Egger	12	1.04999	0.742644
	genus.Oxalobacter.id.2978.	Migraine	Weighted median	12	1.02769	0.504984
	genus.Oxalobacter.id.2978.	Migraine	Inverse variance weighted	12	1.06934	0.0324997
	genus.Victivallis.id.2256.	Migraine	MR Egger	12	1.37572	0.121204
	genus.Victivallis.id.2256.	Migraine	Weighted median	12	1.06433	0.0971268
	genus.Victivallis.id.2256.	Migraine	Inverse variance weighted	12	1.05984	0.0411186
	genus..Eubacteriumcoprostanolig.	Migraine	MR Egger	13	0.911227	0.700345
	genus..Eubacteriumcoprostanolig.	Migraine	Weighted median	13	0.867374	0.0846083
	genus..Eubacteriumcoprostanolig.	Migraine	Inverse variance weighted	13	0.851664	0.00855466
	genus..Eubacteriumrectalegroup..	Migraine	MR Egger	11	1.18192	0.327427
	genus..Eubacteriumrectalegroup..	Migraine	Weighted median	11	0.924356	0.347544
	genus..Eubacteriumrectalegroup..	Migraine	Inverse variance weighted	11	0.877394	0.0260941
	genus.Bifidobacterium.id.436.	Migraine	MR Egger	15	0.923503	0.628033
	genus.Bifidobacterium.id.436.	Migraine	Weighted median	15	0.908377	0.166213
	genus.Bifidobacterium.id.436.	Migraine	Inverse variance weighted	15	0.863507	0.0131493
(2)Ocular pain	genus.Intestinimonas.id.2062.	Ocular pain	MR Egger	19	1.31996	0.42122
	genus.Intestinimonas.id.2062.	Ocular pain	Weighted median	19	1.5116	0.010937
	genus.Intestinimonas.id.2062.	Ocular pain	Inverse variance weighted	19	1.33256	0.0138231
	genus.Oxalobacter.id.2978.	Ocular pain	MR Egger	12	0.478646	0.0839568
	genus.Oxalobacter.id.2978.	Ocular pain	Weighted median	12	0.849154	0.158817
	genus.Oxalobacter.id.2978.	Ocular pain	Inverse variance weighted	12	0.814663	0.0188183
	genus.RuminococcaceaeUCG014.id..	Ocular pain	MR Egger	16	1.84016	0.0782661
	genus.RuminococcaceaeUCG014.id..	Ocular pain	Weighted median	16	1.32398	0.135635
	genus.RuminococcaceaeUCG014.id..	Ocular pain	Inverse variance weighted	16	1.35496	0.0155878
	order.Bacillales.id.1674.	Ocular pain	MR Egger	9	0.905131	0.79306
	order.Bacillales.id.1674.	Ocular pain	Weighted median	9	1.26516	0.0514386
	order.Bacillales.id.1674.	Ocular pain	Inverse variance weighted	9	1.2178	0.0244449
	order.Clostridiales.id.1863.	Ocular pain	MR Egger	14	0.6962	0.634544
	order.Clostridiales.id.1863.	Ocular pain	Weighted median	14	0.694447	0.1264
	order.Clostridiales.id.1863.	Ocular pain	Inverse variance weighted	14	0.701125	0.0479784
	class.Clostridia.id.1859.	Ocular pain	MR Egger	15	0.60955	0.519646
	class.Clostridia.id.1859.	Ocular pain	Weighted median	15	0.68274	0.0966092
	class.Clostridia.id.1859.	Ocular pain	Inverse variance weighted	15	0.702191	0.0486215
(3)facial pain	genus.Phascolarctobacterium.id..	Atypical facial pain	MR Egger	10	0.440955	0.306366
	genus.Phascolarctobacterium.id..	Atypical facial pain	Weighted median	10	0.77068	0.277848
	genus.Phascolarctobacterium.id..	Atypical facial pain	Inverse variance weighted	10	0.590408	0.00622804
	genus.RuminococcaceaeUCG005.id..	Atypical facial pain	MR Egger	17	1.74591	0.229093
	genus.RuminococcaceaeUCG005.id..	Atypical facial pain	Weighted median	17	1.34665	0.187825
	genus.RuminococcaceaeUCG005.id..	Atypical facial pain	Inverse variance weighted	17	1.43488	0.0246214
	phylum.Bacteroidetes.id.905.	Atypical facial pain	MR Egger	12	0.877524	0.806387
	phylum.Bacteroidetes.id.905.	Atypical facial pain	Weighted median	12	1.58681	0.143534
	phylum.Bacteroidetes.id.905.	Atypical facial pain	Inverse variance weighted	12	1.60569	0.0291047
	familyfamily.id.1000006.	Atypical facial pain	MR Egger	15	1.09622	0.846065
	familyfamily.id.1000006.	Atypical facial pain	Weighted median	15	0.752188	0.0542402
	familyfamily.id.1000006.	Atypical facial pain	Inverse variance weighted	15	0.778988	0.0175035
	genus.Anaerofilum.id.2053.	Atypical facial pain	MR Egger	11	0.866105	0.806354
	genus.Anaerofilum.id.2053.	Atypical facial pain	Weighted median	11	1.19471	0.313491
	genus.Anaerofilum.id.2053.	Atypical facial pain	Inverse variance weighted	11	1.28971	0.040713
	genus.Odoribacter.id.952	Facial pains for 3+ months || id:ukb-d-4067	MR Egger	9	1.10682	0.624953
	genus.Odoribacter.id.952	Facial pains for 3+ months || id:ukb-d-4067	Weighted median	9	1.04339	0.560782
	genus.Odoribacter.id.952	Facial pains for 3+ months || id:ukb-d-4067	Inverse variance weighted	9	1.12869	0.0252132
	genus.Oxalobacter.id.2978	Facial pains for 3+ months || id:ukb-d-4067	MR Egger	12	1.0611	0.592915
	genus.Oxalobacter.id.2978	Facial pains for 3+ months || id:ukb-d-4067	Weighted median	12	0.963034	0.235526
	genus.Oxalobacter.id.2978	Facial pains for 3+ months || id:ukb-d-4067	Inverse variance weighted	12	0.950875	0.0445983
	genus.RuminococcaceaeUCG003.id.	Facial pains for 3+ months || id:ukb-d-4067	MR Egger	14	0.861125	0.319059
	genus.RuminococcaceaeUCG003.id.	Facial pains for 3+ months || id:ukb-d-4067	Weighted median	14	0.914607	0.132066
	genus.RuminococcaceaeUCG003.id.	Facial pains for 3+ months || id:ukb-d-4067	Inverse variance weighted	14	0.900955	0.0124403
	genus.Tyzzerella3.id.11335	Facial pains for 3+ months || id:ukb-d-4067	MR Egger	13	1.12903	0.471704
	genus.Tyzzerella3.id.11335	Facial pains for 3+ months || id:ukb-d-4067	Weighted median	13	1.05435	0.133718
	genus.Tyzzerella3.id.11335	Facial pains for 3+ months || id:ukb-d-4067	Inverse variance weighted	13	1.07417	0.00514232
	order.Erysipelotrichales.id.214	Facial pains for 3+ months || id:ukb-d-4067	MR Egger	13	0.913212	0.671287
	order.Erysipelotrichales.id.214	Facial pains for 3+ months || id:ukb-d-4067	Weighted median	13	1.0757	0.272696
	order.Erysipelotrichales.id.214	Facial pains for 3+ months || id:ukb-d-4067	Inverse variance weighted	13	1.10795	0.0363971
	family.Erysipelotrichaceae.id.2	Facial pains for 3+ months || id:ukb-d-4067	MR Egger	13	0.913212	0.671287
	family.Erysipelotrichaceae.id.2	Facial pains for 3+ months || id:ukb-d-4067	Weighted median	13	1.0757	0.274842
	family.Erysipelotrichaceae.id.2	Facial pains for 3+ months || id:ukb-d-4067	Inverse variance weighted	13	1.10795	0.0363971
	phylum.Verrucomicrobia.id.3982	Facial pains for 3+ months || id:ukb-d-4067	MR Egger	12	0.998486	0.989504
	phylum.Verrucomicrobia.id.3982	Facial pains for 3+ months || id:ukb-d-4067	Weighted median	12	0.924324	0.157105
	phylum.Verrucomicrobia.id.3982	Facial pains for 3+ months || id:ukb-d-4067	Inverse variance weighted	12	0.913591	0.0248071
	class.Erysipelotrichia.id.2147	Facial pains for 3+ months || id:ukb-d-4067	MR Egger	13	0.913212	0.671287
	class.Erysipelotrichia.id.2147	Facial pains for 3+ months || id:ukb-d-4067	Weighted median	13	1.0757	0.285093
	class.Erysipelotrichia.id.2147	Facial pains for 3+ months || id:ukb-d-4067	Inverse variance weighted	13	1.10795	0.0363971
	genus.Butyricicoccus.id.2055	Facial pains for 3+ months || id:ukb-d-4067	MR Egger	9	1.10024	0.292721
	genus.Butyricicoccus.id.2055	Facial pains for 3+ months || id:ukb-d-4067	Weighted median	9	1.1178	0.0751353
	genus.Butyricicoccus.id.2055	Facial pains for 3+ months || id:ukb-d-4067	Inverse variance weighted	9	1.12657	0.00820772
(4)neck or shoulder pain	genus.LachnospiraceaeUCG010.id.	Neck/shoulder pain for 3+ months || id:ukb-b-16118	MR Egger	12	0.951567	0.0854377
	genus.LachnospiraceaeUCG010.id.	Neck/shoulder pain for 3+ months || id:ukb-b-16118	Weighted median	12	0.980247	0.126128
	genus.LachnospiraceaeUCG010.id.	Neck/shoulder pain for 3+ months || id:ukb-b-16118	Inverse variance weighted	12	0.976455	0.0115484
	genus.Methanobrevibacter.id.123	Neck/shoulder pain for 3+ months || id:ukb-b-16118	MR Egger	8	1.04071	0.169912
	genus.Methanobrevibacter.id.123	Neck/shoulder pain for 3+ months || id:ukb-b-16118	Weighted median	8	1.01448	0.0994339
	genus.Methanobrevibacter.id.123	Neck/shoulder pain for 3+ months || id:ukb-b-16118	Inverse variance weighted	8	1.01551	0.0227007
	order.Gastranaerophilales.id.15	Neck/shoulder pain for 3+ months || id:ukb-b-16118	MR Egger	12	1.0395	0.0719315
	order.Gastranaerophilales.id.15	Neck/shoulder pain for 3+ months || id:ukb-b-16118	Weighted median	12	1.01435	0.0906541
	order.Gastranaerophilales.id.15	Neck/shoulder pain for 3+ months || id:ukb-b-16118	Inverse variance weighted	12	1.01585	0.0151471
	class.Melainabacteria.id.1589	Neck/shoulder pain for 3+ months || id:ukb-b-16118	MR Egger	13	1.04149	0.0519462
	class.Melainabacteria.id.1589	Neck/shoulder pain for 3+ months || id:ukb-b-16118	Weighted median	13	1.01446	0.0821711
	class.Melainabacteria.id.1589	Neck/shoulder pain for 3+ months || id:ukb-b-16118	Inverse variance weighted	13	1.0144	0.022161
	family.Rhodospirillaceae.id.271	Neck/shoulder pain for 3+ months || id:ukb-b-16118	MR Egger	17	1.0088	0.823735
	family.Rhodospirillaceae.id.271	Neck/shoulder pain for 3+ months || id:ukb-b-16118	Weighted median	17	1.01054	0.291713
	family.Rhodospirillaceae.id.271	Neck/shoulder pain for 3+ months || id:ukb-b-16118	Inverse variance weighted	17	1.0166	0.0410767
	genus..Eubacteriumnodatumgroup.	Neck/shoulder pain for 3+ months || id:ukb-b-16118	MR Egger	11	1.02674	0.283887
	genus..Eubacteriumnodatumgroup.	Neck/shoulder pain for 3+ months || id:ukb-b-16118	Weighted median	11	1.01304	0.0630423
	genus..Eubacteriumnodatumgroup.	Neck/shoulder pain for 3+ months || id:ukb-b-16118	Inverse variance weighted	11	1.01183	0.0255717
	genus.Faecalibacterium.id.2057	Neck/shoulder pain for 3+ months || id:ukb-b-16118	MR Egger	13	1.01655	0.414812
	genus.Faecalibacterium.id.2057	Neck/shoulder pain for 3+ months || id:ukb-b-16118	Weighted median	13	0.984925	0.245294
	genus.Faecalibacterium.id.2057	Neck/shoulder pain for 3+ months || id:ukb-b-16118	Inverse variance weighted	13	0.980066	0.0306926
(5)back pain	genus.Olsenella.id.822	back pain	MR Egger	10	0.842616	0.0798278
	genus.Olsenella.id.822	back pain	Weighted median	10	0.93303	0.0594337
	genus.Olsenella.id.822	back pain	Inverse variance weighted	10	0.921463	0.0024715
	genus.Oxalobacter.id.2978	back pain	MR Egger	12	1.04692	0.682937
	genus.Oxalobacter.id.2978	back pain	Weighted median	12	1.09084	0.00867918
	genus.Oxalobacter.id.2978	back pain	Inverse variance weighted	12	1.09625	0.000206844
	genus.Roseburia.id.2012	back pain	MR Egger	17	0.910785	0.464419
	genus.Roseburia.id.2012	back pain	Weighted median	17	0.926958	0.214246
	genus.Roseburia.id.2012	back pain	Inverse variance weighted	17	0.899808	0.0120505
	genus.RuminococcaceaeUCG011.id.	back pain	MR Egger	8	1.19784	0.238579
	genus.RuminococcaceaeUCG011.id.	back pain	Weighted median	8	0.941458	0.126503
	genus.RuminococcaceaeUCG011.id.	back pain	Inverse variance weighted	8	0.917392	0.00855841
	familyfamilyXIII.id.1957	back pain	MR Egger	10	1.25148	0.370973
	familyfamilyXIII.id.1957	back pain	Weighted median	10	0.886131	0.0829857
	familyfamilyXIII.id.1957	back pain	Inverse variance weighted	10	0.893057	0.0399502
	genus..Eubacteriumfissicatenagr	back pain	MR Egger	9	1.26336	0.292112
	genus..Eubacteriumfissicatenagr	back pain	Weighted median	9	1.06831	0.125117
	genus..Eubacteriumfissicatenagr	back pain	Inverse variance weighted	9	1.09071	0.023944
	genus..Eubacteriumrectalegroup.	back pain	MR Egger	11	0.96823	0.831789
	genus..Eubacteriumrectalegroup.	back pain	Weighted median	11	0.896587	0.116016
	genus..Eubacteriumrectalegroup.	back pain	Inverse variance weighted	11	0.876066	0.0116996
	genus.Collinsella.id.815	back pain	MR Egger	12	0.945297	0.787809
	genus.Collinsella.id.815	back pain	Weighted median	12	0.893131	0.0762088
	genus.Collinsella.id.815	back pain	Inverse variance weighted	12	0.884865	0.0133692
	genus.Olsenella.id.822	Lower back pain or/and sciatica	MR Egger	10	0.9102	0.28938
	genus.Olsenella.id.822	Lower back pain or/and sciatica	Weighted median	10	0.943794	0.0564967
	genus.Olsenella.id.822	Lower back pain or/and sciatica	Inverse variance weighted	10	0.932367	0.00437544
	genus.Oxalobacter.id.2978	Lower back pain or/and sciatica	MR Egger	12	1.0325	0.735239
	genus.Oxalobacter.id.2978	Lower back pain or/and sciatica	Weighted median	12	1.05583	0.0543189
	genus.Oxalobacter.id.2978	Lower back pain or/and sciatica	Inverse variance weighted	12	1.06576	0.00229988
	genus.Ruminiclostridium6.id.113	Lower back pain or/and sciatica	MR Egger	16	1.08842	0.323923
	genus.Ruminiclostridium6.id.113	Lower back pain or/and sciatica	Weighted median	16	1.06337	0.176916
	genus.Ruminiclostridium6.id.113	Lower back pain or/and sciatica	Inverse variance weighted	16	1.07343	0.0291359
	genus.RuminococcaceaeUCG005.id.	Lower back pain or/and sciatica	MR Egger	17	1.04398	0.621775
	genus.RuminococcaceaeUCG005.id.	Lower back pain or/and sciatica	Weighted median	17	1.07063	0.131805
	genus.RuminococcaceaeUCG005.id.	Lower back pain or/and sciatica	Inverse variance weighted	17	1.06288	0.0486166
	genus.RuminococcaceaeUCG011.id.	Lower back pain or/and sciatica	MR Egger	8	1.06537	0.599795
	genus.RuminococcaceaeUCG011.id.	Lower back pain or/and sciatica	Weighted median	8	0.965221	0.255616
	genus.RuminococcaceaeUCG011.id.	Lower back pain or/and sciatica	Inverse variance weighted	8	0.948611	0.0211031
	genus.Tyzzerella3.id.11335	Lower back pain or/and sciatica	MR Egger	13	1.06356	0.638397
	genus.Tyzzerella3.id.11335	Lower back pain or/and sciatica	Weighted median	13	1.05351	0.0836241
	genus.Tyzzerella3.id.11335	Lower back pain or/and sciatica	Inverse variance weighted	13	1.04739	0.0395758
	genusgenus.id.959	Lower back pain or/and sciatica	MR Egger	14	0.854206	0.259799
	genusgenus.id.959	Lower back pain or/and sciatica	Weighted median	14	0.970511	0.292492
	genusgenus.id.959	Lower back pain or/and sciatica	Inverse variance weighted	14	0.95181	0.0321223
	phylum.Firmicutes.id.1672	Lower back pain or/and sciatica	MR Egger	18	0.852555	0.101798
	phylum.Firmicutes.id.1672	Lower back pain or/and sciatica	Weighted median	18	0.91943	0.0740328
	phylum.Firmicutes.id.1672	Lower back pain or/and sciatica	Inverse variance weighted	18	0.924726	0.0184221
	family.Prevotellaceae.id.960	Lower back pain or/and sciatica	MR Egger	18	1.00071	0.995746
	family.Prevotellaceae.id.960	Lower back pain or/and sciatica	Weighted median	18	1.08031	0.090324
	family.Prevotellaceae.id.960	Lower back pain or/and sciatica	Inverse variance weighted	18	1.08483	0.0424545
	genus..Eubacteriumfissicatenagr	Lower back pain or/and sciatica	MR Egger	9	1.25905	0.146753
	genus..Eubacteriumfissicatenagr	Lower back pain or/and sciatica	Weighted median	9	1.0649	0.0636951
	genus..Eubacteriumfissicatenagr	Lower back pain or/and sciatica	Inverse variance weighted	9	1.0664	0.0215102
	genus.Collinsella.id.815	Lower back pain or/and sciatica	MR Egger	12	1.0721	0.693592
	genus.Collinsella.id.815	Lower back pain or/and sciatica	Weighted median	12	0.906517	0.0685462
	genus.Collinsella.id.815	Lower back pain or/and sciatica	Inverse variance weighted	12	0.889149	0.0048493
(6)knee pain	order.Rhodospirillales.id.2667	Knee pain for 3+ months || id:ukb-b-8906	MR Egger	15	1.01289	0.681616
	order.Rhodospirillales.id.2667	Knee pain for 3+ months || id:ukb-b-8906	Weighted median	15	1.0175	0.0648964
	order.Rhodospirillales.id.2667	Knee pain for 3+ months || id:ukb-b-8906	Inverse variance weighted	15	1.01849	0.00676275
	order.Selenomonadales.id.2165	Knee pain for 3+ months || id:ukb-b-8906	MR Egger	13	0.984971	0.64939
	order.Selenomonadales.id.2165	Knee pain for 3+ months || id:ukb-b-8906	Weighted median	13	1.0186	0.169764
	order.Selenomonadales.id.2165	Knee pain for 3+ months || id:ukb-b-8906	Inverse variance weighted	13	1.02454	0.0162105
	phylum.Proteobacteria.id.2375	Knee pain for 3+ months || id:ukb-b-8906	MR Egger	14	1.03587	0.278738
	phylum.Proteobacteria.id.2375	Knee pain for 3+ months || id:ukb-b-8906	Weighted median	14	1.01974	0.155909
	phylum.Proteobacteria.id.2375	Knee pain for 3+ months || id:ukb-b-8906	Inverse variance weighted	14	1.02	0.0464497
	family.Rhodospirillaceae.id.271	Knee pain for 3+ months || id:ukb-b-8906	MR Egger	17	1.03521	0.258921
	family.Rhodospirillaceae.id.271	Knee pain for 3+ months || id:ukb-b-8906	Weighted median	17	1.01712	0.0523714
	family.Rhodospirillaceae.id.271	Knee pain for 3+ months || id:ukb-b-8906	Inverse variance weighted	17	1.01319	0.0386203
	class.Negativicutes.id.2164	Knee pain for 3+ months || id:ukb-b-8906	MR Egger	13	0.984971	0.64939
	class.Negativicutes.id.2164	Knee pain for 3+ months || id:ukb-b-8906	Weighted median	13	1.0186	0.163305
	class.Negativicutes.id.2164	Knee pain for 3+ months || id:ukb-b-8906	Inverse variance weighted	13	1.02454	0.0162105
	genus.Anaerofilum.id.2053	Knee pain for 3+ months || id:ukb-b-8906	MR Egger	12	0.997219	0.914858
	genus.Anaerofilum.id.2053	Knee pain for 3+ months || id:ukb-b-8906	Weighted median	12	1.00751	0.326651
	genus.Anaerofilum.id.2053	Knee pain for 3+ months || id:ukb-b-8906	Inverse variance weighted	12	1.0129	0.0243766
(7)hip pain	class.Mollicutes.id.3920.	Hip pain for 3+ months || id:ukb-b-133	MR Egger	12	0.970772	0.451755
	class.Mollicutes.id.3920.	Hip pain for 3+ months || id:ukb-b-133	Weighted median	12	0.976887	0.118879
	class.Mollicutes.id.3920.	Hip pain for 3+ months || id:ukb-b-133	Inverse variance weighted	12	0.976472	0.0418586
	family.Porphyromonadaceae.id.94.	Hip pain for 3+ months || id:ukb-b-133	MR Egger	11	0.971808	0.694763
	family.Porphyromonadaceae.id.94.	Hip pain for 3+ months || id:ukb-b-133	Weighted median	11	1.03199	0.142713
	family.Porphyromonadaceae.id.94.	Hip pain for 3+ months || id:ukb-b-133	Inverse variance weighted	11	1.03558	0.0268791
	genus.Adlercreutzia.id.812.	Hip pain for 3+ months || id:ukb-b-133	MR Egger	12	1.01098	0.833154
	genus.Adlercreutzia.id.812.	Hip pain for 3+ months || id:ukb-b-133	Weighted median	12	1.02442	0.0756487
	genus.Adlercreutzia.id.812.	Hip pain for 3+ months || id:ukb-b-133	Inverse variance weighted	12	1.02872	0.00658142
	genus.Eisenbergiella.id.11304.	Hip pain for 3+ months || id:ukb-b-133	MR Egger	12	1.0201	0.777737
	genus.Eisenbergiella.id.11304.	Hip pain for 3+ months || id:ukb-b-133	Weighted median	12	0.98214	0.132511
	genus.Eisenbergiella.id.11304.	Hip pain for 3+ months || id:ukb-b-133	Inverse variance weighted	12	0.983076	0.0487204
	genus.Roseburia.id.2012.	Hip pain for 3+ months || id:ukb-b-133	MR Egger	17	1.04207	0.215127
	genus.Roseburia.id.2012.	Hip pain for 3+ months || id:ukb-b-133	Weighted median	17	1.02012	0.222989
	genus.Roseburia.id.2012.	Hip pain for 3+ months || id:ukb-b-133	Inverse variance weighted	17	1.03336	0.00537167
	order.Bacteroidales.id.913.	Hip pain for 3+ months || id:ukb-b-133	MR Egger	15	0.992456	0.79702
	order.Bacteroidales.id.913.	Hip pain for 3+ months || id:ukb-b-133	Weighted median	15	0.979287	0.261278
	order.Bacteroidales.id.913.	Hip pain for 3+ months || id:ukb-b-133	Inverse variance weighted	15	0.971793	0.0211842
	phylum.Tenericutes.id.3919.	Hip pain for 3+ months || id:ukb-b-133	MR Egger	12	0.970772	0.451755
	phylum.Tenericutes.id.3919.	Hip pain for 3+ months || id:ukb-b-133	Weighted median	12	0.976887	0.11446
	phylum.Tenericutes.id.3919.	Hip pain for 3+ months || id:ukb-b-133	Inverse variance weighted	12	0.976472	0.0418586
	class.Bacteroidia.id.912.	Hip pain for 3+ months || id:ukb-b-133	MR Egger	15	0.992456	0.79702
	class.Bacteroidia.id.912.	Hip pain for 3+ months || id:ukb-b-133	Weighted median	15	0.979287	0.241452
	class.Bacteroidia.id.912.	Hip pain for 3+ months || id:ukb-b-133	Inverse variance weighted	15	0.971793	0.0211842
(8)limb pain	genus.LachnospiraceaeND3007grou	limb pain	MR Egger	3	1.57639	0.827325
	genus.LachnospiraceaeND3007grou	limb pain	Weighted median	3	1.24305	0.0715388
	genus.LachnospiraceaeND3007grou	limb pain	Inverse variance weighted	3	1.23164	0.0318442
	genus.LachnospiraceaeNK4A136gro	limb pain	MR Egger	16	0.940575	0.418961
	genus.LachnospiraceaeNK4A136gro	limb pain	Weighted median	16	0.928997	0.16948
	genus.LachnospiraceaeNK4A136gro	limb pain	Inverse variance weighted	16	0.919349	0.0189801
	genus.RuminococcaceaeUCG003.id.	limb pain	MR Egger	14	1.09022	0.529439
	genus.RuminococcaceaeUCG003.id.	limb pain	Weighted median	14	0.904846	0.0695719
	genus.RuminococcaceaeUCG003.id.	limb pain	Inverse variance weighted	14	0.918523	0.0319786
	genus.Anaerotruncus.id.2054	limb pain	MR Egger	15	1.25383	0.105771
	genus.Anaerotruncus.id.2054	limb pain	Weighted median	15	1.12059	0.0516315
	genus.Anaerotruncus.id.2054	limb pain	Inverse variance weighted	15	1.09137	0.0421554
(9)joint pain	genus.Terrisporobacter.id.11348	joint pain	MR Egger	6	1.00701	0.96674
	genus.Terrisporobacter.id.11348	joint pain	Weighted median	6	0.916371	0.145616
	genus.Terrisporobacter.id.11348	joint pain	Inverse variance weighted	6	0.900912	0.0308675
	order.Selenomonadales.id.2165	joint pain	MR Egger	13	1.02094	0.910382
	order.Selenomonadales.id.2165	joint pain	Weighted median	13	1.04811	0.48635
	order.Selenomonadales.id.2165	joint pain	Inverse variance weighted	13	1.11167	0.0379791
	class.Negativicutes.id.2164	joint pain	MR Egger	13	1.02094	0.910382
	class.Negativicutes.id.2164	joint pain	Weighted median	13	1.04811	0.479838
	class.Negativicutes.id.2164	joint pain	Inverse variance weighted	13	1.11167	0.0379791
	genus..Eubacteriumoxidoreducens	joint pain	MR Egger	6	0.774372	0.220108
	genus..Eubacteriumoxidoreducens	joint pain	Weighted median	6	0.936932	0.249251
	genus..Eubacteriumoxidoreducens	joint pain	Inverse variance weighted	6	0.906204	0.0238647
	genus.Dialister.id.2183	joint pain	MR Egger	12	1.48171	0.0637999
	genus.Dialister.id.2183	joint pain	Weighted median	12	1.08345	0.203867
	genus.Dialister.id.2183	joint pain	Inverse variance weighted	12	1.1099	0.0187197
	family.Rhodospirillaceae.id.271	Fibromyalgia	MR Egger	16	1.22772	0.661461
	family.Rhodospirillaceae.id.271	Fibromyalgia	Weighted median	16	1.33154	0.0510614
	family.Rhodospirillaceae.id.271	Fibromyalgia	Inverse variance weighted	16	1.24781	0.0466219
	genus.Erysipelatoclostridium.id	Fibromyalgia	MR Egger	16	0.647475	0.469841
	genus.Erysipelatoclostridium.id	Fibromyalgia	Weighted median	16	0.863904	0.38305
	genus.Erysipelatoclostridium.id	Fibromyalgia	Inverse variance weighted	16	0.735367	0.0286766
(11)Pain in thoracic spine	genus.Lachnospira.id.2004	Pain in thoracic spine	MR Egger	7	0.667445	0.659414
	genus.Lachnospira.id.2004	Pain in thoracic spine	Weighted median	7	0.707298	0.0863005
	genus.Lachnospira.id.2004	Pain in thoracic spine	Inverse variance weighted	7	0.697608	0.0233207
	genus.Butyricimonas.id.945	Pain in thoracic spine	MR Egger	17	1.03398	0.920443
	genus.Butyricimonas.id.945	Pain in thoracic spine	Weighted median	17	1.14583	0.236835
	genus.Butyricimonas.id.945	Pain in thoracic spine	Inverse variance weighted	17	1.19261	0.0340369
（12）Pain (limb, back, neck, head abdominally)	genus.Olsenella.id.822	Pain (limb, back, neck, head abdominally)	MR Egger	10	0.915262	0.117416
	genus.Olsenella.id.822	Pain (limb, back, neck, head abdominally)	Weighted median	10	0.969808	0.110268
	genus.Olsenella.id.822	Pain (limb, back, neck, head abdominally)	Inverse variance weighted	10	0.965241	0.0263406
	genus.Oscillibacter.id.2063	Pain (limb, back, neck, head abdominally)	MR Egger	16	0.883563	0.0597971
	genus.Oscillibacter.id.2063	Pain (limb, back, neck, head abdominally)	Weighted median	16	0.963926	0.111497
	genus.Oscillibacter.id.2063	Pain (limb, back, neck, head abdominally)	Inverse variance weighted	16	0.962487	0.0324162
	order.Clostridiales.id.1863	Pain (limb, back, neck, head abdominally)	MR Egger	14	0.85914	0.15351
	order.Clostridiales.id.1863	Pain (limb, back, neck, head abdominally)	Weighted median	14	0.942139	0.0932138
	order.Clostridiales.id.1863	Pain (limb, back, neck, head abdominally)	Inverse variance weighted	14	0.921625	0.0011371
	order.Selenomonadales.id.2165	Pain (limb, back, neck, head abdominally)	MR Egger	13	1.15835	0.215954
	order.Selenomonadales.id.2165	Pain (limb, back, neck, head abdominally)	Weighted median	13	1.05836	0.131661
	order.Selenomonadales.id.2165	Pain (limb, back, neck, head abdominally)	Inverse variance weighted	13	1.08154	0.0115394
	order.Verrucomicrobiales.id.403	Pain (limb, back, neck, head abdominally)	MR Egger	12	1.015	0.882845
	order.Verrucomicrobiales.id.403	Pain (limb, back, neck, head abdominally)	Weighted median	12	0.9572	0.165711
	order.Verrucomicrobiales.id.403	Pain (limb, back, neck, head abdominally)	Inverse variance weighted	12	0.94681	0.0481462
	class.Gammaproteobacteria.id.33	Pain (limb, back, neck, head abdominally)	MR Egger	9	0.898116	0.343959
	class.Gammaproteobacteria.id.33	Pain (limb, back, neck, head abdominally)	Weighted median	9	0.929817	0.0801299
	class.Gammaproteobacteria.id.33	Pain (limb, back, neck, head abdominally)	Inverse variance weighted	9	0.93515	0.0313069
	family.Prevotellaceae.id.960	Pain (limb, back, neck, head abdominally)	MR Egger	18	1.08548	0.218653
	family.Prevotellaceae.id.960	Pain (limb, back, neck, head abdominally)	Weighted median	18	1.05285	0.063847
	family.Prevotellaceae.id.960	Pain (limb, back, neck, head abdominally)	Inverse variance weighted	18	1.04618	0.021104
	family.Verrucomicrobiaceae.id.4	Pain (limb, back, neck, head abdominally)	MR Egger	12	1.01458	0.886093
	family.Verrucomicrobiaceae.id.4	Pain (limb, back, neck, head abdominally)	Weighted median	12	0.956851	0.176192
	family.Verrucomicrobiaceae.id.4	Pain (limb, back, neck, head abdominally)	Inverse variance weighted	12	0.946767	0.047966
	class.Negativicutes.id.2164	Pain (limb, back, neck, head abdominally)	MR Egger	13	1.15835	0.215954
	class.Negativicutes.id.2164	Pain (limb, back, neck, head abdominally)	Weighted median	13	1.05836	0.125432
	class.Negativicutes.id.2164	Pain (limb, back, neck, head abdominally)	Inverse variance weighted	13	1.08154	0.0115394
	genus..Eubacteriumfissicatenagr	Pain (limb, back, neck, head abdominally)	MR Egger	9	1.16347	0.119045
	genus..Eubacteriumfissicatenagr	Pain (limb, back, neck, head abdominally)	Weighted median	9	1.01741	0.426338
	genus..Eubacteriumfissicatenagr	Pain (limb, back, neck, head abdominally)	Inverse variance weighted	9	1.03607	0.0409857
	genus..Eubacteriumnodatumgroup.	Pain (limb, back, neck, head abdominally)	MR Egger	11	0.964198	0.534166
	genus..Eubacteriumnodatumgroup.	Pain (limb, back, neck, head abdominally)	Weighted median	11	0.98523	0.372609
	genus..Eubacteriumnodatumgroup.	Pain (limb, back, neck, head abdominally)	Inverse variance weighted	11	0.973266	0.0323063
	class.Verrucomicrobiae.id.4029	Pain (limb, back, neck, head abdominally)	MR Egger	12	1.015	0.882845
	class.Verrucomicrobiae.id.4029	Pain (limb, back, neck, head abdominally)	Weighted median	12	0.9572	0.156578
	class.Verrucomicrobiae.id.4029	Pain (limb, back, neck, head abdominally)	Inverse variance weighted	12	0.94681	0.0481462
	genus.Akkermansia.id.4037	Pain (limb, back, neck, head abdominally)	MR Egger	12	1.01279	0.899838
	genus.Akkermansia.id.4037	Pain (limb, back, neck, head abdominally)	Weighted median	12	0.955999	0.153702
	genus.Akkermansia.id.4037	Pain (limb, back, neck, head abdominally)	Inverse variance weighted	12	0.946652	0.0471764

## Sheet: ST3
Supplementary Table 3. Casual effects of MR analysis between gut metabolites and pain (IVW , p<0.05)
	Exposure	Outcome	Method	nsnp	OR (95%CI)	p-value	Q	Q_df	Q_pval
limb pain	Serotonin (5HT)	limb pain	Inverse variance weighted	15	1.29337	0.0175069	14.9513	14	0.381493
	Serotonin (5HT)	limb pain	MR Egger	15	1.08657	0.673285	16.1437	15	0.372564
	Serotonin (5HT)	limb pain	Weighted median	15	1.1937	0.206606
	Glycine	limb pain	Inverse variance weighted	100	1.03428	0.0265063	94.7075	116	0.926397
	Glycine	limb pain	MR Egger	100	1.05504	0.00286147	101.451	117	0.846431
	Glycine	limb pain	Weighted median	100	1.04879	0.00538221
Atypical facial pain	Trimethylamino oxide（TMAO）	Atypical facial pain	Inverse variance weighted	21	0.885554	0.0134546	11.0188	15	0.751261
	Trimethylamino oxide（TMAO）	Atypical facial pain	MR Egger	21	0.823652	0.0565623	12.1456	16	0.733897
	Trimethylamino oxide（TMAO）	Atypical facial pain	Weighted median	21	0.943909	0.4123

## Sheet: ST4
Supplementary Table 4.Heterogeneity tests between gut microbiota and pain
	Exposure	Outcome	Method	Q	Q_df	Q_pval
(1)headache	family.ClostridialesvadinBB60gr	Cluster headache, strict, including avohilmo	MR Egger	10.7753	15	0.768353
	family.ClostridialesvadinBB60gr	Cluster headache, strict, including avohilmo	Inverse variance weighted	11.8231	16	0.756062
	order.Burkholderiales.id.2874.	Cluster headache, strict, including avohilmo	MR Egger	5.19151	10	0.878023
	order.Burkholderiales.id.2874.	Cluster headache, strict, including avohilmo	Inverse variance weighted	7.83684	11	0.72784
	phylum.Actinobacteria.id.400.	Cluster headache, strict, including avohilmo	MR Egger	7.55752	14	0.911083
	phylum.Actinobacteria.id.400.	Cluster headache, strict, including avohilmo	Inverse variance weighted	8.63069	15	0.896023
	class.Betaproteobacteria.id.286.	Cluster headache, strict, including avohilmo	MR Egger	6.39051	11	0.84608
	class.Betaproteobacteria.id.286.	Cluster headache, strict, including avohilmo	Inverse variance weighted	8.0123	12	0.784168
	genus.Coprococcus1.id.11301.	Cluster headache, strict, including avohilmo	MR Egger	13.0475	12	0.365599
	genus.Coprococcus1.id.11301.	Cluster headache, strict, including avohilmo	Inverse variance weighted	13.0821	13	0.441487
	family.Alcaligenaceae.id.2875.	Cluster headache, strict, including avohilmo	MR Egger	7.06851	14	0.932039
	family.Alcaligenaceae.id.2875.	Cluster headache, strict, including avohilmo	Inverse variance weighted	9.39468	15	0.855994
	family.Bifidobacteriaceae.id.43.	Migraine	MR Egger	16.3942	15	0.356351
	family.Bifidobacteriaceae.id.43.	Migraine	Inverse variance weighted	17.184	16	0.373791
	genus.Oxalobacter.id.2978.	Migraine	MR Egger	11.2397	10	0.339147
	genus.Oxalobacter.id.2978.	Migraine	Inverse variance weighted	11.2587	11	0.421854
	genus.Victivallis.id.2256.	Migraine	MR Egger	4.56279	10	0.918409
	genus.Victivallis.id.2256.	Migraine	Inverse variance weighted	6.52594	11	0.836073
	genus..Eubacteriumcoprostanolig.	Migraine	MR Egger	9.489	11	0.57685
	genus..Eubacteriumcoprostanolig.	Migraine	Inverse variance weighted	9.57749	12	0.652972
	genus..Eubacteriumrectalegroup..	Migraine	MR Egger	4.64508	9	0.864086
	genus..Eubacteriumrectalegroup..	Migraine	Inverse variance weighted	8.5739	10	0.572962
	genus.Bifidobacterium.id.436.	Migraine	MR Egger	23.9905	13	0.0312173
	genus.Bifidobacterium.id.436.	Migraine	Inverse variance weighted	24.3689	14	0.0413339
(2)Ocular pain	genus.Intestinimonas.id.2062.	Ocular pain	MR Egger	18.2659	17	0.372253
	genus.Intestinimonas.id.2062.	Ocular pain	Inverse variance weighted	18.2669	18	0.438204
	genus.Oxalobacter.id.2978.	Ocular pain	MR Egger	5.85474	10	0.827316
	genus.Oxalobacter.id.2978.	Ocular pain	Inverse variance weighted	7.87764	11	0.724221
	genus.RuminococcaceaeUCG014.id..	Ocular pain	MR Egger	12.6308	14	0.555782
	genus.RuminococcaceaeUCG014.id..	Ocular pain	Inverse variance weighted	13.7042	15	0.548072
	order.Bacillales.id.1674.	Ocular pain	MR Egger	4.38758	7	0.734208
	order.Bacillales.id.1674.	Ocular pain	Inverse variance weighted	5.08596	8	0.748351
	order.Clostridiales.id.1863.	Ocular pain	MR Egger	15.5492	12	0.212768
	order.Clostridiales.id.1863.	Ocular pain	Inverse variance weighted	15.5493	13	0.274326
	class.Clostridia.id.1859.	Ocular pain	MR Egger	17.6008	13	0.173274
	class.Clostridia.id.1859.	Ocular pain	Inverse variance weighted	17.6524	14	0.223073
(3)facial pain	genus.Phascolarctobacterium.id..	Atypical facial pain	MR Egger	3.94781	8	0.861801
	genus.Phascolarctobacterium.id..	Atypical facial pain	Inverse variance weighted	4.11023	9	0.904009
	genus.RuminococcaceaeUCG005.id..	Atypical facial pain	MR Egger	12.6145	15	0.632044
	genus.RuminococcaceaeUCG005.id..	Atypical facial pain	Inverse variance weighted	12.8387	16	0.684514
	phylum.Bacteroidetes.id.905.	Atypical facial pain	MR Egger	7.73022	10	0.65517
	phylum.Bacteroidetes.id.905.	Atypical facial pain	Inverse variance weighted	9.37176	11	0.587618
	familyfamily.id.1000006.	Atypical facial pain	MR Egger	11.6782	13	0.554194
	familyfamily.id.1000006.	Atypical facial pain	Inverse variance weighted	12.25	14	0.586235
	genus.Anaerofilum.id.2053.	Atypical facial pain	MR Egger	7.47671	9	0.587614
	genus.Anaerofilum.id.2053.	Atypical facial pain	Inverse variance weighted	7.9902	10	0.629794
	genus.Tyzzerella3.id.11335	Facial pains for 3+ months || id:ukb-d-4067	MR Egger	9.77862	11	0.550404
	genus.Tyzzerella3.id.11335	Facial pains for 3+ months || id:ukb-d-4068	Inverse variance weighted	9.87455	12	0.626965
	order.Erysipelotrichales.id.214	Facial pains for 3+ months || id:ukb-d-4069	MR Egger	8.40002	11	0.677085
	order.Erysipelotrichales.id.214	Facial pains for 3+ months || id:ukb-d-4070	Inverse variance weighted	9.31212	12	0.676065
	family.Erysipelotrichaceae.id.2	Facial pains for 3+ months || id:ukb-d-4071	MR Egger	8.40002	11	0.677085
	family.Erysipelotrichaceae.id.2	Facial pains for 3+ months || id:ukb-d-4072	Inverse variance weighted	9.31212	12	0.676065
	phylum.Verrucomicrobia.id.3982	Facial pains for 3+ months || id:ukb-d-4073	MR Egger	10.4489	10	0.402026
	phylum.Verrucomicrobia.id.3982	Facial pains for 3+ months || id:ukb-d-4074	Inverse variance weighted	11.2017	11	0.426522
	class.Erysipelotrichia.id.2147	Facial pains for 3+ months || id:ukb-d-4075	MR Egger	8.40002	11	0.677085
	class.Erysipelotrichia.id.2147	Facial pains for 3+ months || id:ukb-d-4076	Inverse variance weighted	9.31212	12	0.676065
	genus.Butyricicoccus.id.2055	Facial pains for 3+ months || id:ukb-d-4077	MR Egger	5.51732	7	0.597095
	genus.Butyricicoccus.id.2055	Facial pains for 3+ months || id:ukb-d-4078	Inverse variance weighted	5.62876	8	0.688737
(4)neck or shoulder pain	genus.LachnospiraceaeUCG010.id.	Neck/shoulder pain for 3+ months || id:ukb-b-16118	MR Egger	3.53326	10	0.965957
	genus.LachnospiraceaeUCG010.id.	Neck/shoulder pain for 3+ months || id:ukb-b-16118	Inverse variance weighted	4.66735	11	0.946201
	genus.Methanobrevibacter.id.123	Neck/shoulder pain for 3+ months || id:ukb-b-16118	MR Egger	6.5184	6	0.367686
	genus.Methanobrevibacter.id.123	Neck/shoulder pain for 3+ months || id:ukb-b-16118	Inverse variance weighted	7.59038	7	0.370095
	order.Gastranaerophilales.id.15	Neck/shoulder pain for 3+ months || id:ukb-b-16118	MR Egger	5.70687	10	0.83926
	order.Gastranaerophilales.id.15	Neck/shoulder pain for 3+ months || id:ukb-b-16118	Inverse variance weighted	7.31792	11	0.772785
	class.Melainabacteria.id.1589	Neck/shoulder pain for 3+ months || id:ukb-b-16118	MR Egger	7.15358	11	0.786513
	class.Melainabacteria.id.1589	Neck/shoulder pain for 3+ months || id:ukb-b-16118	Inverse variance weighted	9.40184	12	0.668278
	family.Rhodospirillaceae.id.271	Neck/shoulder pain for 3+ months || id:ukb-b-16118	MR Egger	22.1178	15	0.104752
	family.Rhodospirillaceae.id.271	Neck/shoulder pain for 3+ months || id:ukb-b-16118	Inverse variance weighted	22.1792	16	0.1375
	genus..Eubacteriumnodatumgroup.	Neck/shoulder pain for 3+ months || id:ukb-b-16118	MR Egger	7.27409	9	0.608607
	genus..Eubacteriumnodatumgroup.	Neck/shoulder pain for 3+ months || id:ukb-b-16118	Inverse variance weighted	7.69482	10	0.658619
	genus.Faecalibacterium.id.2057	Neck/shoulder pain for 3+ months || id:ukb-b-16118	MR Egger	6.4823	11	0.839327
	genus.Faecalibacterium.id.2057	Neck/shoulder pain for 3+ months || id:ukb-b-16118	Inverse variance weighted	11.1166	12	0.518956
(5)back pain	genus.Olsenella.id.822	back pain	MR Egger	9.34656	8	0.313909
	genus.Olsenella.id.822	back pain	Inverse variance weighted	10.7678	9	0.291962
	genus.Oxalobacter.id.2978	back pain	MR Egger	7.37718	10	0.689422
	genus.Oxalobacter.id.2978	back pain	Inverse variance weighted	7.56531	11	0.751632
	genus.Oxalobacter.id.2978	back pain	MR Egger	16.0188	15	0.380804
	genus.Roseburia.id.2012	back pain	Inverse variance weighted	16.0303	16	0.450846
	genus.RuminococcaceaeUCG011.id.	back pain	MR Egger	6.19919	6	0.401251
	genus.RuminococcaceaeUCG011.id.	back pain	Inverse variance weighted	10.2226	7	0.176305
	familyfamilyXIII.id.1957	back pain	MR Egger	2.27867	8	0.971254
	familyfamilyXIII.id.1957	back pain	Inverse variance weighted	4.42757	9	0.881089
	genus..Eubacteriumfissicatenagr	back pain	MR Egger	13.198	7	0.0674293
	genus..Eubacteriumfissicatenagr	back pain	Inverse variance weighted	14.2021	8	0.0766482
	genus..Eubacteriumrectalegroup.	back pain	MR Egger	11.7669	9	0.226772
	genus..Eubacteriumrectalegroup.	back pain	Inverse variance weighted	12.4587	10	0.255529
	genus.Collinsella.id.815	back pain	MR Egger	4.44242	10	0.92519
	genus.Collinsella.id.815	back pain	Inverse variance weighted	4.55445	11	0.950814
	genus.Olsenella.id.822	Lower back pain or/and sciatica	MR Egger	12.3672	8	0.135556
	genus.Olsenella.id.822	Lower back pain or/and sciatica	Inverse variance weighted	12.5115	9	0.185986
	genus.Oxalobacter.id.2978	Lower back pain or/and sciatica	MR Egger	9.51426	10	0.48409
	genus.Oxalobacter.id.2978	Lower back pain or/and sciatica	Inverse variance weighted	9.63959	11	0.563067
	genus.Ruminiclostridium6.id.113	Lower back pain or/and sciatica	MR Egger	11.1042	14	0.67783
	genus.Ruminiclostridium6.id.113	Lower back pain or/and sciatica	Inverse variance weighted	11.1373	15	0.742801
	genus.RuminococcaceaeUCG005.id.	Lower back pain or/and sciatica	MR Egger	14.3308	15	0.500604
	genus.RuminococcaceaeUCG005.id.	Lower back pain or/and sciatica	Inverse variance weighted	14.3815	16	0.570313
	genus.RuminococcaceaeUCG011.id.	Lower back pain or/and sciatica	MR Egger	5.8847	6	0.436229
	genus.RuminococcaceaeUCG011.id.	Lower back pain or/and sciatica	Inverse variance weighted	6.95795	7	0.433271
	genus.Tyzzerella3.id.11335	Lower back pain or/and sciatica	MR Egger	7.01012	11	0.798263
	genus.Tyzzerella3.id.11335	Lower back pain or/and sciatica	Inverse variance weighted	7.02501	12	0.855956
	phylum.Firmicutes.id.1672	Lower back pain or/and sciatica	MR Egger	11.1945	16	0.797325
	phylum.Firmicutes.id.1672	Lower back pain or/and sciatica	Inverse variance weighted	12.0938	17	0.794423
	family.Prevotellaceae.id.960	Lower back pain or/and sciatica	MR Egger	28.3037	16	0.0290767
	family.Prevotellaceae.id.960	Lower back pain or/and sciatica	Inverse variance weighted	29.0391	17	0.0341677
	genus..Eubacteriumfissicatenagr	Lower back pain or/and sciatica	MR Egger	8.75808	7	0.270495
	genus..Eubacteriumfissicatenagr	Lower back pain or/and sciatica	Inverse variance weighted	10.5564	8	0.228124
	genus.Collinsella.id.815	Lower back pain or/and sciatica	MR Egger	1.7643	10	0.997848
	genus.Collinsella.id.815	Lower back pain or/and sciatica	Inverse variance weighted	3.02715	11	0.990362
(6)knee pain	order.Rhodospirillales.id.2667	Knee pain for 3+ months || id:ukb-b-8906	MR Egger	7.067	13	0.898666
	order.Rhodospirillales.id.2667	Knee pain for 3+ months || id:ukb-b-8906	Inverse variance weighted	7.10122	14	0.930739
	order.Selenomonadales.id.2165	Knee pain for 3+ months || id:ukb-b-8906	MR Egger	4.98799	11	0.931747
	order.Selenomonadales.id.2165	Knee pain for 3+ months || id:ukb-b-8906	Inverse variance weighted	6.62351	12	0.881459
	phylum.Proteobacteria.id.2375	Knee pain for 3+ months || id:ukb-b-8906	MR Egger	11.6415	12	0.47488
	phylum.Proteobacteria.id.2375	Knee pain for 3+ months || id:ukb-b-8906	Inverse variance weighted	11.9166	13	0.534496
	family.Rhodospirillaceae.id.271	Knee pain for 3+ months || id:ukb-b-8906	MR Egger	13.9296	15	0.530871
	family.Rhodospirillaceae.id.271	Knee pain for 3+ months || id:ukb-b-8906	Inverse variance weighted	14.487	16	0.562485
	class.Negativicutes.id.2164	Knee pain for 3+ months || id:ukb-b-8906	MR Egger	4.98799	11	0.931747
	class.Negativicutes.id.2164	Knee pain for 3+ months || id:ukb-b-8906	Inverse variance weighted	6.62351	12	0.881459
	genus.Anaerofilum.id.2053	Knee pain for 3+ months || id:ukb-b-8906	MR Egger	8.60932	10	0.569538
	genus.Anaerofilum.id.2053	Knee pain for 3+ months || id:ukb-b-8906	Inverse variance weighted	9.0066	11	0.621283
(7)hip pain	class.Mollicutes.id.3920.	Hip pain for 3+ months || id:ukb-b-133	MR Egger	2.17787	10	0.994786
	class.Mollicutes.id.3920.	Hip pain for 3+ months || id:ukb-b-133	Inverse variance weighted	2.20427	11	0.99764
	family.Porphyromonadaceae.id.94.	Hip pain for 3+ months || id:ukb-b-133	MR Egger	9.17204	9	0.421548
	family.Porphyromonadaceae.id.94.	Hip pain for 3+ months || id:ukb-b-133	Inverse variance weighted	10.0429	10	0.436734
	genus.Adlercreutzia.id.812.	Hip pain for 3+ months || id:ukb-b-133	MR Egger	4.50254	10	0.921843
	genus.Adlercreutzia.id.812.	Hip pain for 3+ months || id:ukb-b-133	Inverse variance weighted	4.62658	11	0.947895
	genus.Eisenbergiella.id.11304.	Hip pain for 3+ months || id:ukb-b-133	MR Egger	10.5801	10	0.391156
	genus.Eisenbergiella.id.11304.	Hip pain for 3+ months || id:ukb-b-133	Inverse variance weighted	10.8924	11	0.452323
	genus.Roseburia.id.2012.	Hip pain for 3+ months || id:ukb-b-133	MR Egger	11.722	15	0.69994
	genus.Roseburia.id.2012.	Hip pain for 3+ months || id:ukb-b-133	Inverse variance weighted	11.8024	16	0.757464
	order.Bacteroidales.id.913.	Hip pain for 3+ months || id:ukb-b-133	MR Egger	7.90408	13	0.849792
	order.Bacteroidales.id.913.	Hip pain for 3+ months || id:ukb-b-133	Inverse variance weighted	8.55709	14	0.858335
	phylum.Tenericutes.id.3919.	Hip pain for 3+ months || id:ukb-b-133	MR Egger	2.17787	10	0.994786
	phylum.Tenericutes.id.3919.	Hip pain for 3+ months || id:ukb-b-133	Inverse variance weighted	2.20427	11	0.99764
	class.Bacteroidia.id.912.	Hip pain for 3+ months || id:ukb-b-133	MR Egger	7.90408	13	0.849792
	class.Bacteroidia.id.912.	Hip pain for 3+ months || id:ukb-b-133	Inverse variance weighted	8.55709	14	0.858335
(8)limb pain	genus.LachnospiraceaeND3007grou	limb pain	MR Egger	0.193729	1	0.659831
	genus.LachnospiraceaeND3007grou	limb pain	Inverse variance weighted	0.216548	2	0.897382
	genus.LachnospiraceaeNK4A136gro	limb pain	MR Egger	12.3777	14	0.575996
	genus.LachnospiraceaeNK4A136gro	limb pain	Inverse variance weighted	12.504	15	0.640552
	genus.RuminococcaceaeUCG003.id.	limb pain	MR Egger	10.701	12	0.554705
	genus.RuminococcaceaeUCG003.id.	limb pain	Inverse variance weighted	12.5113	13	0.486229
	genus.Anaerotruncus.id.2054	limb pain	MR Egger	11.5057	13	0.568533
	genus.Anaerotruncus.id.2054	limb pain	Inverse variance weighted	12.7825	14	0.543718
(9)joint pain	genus.Terrisporobacter.id.11348	joint pain	MR Egger	0.97386	4	0.913733
	genus.Terrisporobacter.id.11348	joint pain	Inverse variance weighted	1.52618	5	0.910029
	order.Selenomonadales.id.2165	joint pain	MR Egger	6.479	11	0.839571
	order.Selenomonadales.id.2165	joint pain	Inverse variance weighted	6.72235	12	0.875403
	class.Negativicutes.id.2164	joint pain	MR Egger	6.479	11	0.839571
	class.Negativicutes.id.2164	joint pain	Inverse variance weighted	6.72235	12	0.875403
	genus..Eubacteriumoxidoreducens	joint pain	MR Egger	4.53529	4	0.338384
	genus..Eubacteriumoxidoreducens	joint pain	Inverse variance weighted	5.5	5	0.357946
	genus.Dialister.id.2183	joint pain	MR Egger	8.53611	10	0.576619
	genus.Dialister.id.2183	joint pain	Inverse variance weighted	11.0173	11	0.441811
	family.Rhodospirillaceae.id.271	Fibromyalgia	MR Egger	18.3478	14	0.191394
	family.Rhodospirillaceae.id.271	Fibromyalgia	Inverse variance weighted	18.3496	15	0.244732
	genus.Erysipelatoclostridium.id	Fibromyalgia	MR Egger	25.0738	14	0.0338453
	genus.Erysipelatoclostridium.id	Fibromyalgia	Inverse variance weighted	25.1642	15	0.0477817
(11)Pain in thoracic spine	genus.Lachnospira.id.2004	Pain in thoracic spine	MR Egger	1.98016	5	0.851884
	genus.Lachnospira.id.2004	Pain in thoracic spine	Inverse variance weighted	1.98287	6	0.921268
	genus.Butyricimonas.id.945	Pain in thoracic spine	MR Egger	11.0867	15	0.746427
	genus.Butyricimonas.id.945	Pain in thoracic spine	Inverse variance weighted	11.2877	16	0.791386
（12）Pain (limb, back, neck, head abdominally)	genus.Olsenella.id.822	Pain (limb, back, neck, head abdominally)	MR Egger	11.1604	8	0.192776
	genus.Olsenella.id.822	Pain (limb, back, neck, head abdominally)	Inverse variance weighted	12.8754	9	0.168326
	genus.Oscillibacter.id.2063	Pain (limb, back, neck, head abdominally)	MR Egger	16.406	14	0.289216
	genus.Oscillibacter.id.2063	Pain (limb, back, neck, head abdominally)	Inverse variance weighted	18.9609	15	0.215512
	order.Clostridiales.id.1863	Pain (limb, back, neck, head abdominally)	MR Egger	8.3347	12	0.758458
	order.Clostridiales.id.1863	Pain (limb, back, neck, head abdominally)	Inverse variance weighted	8.86469	13	0.783084
	order.Selenomonadales.id.2165	Pain (limb, back, neck, head abdominally)	MR Egger	16.3408	11	0.128944
	order.Selenomonadales.id.2165	Pain (limb, back, neck, head abdominally)	Inverse variance weighted	16.9476	12	0.15158
	order.Verrucomicrobiales.id.403	Pain (limb, back, neck, head abdominally)	MR Egger	16.7811	10	0.079351
	order.Verrucomicrobiales.id.403	Pain (limb, back, neck, head abdominally)	Inverse variance weighted	17.6928	11	0.0889872
	class.Gammaproteobacteria.id.33	Pain (limb, back, neck, head abdominally)	MR Egger	5.46682	7	0.603189
	class.Gammaproteobacteria.id.33	Pain (limb, back, neck, head abdominally)	Inverse variance weighted	5.62624	8	0.689017
	family.Prevotellaceae.id.960	Pain (limb, back, neck, head abdominally)	MR Egger	16.4957	16	0.418931
	family.Prevotellaceae.id.960	Pain (limb, back, neck, head abdominally)	Inverse variance weighted	16.8739	17	0.462941
	family.Verrucomicrobiaceae.id.4	Pain (limb, back, neck, head abdominally)	MR Egger	16.7832	10	0.0793016
	family.Verrucomicrobiaceae.id.4	Pain (limb, back, neck, head abdominally)	Inverse variance weighted	17.6854	11	0.0891746
	class.Negativicutes.id.2164	Pain (limb, back, neck, head abdominally)	MR Egger	16.3408	11	0.128944
	class.Negativicutes.id.2164	Pain (limb, back, neck, head abdominally)	Inverse variance weighted	16.9476	12	0.15158
	genus..Eubacteriumfissicatenagr	Pain (limb, back, neck, head abdominally)	MR Egger	7.83405	7	0.347455
	genus..Eubacteriumfissicatenagr	Pain (limb, back, neck, head abdominally)	Inverse variance weighted	9.98404	8	0.266148
	genus..Eubacteriumnodatumgroup.	Pain (limb, back, neck, head abdominally)	MR Egger	8.46989	9	0.487571
	genus..Eubacteriumnodatumgroup.	Pain (limb, back, neck, head abdominally)	Inverse variance weighted	8.49889	10	0.580225
	class.Verrucomicrobiae.id.4029	Pain (limb, back, neck, head abdominally)	MR Egger	16.7811	10	0.079351
	class.Verrucomicrobiae.id.4029	Pain (limb, back, neck, head abdominally)	Inverse variance weighted	17.6928	11	0.0889872
	genus.Akkermansia.id.4037	Pain (limb, back, neck, head abdominally)	MR Egger	16.7914	10	0.0791084
	genus.Akkermansia.id.4037	Pain (limb, back, neck, head abdominally)	Inverse variance weighted	17.6523	11	0.0900067

## Sheet: ST5
Supplementary Table 5. Heterogeneity tests between gut metabolites and pain
	Exposure	Outcome	Method	Q	Q_df	Q_pval
limb pain	Serotonin (5-HT)	limb pain	MR Egger	14.9513	14	0.381493
	Serotonin (5-HT)	limb pain	Inverse variance weighted	16.1437	15	0.372564
	Glycine	limb pain	MR Egger	94.7075	116	0.926397
	Glycine	limb pain	Inverse variance weighted	101.451	117	0.846431
Atypical facial pain	Trimethylamino oxide（TMAO）	Atypical facial pain	MR Egger	11.0188	15	0.751261
	Trimethylamino oxide（TMAO）	Atypical facial pain	Inverse variance weighted	12.1456	16	0.733897

## Sheet: ST6
Supplemental Table 6. Instruments for gut microbiota
Outcome	exposure
Pain in joint	Negativicutes	SNP	b	se	p	lo_ci	up_ci	or	or_lci95	or_uci95
		rs1135612	0.0416399	0.213719	0.845522	-0.377249	0.460529	1.04252	0.685745	1.58491
		rs13086907	-0.027489	0.177081	0.876637	-0.374568	0.31959	0.972885	0.687586	1.37656
		rs1447205	0.00711761	0.191394	0.970335	-0.368014	0.382249	1.00714	0.692108	1.46558
		rs1643968	-0.0680498	0.1701	0.689113	-0.401445	0.265345	0.934214	0.669352	1.30388
		rs1649999	-0.0134114	0.209189	0.948881	-0.423421	0.396599	0.986678	0.654803	1.48676
		rs2834062	0.197216	0.206377	0.339267	-0.207282	0.601715	1.21801	0.81279	1.82525
		rs4463806	0.114746	0.215425	0.594277	-0.307487	0.536979	1.12159	0.735292	1.71083
		rs4722181	0.313683	0.184007	0.0882443	-0.046971	0.674337	1.36846	0.954115	1.96273
		rs60274479	0.190792	0.176058	0.278503	-0.154282	0.535866	1.21021	0.857031	1.70893
		rs61249479	0.0498161	0.163402	0.760467	-0.270453	0.370085	1.05108	0.763034	1.44786
		rs71405394	0.0295539	0.16017	0.853609	-0.28438	0.343488	1.02999	0.752481	1.40986
		rs73232831	0.20715	0.167012	0.214854	-0.120194	0.534495	1.23017	0.886748	1.70659
		rs9423647	0.380538	0.193742	0.0495125	0.000804441	0.760272	1.46307	1.0008	2.13886
		All - Inverse variance weighted	0.10586	0.0510148	0.0379791	0.00587081	0.205849	1.11167	1.00589	1.22857
		All - MR Egger	0.0207269	0.179961	0.910382	-0.331997	0.373451	1.02094	0.717489	1.45274
	Eubacteriumoxidoreducens	SNP	b	se	p	lo_ci	up_ci	or	or_lci95	or_uci95
		rs12129908	-0.184989	0.105319	0.0790073	-0.391414	0.021435	0.831113	0.6761	1.02167
		rs12423772	-0.0440969	0.0924091	0.633226	-0.225219	0.137025	0.956861	0.798342	1.14686
		rs1425962	-0.0440968	0.104239	0.672269	-0.248405	0.160211	0.956861	0.780044	1.17376
		rs2973294	0.0399871	0.101059	0.69234	-0.158088	0.238062	1.0408	0.853775	1.26879
		rs34561138	-0.263017	0.111447	0.0182738	-0.481453	-0.0445813	0.768729	0.617885	0.956398
		rs440215	-0.136961	0.0994479	0.168445	-0.331879	0.0579564	0.872004	0.717574	1.05967
		All - Inverse variance weighted	-0.0984903	0.0435933	0.0238647	-0.183933	-0.0130475	0.906204	0.831991	0.987037
		All - MR Egger	-0.255703	0.176088	0.220108	-0.600835	0.0894297	0.774372	0.548354	1.09355
	Dialister	SNP	b	se	p	lo_ci	up_ci	or	or_lci95	or_uci95
		rs10138457	0.421043	0.141632	0.00295095	0.143445	0.698641	1.52355	1.15424	2.01102
		rs10938938	0.192424	0.163533	0.239327	-0.1281	0.512949	1.21218	0.879765	1.67021
		rs11071887	0.00138805	0.148551	0.992545	-0.289771	0.292547	1.00139	0.748435	1.33984
		rs11166701	0.0042816	0.140949	0.975766	-0.271977	0.280541	1.00429	0.761871	1.32385
		rs2314294	-0.00839214	0.155949	0.957084	-0.314052	0.297267	0.991643	0.730481	1.34618
		rs2435610	0.167745	0.164874	0.308956	-0.155408	0.490897	1.18263	0.856066	1.63378
		rs4747450	0.146495	0.165592	0.376333	-0.178066	0.471056	1.15777	0.836887	1.60169
		rs4753063	-0.16936	0.155122	0.274927	-0.473399	0.134679	0.844205	0.622881	1.14417
		rs517089	0.250687	0.161125	0.119744	-0.0651188	0.566492	1.28491	0.936956	1.76208
		rs75416973	0.0756365	0.152712	0.620398	-0.22368	0.374953	1.07857	0.799571	1.45492
		rs764177	0.0797363	0.159479	0.61709	-0.232843	0.392316	1.083	0.792278	1.48041
		rs76680460	0.0899482	0.141896	0.526143	-0.188167	0.368064	1.09412	0.828476	1.44493
		All - Inverse variance weighted	0.10427	0.0443499	0.0187197	0.0173438	0.191196	1.1099	1.0175	1.2107
		All - MR Egger	0.3932	0.188703	0.0637999	0.0233433	0.763057	1.48171	1.02362	2.14482
	Terrisporobacter	SNP	b	se	p	lo_ci	up_ci	or	or_lci95	or_uci95
		rs1883097	-0.0600728	0.107429	0.576033	-0.270633	0.150487	0.941696	0.762897	1.1624
		rs2569953	-0.163001	0.120121	0.174789	-0.398438	0.0724359	0.84959	0.671368	1.07512
		rs2872237	-0.194621	0.115371	0.0916195	-0.420749	0.031506	0.823146	0.656555	1.03201
		rs58405430	-0.0218743	0.146175	0.881045	-0.308378	0.264629	0.978363	0.734638	1.30295
		rs7034891	-0.0536921	0.117997	0.649088	-0.284966	0.177582	0.947724	0.75204	1.19433
		rs7184125	-0.110568	0.113007	0.327869	-0.332062	0.110926	0.895325	0.717442	1.11731
		All - Inverse variance weighted	-0.104347	0.0483363	0.0308675	-0.199086	-0.00960812	0.900912	0.819479	0.990438
		All - MR Egger	0.00698346	0.157408	0.96674	-0.301536	0.315502	1.00701	0.739682	1.37095
	unknowngenus.id.2041	SNP	b	se	p	lo_ci	up_ci	or	or_lci95	or_uci95
		rs11941716	-0.0518477	0.127918	0.685242	-0.302567	0.198871	0.949473	0.738919	1.22003
		rs16843660	-0.169025	0.114366	0.139424	-0.393182	0.0551312	0.844487	0.674906	1.05668
		rs1962916	-0.259952	0.12941	0.0445642	-0.513595	-0.00630802	0.771089	0.598341	0.993712
		rs2336448	-0.364968	0.119167	0.00219377	-0.598535	-0.131401	0.694219	0.549616	0.876866
		rs249459	-0.00913356	0.131786	0.944746	-0.267434	0.249167	0.990908	0.765341	1.28296
		rs2646833	-0.170517	0.1396	0.221909	-0.444133	0.103099	0.843229	0.64138	1.1086
		rs2651663	0.0236794	0.124656	0.849342	-0.220646	0.268005	1.02396	0.802	1.30735
		rs35703006	-0.0564274	0.116053	0.626812	-0.283892	0.171037	0.945135	0.752848	1.18653
		rs553072	-0.274198	0.109136	0.0119897	-0.488104	-0.0602919	0.760182	0.613789	0.94149
		rs6514318	-0.253091	0.170682	0.138123	-0.587628	0.0814465	0.776397	0.555644	1.08486
		rs7187855	-0.103437	0.110918	0.351051	-0.320836	0.113963	0.901733	0.725542	1.12071
		rs921383	0.130774	0.131074	0.318421	-0.126132	0.387679	1.13971	0.881499	1.47356
		All - Inverse variance weighted	-0.131649	0.0413135	0.00143957	-0.212624	-0.050675	0.876648	0.80846	0.950588
		All - MR Egger	-0.210334	0.138495	0.159797	-0.481783	0.0611156	0.810314	0.617681	1.06302
	Selenomonadales	SNP	b	se	p	lo_ci	up_ci	or	or_lci95	or_uci95
		rs1135612	0.0416399	0.213719	0.845522	-0.377249	0.460529	1.04252	0.685745	1.58491
		rs13086907	-0.027489	0.177081	0.876637	-0.374568	0.31959	0.972885	0.687586	1.37656
		rs1447205	0.00711761	0.191394	0.970335	-0.368014	0.382249	1.00714	0.692108	1.46558
		rs1643968	-0.0680498	0.1701	0.689113	-0.401445	0.265345	0.934214	0.669352	1.30388
		rs1649999	-0.0134114	0.209189	0.948881	-0.423421	0.396599	0.986678	0.654803	1.48676
		rs2834062	0.197216	0.206377	0.339267	-0.207282	0.601715	1.21801	0.81279	1.82525
		rs4463806	0.114746	0.215425	0.594277	-0.307487	0.536979	1.12159	0.735292	1.71083
		rs4722181	0.313683	0.184007	0.0882443	-0.046971	0.674337	1.36846	0.954115	1.96273
		rs60274479	0.190792	0.176058	0.278503	-0.154282	0.535866	1.21021	0.857031	1.70893
		rs61249479	0.0498161	0.163402	0.760467	-0.270453	0.370085	1.05108	0.763034	1.44786
		rs71405394	0.0295539	0.16017	0.853609	-0.28438	0.343488	1.02999	0.752481	1.40986
		rs73232831	0.20715	0.167012	0.214854	-0.120194	0.534495	1.23017	0.886748	1.70659
		rs9423647	0.380538	0.193742	0.0495125	0.000804441	0.760272	1.46307	1.0008	2.13886
		All - Inverse variance weighted	0.10586	0.0510148	0.0379791	0.00587081	0.205849	1.11167	1.00589	1.22857
		All - MR Egger	0.0207269	0.179961	0.910382	-0.331997	0.373451	1.02094	0.717489	1.45274
Pain in limb	genus.Anaerotruncus.id.2054	SNP	b	se	p	lo_ci	up_ci	or	or_lci95	or_uci95
		rs10150232	0.200502	0.19051	0.292595	-0.172898	0.573901	1.22202	0.841223	1.77518
		rs11018566	0.137541	0.122327	0.260857	-0.10222	0.377301	1.14745	0.902831	1.45834
		rs115414803	0.120937	0.124034	0.329546	-0.12217	0.364045	1.12855	0.884998	1.43914
		rs12056802	0.211305	0.166819	0.205272	-0.11566	0.53827	1.23529	0.890778	1.71304
		rs1272208	0.0386746	0.165893	0.815661	-0.286476	0.363825	1.03943	0.750905	1.43882
		rs1431492	-0.124946	0.181264	0.49063	-0.480223	0.23033	0.882544	0.618645	1.25902
		rs17734739	-0.138838	0.187687	0.459463	-0.506704	0.229028	0.870369	0.602478	1.25738
		rs34449434	0.110896	0.18152	0.541248	-0.244884	0.466676	1.11728	0.782795	1.59468
		rs4669806	0.451403	0.182262	0.0132615	0.0941693	0.808638	1.57051	1.09875	2.24485
		rs6494922	0.166966	0.212066	0.431088	-0.248683	0.582615	1.18171	0.779827	1.79071
		rs6563550	0.291148	0.183469	0.112534	-0.0684512	0.650747	1.33796	0.933839	1.91697
		rs7155595	0.0442032	0.174393	0.799905	-0.297606	0.386013	1.04519	0.742594	1.4711
		rs7675045	-0.0176856	0.173368	0.918747	-0.357486	0.322115	0.98247	0.699432	1.38004
		rs8005030	-0.0109008	0.165278	0.947414	-0.334846	0.313045	0.989158	0.715448	1.36758
		rs9347879	-0.185235	0.170273	0.276651	-0.518969	0.148499	0.830909	0.595134	1.16009
		All - Inverse variance weighted	0.0874328	0.0430283	0.0421554	0.0030973	0.171768	1.09137	1.0031	1.1874
		All - MR Egger	0.226202	0.130129	0.105771	-0.0288507	0.481255	1.25383	0.971561	1.6181
	LachnospiraceaeND3007	SNP	b	se	p	lo_ci	up_ci	or	or_lci95	or_uci95
		rs2861203	0.256512	0.165479	0.121112	-0.0678259	0.580851	1.29241	0.934423	1.78756
		rs72776675	0.221782	0.177518	0.211537	-0.126153	0.569717	1.2483	0.88148	1.76777
		rs9932954	0.150649	0.162482	0.353836	-0.167815	0.469113	1.16259	0.84551	1.59858
		All - Inverse variance weighted	0.208345	0.0970689	0.0318442	0.0180898	0.3986	1.23164	1.01825	1.48974
		All - MR Egger	0.45514	1.63667	0.827325	-2.75272	3.663	1.57639	0.063754	38.9783
	LachnospiraceaeNK4A136	SNP	b	se	p	lo_ci	up_ci	or	or_lci95	or_uci95
		rs10952110	-0.154755	0.178405	0.385701	-0.504429	0.194918	0.856625	0.60385	1.21521
		rs11263806	-0.101169	0.173462	0.559736	-0.441154	0.238817	0.90378	0.643293	1.26975
		rs12362320	-0.139096	0.152841	0.362787	-0.438665	0.160473	0.870145	0.644897	1.17407
		rs12611395	-0.242241	0.155838	0.12008	-0.547684	0.0632022	0.784867	0.578288	1.06524
		rs160061	-0.0745794	0.167952	0.657004	-0.403764	0.254606	0.928134	0.667801	1.28995
		rs28540839	-0.131884	0.169761	0.437232	-0.464616	0.200849	0.876443	0.628376	1.22244
		rs2880566	0.111294	0.203301	0.584079	-0.287176	0.509765	1.11772	0.75038	1.6649
		rs4955932	0.0296445	0.181032	0.869925	-0.325177	0.384467	1.03009	0.722399	1.46883
		rs59805249	-0.366911	0.158221	0.0203967	-0.677025	-0.0567966	0.692872	0.508127	0.944786
		rs68104925	-0.0929604	0.170348	0.585265	-0.426842	0.240921	0.91123	0.652567	1.27242
		rs7073658	-0.0348442	0.173081	0.840451	-0.374084	0.304395	0.965756	0.687919	1.35581
		rs73044693	0.128496	0.158795	0.418405	-0.182743	0.439734	1.13712	0.832983	1.55229
		rs7616165	0.0530866	0.120996	0.660845	-0.184066	0.290239	1.05452	0.831881	1.33675
		rs76193507	-0.0732607	0.0667309	0.272269	-0.204053	0.0575318	0.929358	0.815419	1.05922
		rs7832116	-0.393678	0.180867	0.0295094	-0.748178	-0.0391785	0.674571	0.473228	0.961579
		rs954878	0.0329459	0.171713	0.847847	-0.303612	0.369504	1.03349	0.738147	1.44702
		All - Inverse variance weighted	-0.0840893	0.0358449	0.0189801	-0.154345	-0.0138333	0.919349	0.856976	0.986262
		All - MR Egger	-0.0612642	0.0735678	0.418961	-0.205457	0.0829288	0.940575	0.814275	1.08646
	RuminococcaceaeUCG003	SNP	b	se	p	lo_ci	up_ci	or	or_lci95	or_uci95
		rs10490280	-0.090011	0.164284	0.583761	-0.412007	0.231985	0.913921	0.66232	1.2611
		rs11243416	-0.172388	0.184674	0.350578	-0.534349	0.189574	0.841653	0.586051	1.20873
		rs11613919	-0.127393	0.142448	0.371155	-0.406592	0.151806	0.880387	0.665916	1.16393
		rs139730	-0.328693	0.172733	0.0570541	-0.667249	0.00986367	0.719864	0.513118	1.00991
		rs16959793	0.215691	0.140099	0.123667	-0.0589029	0.490284	1.24072	0.942798	1.63278
		rs2523124	-0.170765	0.161094	0.289131	-0.48651	0.14498	0.84302	0.614768	1.15602
		rs3013089	-0.220219	0.161463	0.1726	-0.536687	0.0962489	0.802343	0.584682	1.10103
		rs4452755	-0.154337	0.143773	0.283057	-0.436131	0.127458	0.856984	0.646533	1.13594
		rs4532474	-0.27516	0.151547	0.0694207	-0.572193	0.0218725	0.75945	0.564286	1.02211
		rs4629039	-0.171507	0.160279	0.284595	-0.485654	0.142639	0.842394	0.615295	1.15331
		rs646327	0.0163898	0.149139	0.912491	-0.275922	0.308701	1.01652	0.758872	1.36166
		rs6759615	-0.0757578	0.141327	0.591926	-0.352758	0.201242	0.927041	0.702747	1.22292
		rs73341549	0.0571273	0.109749	0.602697	-0.157981	0.272236	1.05879	0.853866	1.3129
		rs78720113	0.000757099	0.140173	0.99569	-0.273981	0.275496	1.00076	0.760346	1.31718
		All - Inverse variance weighted	-0.0849885	0.0396276	0.0319786	-0.162659	-0.00731837	0.918523	0.849881	0.992708
		All - MR Egger	0.0863839	0.133391	0.529439	-0.175062	0.34783	1.09022	0.839405	1.41599
	unknowngenus.id.2041	SNP	b	se	p	lo_ci	up_ci	or	or_lci95	or_uci95
		rs11941716	-0.120392	0.119837	0.315078	-0.355273	0.11449	0.886573	0.700982	1.1213
		rs16843660	-0.0249228	0.105908	0.813956	-0.232502	0.182657	0.975385	0.792548	1.2004
		rs1962916	-0.304124	0.121131	0.0120493	-0.541542	-0.0667066	0.737769	0.58185	0.93547
		rs2336448	-0.245998	0.111449	0.0272954	-0.464438	-0.0275577	0.781924	0.628488	0.972819
		rs249459	0.0750129	0.123182	0.542552	-0.166424	0.31645	1.0779	0.846687	1.37225
		rs2646833	-0.175489	0.130467	0.1786	-0.431205	0.0802271	0.839047	0.649726	1.08353
		rs2651663	0.0377416	0.116479	0.745922	-0.190557	0.26604	1.03846	0.826499	1.30479
		rs35703006	0.000146663	0.108601	0.998922	-0.212711	0.213004	1.00015	0.80839	1.23739
		rs553072	-0.104961	0.102198	0.304408	-0.305269	0.0953484	0.90036	0.736925	1.10004
		rs6514318	-0.0636752	0.158752	0.688347	-0.374828	0.247478	0.93831	0.687407	1.28079
		rs7187855	-0.0746989	0.10388	0.472084	-0.278303	0.128905	0.928023	0.757068	1.13758
		rs921383	0.12391	0.12265	0.312364	-0.116484	0.364304	1.13191	0.890044	1.43951
		All - Inverse variance weighted	-0.0733993	0.0358442	0.0405863	-0.143654	-0.00314466	0.92923	0.866187	0.99686
		All - MR Egger	-0.0619844	0.12187	0.622057	-0.30085	0.176881	0.939898	0.740189	1.19349
Low back pain	FamilyXIII.id.1957	SNP	b	se	p	lo_ci	up_ci	or	or_lci95	or_uci95
		rs10404377	-0.0970559	0.178667	0.586976	-0.447242	0.253131	0.907505	0.639389	1.28805
		rs118170811	0.10187	0.167927	0.544092	-0.227266	0.431006	1.10724	0.796709	1.53881
		rs12643275	-0.176372	0.178329	0.322651	-0.525897	0.173153	0.838306	0.591025	1.18905
		rs1999289	-0.0754564	0.163537	0.64451	-0.395989	0.245077	0.92732	0.673014	1.27772
		rs482905	-0.197469	0.169714	0.244609	-0.530108	0.135169	0.820805	0.588541	1.14473
		rs6501525	-0.233149	0.165805	0.159676	-0.558128	0.0918291	0.792035	0.57228	1.09618
		rs66753613	0.055971	0.173968	0.747657	-0.285007	0.396949	1.05757	0.752009	1.48728
		rs6797051	-0.168872	0.185371	0.362298	-0.532199	0.194455	0.844617	0.587312	1.21465
		rs7076829	-0.269083	0.177109	0.128685	-0.616217	0.0780506	0.76408	0.539983	1.08118
		rs7514702	-0.087012	0.185273	0.638611	-0.450148	0.276124	0.916666	0.637534	1.31801
		All - Inverse variance weighted	-0.113105	0.0550587	0.0399502	-0.22102	-0.00519001	0.893057	0.801701	0.994823
		All - MR Egger	0.224326	0.236678	0.370973	-0.239564	0.688216	1.25148	0.786971	1.99016
	Eubacteriumfissicatenagr	SNP	b	se	p	lo_ci	up_ci	or	or_lci95	or_uci95
		rs10147907	0.0657373	0.0971272	0.498522	-0.124632	0.256107	1.06795	0.882822	1.29189
		rs11818408	0.0661939	0.0849495	0.435853	-0.100307	0.232695	1.06843	0.90456	1.262
		rs11876297	-0.0907846	0.075239	0.22758	-0.238253	0.0566837	0.913214	0.788003	1.05832
		rs151257695	0.247523	0.0812363	0.00231175	0.0882999	0.406746	1.28085	1.09232	1.50192
		rs1768152	0.232863	0.102933	0.0236806	0.0311138	0.434612	1.26221	1.0316	1.54436
		rs2733072	0.0976924	0.0802532	0.223489	-0.0596038	0.254989	1.10262	0.942138	1.29045
		rs3771393	0.0322711	0.08477	0.703433	-0.133878	0.19842	1.0328	0.874697	1.21947
		rs6934739	0.18101	0.0835424	0.0302589	0.017267	0.344753	1.19843	1.01742	1.41164
		rs7104872	-0.00987182	0.10227	0.923102	-0.210321	0.190577	0.990177	0.810324	1.20995
		All - Inverse variance weighted	0.0868334	0.0384554	0.023944	0.0114608	0.162206	1.09071	1.01153	1.1761
		All - MR Egger	0.233772	0.205214	0.292112	-0.168446	0.635991	1.26336	0.844977	1.88889
	Oxalobacter.id.2978	SNP	b	se	p	lo_ci	up_ci	or	or_lci95	or_uci95
		rs10464997	0.0726555	0.082009	0.375647	-0.0880822	0.233393	1.07536	0.915686	1.26288
		rs11108500	0.112832	0.0787382	0.151856	-0.0414946	0.267159	1.11944	0.959355	1.30625
		rs111966731	0.0836902	0.0735361	0.255085	-0.0604405	0.227821	1.08729	0.94135	1.25586
		rs12002250	-0.0186543	0.0999832	0.851995	-0.214621	0.177313	0.981519	0.806847	1.194
		rs1569853	0.174428	0.0971288	0.0725194	-0.0159443	0.3648	1.19057	0.984182	1.44023
		rs36057338	0.0196273	0.119127	0.869134	-0.213862	0.253116	1.01982	0.80746	1.28803
		rs3862635	0.184797	0.0887936	0.0374153	0.0107621	0.358833	1.20297	1.01082	1.43166
		rs4428215	-0.0168224	0.0770888	0.827257	-0.167916	0.134272	0.983318	0.845425	1.1437
		rs6000536	0.0458008	0.0897828	0.609961	-0.130173	0.221775	1.04687	0.877943	1.24829
		rs6071435	0.0912318	0.0856969	0.287063	-0.0767341	0.259198	1.09552	0.926136	1.29589
		rs6993398	0.200533	0.088999	0.0242464	0.0260947	0.374971	1.22205	1.02644	1.45495
		rs736744	0.131443	0.0751042	0.0800934	-0.015761	0.278647	1.14047	0.984363	1.32134
		All - Inverse variance weighted	0.0918973	0.0247668	0.000206844	0.0433544	0.14044	1.09625	1.04431	1.15078
		All - MR Egger	0.0458507	0.10901	0.682937	-0.16781	0.259511	1.04692	0.845515	1.2963
	Eubacteriumrectalegroup	SNP	b	se	p	lo_ci	up_ci	or	or_lci95	or_uci95
		rs10248854	-0.249125	0.170105	0.143047	-0.582532	0.084281	0.779482	0.558483	1.08793
		rs10797540	-0.145486	0.175535	0.407209	-0.489534	0.198562	0.864602	0.612912	1.21965
		rs10892089	-0.230751	0.177635	0.193939	-0.578915	0.117414	0.793937	0.560506	1.12459
		rs143694765	-0.389127	0.167187	0.0199391	-0.716813	-0.0614399	0.677648	0.488306	0.940409
		rs16960159	-0.0962247	0.0951819	0.312037	-0.282781	0.0903318	0.90826	0.753685	1.09454
		rs2884897	0.115178	0.184841	0.533205	-0.24711	0.477466	1.12207	0.781055	1.61199
		rs314726	-0.429385	0.167236	0.0102423	-0.757168	-0.101602	0.650909	0.468993	0.903389
		rs35398954	-0.0558088	0.132558	0.673745	-0.315622	0.204005	0.94572	0.729335	1.2263
		rs3980709	-0.173875	0.185781	0.349318	-0.538005	0.190256	0.840402	0.583912	1.20956
		rs59427698	-0.0337811	0.195585	0.862873	-0.417128	0.349566	0.966783	0.658936	1.41845
		rs62547233	0.211137	0.181369	0.24437	-0.144345	0.56662	1.23508	0.865589	1.7623
		All - Inverse variance weighted	-0.132314	0.052483	0.0116996	-0.23518	-0.029447	0.876066	0.790428	0.970982
		All - MR Egger	-0.0322854	0.147648	0.831789	-0.321675	0.257105	0.96823	0.724933	1.29318
	Collinsella.id.815	SNP	b	se	p	lo_ci	up_ci	or	or_lci95	or_uci95
		rs10890671	-0.0817184	0.16472	0.619821	-0.40457	0.241134	0.921531	0.667263	1.27269
		rs11597285	-0.295258	0.166461	0.0761067	-0.621521	0.0310055	0.74434	0.537127	1.03149
		rs12921100	-0.202514	0.175646	0.248923	-0.546779	0.141751	0.816675	0.578811	1.15229
		rs1496626	-0.243741	0.178856	0.172952	-0.594299	0.106817	0.78369	0.551949	1.11273
		rs149807560	-0.23546	0.166397	0.157056	-0.561599	0.0906795	0.790208	0.570297	1.09492
		rs2103510	0.0686465	0.173671	0.692645	-0.271748	0.409041	1.07106	0.762046	1.50537
		rs2671662	-0.0377435	0.155185	0.807838	-0.341906	0.266419	0.96296	0.710415	1.30528
		rs59414781	-0.0178339	0.194507	0.926946	-0.399068	0.3634	0.982324	0.670945	1.43821
		rs62448871	-0.155556	0.164402	0.344049	-0.477784	0.166671	0.855939	0.620156	1.18137
		rs73052258	-0.00774012	0.176265	0.964975	-0.35322	0.33774	0.99229	0.702423	1.40178
		rs75672793	-0.0968285	0.192539	0.615032	-0.474204	0.280547	0.907712	0.62238	1.32385
		rs9541268	-0.135788	0.160139	0.39647	-0.44966	0.178083	0.873027	0.637845	1.19492
		All - Inverse variance weighted	-0.12232	0.0494468	0.0133692	-0.219236	-0.0254048	0.884865	0.803132	0.974915
		All - MR Egger	-0.0562563	0.203472	0.787809	-0.455062	0.34255	0.945297	0.634408	1.40853
	Olsenella.id.822	SNP	b	se	p	lo_ci	up_ci	or	or_lci95	or_uci95
		rs1035588	0.0158951	0.0839266	0.849784	-0.148601	0.180391	1.01602	0.861913	1.19769
		rs17148768	-0.0839774	0.083788	0.316218	-0.248202	0.0802471	0.919452	0.780202	1.08355
		rs2759329	0.0564836	0.0817754	0.489744	-0.103796	0.216763	1.05811	0.901409	1.24205
		rs35225860	-0.0726764	0.101632	0.474552	-0.271875	0.126522	0.929902	0.761949	1.13487
		rs61090148	0.00461219	0.0846661	0.956557	-0.161333	0.170558	1.00462	0.851008	1.18597
		rs62112538	-0.058629	0.0704762	0.405467	-0.196762	0.0795044	0.943057	0.821386	1.08275
		rs72691585	-0.146468	0.0512376	0.00425497	-0.246894	-0.0460428	0.863753	0.781223	0.955001
		rs7540303	-0.233693	0.0841384	0.00547812	-0.398604	-0.068782	0.791605	0.671256	0.93353
		rs8066522	-0.066855	0.0877766	0.446269	-0.238897	0.105187	0.935331	0.787496	1.11092
		rs9460691	-0.148683	0.0933141	0.111079	-0.331579	0.0342124	0.861842	0.71779	1.0348
		All - Inverse variance weighted	-0.0817931	0.0270229	0.0024715	-0.134758	-0.0288283	0.921463	0.873927	0.971583
		All - MR Egger	-0.171244	0.0853853	0.0798278	-0.338599	-0.00388861	0.842616	0.712768	0.996119
	Roseburia.id.2012	SNP	b	se	p	lo_ci	up_ci	or	or_lci95	or_uci95
		rs116270582	0.0567489	0.138639	0.682299	-0.214984	0.328482	1.05839	0.806554	1.38886
		rs12740451	-0.0741488	0.184595	0.687917	-0.435955	0.287657	0.928534	0.646647	1.3333
		rs147990086	-0.113882	0.19901	0.567159	-0.503941	0.276178	0.892364	0.604145	1.31808
		rs16910295	-0.175215	0.19832	0.376968	-0.563923	0.213493	0.839276	0.568972	1.23799
		rs2034589	0.0589955	0.182676	0.746732	-0.29905	0.417041	1.06077	0.741522	1.51746
		rs2160994	-0.0294382	0.168424	0.861248	-0.35955	0.300674	0.970991	0.69799	1.35077
		rs2943022	0.0558726	0.180552	0.756975	-0.298009	0.409754	1.05746	0.742295	1.50645
		rs302266	-0.321607	0.168542	0.0563696	-0.65195	0.00873601	0.724983	0.521029	1.00877
		rs329182	-0.0412496	0.173415	0.811985	-0.381143	0.298644	0.95959	0.68308	1.34803
		rs4748237	-0.290756	0.181183	0.108546	-0.645876	0.064363	0.747698	0.524203	1.06648
		rs55858165	-0.112726	0.12967	0.384665	-0.36688	0.141427	0.893395	0.692893	1.15192
		rs57466170	-0.0607393	0.225244	0.787422	-0.502217	0.380739	0.941069	0.605187	1.46337
		rs6445851	-0.0782664	0.182013	0.667192	-0.435012	0.278479	0.924718	0.647257	1.32112
		rs6930661	-0.6188	0.187996	0.000996368	-0.987273	-0.250327	0.53859	0.372591	0.778546
		rs75326254	-0.130466	0.178247	0.464205	-0.479831	0.218898	0.877686	0.618888	1.2447
		rs78753150	0.0960045	0.15037	0.523177	-0.19872	0.390729	1.10076	0.819779	1.47806
		rs9300744	-0.247334	0.194674	0.203905	-0.628894	0.134226	0.78088	0.533181	1.14365
		All - Inverse variance weighted	-0.105574	0.0420502	0.0120505	-0.187992	-0.0231555	0.899808	0.828621	0.977111
		All - MR Egger	-0.0934489	0.124474	0.464419	-0.337418	0.15052	0.910785	0.71361	1.16244
	RuminococcaceaeUCG011	SNP	b	se	p	lo_ci	up_ci	or	or_lci95	or_uci95
		rs10274562	-0.0737746	0.0813255	0.364327	-0.233173	0.0856234	0.928881	0.792017	1.0894
		rs12636310	-0.0331634	0.0761972	0.663395	-0.18251	0.116183	0.967381	0.833176	1.1232
		rs12724320	-0.18604	0.0746704	0.0127213	-0.332394	-0.0396857	0.830241	0.717205	0.961092
		rs1416041	0.0258045	0.0593186	0.663551	-0.0904598	0.142069	1.02614	0.913511	1.15266
		rs2729556	-0.16118	0.0807484	0.0459251	-0.319447	-0.00291352	0.851138	0.72655	0.997091
		rs4490371	-0.134539	0.0799453	0.0923958	-0.291232	0.0221534	0.874118	0.747342	1.0224
		rs79113084	-0.232547	0.0945102	0.0138726	-0.417787	-0.0473067	0.792513	0.658503	0.953795
		rs9729514	-0.0159594	0.0818651	0.845434	-0.176415	0.144496	0.984167	0.83827	1.15546
		All - Inverse variance weighted	-0.0862205	0.0327934	0.00855841	-0.150496	-0.0219456	0.917392	0.860282	0.978293
		All - MR Egger	0.18052	0.137956	0.238579	-0.0898741	0.450915	1.19784	0.914046	1.56975
	unknowngenus.id.959	SNP	b	se	p	lo_ci	up_ci	or	or_lci95	or_uci95
		rs10892421	-0.0768919	0.0851332	0.366423	-0.243753	0.0899693	0.92599	0.783681	1.09414
		rs115909738	-0.112362	0.0846288	0.184277	-0.278234	0.0535107	0.893721	0.757119	1.05497
		rs11691923	-0.0413112	0.0950607	0.663869	-0.22763	0.145008	0.95953	0.796419	1.15605
		rs12261792	-0.326818	0.104812	0.00182001	-0.53225	-0.121386	0.721215	0.587282	0.885692
		rs1969793	-0.0780643	0.0918938	0.3956	-0.258176	0.102048	0.924905	0.772459	1.10744
		rs2199860	-0.153142	0.0819366	0.0616179	-0.313738	0.00745331	0.858008	0.73071	1.00748
		rs2317372	-0.0384235	0.0952262	0.686583	-0.225067	0.14822	0.962305	0.798463	1.15977
		rs2831909	-0.0684221	0.101386	0.499759	-0.267139	0.130294	0.933866	0.765567	1.13916
		rs474008	0.00552261	0.100101	0.956003	-0.190676	0.201721	1.00554	0.8264	1.22351
		rs4766410	-0.0669265	0.10189	0.511275	-0.26663	0.132777	0.935264	0.765956	1.142
		rs56210598	0.0754868	0.0857794	0.378854	-0.0926409	0.243614	1.07841	0.911521	1.27585
		rs66473610	-0.0620999	0.0738669	0.400517	-0.206879	0.0826793	0.939789	0.813118	1.08619
		rs75285799	0.0908214	0.0909304	0.317891	-0.0874021	0.269045	1.09507	0.916309	1.30871
		rs9534068	-0.033156	0.0914848	0.717037	-0.212466	0.146154	0.967388	0.808588	1.15737
		All - Inverse variance weighted	-0.0605649	0.0251814	0.0161662	-0.10992	-0.0112093	0.941233	0.895905	0.988853
		All - MR Egger	-0.0918108	0.149235	0.549906	-0.384312	0.20069	0.912278	0.680919	1.22225
Lower back pain or/and sciatica	Prevotellaceae.id.960	SNP	b	se	p	lo_ci	up_ci	or	or_lci95	or_uci95
		rs10131942	0.110685	0.143074	0.439155	-0.169739	0.391109	1.11704	0.843885	1.47862
		rs12057990	0.129498	0.14042	0.356414	-0.145726	0.404722	1.13826	0.864395	1.49889
		rs12118202	0.139802	0.127536	0.273002	-0.110169	0.389772	1.15005	0.895683	1.47664
		rs13069367	0.165287	0.139757	0.236941	-0.108638	0.439211	1.17973	0.897055	1.55148
		rs148376875	-0.0879844	0.122097	0.471148	-0.327294	0.151325	0.915775	0.720872	1.16337
		rs2206482	0.272753	0.132953	0.0402184	0.012165	0.533341	1.31358	1.01224	1.70462
		rs2278540	0.0377522	0.138621	0.785359	-0.233944	0.309448	1.03847	0.791406	1.36267
		rs34071565	-0.00500166	0.0967984	0.958791	-0.194726	0.184723	0.995011	0.82306	1.20289
		rs34660375	0.107731	0.12995	0.407094	-0.146971	0.362433	1.11375	0.863319	1.43682
		rs3758087	-0.117136	0.146988	0.425502	-0.405233	0.17096	0.889464	0.666822	1.18644
		rs3860225	0.107791	0.1531	0.481398	-0.192285	0.407867	1.11381	0.825072	1.50361
		rs4493272	-0.0509787	0.122465	0.677211	-0.29101	0.189052	0.950299	0.747509	1.2081
		rs4685827	0.250001	0.127387	0.0497001	0.000323047	0.499679	1.28403	1.00032	1.64819
		rs7252711	-0.348986	0.16087	0.0300555	-0.664292	-0.0336796	0.705403	0.514638	0.966881
		rs7975087	-0.10129	0.163279	0.53503	-0.421317	0.218738	0.903671	0.656182	1.2445
		rs912860	0.00463252	0.108344	0.965895	-0.207722	0.216987	1.00464	0.812433	1.24233
		rs9586501	0.352939	0.141734	0.0127687	0.0751408	0.630736	1.42324	1.07804	1.87899
		rs9958960	0.358282	0.112842	0.00149802	0.137111	0.579453	1.43087	1.14696	1.78506
		All - Inverse variance weighted	0.0814223	0.0401286	0.0424545	0.00277035	0.160074	1.08483	1.00277	1.1736
		All - MR Egger	0.000713154	0.131674	0.995746	-0.257368	0.258795	1.00071	0.773083	1.29537
	Eubacteriumfissicatenagr	SNP	b	se	p	lo_ci	up_ci	or	or_lci95	or_uci95
		rs10147907	0.0444494	0.081764	0.586696	-0.115808	0.204707	1.04545	0.890646	1.22717
		rs11818408	0.0846695	0.0716148	0.23709	-0.0556954	0.225035	1.08836	0.945827	1.25237
		rs11876297	-0.0130036	0.063475	0.83768	-0.137415	0.111407	0.987081	0.871609	1.11785
		rs151257695	0.179156	0.0687338	0.0091468	0.0444376	0.313874	1.19621	1.04544	1.36872
		rs1768152	0.197172	0.086782	0.0230845	0.0270789	0.367264	1.21795	1.02745	1.44378
		rs2733072	-0.0182717	0.0676717	0.787156	-0.150908	0.114365	0.981894	0.859927	1.12116
		rs3771393	0.108054	0.071421	0.130302	-0.0319314	0.248039	1.11411	0.968573	1.28151
		rs6934739	0.07273	0.0704149	0.301661	-0.0652832	0.210743	1.07544	0.936802	1.2346
		rs7104872	-0.0552985	0.0863513	0.521919	-0.224547	0.11395	0.946203	0.798878	1.1207
		All - Inverse variance weighted	0.064287	0.0279641	0.0215102	0.00947724	0.119097	1.0664	1.00952	1.12648
		All - MR Egger	0.230355	0.141171	0.146753	-0.04634	0.50705	1.25905	0.954717	1.66039
	Collinsella.id.815	SNP	b	se	p	lo_ci	up_ci	or	or_lci95	or_uci95
		rs10890671	-0.0869184	0.138842	0.5313	-0.35905	0.185213	0.916752	0.69834	1.20347
		rs11597285	-0.191926	0.140387	0.171587	-0.467085	0.0832324	0.825368	0.626827	1.08679
		rs12921100	-0.23763	0.148083	0.108558	-0.527873	0.0526131	0.788494	0.589858	1.05402
		rs1496626	-0.198985	0.150781	0.186937	-0.494515	0.0965457	0.819562	0.609867	1.10136
		rs149807560	-0.0196695	0.140292	0.888498	-0.294641	0.255302	0.980523	0.744799	1.29085
		rs2103510	-0.0605803	0.146578	0.679389	-0.347873	0.226712	0.941218	0.706189	1.25447
		rs2671662	-0.100332	0.13099	0.443706	-0.357073	0.156409	0.904537	0.699722	1.1693
		rs59414781	-0.0835066	0.164286	0.611242	-0.405506	0.238493	0.919885	0.666639	1.26934
		rs62448871	-0.218266	0.138621	0.115359	-0.489962	0.0534307	0.803912	0.61265	1.05488
		rs73052258	-0.0973088	0.148812	0.513175	-0.388981	0.194363	0.907276	0.677747	1.21454
		rs75672793	-0.104788	0.162769	0.519713	-0.423815	0.214238	0.900515	0.654545	1.23892
		rs9541268	-0.0223859	0.134857	0.868159	-0.286705	0.241933	0.977863	0.750733	1.27371
		All - Inverse variance weighted	-0.117491	0.0417096	0.0048493	-0.199242	-0.03574	0.889149	0.819352	0.964891
		All - MR Egger	0.0696157	0.171644	0.693592	-0.266807	0.406039	1.0721	0.765821	1.50086
	Olsenella.id.822	SNP	b	se	p	lo_ci	up_ci	or	or_lci95	or_uci95
		rs1035588	0.00709195	0.0708006	0.920211	-0.131677	0.145861	1.00712	0.876624	1.15704
		rs17148768	-0.0511098	0.0706632	0.469504	-0.18961	0.0873901	0.950174	0.827282	1.09132
		rs2759329	0.032182	0.06893	0.640586	-0.102921	0.167285	1.03271	0.902198	1.18209
		rs35225860	-0.0849141	0.0858327	0.322517	-0.253146	0.083318	0.918591	0.776354	1.08689
		rs61090148	-0.0244059	0.0713893	0.732448	-0.164329	0.115517	0.975889	0.848463	1.12245
		rs62112538	0.00596028	0.0592703	0.919899	-0.11021	0.12213	1.00598	0.895646	1.1299
		rs72691585	-0.114031	0.043322	0.00848389	-0.198943	-0.0291202	0.89223	0.819597	0.9713
		rs7540303	-0.225358	0.0710083	0.0015052	-0.364534	-0.0861814	0.798231	0.69452	0.917428
		rs8066522	-0.0776785	0.0740085	0.293907	-0.222735	0.0673782	0.925262	0.800327	1.0697
		rs9460691	-0.154215	0.0786776	0.0499858	-0.308423	-6.70858e-06	0.857088	0.734605	0.999993
		All - Inverse variance weighted	-0.0700287	0.0245737	0.00437544	-0.118193	-0.0218643	0.932367	0.888524	0.978373
		All - MR Egger	-0.0940908	0.0829262	0.28938	-0.256626	0.0684445	0.9102	0.773657	1.07084
	Oxalobacter.id.2978	SNP	b	se	p	lo_ci	up_ci	or	or_lci95	or_uci95
		rs10464997	0.0438228	0.0691321	0.526146	-0.0916761	0.179322	1.0448	0.912401	1.19641
		rs11108500	0.0801495	0.0665071	0.228154	-0.0502044	0.210503	1.08345	0.951035	1.2343
		rs111966731	0.0417601	0.062053	0.500963	-0.0798638	0.163384	1.04264	0.923242	1.17749
		rs12002250	-0.0355149	0.084229	0.673283	-0.200604	0.129574	0.965108	0.818237	1.13834
		rs1569853	0.159034	0.0819735	0.0523719	-0.00163424	0.319702	1.17238	0.998367	1.37672
		rs36057338	0.0383331	0.100605	0.703183	-0.158852	0.235518	1.03908	0.853122	1.26556
		rs3862635	0.16916	0.0749335	0.0239785	0.0222907	0.31603	1.18431	1.02254	1.37167
		rs4428215	-0.0147505	0.0650044	0.82049	-0.142159	0.112658	0.985358	0.867483	1.11925
		rs6000536	-0.0191432	0.0757549	0.800501	-0.167623	0.129336	0.981039	0.845673	1.13807
		rs6071435	0.0724138	0.0722708	0.316354	-0.069237	0.214065	1.0751	0.933106	1.2387
		rs6993398	0.166909	0.0750465	0.0261433	0.019818	0.314	1.18165	1.02002	1.36889
		rs736744	0.0743212	0.063334	0.240603	-0.0498134	0.198456	1.07715	0.951407	1.21952
		All - Inverse variance weighted	0.0636916	0.0208928	0.00229988	0.0227418	0.104641	1.06576	1.023	1.11031
		All - MR Egger	0.0319827	0.0919713	0.735239	-0.148281	0.212246	1.0325	0.862189	1.23645
	Ruminiclostridium6.id.113	SNP	b	se	p	lo_ci	up_ci	or	or_lci95	or_uci95
		rs10829821	0.185248	0.131925	0.160263	-0.0733258	0.443822	1.20352	0.929298	1.55865
		rs116969552	0.102371	0.1333	0.442501	-0.158896	0.363639	1.10779	0.853085	1.43855
		rs11992182	0.231895	0.142375	0.103363	-0.0471597	0.51095	1.26099	0.953935	1.66687
		rs1871858	0.170667	0.110421	0.122198	-0.045757	0.387091	1.1861	0.955274	1.47269
		rs2548459	0.0266486	0.135316	0.843878	-0.238571	0.291868	1.02701	0.787753	1.33893
		rs35362464	-0.15608	0.147622	0.290374	-0.445419	0.133258	0.85549	0.640556	1.14254
		rs61060922	0.0482425	0.130818	0.712295	-0.20816	0.304645	1.04943	0.812077	1.35614
		rs663262	0.165348	0.156487	0.290684	-0.141367	0.472063	1.1798	0.868171	1.6033
		rs67479537	0.173905	0.145916	0.233334	-0.112091	0.459901	1.18994	0.893963	1.58392
		rs71414120	-0.0129544	0.0835281	0.87675	-0.176669	0.150761	0.987129	0.838057	1.16272
		rs72991535	0.0729731	0.150125	0.62691	-0.221273	0.367219	1.0757	0.801498	1.44371
		rs73176030	-0.00525662	0.141988	0.970468	-0.283553	0.27304	0.994757	0.753103	1.31395
		rs77193512	0.040551	0.116287	0.727304	-0.187372	0.268474	1.04138	0.829135	1.30797
		rs792058	0.109962	0.135496	0.41705	-0.15561	0.375534	1.11624	0.855893	1.45577
		rs79968172	0.19207	0.135954	0.157727	-0.0743994	0.458539	1.21175	0.928301	1.58176
		rs9555756	-0.198027	0.165817	0.232381	-0.523029	0.126975	0.820348	0.592723	1.13539
		All - Inverse variance weighted	0.0708559	0.0324782	0.0291359	0.00719856	0.134513	1.07343	1.00722	1.14398
		All - MR Egger	0.0847262	0.0828679	0.323923	-0.0776949	0.247147	1.08842	0.925247	1.28037
	RuminococcaceaeUCG005	SNP	b	se	p	lo_ci	up_ci	or	or_lci95	or_uci95
		rs10873449	0.189983	0.142799	0.183381	-0.0899039	0.46987	1.20923	0.914019	1.59979
		rs10937802	0.167469	0.150489	0.265779	-0.127489	0.462427	1.18231	0.880303	1.58792
		rs10950694	0.363614	0.133484	0.00644897	0.101986	0.625242	1.43852	1.10737	1.8687
		rs114279581	-0.0176609	0.0954591	0.853221	-0.204761	0.169439	0.982494	0.814842	1.18464
		rs12288512	0.175684	0.129886	0.176182	-0.0788919	0.43026	1.19206	0.92414	1.53766
		rs12458218	0.00186772	0.142522	0.989544	-0.277476	0.281211	1.00187	0.757694	1.32473
		rs2893871	-0.11641	0.160206	0.467453	-0.430414	0.197593	0.89011	0.65024	1.21847
		rs34781347	0.0704037	0.0755763	0.351565	-0.0777259	0.218533	1.07294	0.925218	1.24425
		rs35166120	0.088947	0.129762	0.493051	-0.165386	0.34328	1.09302	0.847567	1.40956
		rs394449	0.0417556	0.159787	0.793846	-0.271428	0.354939	1.04264	0.762291	1.42609
		rs55793120	0.0958677	0.129482	0.459063	-0.157918	0.349653	1.10061	0.85392	1.41858
		rs60081663	0.105862	0.136667	0.438575	-0.162004	0.373729	1.11167	0.850437	1.45314
		rs72776570	-0.0670334	0.143004	0.639246	-0.347321	0.213254	0.935164	0.706579	1.2377
		rs7449320	-0.143545	0.146366	0.326727	-0.430424	0.143333	0.866281	0.650234	1.15411
		rs7555878	-0.0950568	0.145916	0.514756	-0.381051	0.190938	0.909321	0.683143	1.21038
		rs7586445	-0.0408495	0.141133	0.772244	-0.317469	0.23577	0.959974	0.727989	1.26588
		rs898577	0.142108	0.129429	0.272224	-0.111574	0.39579	1.1527	0.894425	1.48556
		All - Inverse variance weighted	0.0609777	0.0309227	0.0486166	0.000369186	0.121586	1.06288	1.00037	1.12929
		All - MR Egger	0.0430364	0.0854371	0.621775	-0.12442	0.210493	1.04398	0.883009	1.23429
	RuminococcaceaeUCG011	SNP	b	se	p	lo_ci	up_ci	or	or_lci95	or_uci95
		rs10274562	-0.024253	0.068604	0.723697	-0.158717	0.110211	0.976039	0.853238	1.11651
		rs12636310	0.0365301	0.064258	0.569702	-0.0894156	0.162476	1.03721	0.914465	1.17642
		rs12724320	-0.161929	0.0629672	0.0101218	-0.285345	-0.0385134	0.850501	0.751755	0.962219
		rs1416041	-0.0277369	0.0499258	0.57851	-0.125591	0.0701177	0.972644	0.881975	1.07263
		rs2729556	-0.0855475	0.0680891	0.208969	-0.219002	0.0479072	0.918009	0.80332	1.04907
		rs4490371	-0.0796786	0.0674092	0.2372	-0.211801	0.0524434	0.923413	0.809126	1.05384
		rs79113084	-0.110773	0.0797999	0.165097	-0.267181	0.0456351	0.895142	0.765535	1.04669
		rs9729514	0.00404876	0.0690178	0.953221	-0.131226	0.139324	1.00406	0.877019	1.1495
		All - Inverse variance weighted	-0.0527567	0.0228767	0.0211031	-0.097595	-0.00791842	0.948611	0.907016	0.992113
		All - MR Egger	0.063319	0.114356	0.599795	-0.160819	0.287457	1.06537	0.851446	1.33303
	Tyzzerella3.id.11335	SNP	b	se	p	lo_ci	up_ci	or	or_lci95	or_uci95
		rs10898797	0.0911013	0.0971047	0.348154	-0.0992239	0.281427	1.09538	0.90554	1.32502
		rs112102233	0.0186302	0.0816558	0.819525	-0.141415	0.178676	1.0188	0.868129	1.19563
		rs1232220	0.113745	0.085855	0.185221	-0.0545309	0.282021	1.12047	0.946929	1.32581
		rs17706273	0.0172132	0.0987502	0.861621	-0.176337	0.210764	1.01736	0.838335	1.23462
		rs17809157	0.142858	0.0714042	0.0454246	0.00290622	0.282811	1.15357	1.00291	1.32685
		rs191093	-0.0119168	0.0755483	0.874664	-0.159992	0.136158	0.988154	0.852151	1.14586
		rs4904512	0.060069	0.0938849	0.522292	-0.123945	0.244083	1.06191	0.883428	1.27645
		rs55799124	0.0623624	0.0734401	0.395792	-0.0815801	0.206305	1.06435	0.921659	1.22913
		rs67476743	0.0287416	0.0633117	0.649851	-0.0953493	0.152832	1.02916	0.909055	1.16513
		rs7019909	0.0600381	0.0786866	0.445462	-0.0941876	0.214264	1.06188	0.910112	1.23895
		rs7333521	0.00608572	0.101956	0.952403	-0.193748	0.205919	1.0061	0.823866	1.22865
		rs75091807	0.0980433	0.0835196	0.240437	-0.0656551	0.261742	1.10301	0.936454	1.29919
		rs7561370	-0.0869073	0.0788382	0.27031	-0.24143	0.0676156	0.916762	0.785504	1.06995
		All - Inverse variance weighted	0.0463017	0.0224968	0.0395758	0.00220804	0.0903953	1.04739	1.00221	1.09461
		All - MR Egger	0.0616184	0.12751	0.638397	-0.188301	0.311538	1.06356	0.828365	1.36552
	unknowngenus.id.959	SNP	b	se	p	lo_ci	up_ci	or	or_lci95	or_uci95
		rs10892421	0.0092054	0.0718457	0.898048	-0.131612	0.150023	1.00925	0.876681	1.16186
		rs115909738	-0.131888	0.0713578	0.0645651	-0.271749	0.0079737	0.876439	0.762046	1.00801
		rs11691923	-0.0262593	0.0802197	0.74341	-0.18349	0.130971	0.974083	0.83236	1.13994
		rs12261792	-0.273224	0.0885613	0.00203456	-0.446804	-0.099644	0.760922	0.639669	0.90516
		rs1969793	-0.0159911	0.077523	0.836576	-0.167936	0.135954	0.984136	0.845408	1.14563
		rs2199860	-0.169826	0.0690627	0.0139322	-0.305189	-0.0344627	0.843812	0.736984	0.966124
		rs2317372	0.00182178	0.0802874	0.981897	-0.155542	0.159185	1.00182	0.855952	1.17255
		rs2831909	-0.0580746	0.0854396	0.496684	-0.225536	0.109387	0.94358	0.798088	1.11559
		rs474008	-0.0276225	0.0844498	0.743601	-0.193144	0.137899	0.972755	0.824363	1.14786
		rs4766410	-0.0347168	0.085956	0.686293	-0.203191	0.133757	0.965879	0.816123	1.14311
		rs56210598	0.0823442	0.072275	0.25457	-0.0593147	0.224003	1.08583	0.94241	1.25107
		rs66473610	-0.0539413	0.0624201	0.387497	-0.176285	0.0684022	0.947488	0.838379	1.0708
		rs75285799	0.0292971	0.0767442	0.702647	-0.121122	0.179716	1.02973	0.885926	1.19688
		rs9534068	-0.0477003	0.0771809	0.536554	-0.198975	0.103574	0.95342	0.819571	1.10913
		All - Inverse variance weighted	-0.0493899	0.0230483	0.0321223	-0.0945647	-0.00421521	0.95181	0.909769	0.995794
		All - MR Egger	-0.157583	0.133231	0.259799	-0.418716	0.103549	0.854206	0.657891	1.1091
	Firmicutes.id.1672	SNP	b	se	p	lo_ci	up_ci	or	or_lci95	or_uci95
		rs112334273	-0.00413739	0.131981	0.974992	-0.262821	0.254546	0.995871	0.76888	1.28988
		rs12554342	-0.20293	0.172139	0.238449	-0.540323	0.134463	0.816335	0.58256	1.14392
		rs13421739	-0.0835318	0.155047	0.590059	-0.387424	0.220361	0.919862	0.678803	1.24653
		rs2273429	-0.117515	0.171453	0.493089	-0.453562	0.218533	0.889128	0.635361	1.24425
		rs2332027	-0.0808192	0.158463	0.610038	-0.391407	0.229769	0.92236	0.676105	1.25831
		rs2547978	0.15615	0.164443	0.34233	-0.166158	0.478458	1.169	0.846913	1.61358
		rs3792064	-0.0802182	0.18661	0.667289	-0.445973	0.285537	0.922915	0.640201	1.33048
		rs3852931	0.166447	0.161057	0.301386	-0.149225	0.482119	1.1811	0.861375	1.6195
		rs4750583	-0.154232	0.154283	0.31747	-0.456626	0.148162	0.857073	0.633417	1.1597
		rs56199908	-0.176508	0.0888359	0.0469336	-0.350626	-0.00238959	0.838192	0.704247	0.997613
		rs6814436	-0.230179	0.156418	0.141137	-0.536757	0.0763993	0.794391	0.584641	1.07939
		rs6815608	-0.114645	0.110078	0.297647	-0.330398	0.101107	0.891682	0.718638	1.1064
		rs7247191	-0.0733899	0.172728	0.67092	-0.411937	0.265158	0.929238	0.662366	1.30364
		rs72738886	-0.303508	0.16245	0.0617182	-0.621911	0.0148943	0.738224	0.536917	1.01501
		rs72771021	0.0742951	0.103535	0.473015	-0.128634	0.277224	1.07712	0.879296	1.31946
		rs7573799	-0.0840172	0.146644	0.56669	-0.37144	0.203405	0.919415	0.689741	1.22557
		rs7975768	-0.0883788	0.145107	0.542486	-0.372789	0.196032	0.915414	0.68881	1.21657
		rs8085381	-0.00554673	0.1483	0.970164	-0.296214	0.28512	0.994469	0.743628	1.32992
		All - Inverse variance weighted	-0.0782581	0.0332021	0.0184221	-0.143334	-0.013182	0.924726	0.866465	0.986904
		All - MR Egger	-0.159517	0.091894	0.101798	-0.339629	0.020595	0.852555	0.712034	1.02081
Atypical facial pain	unknownfamily.id.1000006	SNP	b	se	p	lo_ci	up_ci	or	or_lci95	or_uci95
		rs11251024	-0.0748239	0.420079	0.85863	-0.898179	0.748531	0.927907	0.407311	2.11389
		rs11606187	-0.21163	0.352411	0.54816	-0.902356	0.479096	0.809264	0.405613	1.61461
		rs13219468	-0.31302	0.369034	0.396319	-1.03633	0.410287	0.731235	0.354755	1.50725
		rs13385922	0.560145	0.435718	0.198593	-0.293861	1.41415	1.75093	0.74538	4.113
		rs166849	-0.472081	0.427638	0.269625	-1.31025	0.366089	0.623703	0.269752	1.44208
		rs2172426	-0.420773	0.384633	0.273973	-1.17465	0.333108	0.656539	0.308926	1.3953
		rs267959	-0.0183547	0.434159	0.966278	-0.869307	0.832597	0.981813	0.419242	2.29928
		rs2930903	-0.58578	0.440461	0.183543	-1.44908	0.277524	0.556672	0.234785	1.31986
		rs4383094	-0.555108	0.370865	0.134448	-1.282	0.171788	0.57401	0.277481	1.18743
		rs55921101	-0.633694	0.413188	0.125111	-1.44354	0.176154	0.530628	0.23609	1.19262
		rs60775321	-0.0133059	0.439249	0.975834	-0.874233	0.847621	0.986782	0.417182	2.33409
		rs72671304	-0.287343	0.424822	0.498797	-1.11999	0.545309	0.750255	0.326282	1.72514
		rs7911787	0.359992	0.488299	0.460978	-0.597074	1.31706	1.43332	0.55042	3.73242
		rs8126061	0.119259	0.365192	0.743997	-0.596518	0.835036	1.12666	0.550726	2.3049
		rs9542068	-0.939868	0.41044	0.022027	-1.74433	-0.135405	0.390679	0.174762	0.873362
		All - Inverse variance weighted	-0.24976	0.10512	0.0175035	-0.455795	-0.0437253	0.778988	0.633944	0.957217
		All - MR Egger	0.0918677	0.463849	0.846065	-0.817277	1.00101	1.09622	0.441633	2.72103
	Anaerofilum.id.2053	SNP	b	se	p	lo_ci	up_ci	or	or_lci95	or_uci95
		rs10794359	0.349233	0.407938	0.391947	-0.450326	1.14879	1.41798	0.63742	3.15438
		rs1563175	-0.0455633	0.416992	0.912991	-0.862867	0.77174	0.955459	0.421951	2.16353
		rs17012738	0.318424	0.425094	0.453816	-0.514759	1.15161	1.37496	0.597644	3.16328
		rs17096874	0.844195	0.372749	0.0235262	0.113606	1.57478	2.32611	1.12031	4.8297
		rs17105491	-0.205978	0.413818	0.61866	-1.01706	0.605106	0.813851	0.361656	1.83145
		rs4244069	0.172679	0.393959	0.661156	-0.599481	0.94484	1.18848	0.549096	2.5724
		rs4506496	0.670325	0.410141	0.10218	-0.133552	1.4742	1.95487	0.874982	4.36755
		rs712981	0.0185874	0.390927	0.962077	-0.74763	0.784805	1.01876	0.473487	2.19198
		rs79598899	-0.359779	0.506981	0.477922	-1.35346	0.633905	0.697831	0.258344	1.88496
		rs816292	0.178734	0.374475	0.633155	-0.555238	0.912706	1.1957	0.573936	2.49105
		rs9299345	0.655683	0.475904	0.168276	-0.277089	1.58846	1.92646	0.757987	4.89618
		All - Inverse variance weighted	0.254419	0.124323	0.040713	0.0107466	0.498092	1.28971	1.0108	1.64558
		All - MR Egger	-0.143749	0.569386	0.806354	-1.25975	0.972247	0.866105	0.283726	2.64388
	Phascolarctobacterium	SNP	b	se	p	lo_ci	up_ci	or	or_lci95	or_uci95
		rs12618201	-0.930974	0.602566	0.122343	-2.112	0.250056	0.39417	0.120995	1.2841
		rs1264476	-0.246908	0.641702	0.700408	-1.50464	1.01083	0.781213	0.222096	2.74788
		rs28525131	-1.15865	0.753056	0.123903	-2.63464	0.317341	0.31391	0.0717449	1.37347
		rs56069061	-0.0730004	0.69416	0.916246	-1.43355	1.28755	0.9296	0.23846	3.62391
		rs56157888	-0.169539	0.486216	0.727321	-1.12252	0.783444	0.844054	0.325458	2.189
		rs6427992	-0.26057	0.608818	0.668656	-1.45385	0.932713	0.770612	0.233668	2.54139
		rs74540770	-1.10016	0.587389	0.0610733	-2.25144	0.0511237	0.332818	0.105248	1.05245
		rs75882962	-0.895783	0.598939	0.134754	-2.0697	0.278138	0.408288	0.126223	1.32067
		rs76124218	-0.444334	0.639241	0.486995	-1.69725	0.808579	0.641251	0.183187	2.24472
		rs7982713	-0.226492	0.590537	0.701322	-1.38394	0.93096	0.797326	0.250588	2.53694
		All - Inverse variance weighted	-0.526942	0.192629	0.00622804	-0.904494	-0.149389	0.590408	0.404747	0.861234
		All - MR Egger	-0.818813	0.749399	0.306366	-2.28763	0.65001	0.440955	0.101506	1.91556
	RuminococcaceaeUCG005	SNP	b	se	p	lo_ci	up_ci	or	or_lci95	or_uci95
		rs10873449	0.188149	0.744368	0.800451	-1.27081	1.64711	1.20701	0.280604	5.19195
		rs10937802	-0.0820062	0.7821	0.916492	-1.61492	1.45091	0.921266	0.198906	4.267
		rs10950694	-0.672844	0.693262	0.331773	-2.03164	0.68595	0.510255	0.131121	1.98566
		rs114279581	-0.0495815	0.496326	0.920426	-1.02238	0.923218	0.951628	0.359737	2.51738
		rs12288512	0.263912	0.674183	0.695461	-1.05749	1.58531	1.30201	0.347328	4.88081
		rs12458218	0.664197	0.739386	0.369021	-0.784999	2.11339	1.94293	0.45612	8.27627
		rs2893871	0.0710988	0.831225	0.931836	-1.5581	1.7003	1.07369	0.210535	5.47559
		rs34781347	0.663011	0.394246	0.0926235	-0.109711	1.43573	1.94063	0.896093	4.20272
		rs35166120	0.614662	0.674514	0.362155	-0.707386	1.93671	1.84903	0.492931	6.93589
		rs394449	1.20511	0.827021	0.14507	-0.415853	2.82607	3.33712	0.659777	16.879
		rs55793120	-0.379433	0.669809	0.571068	-1.69226	0.933392	0.684249	0.184103	2.54312
		rs60081663	1.5964	0.707129	0.0239715	0.210432	2.98238	4.93525	1.23421	19.7347
		rs72776570	-0.471438	0.742828	0.525655	-1.92738	0.984505	0.624104	0.145529	2.67649
		rs7449320	0.523508	0.759573	0.490688	-0.965254	2.01227	1.68794	0.380887	7.48028
		rs7555878	0.628889	0.75758	0.406466	-0.855968	2.11375	1.87553	0.424872	8.2792
		rs7586445	1.29107	0.732109	0.0778165	-0.143861	2.72601	3.63669	0.866008	15.2718
		rs898577	0.0911706	0.673845	0.892375	-1.22956	1.41191	1.09546	0.29242	4.10377
		All - Inverse variance weighted	0.361084	0.160675	0.0246214	0.0461606	0.676007	1.43488	1.04724	1.96601
		All - MR Egger	0.557278	0.44446	0.229093	-0.313864	1.42842	1.74591	0.730619	4.1721
	unknowngenus.id.100000616	SNP	b	se	p	lo_ci	up_ci	or	or_lci95	or_uci95
		rs11251024	-0.0748239	0.420079	0.85863	-0.898179	0.748531	0.927907	0.407311	2.11389
		rs11606187	-0.21163	0.352411	0.54816	-0.902356	0.479096	0.809264	0.405613	1.61461
		rs13219468	-0.31302	0.369034	0.396319	-1.03633	0.410287	0.731235	0.354755	1.50725
		rs13385922	0.560145	0.435718	0.198593	-0.293861	1.41415	1.75093	0.74538	4.113
		rs166849	-0.472081	0.427638	0.269625	-1.31025	0.366089	0.623703	0.269752	1.44208
		rs2172426	-0.420773	0.384633	0.273973	-1.17465	0.333108	0.656539	0.308926	1.3953
		rs267959	-0.0183547	0.434159	0.966278	-0.869307	0.832597	0.981813	0.419242	2.29928
		rs2930903	-0.58578	0.440461	0.183543	-1.44908	0.277524	0.556672	0.234785	1.31986
		rs4383094	-0.555108	0.370865	0.134448	-1.282	0.171788	0.57401	0.277481	1.18743
		rs55921101	-0.633694	0.413188	0.125111	-1.44354	0.176154	0.530628	0.23609	1.19262
		rs60775321	-0.0133059	0.439249	0.975834	-0.874233	0.847621	0.986782	0.417182	2.33409
		rs72671304	-0.287343	0.424822	0.498797	-1.11999	0.545309	0.750255	0.326282	1.72514
		rs7911787	0.359992	0.488299	0.460978	-0.597074	1.31706	1.43332	0.55042	3.73242
		rs8126061	0.119259	0.365192	0.743997	-0.596518	0.835036	1.12666	0.550726	2.3049
		rs9542068	-0.939868	0.41044	0.022027	-1.74433	-0.135405	0.390679	0.174762	0.873362
		All - Inverse variance weighted	-0.24976	0.10512	0.0175035	-0.455795	-0.0437253	0.778988	0.633944	0.957217
		All - MR Egger	0.0918677	0.463849	0.846065	-0.817277	1.00101	1.09622	0.441633	2.72103
	Bacteroidetes.id.905	SNP	b	se	p	lo_ci	up_ci	or	or_lci95	or_uci95
		rs13291169	0.681095	0.788768	0.387867	-0.86489	2.22708	1.97604	0.421098	9.27275
		rs17343978	1.24186	0.855423	0.14657	-0.434766	2.91849	3.46205	0.647416	18.5133
		rs2032750	0.199735	0.754607	0.79125	-1.27929	1.67876	1.22108	0.278233	5.35893
		rs62531359	0.878193	0.757225	0.24615	-0.605969	2.36235	2.40655	0.545546	10.6159
		rs62575403	0.474638	0.651848	0.466527	-0.802985	1.75226	1.60743	0.44799	5.76763
		rs6586324	0.30493	0.812106	0.707304	-1.2868	1.89666	1.35653	0.276154	6.66358
		rs72706335	-0.3318	0.548144	0.544969	-1.40616	0.742562	0.717631	0.245082	2.10131
		rs73512608	1.16732	0.69528	0.0931678	-0.19543	2.53007	3.21336	0.822481	12.5543
		rs73846128	0.92045	0.816409	0.259557	-0.67971	2.52061	2.51042	0.506764	12.4362
		rs73975615	-1.19085	1.09734	0.277826	-3.34164	0.959936	0.303962	0.035379	2.61153
		rs7546249	-0.0414682	0.738931	0.955247	-1.48977	1.40684	0.95938	0.225424	4.08302
		rs929878	1.63554	0.867254	0.0593101	-0.0642745	3.33536	5.13225	0.937748	28.0885
		All - Inverse variance weighted	0.473553	0.21702	0.0291047	0.0481927	0.898913	1.60569	1.04937	2.45693
		All - MR Egger	-0.130651	0.519123	0.806387	-1.14813	0.886829	0.877524	0.317229	2.42742
Pain (limb, back, neck, head abdominally)	Negativicutes.id.2164	SNP	b	se	p	lo_ci	up_ci	or	or_lci95	or_uci95
		rs1135612	-0.0156097	0.109661	0.886808	-0.230546	0.199326	0.984512	0.7941	1.22058
		rs13086907	-0.00732791	0.0907993	0.935677	-0.185295	0.170639	0.992699	0.83086	1.18606
		rs1447205	-0.0926318	0.0979892	0.344492	-0.284691	0.099427	0.911529	0.752247	1.10454
		rs1643968	-0.0406038	0.0869764	0.640616	-0.211078	0.12987	0.960209	0.809711	1.13868
		rs1649999	0.0947384	0.10709	0.37634	-0.115158	0.304635	1.09937	0.891225	1.35613
		rs2834062	0.0142348	0.105773	0.892945	-0.19308	0.221549	1.01434	0.824416	1.24801
		rs4463806	0.25213	0.110212	0.022156	0.0361145	0.468145	1.28676	1.03677	1.59703
		rs4722181	0.203118	0.094188	0.0310438	0.018509	0.387726	1.22522	1.01868	1.47363
		rs60274479	0.285375	0.0903583	0.00158713	0.108273	0.462477	1.33026	1.11435	1.588
		rs61249479	0.0536342	0.0838624	0.522465	-0.110736	0.218004	1.0551	0.895175	1.24359
		rs71405394	0.129924	0.0818355	0.112372	-0.0304739	0.290321	1.13874	0.969986	1.33686
		rs73232831	0.0801686	0.0849878	0.34553	-0.0864075	0.246745	1.08347	0.91722	1.27985
		rs9423647	0.0579701	0.099219	0.559043	-0.136499	0.252439	1.05968	0.872407	1.28716
		All - Inverse variance weighted	0.0783887	0.0310336	0.0115394	0.0175627	0.139215	1.08154	1.01772	1.14937
		All - MR Egger	0.146995	0.111964	0.215954	-0.0724541	0.366443	1.15835	0.930108	1.44259
	Verrucomicrobiae.id.4029	SNP	b	se	p	lo_ci	up_ci	or	or_lci95	or_uci95
		rs11184341	-0.119001	0.080608	0.139866	-0.276992	0.0389909	0.887807	0.75806	1.03976
		rs111862613	-0.24168	0.0694362	0.000500288	-0.377775	-0.105585	0.785308	0.685385	0.899798
		rs117107102	0.0411942	0.0547515	0.45182	-0.0661188	0.148507	1.04205	0.93602	1.1601
		rs11729256	0.0472155	0.0838102	0.573188	-0.117052	0.211483	1.04835	0.889539	1.23551
		rs12908520	-0.0944622	0.0769537	0.219627	-0.245291	0.056367	0.909862	0.782476	1.05799
		rs2602429	0.0589306	0.0721445	0.414019	-0.0824726	0.200334	1.0607	0.920837	1.22181
		rs4242783	-0.000296365	0.0762842	0.9969	-0.149813	0.149221	0.999704	0.860869	1.16093
		rs4936098	-0.0177904	0.0762069	0.815413	-0.167156	0.131575	0.982367	0.846068	1.14062
		rs61779207	-0.110324	0.0749279	0.140912	-0.257183	0.0365345	0.895544	0.773227	1.03721
		rs74542928	-0.149624	0.0986255	0.129243	-0.34293	0.0436818	0.861032	0.709688	1.04465
		rs9349825	-0.0919005	0.085666	0.283371	-0.259806	0.0760048	0.912196	0.771201	1.07897
		rs941682	-0.0814081	0.0836484	0.330445	-0.245359	0.0825427	0.921817	0.782424	1.08605
		All - Inverse variance weighted	-0.0546573	0.0276595	0.0481462	-0.10887	-0.00044464	0.94681	0.896847	0.999555
		All - MR Egger	0.014889	0.0984892	0.882845	-0.17815	0.207928	1.015	0.836817	1.23112
	Prevotellaceae.id.960	SNP	b	se	p	lo_ci	up_ci	or	or_lci95	or_uci95
		rs10131942	0.0580449	0.0912058	0.524505	-0.120718	0.236808	1.05976	0.886284	1.2672
		rs12057990	0.00799677	0.0894828	0.928791	-0.16739	0.183383	1.00803	0.84587	1.20127
		rs12118202	-0.0987257	0.0814489	0.225467	-0.258365	0.0609141	0.905991	0.772313	1.06281
		rs13069367	0.156858	0.0891307	0.0784315	-0.0178386	0.331554	1.16983	0.98232	1.39313
		rs148376875	0.0327907	0.0778135	0.673462	-0.119724	0.185305	1.03333	0.887165	1.20359
		rs2206482	0.0612746	0.0847497	0.469676	-0.104835	0.227384	1.06319	0.900473	1.25531
		rs2278540	0.0829952	0.0884479	0.348064	-0.0903628	0.256353	1.08654	0.9136	1.29221
		rs34071565	0.0286889	0.0622356	0.644818	-0.0932929	0.150671	1.0291	0.910927	1.16261
		rs34660375	0.0848243	0.0830788	0.30725	-0.0780101	0.247659	1.08853	0.924955	1.28102
		rs3758087	0.048882	0.0936398	0.601655	-0.134652	0.232416	1.0501	0.87402	1.26164
		rs3860225	0.0981135	0.0978434	0.315976	-0.0936596	0.289887	1.10309	0.910593	1.33628
		rs4493272	-0.04419	0.0780833	0.571439	-0.197233	0.108853	0.956772	0.820999	1.115
		rs4685827	0.212215	0.0812348	0.00899192	0.0529944	0.371435	1.23641	1.05442	1.44981
		rs7252711	-0.0157114	0.102367	0.878019	-0.216351	0.184929	0.984411	0.805452	1.20313
		rs7975087	-0.126771	0.103826	0.222089	-0.330269	0.076728	0.880936	0.71873	1.07975
		rs912860	0.105699	0.0685857	0.123288	-0.0287293	0.240127	1.11149	0.971679	1.27141
		rs9586501	-0.0585178	0.0903727	0.517298	-0.235648	0.118613	0.943161	0.790058	1.12593
		rs9958960	0.0917108	0.0714943	0.199573	-0.0484182	0.23184	1.09605	0.952735	1.26092
		All - Inverse variance weighted	0.0451408	0.0195744	0.021104	0.00677505	0.0835066	1.04618	1.0068	1.08709
		All - MR Egger	0.0820252	0.0640617	0.218653	-0.0435357	0.207586	1.08548	0.957398	1.2307
	Verrucomicrobiaceae.id.4	SNP	b	se	p	lo_ci	up_ci	or	or_lci95	or_uci95
		rs11184341	-0.119008	0.0806131	0.139866	-0.27701	0.0389933	0.8878	0.758047	1.03976
		rs111862613	-0.24166	0.0694304	0.000500288	-0.377743	-0.105576	0.785323	0.685406	0.899806
		rs117107102	0.0411942	0.0547515	0.45182	-0.0661188	0.148507	1.04205	0.93602	1.1601
		rs11729256	0.0472155	0.0838102	0.573188	-0.117052	0.211483	1.04835	0.889539	1.23551
		rs12908520	-0.094435	0.0769315	0.219627	-0.245221	0.0563507	0.909887	0.782532	1.05797
		rs2602429	0.0590356	0.0722731	0.414019	-0.0826196	0.200691	1.06081	0.920701	1.22225
		rs4242783	-0.000296925	0.0764284	0.9969	-0.150096	0.149503	0.999703	0.860625	1.16126
		rs4936098	-0.0177946	0.0762247	0.815413	-0.167195	0.131606	0.982363	0.846035	1.14066
		rs61779207	-0.110251	0.0748783	0.140912	-0.257013	0.0365103	0.895609	0.773358	1.03719
		rs74542928	-0.149677	0.0986605	0.129243	-0.343052	0.0436973	0.860986	0.709602	1.04467
		rs9349825	-0.0918589	0.0856272	0.283371	-0.259688	0.0759705	0.912234	0.771292	1.07893
		rs941682	-0.0813965	0.0836365	0.330445	-0.245324	0.082531	0.921828	0.782451	1.08603
		All - Inverse variance weighted	-0.0547025	0.0276601	0.047966	-0.108916	-0.000488748	0.946767	0.896806	0.999511
		All - MR Egger	0.0144733	0.0984922	0.886093	-0.178571	0.207518	1.01458	0.836464	1.23062
	Eubacteriumfissicatenagr	SNP	b	se	p	lo_ci	up_ci	or	or_lci95	or_uci95
		rs10147907	0.0802797	0.0521708	0.123857	-0.0219751	0.182534	1.08359	0.978265	1.20026
		rs11818408	0.0801067	0.045658	0.0793456	-0.0093829	0.169596	1.0834	0.990661	1.18483
		rs11876297	-0.020443	0.0405278	0.613967	-0.0998776	0.0589915	0.979765	0.904948	1.06077
		rs151257695	0.114502	0.0439521	0.00918322	0.028356	0.200648	1.12131	1.02876	1.22219
		rs1768152	0.07431	0.0553453	0.179381	-0.0341667	0.182787	1.07714	0.96641	1.20056
		rs2733072	0.0371633	0.0431636	0.389245	-0.0474374	0.121764	1.03786	0.95367	1.12949
		rs3771393	-0.00992041	0.045517	0.827468	-0.0991337	0.0792929	0.990129	0.905622	1.08252
		rs6934739	-0.0153629	0.0449722	0.732645	-0.103508	0.0727826	0.984755	0.901669	1.0755
		rs7104872	0.00156359	0.0544473	0.97709	-0.105153	0.10828	1.00156	0.900187	1.11436
		All - Inverse variance weighted	0.0354349	0.0173388	0.0409857	0.00145082	0.069419	1.03607	1.00145	1.07189
		All - MR Egger	0.151406	0.0852665	0.119045	-0.0157169	0.318528	1.16347	0.984406	1.3751
	Eubacteriumnodatumgroup	SNP	b	se	p	lo_ci	up_ci	or	or_lci95	or_uci95
		rs10263623	0.00206391	0.0628468	0.973802	-0.121116	0.125244	1.00207	0.885931	1.13342
		rs10458299	-0.0386037	0.047746	0.41879	-0.132186	0.0549785	0.962132	0.876178	1.05652
		rs11006576	-0.113542	0.0430968	0.0084241	-0.198012	-0.0290723	0.892667	0.82036	0.971346
		rs113893692	-0.0560411	0.0389252	0.149949	-0.132335	0.0202524	0.9455	0.876048	1.02046
		rs34297067	-0.0595795	0.0356268	0.0944606	-0.129408	0.010249	0.942161	0.878615	1.0103
		rs61841040	0.00885668	0.0368836	0.810233	-0.0634351	0.0811485	1.0089	0.938535	1.08453
		rs6818880	0.0153892	0.0431466	0.721337	-0.0691781	0.0999565	1.01551	0.93316	1.10512
		rs77910827	-0.0188262	0.0377174	0.617682	-0.0927524	0.0550999	0.98135	0.911419	1.05665
		rs7827125	0.00661465	0.0429944	0.877729	-0.0776544	0.0908837	1.00664	0.925284	1.09514
		rs7880204	-0.0105736	0.0436528	0.808609	-0.0961331	0.0749859	0.989482	0.908343	1.07787
		rs9425984	-0.0138145	0.0438014	0.752465	-0.0996652	0.0720361	0.98628	0.90514	1.07469
		All - Inverse variance weighted	-0.0270978	0.012659	0.0323063	-0.0519095	-0.00228622	0.973266	0.949415	0.997716
		All - MR Egger	-0.0364587	0.0564042	0.534166	-0.147011	0.0740936	0.964198	0.863284	1.07691
	Akkermansia.id.4037	SNP	b	se	p	lo_ci	up_ci	or	or_lci95	or_uci95
		rs11184341	-0.118908	0.080545	0.139866	-0.276776	0.0389604	0.88789	0.758224	1.03973
		rs111862613	-0.240563	0.0691154	0.000500288	-0.376029	-0.105097	0.786185	0.686582	0.900237
		rs117107102	0.0412499	0.0548256	0.45182	-0.0662083	0.148708	1.04211	0.935936	1.16033
		rs11729256	0.0471731	0.0837348	0.573188	-0.116947	0.211293	1.0483	0.889632	1.23527
		rs12908520	-0.0946466	0.0771038	0.219627	-0.24577	0.056477	0.909694	0.782102	1.0581
		rs2602429	0.0590486	0.0722889	0.414019	-0.0826377	0.200735	1.06083	0.920685	1.2223
		rs4242783	-0.000298024	0.0767114	0.9969	-0.150652	0.150056	0.999702	0.860147	1.1619
		rs4936098	-0.01778	0.076162	0.815413	-0.167058	0.131498	0.982377	0.846151	1.14054
		rs61779207	-0.110001	0.0747082	0.140912	-0.256429	0.0364274	0.895833	0.77381	1.0371
		rs74542928	-0.149014	0.0982235	0.129243	-0.341532	0.0435038	0.861557	0.71068	1.04446
		rs9349825	-0.0919826	0.0857425	0.283371	-0.260038	0.0760728	0.912121	0.771022	1.07904
		rs941682	-0.0812124	0.0834473	0.330445	-0.244769	0.0823443	0.921998	0.782885	1.08583
		All - Inverse variance weighted	-0.0548237	0.027623	0.0471764	-0.108965	-0.000682638	0.946652	0.896762	0.999318
		All - MR Egger	0.0127113	0.0984608	0.899838	-0.180272	0.205695	1.01279	0.835043	1.22838
	Olsenella.id.822	SNP	b	se	p	lo_ci	up_ci	or	or_lci95	or_uci95
		rs1035588	0.0508633	0.0451809	0.260263	-0.0376913	0.139418	1.05218	0.96301	1.1496
		rs17148768	-0.0976294	0.0450608	0.0302641	-0.185948	-0.00931029	0.906985	0.830316	0.990733
		rs2759329	0.0322318	0.0439645	0.463479	-0.0539387	0.118402	1.03276	0.94749	1.1257
		rs35225860	-0.0399191	0.0542411	0.461757	-0.146232	0.0663934	0.960867	0.863958	1.06865
		rs61090148	-0.00196505	0.0455228	0.965569	-0.0911897	0.0872596	0.998037	0.912845	1.09118
		rs62112538	-0.010085	0.0379881	0.790642	-0.0845417	0.0643717	0.989966	0.918933	1.06649
		rs72691585	-0.0717291	0.0278684	0.0100575	-0.126351	-0.0171069	0.930783	0.881305	0.983039
		rs7540303	-0.0745608	0.0452057	0.0990728	-0.163164	0.0140425	0.928151	0.849452	1.01414
		rs8066522	-0.08765	0.0472081	0.0633579	-0.180178	0.00487793	0.916081	0.835122	1.00489
		rs9460691	-0.00837197	0.0500923	0.867267	-0.106553	0.0898089	0.991663	0.898928	1.09397
		All - Inverse variance weighted	-0.0353773	0.0159275	0.0263406	-0.0665951	-0.0041595	0.965241	0.935574	0.995849
		All - MR Egger	-0.0885447	0.0504656	0.117416	-0.187457	0.0103679	0.915262	0.829064	1.01042
	Oscillibacter.id.2063	SNP	b	se	p	lo_ci	up_ci	or	or_lci95	or_uci95
		rs11627628	0.0352751	0.0620679	0.56981	-0.086378	0.156928	1.0359	0.917247	1.16991
		rs11990279	0.102814	0.0715757	0.150878	-0.0374744	0.243102	1.10829	0.963219	1.2752
		rs12417956	-0.0640824	0.0670221	0.339002	-0.195446	0.0672808	0.937928	0.822468	1.0696
		rs12649930	-0.00847521	0.0642882	0.895118	-0.13448	0.11753	0.991561	0.87417	1.12472
		rs133832	-0.0326316	0.0660381	0.621213	-0.162066	0.0968031	0.967895	0.850385	1.10164
		rs137917150	-0.128173	0.0471613	0.00657271	-0.220609	-0.0357365	0.879702	0.80203	0.964894
		rs16866406	-0.112157	0.0662581	0.0905069	-0.242023	0.0177088	0.893904	0.785038	1.01787
		rs16934185	-0.0905319	0.0599473	0.130995	-0.208029	0.0269649	0.913445	0.812184	1.02733
		rs234108	0.0259041	0.0641121	0.68618	-0.0997556	0.151564	1.02624	0.905059	1.16365
		rs36095275	0.000723408	0.0638214	0.990956	-0.124367	0.125813	1.00072	0.883056	1.13407
		rs4506202	0.0640134	0.0666628	0.336926	-0.0666457	0.194672	1.06611	0.935527	1.21491
		rs61883564	-0.0773303	0.0677656	0.25381	-0.210151	0.0554903	0.925584	0.810462	1.05706
		rs6901560	0.0199384	0.0707633	0.778126	-0.118758	0.158635	1.02014	0.888023	1.17191
		rs75453768	-0.0390614	0.0654068	0.550369	-0.167259	0.0891359	0.961692	0.845981	1.09323
		rs761240	-0.0479128	0.0630295	0.447156	-0.171451	0.075625	0.953217	0.842442	1.07856
		rs9393920	-0.149184	0.0651107	0.0219494	-0.276801	-0.0215674	0.86141	0.758205	0.978664
		All - Inverse variance weighted	-0.0382352	0.0178733	0.0324162	-0.0732668	-0.00320362	0.962487	0.929353	0.996802
		All - MR Egger	-0.123793	0.0604452	0.0597971	-0.242265	-0.00532001	0.883563	0.784848	0.994694
	unknowngenus.id.2041	SNP	b	se	p	lo_ci	up_ci	or	or_lci95	or_uci95
		rs11941716	0.0357155	0.0655345	0.585761	-0.0927321	0.164163	1.03636	0.911438	1.17841
		rs16843660	0.00997557	0.0574097	0.862053	-0.102547	0.122499	1.01003	0.902535	1.13032
		rs1962916	-0.0156808	0.066252	0.812902	-0.145535	0.114173	0.984441	0.86456	1.12095
		rs2336448	-0.126046	0.0609641	0.0386835	-0.245535	-0.00655596	0.881575	0.782286	0.993465
		rs249459	0.0292474	0.0673374	0.664041	-0.102734	0.161229	1.02968	0.902367	1.17495
		rs2646833	-0.17434	0.0713729	0.0145795	-0.314231	-0.0344487	0.840012	0.730351	0.966138
		rs2651663	0.00994597	0.0636907	0.875906	-0.114888	0.13478	1.01	0.891466	1.14428
		rs35703006	-0.0391213	0.0594353	0.510399	-0.155615	0.077372	0.961634	0.855889	1.08044
		rs553072	-0.108457	0.0559529	0.0525789	-0.218125	0.00121063	0.897217	0.804025	1.00121
		rs6514318	-0.147035	0.0864414	0.0889464	-0.316461	0.0223899	0.863264	0.728724	1.02264
		rs7187855	-0.102404	0.0567107	0.0709607	-0.213557	0.00874881	0.902665	0.807706	1.00879
		rs921383	0.0421839	0.0670546	0.529285	-0.0892431	0.173611	1.04309	0.914623	1.18959
		All - Inverse variance weighted	-0.0469697	0.0214656	0.0286598	-0.0890423	-0.00489706	0.954116	0.914807	0.995115
		All - MR Egger	-0.0915476	0.0712518	0.227808	-0.231201	0.0481059	0.912518	0.79358	1.04928
	Clostridiales.id.1863	SNP	b	se	p	lo_ci	up_ci	or	or_lci95	or_uci95
		rs10209007	-0.00154296	0.13357	0.990783	-0.263341	0.260255	0.998458	0.76848	1.29726
		rs10774377	-0.0261536	0.0914939	0.774993	-0.205482	0.153174	0.974185	0.814255	1.16553
		rs112334273	-0.151458	0.0825918	0.0666821	-0.313337	0.0104222	0.859454	0.731003	1.01048
		rs13105690	-0.12652	0.0997413	0.204627	-0.322013	0.0689731	0.881157	0.724689	1.07141
		rs13179700	-0.0417491	0.0972933	0.667847	-0.232444	0.148946	0.95911	0.792594	1.16061
		rs1842454	-0.0125725	0.111245	0.910018	-0.230613	0.205468	0.987506	0.794046	1.2281
		rs2273429	-0.0126346	0.105808	0.90495	-0.220018	0.194749	0.987445	0.802504	1.21501
		rs6442336	-0.0413286	0.0993236	0.677336	-0.236003	0.153346	0.959514	0.789778	1.16573
		rs6814436	-0.165762	0.0911551	0.0689932	-0.344426	0.0129017	0.847248	0.708627	1.01299
		rs6815608	-0.182725	0.0632934	0.00388988	-0.30678	-0.0586702	0.832997	0.735812	0.943018
		rs6934062	-0.0779139	0.0968881	0.421303	-0.267815	0.111987	0.925044	0.76505	1.1185
		rs7269302	-0.101027	0.103014	0.326732	-0.302935	0.10088	0.903908	0.738647	1.10614
		rs72738886	-0.0555942	0.103181	0.590025	-0.25783	0.146641	0.945923	0.772727	1.15794
		rs76860606	0.0616466	0.0893159	0.490063	-0.113413	0.236706	1.06359	0.892782	1.26707
		All - Inverse variance weighted	-0.0816164	0.0250803	0.0011371	-0.130774	-0.032459	0.921625	0.877416	0.968062
		All - MR Egger	-0.151824	0.0996456	0.15351	-0.347129	0.0434818	0.85914	0.706714	1.04444
	Selenomonadales.id.2165	SNP	b	se	p	lo_ci	up_ci	or	or_lci95	or_uci95
		rs1135612	-0.0156097	0.109661	0.886808	-0.230546	0.199326	0.984512	0.7941	1.22058
		rs13086907	-0.00732791	0.0907993	0.935677	-0.185295	0.170639	0.992699	0.83086	1.18606
		rs1447205	-0.0926318	0.0979892	0.344492	-0.284691	0.099427	0.911529	0.752247	1.10454
		rs1643968	-0.0406038	0.0869764	0.640616	-0.211078	0.12987	0.960209	0.809711	1.13868
		rs1649999	0.0947384	0.10709	0.37634	-0.115158	0.304635	1.09937	0.891225	1.35613
		rs2834062	0.0142348	0.105773	0.892945	-0.19308	0.221549	1.01434	0.824416	1.24801
		rs4463806	0.25213	0.110212	0.022156	0.0361145	0.468145	1.28676	1.03677	1.59703
		rs4722181	0.203118	0.094188	0.0310438	0.018509	0.387726	1.22522	1.01868	1.47363
		rs60274479	0.285375	0.0903583	0.00158713	0.108273	0.462477	1.33026	1.11435	1.588
		rs61249479	0.0536342	0.0838624	0.522465	-0.110736	0.218004	1.0551	0.895175	1.24359
		rs71405394	0.129924	0.0818355	0.112372	-0.0304739	0.290321	1.13874	0.969986	1.33686
		rs73232831	0.0801686	0.0849878	0.34553	-0.0864075	0.246745	1.08347	0.91722	1.27985
		rs9423647	0.0579701	0.099219	0.559043	-0.136499	0.252439	1.05968	0.872407	1.28716
		All - Inverse variance weighted	0.0783887	0.0310336	0.0115394	0.0175627	0.139215	1.08154	1.01772	1.14937
		All - MR Egger	0.146995	0.111964	0.215954	-0.0724541	0.366443	1.15835	0.930108	1.44259
	Verrucomicrobiales.id.403	SNP	b	se	p	lo_ci	up_ci	or	or_lci95	or_uci95
		rs11184341	-0.119001	0.080608	0.139866	-0.276992	0.0389909	0.887807	0.75806	1.03976
		rs111862613	-0.24168	0.0694362	0.000500288	-0.377775	-0.105585	0.785308	0.685385	0.899798
		rs117107102	0.0411942	0.0547515	0.45182	-0.0661188	0.148507	1.04205	0.93602	1.1601
		rs11729256	0.0472155	0.0838102	0.573188	-0.117052	0.211483	1.04835	0.889539	1.23551
		rs12908520	-0.0944622	0.0769537	0.219627	-0.245291	0.056367	0.909862	0.782476	1.05799
		rs2602429	0.0589306	0.0721445	0.414019	-0.0824726	0.200334	1.0607	0.920837	1.22181
		rs4242783	-0.000296365	0.0762842	0.9969	-0.149813	0.149221	0.999704	0.860869	1.16093
		rs4936098	-0.0177904	0.0762069	0.815413	-0.167156	0.131575	0.982367	0.846068	1.14062
		rs61779207	-0.110324	0.0749279	0.140912	-0.257183	0.0365345	0.895544	0.773227	1.03721
		rs74542928	-0.149624	0.0986255	0.129243	-0.34293	0.0436818	0.861032	0.709688	1.04465
		rs9349825	-0.0919005	0.085666	0.283371	-0.259806	0.0760048	0.912196	0.771201	1.07897
		rs941682	-0.0814081	0.0836484	0.330445	-0.245359	0.0825427	0.921817	0.782424	1.08605
		All - Inverse variance weighted	-0.0546573	0.0276595	0.0481462	-0.10887	-0.00044464	0.94681	0.896847	0.999555
		All - MR Egger	0.014889	0.0984892	0.882845	-0.17815	0.207928	1.015	0.836817	1.23112
	Gammaproteobacteria.id.33	SNP	b	se	p	lo_ci	up_ci	or	or_lci95	or_uci95
		rs11181912	-0.0138953	0.087061	0.873193	-0.184535	0.156744	0.986201	0.831491	1.1697
		rs12404135	-0.0712371	0.112544	0.526753	-0.291824	0.149349	0.931241	0.7469	1.16108
		rs2234691	-0.0347709	0.0934238	0.709755	-0.217882	0.14834	0.965827	0.804221	1.15991
		rs6469506	-0.160312	0.0923934	0.0827218	-0.341403	0.0207786	0.851878	0.710772	1.021
		rs6706173	-0.0236304	0.0922528	0.797836	-0.204446	0.157185	0.976647	0.815099	1.17021
		rs75101789	-0.127369	0.114698	0.266794	-0.352177	0.0974388	0.880409	0.703155	1.10234
		rs79795896	-0.12975	0.0702896	0.0649015	-0.267518	0.00801752	0.878315	0.765277	1.00805
		rs9494710	-0.0811803	0.0918108	0.376581	-0.26113	0.0987689	0.922027	0.770181	1.10381
		rs9973122	0.127187	0.116155	0.273527	-0.100477	0.35485	1.13563	0.904406	1.42597
		All - Inverse variance weighted	-0.0670483	0.0311396	0.0313069	-0.128082	-0.00601461	0.93515	0.879781	0.994003
		All - MR Egger	-0.107456	0.105882	0.343959	-0.314985	0.100074	0.898116	0.7298	1.10525
Cluster headache	Alcaligenaceae.id.2875	SNP	b	se	p	lo_ci	up_ci	or	or_lci95	or_uci95
		rs112135816	-0.291077	1.17179	0.803822	-2.58779	2.00563	0.747458	0.0751861	7.4308
		rs112159068	0.107005	0.980888	0.913131	-1.81553	2.02954	1.11294	0.162751	7.61062
		rs1153990	-1.1629	0.785298	0.138648	-2.70209	0.376281	0.312577	0.0670653	1.45686
		rs147968	-0.610115	0.875007	0.485635	-2.32513	1.1049	0.543289	0.097771	3.01892
		rs17000015	-1.66078	0.785596	0.0345124	-3.20054	-0.121008	0.189992	0.0407401	0.886027
		rs2367850	-1.06059	0.829014	0.200779	-2.68545	0.56428	0.346252	0.0681902	1.75818
		rs28480294	-0.193914	0.864166	0.822451	-1.88768	1.49985	0.823729	0.151423	4.48102
		rs4033856	-0.473142	0.92568	0.609261	-2.28748	1.34119	0.623041	0.101522	3.8236
		rs62191117	0.465369	0.772774	0.547037	-1.04927	1.98001	1.5926	0.350194	7.24279
		rs62395635	-0.22546	0.807939	0.780202	-1.80902	1.3581	0.798149	0.163815	3.8888
		rs67737557	-0.466425	0.726027	0.52059	-1.88944	0.956587	0.62724	0.151157	2.6028
		rs6969323	-0.259296	0.874826	0.766926	-1.97395	1.45536	0.771594	0.138906	4.28603
		rs7302582	0.977967	0.889764	0.271711	-0.765971	2.7219	2.65904	0.464882	15.2093
		rs74776516	-0.694198	0.913015	0.447054	-2.48371	1.09531	0.499475	0.0834334	2.99011
		rs7638039	-0.960343	0.822224	0.242814	-2.5719	0.651217	0.382761	0.07639	1.91787
		rs9537886	-1.09402	0.755056	0.147359	-2.57393	0.385891	0.334868	0.0762354	1.47092
		All - Inverse variance weighted	-0.51629	0.211369	0.0145818	-0.930573	-0.102007	0.59673	0.394328	0.903023
		All - MR Egger	0.811645	0.895964	0.38032	-0.944443	2.56773	2.25161	0.388896	13.0362
	unknowngenus.id.100000007	SNP	b	se	p	lo_ci	up_ci	or	or_lci95	or_uci95
		rs10517600	-0.995298	0.702979	0.156826	-2.37314	0.382541	0.369613	0.0931879	1.466
		rs10904722	-0.899612	0.74672	0.228299	-2.36318	0.563958	0.406727	0.0941202	1.75762
		rs118104867	-0.145717	0.387097	0.706592	-0.904426	0.612992	0.864402	0.404774	1.84595
		rs13409132	0.531471	0.71235	0.455618	-0.864735	1.92768	1.70143	0.421163	6.87353
		rs17121075	-0.631613	0.677664	0.351314	-1.95983	0.696609	0.531733	0.140882	2.00693
		rs2191834	-0.639183	0.673625	0.342687	-1.95949	0.681123	0.527724	0.140931	1.97609
		rs28691777	-0.58269	0.772567	0.450714	-2.09692	0.931542	0.558395	0.122834	2.53842
		rs34088226	0.63321	0.783028	0.418706	-0.901526	2.16795	1.88365	0.40595	8.74031
		rs55682560	-0.992545	0.604078	0.100367	-2.17654	0.191448	0.370632	0.113434	1.211
		rs6588624	-0.89602	0.647615	0.16649	-2.16535	0.373305	0.408191	0.11471	1.45253
		rs66714985	0.259084	0.604322	0.668128	-0.925387	1.44355	1.29574	0.396378	4.23572
		rs6755871	0.698841	0.698038	0.316754	-0.669313	2.067	2.01142	0.51206	7.90105
		rs7226487	-0.362382	0.66498	0.585787	-1.66574	0.940979	0.696016	0.18905	2.56249
		rs7538034	-0.948882	0.74222	0.201095	-2.40363	0.50587	0.387174	0.0903889	1.65843
		rs7725895	-0.309012	0.564025	0.583782	-1.4145	0.796477	0.734172	0.243047	2.21771
		rs989682	-0.799403	0.721399	0.267806	-2.21335	0.61454	0.449597	0.109334	1.84881
		rs9979874	0.0682934	0.61769	0.911963	-1.14238	1.27896	1.07068	0.319059	3.59292
		All - Inverse variance weighted	-0.331442	0.154622	0.0320685	-0.634502	-0.0283819	0.717888	0.530199	0.972017
		All - MR Egger	0.0837282	0.434059	0.849628	-0.767027	0.934483	1.08733	0.464392	2.5459
	Burkholderiales.id.2874	SNP	b	se	p	lo_ci	up_ci	or	or_lci95	or_uci95
		rs1511453	-0.431553	1.00322	0.667074	-2.39786	1.53476	0.6495	0.0909119	4.64021
		rs1928341	-0.536462	0.858443	0.53202	-2.21901	1.14609	0.584814	0.108717	3.14585
		rs2321387	-0.978019	0.85001	0.249898	-2.64404	0.688002	0.376055	0.0710736	1.98974
		rs2367850	-1.05356	0.823521	0.200779	-2.66766	0.560541	0.348694	0.0694144	1.75162
		rs2613606	-2.40477	0.857648	0.00504869	-4.08576	-0.723779	0.0902863	0.0168104	0.484916
		rs4033856	-0.464567	0.908903	0.609261	-2.24602	1.31688	0.628407	0.10582	3.73177
		rs6087811	-0.350079	0.697861	0.615916	-1.71789	1.01773	0.704632	0.179445	2.7669
		rs62191117	0.468317	0.777669	0.547037	-1.05591	1.99255	1.5973	0.347874	7.3342
		rs62395635	-0.226838	0.812877	0.780202	-1.82008	1.3664	0.79705	0.162013	3.92122
		rs72747231	-0.400408	0.757384	0.597033	-1.88488	1.08406	0.670047	0.151847	2.95667
		rs75242906	-0.222181	0.642675	0.729559	-1.48182	1.03746	0.80077	0.227223	2.82205
		rs7638039	-0.997283	0.853851	0.242814	-2.67083	0.676266	0.36888	0.0691946	1.96652
		All - Inverse variance weighted	-0.581974	0.232273	0.0122257	-1.03723	-0.126719	0.558794	0.354436	0.880981
		All - MR Egger	0.512554	0.711913	0.488031	-0.882795	1.9079	1.66955	0.413625	6.73895
Ocular pain	Oxalobacter.id.2978	SNP	b	se	p	lo_ci	up_ci	or	or_lci95	or_uci95
		rs10464997	-0.0251988	0.289013	0.930521	-0.591663	0.541266	0.975116	0.553406	1.71818
		rs11108500	-0.350684	0.276067	0.203983	-0.891775	0.190408	0.704206	0.409927	1.20974
		rs111966731	-0.426826	0.259633	0.100185	-0.935707	0.0820556	0.652577	0.392308	1.08552
		rs12002250	-0.538572	0.353793	0.127939	-1.23201	0.154863	0.583581	0.291707	1.1675
		rs1569853	0.127927	0.343398	0.709497	-0.545133	0.800986	1.13647	0.579765	2.22774
		rs36057338	0.0334258	0.417614	0.936205	-0.785098	0.85195	1.03399	0.456075	2.34421
		rs3862635	-0.437417	0.314083	0.163716	-1.05302	0.178185	0.645702	0.348883	1.19505
		rs4428215	0.162616	0.271784	0.549621	-0.370081	0.695314	1.17659	0.690678	2.00434
		rs6000536	-0.573041	0.315976	0.0697452	-1.19235	0.0462708	0.563808	0.303506	1.04736
		rs6071435	-0.0601147	0.301346	0.841882	-0.650753	0.530523	0.941657	0.521653	1.69982
		rs6993398	-0.300142	0.313292	0.338049	-0.914194	0.31391	0.740713	0.40084	1.36877
		rs736744	-0.0676271	0.264327	0.798069	-0.585708	0.450454	0.934609	0.556712	1.56902
		All - Inverse variance weighted	-0.204981	0.0872589	0.0188183	-0.376008	-0.0339535	0.814663	0.686597	0.966616
		All - MR Egger	-0.736794	0.38396	0.0839568	-1.48936	0.0157679	0.478646	0.225518	1.01589
	RuminococcaceaeUCG014	SNP	b	se	p	lo_ci	up_ci	or	or_lci95	or_uci95
		rs10495392	1.49568	0.72773	0.0398525	0.0693342	2.92204	4.46239	1.07179	18.5791
		rs10791168	0.603424	0.604312	0.318022	-0.581027	1.78788	1.82837	0.559324	5.97674
		rs10941294	0.848937	0.562735	0.131404	-0.254024	1.9519	2.33716	0.775673	7.04204
		rs115777838	0.277446	0.260748	0.28731	-0.233619	0.788512	1.31976	0.791663	2.20012
		rs12638134	0.149805	0.535722	0.77976	-0.900211	1.19982	1.16161	0.406484	3.31952
		rs17296933	0.556333	0.587399	0.343581	-0.594968	1.70763	1.74427	0.55158	5.5159
		rs34402072	-0.314768	0.638903	0.622246	-1.56702	0.937481	0.729958	0.208666	2.55354
		rs439810	0.382639	0.56858	0.500965	-0.731779	1.49706	1.46615	0.481053	4.46851
		rs56105232	1.04744	0.460444	0.0229149	0.144971	1.94991	2.85035	1.15601	7.02805
		rs61898819	-0.789166	0.643737	0.220231	-2.05089	0.472559	0.454224	0.12862	1.60409
		rs62478832	0.218158	0.560614	0.697172	-0.880645	1.31696	1.24378	0.414516	3.73206
		rs72809222	0.334298	0.566532	0.555138	-0.776105	1.4447	1.39696	0.460195	4.24058
		rs74060145	0.594283	0.494273	0.229233	-0.374493	1.56306	1.81173	0.687638	4.7734
		rs79640386	-0.308098	0.41182	0.454377	-1.11527	0.499069	0.734843	0.327828	1.64719
		rs853612	-0.0958596	0.597769	0.872596	-1.26749	1.07577	0.908592	0.281538	2.93225
		rs995642	0.127111	0.603124	0.833079	-1.05501	1.30923	1.13554	0.348188	3.70334
		All - Inverse variance weighted	0.303771	0.125607	0.0155878	0.0575815	0.549961	1.35496	1.05927	1.73319
		All - MR Egger	0.609854	0.321021	0.0782661	-0.0193478	1.23906	1.84016	0.980838	3.45235
	Bacillales.id.1674	SNP	b	se	p	lo_ci	up_ci	or	or_lci95	or_uci95
		rs10233278	0.448433	0.268934	0.0954265	-0.0786788	0.975544	1.56586	0.924337	2.65261
		rs10410917	0.335934	0.276116	0.223742	-0.205254	0.877121	1.39925	0.814441	2.40397
		rs11034576	0.0897803	0.227199	0.692723	-0.355529	0.535089	1.09393	0.700803	1.7076
		rs11207728	0.459808	0.290166	0.113049	-0.108918	1.02853	1.58377	0.896804	2.79696
		rs11844714	0.250732	0.26756	0.348705	-0.273686	0.775149	1.28497	0.760571	2.17092
		rs12522021	-0.12198	0.259251	0.637991	-0.630113	0.386153	0.885166	0.532532	1.47131
		rs1287018	0.0831844	0.28104	0.76724	-0.467654	0.634023	1.08674	0.62647	1.88518
		rs4617108	0.307911	0.222218	0.165861	-0.127636	0.743457	1.36058	0.880174	2.10319
		rs74420793	-0.104432	0.30953	0.735825	-0.71111	0.502247	0.900836	0.491099	1.65243
		All - Inverse variance weighted	0.197049	0.087575	0.0244449	0.0254024	0.368696	1.2178	1.02573	1.44585
		All - MR Egger	-0.0996753	0.365707	0.79306	-0.816461	0.617111	0.905131	0.441993	1.85356
	Clostridiales.id.1863	SNP	b	se	p	lo_ci	up_ci	or	or_lci95	or_uci95
		rs10209007	-0.0579791	0.879822	0.947458	-1.78243	1.66647	0.94367	0.168229	5.29346
		rs10774377	-1.2052	0.599358	0.0443454	-2.37994	-0.0304542	0.299633	0.0925565	0.970005
		rs112334273	0.263843	0.540732	0.625594	-0.795991	1.32368	1.30192	0.451134	3.75721
		rs13105690	-1.72219	0.640883	0.00720505	-2.97832	-0.46606	0.178674	0.0508781	0.627469
		rs13179700	-0.0554076	0.637472	0.930737	-1.30485	1.19404	0.946099	0.271213	3.30038
		rs1842454	0.831082	0.730981	0.255564	-0.601642	2.26381	2.2958	0.547911	9.61962
		rs2273429	0.303484	0.691997	0.660979	-1.05283	1.6598	1.35457	0.348949	5.25825
		rs6442336	0.0827508	0.651256	0.89889	-1.19371	1.35921	1.08627	0.303094	3.89313
		rs6814436	-0.506813	0.597743	0.396506	-1.67839	0.664763	0.602412	0.186675	1.94403
		rs6815608	-0.773518	0.414102	0.0617706	-1.58516	0.0381228	0.461387	0.204915	1.03886
		rs6934062	-0.353991	0.635332	0.577408	-1.59924	0.89126	0.701881	0.202049	2.4382
		rs7269302	0.542365	0.674701	0.421478	-0.780049	1.86478	1.72007	0.458384	6.45451
		rs72738886	-0.391706	0.678602	0.563788	-1.72177	0.938354	0.675903	0.17875	2.55577
		rs76860606	-0.766346	0.585452	0.190541	-1.91383	0.38114	0.464708	0.147514	1.46395
		All - Inverse variance weighted	-0.355069	0.179549	0.0479784	-0.706986	-0.00315285	0.701125	0.493128	0.996852
		All - MR Egger	-0.362118	0.742486	0.634544	-1.81739	1.09315	0.6962	0.162449	2.98367
	Clostridia.id.1859	SNP	b	se	p	lo_ci	up_ci	or	or_lci95	or_uci95
		rs10209007	-0.0580705	0.881209	0.947458	-1.78524	1.6691	0.943583	0.167757	5.30738
		rs10774377	-1.19699	0.595275	0.0443454	-2.36373	-0.0302468	0.302103	0.0940691	0.970206
		rs112334273	0.263175	0.539361	0.625594	-0.793974	1.32032	1.30105	0.452045	3.74463
		rs13105690	-1.7168	0.638877	0.00720505	-2.969	-0.464601	0.17964	0.0513546	0.628386
		rs13179700	-0.0553012	0.636247	0.930737	-1.30234	1.19174	0.9462	0.271894	3.29281
		rs13421739	-0.860858	0.689839	0.212063	-2.21294	0.491226	0.422799	0.109378	1.63432
		rs1842454	0.825726	0.726271	0.255564	-0.597765	2.24922	2.28354	0.55004	9.48031
		rs2273429	0.304386	0.694055	0.660979	-1.05596	1.66473	1.35579	0.347857	5.28427
		rs6797343	0.587352	0.662017	0.374963	-0.710203	1.88491	1.79922	0.491545	6.58573
		rs6814436	-0.508089	0.599247	0.396506	-1.68261	0.666436	0.601644	0.185887	1.94729
		rs6815608	-0.775648	0.415243	0.0617706	-1.58952	0.0382277	0.460405	0.204023	1.03897
		rs6934062	-0.352635	0.632899	0.577408	-1.59312	0.887847	0.702833	0.203291	2.42989
		rs7269302	0.543133	0.675657	0.421478	-0.781154	1.86742	1.72139	0.457877	6.47158
		rs72738886	-0.391328	0.677947	0.563788	-1.7201	0.937449	0.676159	0.179048	2.55346
		rs76860606	-0.76164	0.581857	0.190541	-1.90208	0.378799	0.4669	0.149258	1.46053
		All - Inverse variance weighted	-0.353549	0.179294	0.0486215	-0.704966	-0.00213277	0.702191	0.494125	0.997869
		All - MR Egger	-0.495034	0.74799	0.519646	-1.96109	0.971025	0.60955	0.140704	2.64065
Migraine	Eubacteriumcoprostanolig	SNP	b	se	p	lo_ci	up_ci	or	or_lci95	or_uci95
		rs1020520	-0.30511	0.258461	0.237806	-0.811693	0.201473	0.737042	0.444105	1.2232
		rs10444197	0.0190188	0.228297	0.933607	-0.428444	0.466482	1.0192	0.651522	1.59437
		rs11052069	0.153739	0.231318	0.506293	-0.299644	0.607122	1.16619	0.741082	1.83514
		rs11720857	-0.207283	0.229365	0.366142	-0.656839	0.242273	0.81279	0.518488	1.27414
		rs12906958	-0.313034	0.226088	0.166185	-0.756167	0.130099	0.731225	0.469462	1.13894
		rs17159861	-0.144232	0.184772	0.435042	-0.506386	0.217922	0.865687	0.60267	1.24349
		rs2644213	-0.382635	0.221878	0.0846127	-0.817516	0.0522463	0.682062	0.441527	1.05364
		rs4076415	-0.0190216	0.221931	0.931697	-0.454006	0.415962	0.981158	0.635079	1.51583
		rs4717831	-0.460333	0.197451	0.0197334	-0.847337	-0.0733291	0.631073	0.428555	0.929295
		rs62024432	-0.136318	0.242016	0.573256	-0.610669	0.338033	0.872565	0.542987	1.40219
		rs6762473	-0.325612	0.221305	0.141202	-0.75937	0.108145	0.722085	0.467961	1.11421
		rs76898927	0.109537	0.196933	0.578064	-0.276452	0.495526	1.11576	0.75847	1.64136
		rs9648214	-0.0738044	0.236226	0.754713	-0.536807	0.389198	0.928853	0.584612	1.4758
		All - Inverse variance weighted	-0.160563	0.0610654	0.00855466	-0.280251	-0.0408745	0.851664	0.755594	0.95995
		All - MR Egger	-0.0929633	0.235309	0.700345	-0.554169	0.368242	0.911227	0.57455	1.44519
	Eubacteriumrectalegroup	SNP	b	se	p	lo_ci	up_ci	or	or_lci95	or_uci95
		rs10248854	-0.237275	0.212905	0.265081	-0.654569	0.180019	0.788774	0.519666	1.19724
		rs10797540	-0.328241	0.21951	0.134828	-0.758481	0.101999	0.720189	0.468377	1.10738
		rs10892089	-0.499387	0.2227	0.0249347	-0.935879	-0.0628936	0.606903	0.392241	0.939043
		rs143694765	-0.128328	0.2092	0.539595	-0.53836	0.281703	0.879564	0.583705	1.32538
		rs16960159	0.00280968	0.119078	0.981175	-0.230584	0.236203	1.00281	0.79407	1.26643
		rs2884897	0.0567478	0.229759	0.804918	-0.39358	0.507076	1.05839	0.674637	1.66043
		rs314726	-0.152232	0.209302	0.467024	-0.562464	0.258001	0.858789	0.569803	1.29434
		rs35398954	-0.039448	0.165544	0.811654	-0.363915	0.285019	0.96132	0.69495	1.32979
		rs3980709	0.128051	0.232148	0.581227	-0.326959	0.583062	1.13661	0.721113	1.79152
		rs59427698	-0.298723	0.244787	0.222337	-0.778506	0.18106	0.741765	0.459091	1.19849
		rs62547233	-0.336203	0.226664	0.138003	-0.780464	0.108058	0.714478	0.458194	1.11411
		All - Inverse variance weighted	-0.130799	0.0587911	0.0260941	-0.246029	-0.0155684	0.877394	0.781899	0.984552
		All - MR Egger	0.167143	0.161403	0.327427	-0.149206	0.483492	1.18192	0.861392	1.62173
	Oxalobacter.id.2978	SNP	b	se	p	lo_ci	up_ci	or	or_lci95	or_uci95
		rs10464997	-0.0151825	0.102403	0.882135	-0.215891	0.185526	0.984932	0.805823	1.20385
		rs11108500	0.0157596	0.0984038	0.872761	-0.177112	0.208631	1.01588	0.837686	1.23199
		rs111966731	-0.019385	0.0917948	0.832748	-0.199303	0.160533	0.980802	0.819302	1.17414
		rs12002250	0.131886	0.125292	0.292511	-0.113686	0.377458	1.14098	0.892538	1.45857
		rs1569853	0.389187	0.12276	0.00152277	0.148578	0.629797	1.47578	1.16018	1.87723
		rs36057338	0.180001	0.148607	0.225797	-0.111268	0.471271	1.19722	0.894699	1.60203
		rs3862635	0.0528969	0.111186	0.63425	-0.165027	0.270821	1.05432	0.847871	1.31104
		rs4428215	0.0326007	0.0965573	0.735642	-0.156652	0.221853	1.03314	0.855002	1.24839
		rs6000536	-0.00877895	0.112156	0.93761	-0.228605	0.211047	0.991259	0.795643	1.23497
		rs6071435	0.018052	0.107309	0.866406	-0.192273	0.228377	1.01822	0.825081	1.25656
		rs6993398	0.173311	0.111343	0.119579	-0.0449225	0.391544	1.18924	0.956072	1.47926
		rs736744	0.0610211	0.0939032	0.515802	-0.123029	0.245071	1.06292	0.884238	1.27771
		All - Inverse variance weighted	0.0670392	0.0313529	0.0324997	0.00558739	0.128491	1.06934	1.0056	1.13711
		All - MR Egger	0.0487822	0.144497	0.742644	-0.234432	0.331997	1.04999	0.79102	1.39375
	Victivallis.id.2256	SNP	b	se	p	lo_ci	up_ci	or	or_lci95	or_uci95
		rs11899949	0.0757677	0.0909443	0.404776	-0.102483	0.254019	1.07871	0.902593	1.2892
		rs12512543	0.0136809	0.110976	0.901887	-0.203832	0.231193	1.01377	0.8156	1.2601
		rs173120	0.163075	0.104948	0.120218	-0.0426238	0.368773	1.17712	0.958272	1.44596
		rs1882775	0.057654	0.102596	0.57415	-0.143434	0.258742	1.05935	0.866378	1.2953
		rs2546432	0.000581577	0.0993789	0.995331	-0.194201	0.195364	1.00058	0.823492	1.21575
		rs342302	0.119397	0.104627	0.253802	-0.0856724	0.324465	1.12682	0.917895	1.38329
		rs4764863	0.0486509	0.0910739	0.593209	-0.129854	0.227156	1.04985	0.878224	1.25503
		rs4895919	-0.0337197	0.0941801	0.720318	-0.218313	0.150873	0.966843	0.803874	1.16285
		rs56349194	0.185897	0.103896	0.0735739	-0.0177399	0.389534	1.2043	0.982417	1.47629
		rs592514	0.0980882	0.0916743	0.284635	-0.0815934	0.27777	1.10306	0.921647	1.32018
		rs6445926	-0.0748278	0.0951486	0.431615	-0.261319	0.111663	0.927903	0.770035	1.11814
		rs911666	0.0763426	0.100509	0.447517	-0.120655	0.27334	1.07933	0.88634	1.31435
		All - Inverse variance weighted	0.0581183	0.0284569	0.0411186	0.0023429	0.113894	1.05984	1.00235	1.12063
		All - MR Egger	0.318978	0.188341	0.121204	-0.0501704	0.688127	1.37572	0.951067	1.98998
Pain in thoracic spine	Butyricimonas.id.945	SNP	b	se	p	lo_ci	up_ci	or	or_lci95	or_uci95
		rs11228830	-0.161592	0.279574	0.563268	-0.709556	0.386373	0.850788	0.491862	1.47163
		rs113054641	0.0391969	0.352585	0.911481	-0.651869	0.730263	1.03998	0.521071	2.07563
		rs12304031	0.726565	0.376623	0.0537114	-0.0116163	1.46475	2.06796	0.988451	4.32644
		rs12458763	0.393793	0.420235	0.348718	-0.429868	1.21745	1.48259	0.650595	3.37858
		rs1862649	0.20596	0.367024	0.574687	-0.513407	0.925327	1.2287	0.598453	2.52269
		rs2114713	0.0669664	0.337492	0.842713	-0.594517	0.72845	1.06926	0.551829	2.07187
		rs2642760	0.497252	0.319998	0.120203	-0.129945	1.12445	1.6442	0.878144	3.07852
		rs270727	-0.040532	0.324877	0.900713	-0.677292	0.596228	0.960278	0.507991	1.81526
		rs326049	0.706444	0.31436	0.0246242	0.0902991	1.32259	2.02677	1.0945	3.75312
		rs62130338	0.127264	0.302619	0.674089	-0.465869	0.720397	1.13572	0.62759	2.05525
		rs62390301	-0.0926973	0.301853	0.758772	-0.68433	0.498935	0.911469	0.504428	1.64697
		rs7083431	0.208747	0.337442	0.536169	-0.45264	0.870134	1.23213	0.635947	2.38723
		rs71428626	0.540912	0.457486	0.237064	-0.35576	1.43758	1.71757	0.700641	4.21051
		rs72814525	-0.175968	0.372232	0.6364	-0.905543	0.553606	0.838645	0.404322	1.73951
		rs782080	0.204466	0.326546	0.531219	-0.435565	0.844496	1.22687	0.646899	2.32681
		rs78453362	-0.144389	0.455024	0.751	-1.03624	0.747458	0.865551	0.354787	2.11163
		rs9657374	0.162146	0.336847	0.630257	-0.498073	0.822365	1.17603	0.6077	2.27588
		All - Inverse variance weighted	0.176144	0.083101	0.0340369	0.0132658	0.339022	1.19261	1.01335	1.40357
		All - MR Egger	0.0334133	0.328966	0.920443	-0.611361	0.678187	1.03398	0.542612	1.9703
	Lachnospira.id.2004	SNP	b	se	p	lo_ci	up_ci	or	or_lci95	or_uci95
		rs13157098	-0.345376	0.372392	0.353692	-1.07526	0.384513	0.707954	0.341207	1.4689
		rs159484	0.0592407	0.512107	0.907906	-0.944489	1.06297	1.06103	0.388878	2.89496
		rs2326833	-0.663752	0.365779	0.0695813	-1.38068	0.0531744	0.514916	0.251408	1.05461
		rs2520509	-0.612263	0.447447	0.171203	-1.48926	0.264733	0.542122	0.22554	1.30308
		rs4686798	-0.169987	0.410621	0.678893	-0.974804	0.634831	0.843676	0.377266	1.8867
		rs4923324	-0.22153	0.464041	0.633082	-1.13105	0.68799	0.801292	0.322694	1.98971
		rs56791201	-0.350657	0.422372	0.406421	-1.17851	0.477193	0.704225	0.307738	1.61154
		All - Inverse variance weighted	-0.360098	0.158763	0.0233207	-0.671274	-0.0489212	0.697608	0.511057	0.952256
		All - MR Egger	-0.404298	0.863718	0.659414	-2.09719	1.28859	0.667445	0.122802	3.62766
Fibromyalgia	Rhodospirillaceae.id.271	SNP	b	se	p	lo_ci	up_ci	or	or_lci95	or_uci95
		rs1035406	-0.14078	0.40893	0.730647	-0.942282	0.660722	0.86868	0.389737	1.93619
		rs11591293	0.536197	0.404009	0.184446	-0.255661	1.32805	1.70949	0.774405	3.7737
		rs12977163	0.352675	0.417318	0.398056	-0.465268	1.17062	1.42287	0.627967	3.22398
		rs13336560	-0.693056	0.431231	0.10802	-1.53827	0.152158	0.500046	0.214753	1.16434
		rs1549633	-0.180281	0.46868	0.700492	-1.09889	0.738332	0.835036	0.333239	2.09244
		rs1923415	-0.31733	0.526836	0.546953	-1.34993	0.715268	0.72809	0.259259	2.04473
		rs3754624	-0.142636	0.401138	0.722156	-0.928866	0.643594	0.86707	0.395001	1.90331
		rs4278423	0.38942	0.57624	0.499172	-0.740012	1.51885	1.47612	0.477108	4.56697
		rs4822789	0.721853	0.415028	0.0819843	-0.0916023	1.53531	2.05824	0.912468	4.64276
		rs61933850	0.274647	0.262581	0.295583	-0.240011	0.789305	1.31607	0.786619	2.20187
		rs6679026	0.33274	0.441241	0.450789	-0.532093	1.19757	1.39478	0.587374	3.31207
		rs7001029	-0.461291	0.438723	0.293057	-1.32119	0.398607	0.630469	0.266818	1.48975
		rs72714493	0.509694	0.512788	0.320239	-0.49537	1.51476	1.66478	0.609345	4.54832
		rs74354280	0.0889791	0.362057	0.805868	-0.620652	0.79861	1.09306	0.537594	2.22245
		rs76784716	0.727432	0.341122	0.0329683	0.0588329	1.39603	2.06976	1.0606	4.03913
		rs9813022	0.856859	0.36429	0.018666	0.142851	1.57087	2.35575	1.15356	4.81082
		All - Inverse variance weighted	0.221391	0.111268	0.0466219	0.00330674	0.439476	1.24781	1.00331	1.55189
		All - MR Egger	0.205157	0.458598	0.661461	-0.693696	1.10401	1.22772	0.499726	3.01624
	Erysipelatoclostridium	SNP	b	se	p	lo_ci	up_ci	or	or_lci95	or_uci95
		rs1434153	0.621596	0.437602	0.155474	-0.236103	1.4793	1.8619	0.789699	4.38985
		rs16936671	-0.148522	0.442605	0.7372	-1.01603	0.718984	0.861981	0.36203	2.05235
		rs17804233	0.23933	0.448517	0.593616	-0.639763	1.11842	1.2704	0.527417	3.06002
		rs2901723	-0.836173	0.468982	0.0745937	-1.75538	0.083031	0.433366	0.172842	1.08658
		rs340991	0.096293	0.454152	0.832085	-0.793844	0.98643	1.10108	0.452104	2.68164
		rs34528142	-0.87667	0.422732	0.0380959	-1.70522	-0.0481159	0.416166	0.181732	0.953023
		rs3804326	-0.702259	0.482049	0.145166	-1.64707	0.242558	0.495465	0.192613	1.2745
		rs45480394	-0.829923	0.450925	0.0656961	-1.71374	0.0538893	0.436083	0.180191	1.05537
		rs4697572	-1.46394	0.449231	0.001119	-2.34443	-0.583443	0.231324	0.095902	0.557974
		rs58236560	-0.747824	0.408553	0.0671871	-1.54859	0.0529401	0.473395	0.212548	1.05437
		rs61806970	0.546223	0.416493	0.189695	-0.270104	1.36255	1.72672	0.7633	3.90614
		rs622418	-0.43287	0.444613	0.330261	-1.30431	0.438571	0.648645	0.27136	1.55049
		rs6474512	-0.0380579	0.455786	0.933454	-0.931399	0.855283	0.962657	0.394002	2.35204
		rs710230	-0.396376	0.400298	0.322075	-1.18096	0.388208	0.672754	0.306984	1.47434
		rs7221249	-0.122429	0.354105	0.729537	-0.816475	0.571618	0.884769	0.441987	1.77113
		rs9590927	-0.010714	0.462097	0.981502	-0.916424	0.894996	0.989343	0.399947	2.44733
		All - Inverse variance weighted	-0.307386	0.140493	0.0286766	-0.582753	-0.032019	0.735367	0.558359	0.968488
		All - MR Egger	-0.434676	0.585128	0.469841	-1.58153	0.712175	0.647475	0.205661	2.03842
	unknowngenus.id.959	SNP	b	se	p	lo_ci	up_ci	or	or_lci95	or_uci95
		rs10892421	-0.458407	0.288725	0.112356	-1.02431	0.107494	0.63229	0.359045	1.11348
		rs115909738	0.0818664	0.287146	0.775565	-0.480939	0.644672	1.08531	0.618202	1.90536
		rs11691923	-0.0286809	0.322501	0.929135	-0.660784	0.603422	0.971726	0.516446	1.82836
		rs12261792	-0.905891	0.34725	0.00908725	-1.5865	-0.22528	0.404182	0.20464	0.798293
		rs1969793	0.385594	0.312117	0.216675	-0.226154	0.997343	1.47049	0.797595	2.71107
		rs2199860	-0.260062	0.277401	0.348504	-0.803768	0.283644	0.771004	0.447639	1.32796
		rs2317372	-0.748138	0.322995	0.0205445	-1.38121	-0.115068	0.473247	0.251275	0.891306
		rs2831909	-0.240853	0.343023	0.482587	-0.913179	0.431472	0.785957	0.401247	1.53952
		rs474008	0.163926	0.339241	0.628945	-0.500987	0.828838	1.17813	0.605932	2.29066
		rs4766410	-0.218753	0.344204	0.525082	-0.893393	0.455888	0.803521	0.409265	1.57757
		rs56210598	0.0265306	0.29069	0.92728	-0.543221	0.596282	1.02689	0.580874	1.81536
		rs66473610	-0.410926	0.249757	0.0999071	-0.900449	0.0785974	0.663036	0.406387	1.08177
		rs75285799	-0.0212288	0.309045	0.945235	-0.626956	0.584499	0.978995	0.534215	1.79409
		rs9534068	-0.0453216	0.311064	0.884159	-0.655006	0.564363	0.95569	0.519439	1.75833
		All - Inverse variance weighted	-0.189844	0.0899219	0.0347543	-0.366091	-0.0135971	0.827088	0.69344	0.986495
		All - MR Egger	-0.374205	0.531212	0.494606	-1.41538	0.66697	0.687836	0.242833	1.94832
neck or shoulder pain	genus.RuminococcaceaeUCG010.id.	SNP	b	se	p	lo_ci	up_ci	or	or_lci95	or_uci95
		rs12597105	-0.0173512	0.0146016	0.234714	-0.0459703	0.011268	0.982799	0.95507	1.01133
		rs2820282	-0.0143477	0.0149403	0.336889	-0.0436307	0.0149354	0.985755	0.957307	1.01505
		rs35506912	-0.0123417	0.0150978	0.41367	-0.0419335	0.01725	0.987734	0.958934	1.0174
		rs682403	-0.00849464	0.0148963	0.568506	-0.0376913	0.0207021	0.991541	0.96301	1.02092
		rs6958419	0.0104579	0.014967	0.484719	-0.0188773	0.0397931	1.01051	0.9813	1.0406
		rs73218807	-0.0146019	0.0121546	0.229614	-0.0384249	0.00922101	0.985504	0.962304	1.00926
		rs7441445	-0.0195134	0.0156985	0.213862	-0.0502824	0.0112555	0.980676	0.950961	1.01132
		rs7935775	-0.010905	0.015347	0.477352	-0.0409851	0.019175	0.989154	0.959843	1.01936
		All - Inverse variance weighted	-0.0110563	0.00515708	0.0320408	-0.0211641	-0.000948392	0.989005	0.979058	0.999052
		All - MR Egger	-0.0187314	0.019035	0.363093	-0.05604	0.0185772	0.981443	0.945501	1.01875
Knee pain	Negativicutes.id.2164	SNP	b	se	p	lo_ci	up_ci	or	or_lci95	or_uci95
		rs1135612	0.0806285	0.0401848	0.0448088	0.00186636	0.159391	1.08397	1.00187	1.1728
		rs13086907	-0.00515608	0.0360686	0.886328	-0.0758505	0.0655383	0.994857	0.926955	1.06773
		rs1447205	0.0631529	0.0378187	0.0949422	-0.0109718	0.137277	1.06519	0.989088	1.14715
		rs1643968	0.016322	0.0359148	0.649494	-0.0540711	0.0867151	1.01646	0.947365	1.09059
		rs1649999	0.0530527	0.0388693	0.172285	-0.0231312	0.129237	1.05449	0.977134	1.13796
		rs2834062	0.0225839	0.0408273	0.580157	-0.0574377	0.102605	1.02284	0.944181	1.10805
		rs4463806	0.0375363	0.0405257	0.354323	-0.041894	0.116967	1.03825	0.958971	1.12408
		rs4722181	0.0234404	0.0370237	0.526656	-0.0491261	0.0960069	1.02372	0.952061	1.10077
		rs60274479	0.0187716	0.0362983	0.605052	-0.0523731	0.0899163	1.01895	0.948975	1.09408
		rs61249479	-0.025478	0.0422677	0.546658	-0.108323	0.0573668	0.974844	0.897338	1.05904
		rs71405394	0.00599794	0.032344	0.852882	-0.0573963	0.0693922	1.00602	0.94422	1.07186
		rs73232831	0.00968485	0.0263802	0.713525	-0.0420204	0.0613901	1.00973	0.95885	1.06331
		rs9423647	0.0413963	0.0388657	0.286824	-0.0347803	0.117573	1.04227	0.965818	1.12476
		All - Inverse variance weighted	0.0242408	0.0100829	0.0162105	0.00447825	0.0440033	1.02454	1.00449	1.04499
		All - MR Egger	-0.0151434	0.0324047	0.64939	-0.0786566	0.0483697	0.984971	0.924357	1.04956
	Rhodospirillaceae.id.271	SNP	b	se	p	lo_ci	up_ci	or	or_lci95	or_uci95
		rs1035406	0.0118053	0.025733	0.646407	-0.0386315	0.062242	1.01188	0.962105	1.06422
		rs11591293	0.016907	0.0256282	0.509446	-0.0333244	0.0671384	1.01705	0.967225	1.06944
		rs12977163	-0.0403668	0.0261518	0.122695	-0.0916244	0.0108907	0.960437	0.912448	1.01095
		rs13336560	0.0400871	0.0276192	0.146662	-0.0140465	0.0942208	1.0409	0.986052	1.0988
		rs1549633	0.017562	0.0262257	0.503083	-0.0338405	0.0689644	1.01772	0.966726	1.0714
		rs1923415	0.0207071	0.0282989	0.464334	-0.0347587	0.0761729	1.02092	0.965838	1.07915
		rs3754624	0.0244831	0.0245303	0.318244	-0.0235964	0.0725625	1.02479	0.97668	1.07526
		rs4278423	0.0350584	0.02634	0.183191	-0.016568	0.0866848	1.03568	0.983568	1.09055
		rs4822789	-0.00504846	0.0266852	0.849947	-0.0573515	0.0472545	0.994964	0.944262	1.04839
		rs55876211	0.0559864	0.0263793	0.0338077	0.00428289	0.10769	1.05758	1.00429	1.1137
		rs61933850	0.0263175	0.023119	0.254975	-0.0189958	0.0716309	1.02667	0.981184	1.07426
		rs6679026	8.84286e-05	0.027099	0.997396	-0.0530256	0.0532025	1.00009	0.948356	1.05464
		rs7001029	0.0169304	0.0272863	0.534947	-0.0365508	0.0704116	1.01707	0.964109	1.07295
		rs72714493	-0.00397676	0.0262163	0.879431	-0.0553607	0.0474072	0.996031	0.946144	1.04855
		rs74354280	-0.0373713	0.0271495	0.168667	-0.0905843	0.0158417	0.963318	0.913397	1.01597
		rs76784716	0.00233662	0.0272313	0.93162	-0.0510367	0.05571	1.00234	0.950244	1.05729
		rs9813022	0.0317291	0.0241101	0.188171	-0.0155267	0.0789849	1.03224	0.984593	1.08219
		All - Inverse variance weighted	0.0131043	0.00633607	0.0386203	0.000685625	0.025523	1.01319	1.00069	1.02585
		All - MR Egger	0.0346077	0.0294928	0.258921	-0.0231982	0.0924136	1.03521	0.977069	1.09682
	Anaerofilum.id.2053	SNP	b	se	p	lo_ci	up_ci	or	or_lci95	or_uci95
		rs10794359	0.0404531	0.0199076	0.0421496	0.00143415	0.079472	1.04128	1.00144	1.08272
		rs1563175	0.0495193	0.0203796	0.0151054	0.0095752	0.0894634	1.05077	1.00962	1.09359
		rs17012738	0.0165753	0.0206991	0.423262	-0.0239949	0.0571455	1.01671	0.976291	1.05881
		rs17096874	0.00252979	0.0197814	0.898238	-0.0362417	0.0413013	1.00253	0.964407	1.04217
		rs17105491	0.0168432	0.0199655	0.398884	-0.0222892	0.0559756	1.01699	0.977957	1.05757
		rs356049	0.00635902	0.0203125	0.754235	-0.0334534	0.0461714	1.00638	0.9671	1.04725
		rs4244069	-0.00161301	0.0206871	0.93785	-0.0421597	0.0389337	0.998388	0.958717	1.0397
		rs4506496	0.000694875	0.0191335	0.971029	-0.0368068	0.0381965	1.0007	0.963862	1.03894
		rs712981	-0.00481717	0.0188311	0.798098	-0.041726	0.0320917	0.995194	0.959133	1.03261
		rs79598899	0.0176999	0.0185758	0.340668	-0.0187087	0.0541085	1.01786	0.981465	1.0556
		rs816292	-0.00811177	0.0187006	0.664456	-0.044765	0.0285415	0.991921	0.956222	1.02895
		rs9299345	0.0239828	0.020235	0.235934	-0.0156779	0.0636435	1.02427	0.984444	1.06571
		All - Inverse variance weighted	0.0128186	0.00569425	0.0243766	0.00165783	0.0239793	1.0129	1.00166	1.02427
		All - MR Egger	-0.00278531	0.0254025	0.914858	-0.0525742	0.0470036	0.997219	0.948784	1.04813
	Rhodospirillales.id.2667	SNP	b	se	p	lo_ci	up_ci	or	or_lci95	or_uci95
		rs1035406	0.0116833	0.0254673	0.646407	-0.0382325	0.0615992	1.01175	0.962489	1.06354
		rs11591293	0.0173849	0.0263526	0.509446	-0.0342663	0.0690361	1.01754	0.966314	1.07147
		rs11630875	0.0106376	0.0256777	0.678675	-0.0396907	0.0609658	1.01069	0.961087	1.06286
		rs13336560	0.0404564	0.0278736	0.146662	-0.0141759	0.0950887	1.04129	0.985924	1.09976
		rs1549633	0.0176074	0.0262935	0.503083	-0.033928	0.0691427	1.01776	0.966641	1.07159
		rs3730086	-0.00189634	0.0276999	0.945419	-0.0561881	0.0523954	0.998105	0.945361	1.05379
		rs3754624	0.0252662	0.025315	0.318244	-0.0243511	0.0748836	1.02559	0.975943	1.07776
		rs4278423	0.0358295	0.0269193	0.183191	-0.0169324	0.0885914	1.03648	0.98321	1.09263
		rs4822789	-0.00509401	0.026926	0.849947	-0.0578689	0.0476809	0.994919	0.943774	1.04884
		rs55876211	0.0590186	0.027808	0.0338077	0.00451485	0.113522	1.06079	1.00453	1.12022
		rs61933850	0.0263408	0.0231395	0.254975	-0.0190126	0.0716943	1.02669	0.981167	1.07433
		rs7001029	0.0164592	0.026527	0.534947	-0.0355336	0.0684521	1.0166	0.96509	1.07085
		rs76784716	0.00233679	0.0272333	0.93162	-0.0510405	0.0557141	1.00234	0.95024	1.0573
		rs77304857	-0.015368	0.0267055	0.564979	-0.0677107	0.0369748	0.98475	0.934531	1.03767
		rs9813022	0.032174	0.0244482	0.188171	-0.0157444	0.0800924	1.0327	0.984379	1.08339
		All - Inverse variance weighted	0.0183176	0.00676348	0.00676275	0.00506116	0.031574	1.01849	1.00507	1.03208
		All - MR Egger	0.0128106	0.0305292	0.681616	-0.0470266	0.0726477	1.01289	0.954062	1.07535
	Selenomonadales.id.2165	SNP	b	se	p	lo_ci	up_ci	or	or_lci95	or_uci95
		rs1135612	0.0806285	0.0401848	0.0448088	0.00186636	0.159391	1.08397	1.00187	1.1728
		rs13086907	-0.00515608	0.0360686	0.886328	-0.0758504	0.0655383	0.994857	0.926955	1.06773
		rs1447205	0.0631529	0.0378187	0.0949422	-0.0109718	0.137277	1.06519	0.989088	1.14715
		rs1643968	0.016322	0.0359148	0.649494	-0.0540711	0.0867151	1.01646	0.947365	1.09059
		rs1649999	0.0530527	0.0388693	0.172285	-0.0231312	0.129237	1.05449	0.977134	1.13796
		rs2834062	0.0225839	0.0408273	0.580157	-0.0574377	0.102605	1.02284	0.944181	1.10805
		rs4463806	0.0375363	0.0405257	0.354323	-0.041894	0.116967	1.03825	0.958971	1.12408
		rs4722181	0.0234404	0.0370237	0.526656	-0.0491261	0.0960069	1.02372	0.952061	1.10077
		rs60274479	0.0187716	0.0362983	0.605052	-0.0523731	0.0899163	1.01895	0.948975	1.09408
		rs61249479	-0.025478	0.0422677	0.546658	-0.108323	0.0573668	0.974844	0.897338	1.05904
		rs71405394	0.00599794	0.032344	0.852882	-0.0573963	0.0693922	1.00602	0.94422	1.07186
		rs73232831	0.00968485	0.0263802	0.713525	-0.0420204	0.0613901	1.00973	0.95885	1.06331
		rs9423647	0.0413963	0.0388657	0.286824	-0.0347803	0.117573	1.04227	0.965818	1.12476
		All - Inverse variance weighted	0.0242408	0.0100829	0.0162105	0.00447826	0.0440033	1.02454	1.00449	1.04499
		All - MR Egger	-0.0151434	0.0324047	0.64939	-0.0786566	0.0483697	0.984971	0.924357	1.04956
	Proteobacteria.id.2375	SNP	b	se	p	lo_ci	up_ci	or	or_lci95	or_uci95
		rs10750258	0.0197664	0.0386178	0.608758	-0.0559245	0.0954573	1.01996	0.945611	1.10016
		rs11126162	0.0281272	0.0473591	0.55257	-0.0646966	0.120951	1.02853	0.937352	1.12857
		rs11715072	0.0448394	0.0400161	0.262486	-0.0335921	0.123271	1.04586	0.966966	1.13119
		rs12150865	-0.00226274	0.0355744	0.949284	-0.0719885	0.0674631	0.99774	0.930542	1.06979
		rs12467198	0.0420236	0.0393136	0.2851	-0.0350311	0.119078	1.04292	0.965575	1.12646
		rs2347697	0.0392229	0.0385675	0.309156	-0.0363694	0.114815	1.04	0.964284	1.12167
		rs2532663	-0.00629292	0.0309244	0.838749	-0.0669048	0.054319	0.993727	0.935284	1.05582
		rs312757	-0.0422094	0.0385732	0.273837	-0.117813	0.033394	0.958669	0.888862	1.03396
		rs3890996	-0.0163439	0.0392563	0.677164	-0.0932863	0.0605986	0.983789	0.910933	1.06247
		rs4340090	0.0736811	0.0404725	0.0686797	-0.00564506	0.153007	1.07646	0.994371	1.16533
		rs6707783	-0.0254525	0.0373523	0.495607	-0.0986631	0.0477581	0.974869	0.906048	1.04892
		rs72771021	0.0414815	0.0319657	0.194395	-0.0211713	0.104134	1.04235	0.979051	1.10975
		rs74757828	0.0836586	0.0389229	0.0316074	0.00736969	0.159948	1.08726	1.0074	1.17345
		rs922773	0.0190697	0.032894	0.562096	-0.0454026	0.083542	1.01925	0.955613	1.08713
		All - Inverse variance weighted	0.0198069	0.00994682	0.0464497	0.000311177	0.0393027	1.02	1.00031	1.04009
		All - MR Egger	0.0352386	0.0310608	0.278738	-0.0256406	0.0961179	1.03587	0.974685	1.10089
Hip pain	Mollicutes.id.3920	rs10108398	-0.0208794	0.0378569	0.581267	-0.0950788	0.0533201	0.979337	0.909301	1.05477
		rs11890098	-0.0249562	0.0405334	0.538097	-0.104402	0.0544894	0.975353	0.900863	1.056
		rs12566890	0.00452616	0.048109	0.925045	-0.0897675	0.0988199	1.00454	0.914144	1.10387
		rs17214486	-0.0139936	0.0437524	0.749092	-0.0997484	0.0717612	0.986104	0.905065	1.0744
		rs2464826	-0.0431032	0.0428752	0.314745	-0.127139	0.0409323	0.957813	0.880612	1.04178
		rs28537087	-0.038275	0.0475897	0.421241	-0.131551	0.0550008	0.962448	0.876735	1.05654
		rs3768491	0.0124005	0.0421621	0.76867	-0.0702372	0.0950383	1.01248	0.932173	1.0997
		rs4885016	-0.0611429	0.0444533	0.168995	-0.148271	0.0259856	0.940689	0.862197	1.02633
		rs6043847	-0.0332886	0.047052	0.479264	-0.12551	0.0589332	0.967259	0.882047	1.0607
		rs72901605	-0.0277	0.038913	0.476561	-0.103969	0.0485695	0.97268	0.901253	1.04977
		rs74603314	-0.0207886	0.0279555	0.457098	-0.0755814	0.0340041	0.979426	0.927204	1.03459
		rs78169027	-0.0243555	0.0408968	0.551487	-0.104513	0.0558024	0.975939	0.900763	1.05739
		All - Inverse variance weighted	-0.0238095	0.0117005	0.0418586	-0.0467424	-0.000876641	0.976472	0.954333	0.999124
		All - MR Egger	-0.0296632	0.0378826	0.451755	-0.103913	0.0445867	0.970772	0.901304	1.0456
	Porphyromonadaceae.id.94	rs10119172	-0.00308893	0.0474536	0.948099	-0.096098	0.0899202	0.996916	0.908375	1.09409
		rs10762312	0.0731735	0.0565217	0.195455	-0.0376091	0.183956	1.07592	0.963089	1.20196
		rs10858364	-0.0301992	0.0567765	0.594798	-0.141481	0.0810828	0.970252	0.868071	1.08446
		rs17065783	0.133763	0.0508518	0.00852749	0.034093	0.233432	1.14312	1.03468	1.26293
		rs1980561	0.0935202	0.0552695	0.0906319	-0.0148082	0.201848	1.09803	0.985301	1.22366
		rs3111851	-0.00928784	0.0513928	0.856585	-0.110018	0.0914421	0.990755	0.895818	1.09575
		rs35233670	0.0340691	0.0548994	0.53488	-0.0735336	0.141672	1.03466	0.929105	1.1522
		rs35961441	0.0274531	0.0511502	0.591465	-0.0728014	0.127708	1.02783	0.929785	1.13622
		rs6953849	-0.0307311	0.0512699	0.548907	-0.13122	0.0697578	0.969736	0.877025	1.07225
		rs7330827	0.0404959	0.0482446	0.401252	-0.0540636	0.135055	1.04133	0.947372	1.1446
		rs864093	0.0651013	0.0541129	0.228951	-0.04096	0.171162	1.06727	0.959868	1.18668
		All - Inverse variance weighted	0.0349583	0.0157949	0.0268791	0.00400035	0.0659163	1.03558	1.00401	1.06814
		All - MR Egger	-0.0285974	0.0705686	0.694763	-0.166912	0.109717	0.971808	0.846274	1.11596
	Adlercreutzia.id.812	SNP	b	se	p	lo_ci	up_ci	or	or_lci95	or_uci95
		rs1046175	0.0128494	0.0351915	0.715016	-0.0561259	0.0818247	1.01293	0.94542	1.08527
		rs11604400	0.0276256	0.0397373	0.486927	-0.0502596	0.105511	1.02801	0.950983	1.11128
		rs12522517	0.0665886	0.0369714	0.0716896	-0.00587534	0.139052	1.06886	0.994142	1.14918
		rs13231526	0.0235633	0.0342865	0.491927	-0.0436383	0.0907649	1.02384	0.9573	1.09501
		rs2147798	-0.00316792	0.0357665	0.929422	-0.0732702	0.0669344	0.996837	0.92935	1.06923
		rs2717140	0.0124126	0.0355166	0.726722	-0.0571998	0.0820251	1.01249	0.944405	1.08548
		rs55719207	0.0438423	0.0373054	0.239904	-0.0292762	0.116961	1.04482	0.971148	1.12408
		rs6664405	0.0554393	0.0376781	0.141185	-0.0184098	0.129288	1.057	0.981759	1.13802
		rs7680684	0.0469109	0.0340345	0.1681	-0.0197967	0.113619	1.04803	0.980398	1.12032
		rs80078995	0.0185255	0.035101	0.597655	-0.0502725	0.0873235	1.0187	0.95097	1.09125
		rs9490822	0.0470845	0.0354861	0.184561	-0.0224684	0.116637	1.04821	0.977782	1.12371
		rs9915817	-0.00932149	0.0372767	0.802539	-0.0823838	0.0637408	0.990722	0.920918	1.06582
		All - Inverse variance weighted	0.0283159	0.0104206	0.00658142	0.00789163	0.0487402	1.02872	1.00792	1.04995
		All - MR Egger	0.0109172	0.0504882	0.833154	-0.0880397	0.109874	1.01098	0.915725	1.11614
	Eisenbergiella.id.11304	SNP	b	se	p	lo_ci	up_ci	or	or_lci95	or_uci95
		rs11027642	-0.0134014	0.0303919	0.659246	-0.0729695	0.0461666	0.986688	0.929629	1.04725
		rs11079158	-0.017444	0.030101	0.562243	-0.076442	0.0415541	0.982707	0.926407	1.04243
		rs11938607	-0.0507977	0.0314661	0.106449	-0.112471	0.0108759	0.950471	0.893623	1.01094
		rs12257723	0.0317507	0.030186	0.292876	-0.027414	0.0909153	1.03226	0.972958	1.09518
		rs12278566	0.0354567	0.0293821	0.227529	-0.0221321	0.0930456	1.03609	0.978111	1.09751
		rs12710729	-0.0338914	0.0303407	0.263983	-0.0933592	0.0255764	0.966677	0.910866	1.02591
		rs13258851	-0.0358949	0.0313173	0.251726	-0.0972769	0.0254871	0.964742	0.907305	1.02581
		rs1508033	-0.0606549	0.0295954	0.0404162	-0.118662	-0.00264789	0.941148	0.888108	0.997356
		rs1553971	-0.0196682	0.0298741	0.510302	-0.0782215	0.0388851	0.980524	0.92476	1.03965
		rs2683098	-0.0113757	0.0294865	0.699649	-0.0691693	0.0464178	0.988689	0.933169	1.04751
		rs3812426	-0.0375545	0.0286932	0.190591	-0.0937931	0.0186841	0.963142	0.910471	1.01886
		rs4462860	0.00429327	0.0294836	0.884225	-0.0534946	0.0620811	1.0043	0.947911	1.06405
		All - Inverse variance weighted	-0.0170683	0.00865961	0.0487204	-0.0340412	-9.55e-05	0.983076	0.966532	0.999904
		All - MR Egger	0.0199021	0.0686265	0.777737	-0.114606	0.15441	1.0201	0.891718	1.16697
	Roseburia.id.2012	SNP	b	se	p	lo_ci	up_ci	or	or_lci95	or_uci95
		rs116270582	0.00453549	0.0348132	0.896344	-0.0636984	0.0727694	1.00455	0.938288	1.07548
		rs12740451	0.102521	0.0534666	0.0551779	-0.00227378	0.207315	1.10796	0.997729	1.23037
		rs147990086	-0.0425116	0.05342	0.426149	-0.147215	0.0621917	0.958379	0.863109	1.06417
		rs16910295	0.012709	0.0516368	0.805588	-0.0884992	0.113917	1.01279	0.915304	1.12066
		rs2034589	0.0416468	0.0497715	0.402727	-0.0559052	0.139199	1.04253	0.945629	1.14935
		rs2160994	-0.0256736	0.0490994	0.601051	-0.121908	0.0705613	0.974653	0.885229	1.07311
		rs2943022	0.00622865	0.0528687	0.906215	-0.097394	0.109851	1.00625	0.907199	1.11611
		rs302266	0.0551208	0.0526597	0.295222	-0.0480923	0.158334	1.05667	0.953046	1.17156
		rs329182	0.0110532	0.0544478	0.839131	-0.0956645	0.117771	1.01111	0.908769	1.12499
		rs4748237	0.0315115	0.0535523	0.556247	-0.073451	0.136474	1.03201	0.929182	1.14623
		rs55858165	0.0191162	0.0318609	0.548515	-0.0433313	0.0815636	1.0193	0.957594	1.08498
		rs57466170	0.0165559	0.0616253	0.788196	-0.10423	0.137341	1.01669	0.901018	1.14722
		rs6445851	0.0286722	0.0530382	0.588787	-0.0752827	0.132627	1.02909	0.927481	1.14182
		rs6930661	0.107997	0.050617	0.032874	0.00878808	0.207207	1.11404	1.00883	1.23024
		rs75326254	0.06557	0.0506597	0.195554	-0.033723	0.164863	1.06777	0.966839	1.17923
		rs78753150	0.0998382	0.0559803	0.0745129	-0.00988325	0.20956	1.10499	0.990165	1.23313
		rs9300744	0.0833465	0.0520765	0.109496	-0.0187234	0.185416	1.08692	0.981451	1.20372
		All - Inverse variance weighted	0.0328195	0.0117892	0.00537167	0.00971264	0.0559264	1.03336	1.00976	1.05752
		All - MR Egger	0.041209	0.0318383	0.215127	-0.0211941	0.103612	1.04207	0.979029	1.10917
	Bacteroidales.id.913	SNP	b	se	p	lo_ci	up_ci	or	or_lci95	or_uci95
		rs11146701	-0.0581435	0.0554483	0.294359	-0.166822	0.0505353	0.943515	0.84635	1.05183
		rs111845179	0.0244141	0.0544902	0.654121	-0.0823867	0.131215	1.02471	0.920916	1.14021
		rs13291169	-0.0998859	0.0521528	0.0554598	-0.202105	0.0023335	0.904941	0.817009	1.00234
		rs17343978	-0.0405123	0.0538535	0.451889	-0.146065	0.0650406	0.960297	0.864101	1.0672
		rs2032750	0.00166689	0.0509787	0.973916	-0.0982514	0.101585	1.00167	0.906421	1.10692
		rs4146051	0.0554844	0.0575463	0.334961	-0.0573063	0.168275	1.05705	0.944305	1.18326
		rs4916508	-0.0469182	0.0555909	0.398675	-0.155876	0.0620399	0.954165	0.855665	1.064
		rs55773148	-0.0898904	0.0493069	0.0682916	-0.186532	0.00675119	0.914031	0.829832	1.00677
		rs62531359	-0.0694381	0.0571028	0.223978	-0.18136	0.0424834	0.932918	0.834135	1.0434
		rs62575403	0.00374469	0.0421489	0.929206	-0.0788672	0.0863566	1.00375	0.924163	1.09019
		rs72706335	-0.0194867	0.0267136	0.465716	-0.0718453	0.0328719	0.980702	0.930675	1.03342
		rs7546249	-0.0345997	0.0510063	0.497555	-0.134572	0.0653726	0.965992	0.87409	1.06756
		rs7631304	-0.0317258	0.0529135	0.548787	-0.135436	0.0719847	0.968772	0.873335	1.07464
		rs79585701	-0.0340885	0.0548043	0.53394	-0.141505	0.073328	0.966486	0.868051	1.07608
		rs929878	-0.0202639	0.0537075	0.70595	-0.125531	0.0850028	0.97994	0.882029	1.08872
		All - Inverse variance weighted	-0.028612	0.0124147	0.0211842	-0.0529449	-0.00427916	0.971793	0.948432	0.99573
		All - MR Egger	-0.00757273	0.0288442	0.79702	-0.0641074	0.048962	0.992456	0.937904	1.05018
	Tenericutes.id.3919	SNP	b	se	p	lo_ci	up_ci	or	or_lci95	or_uci95
		rs10108398	-0.0208794	0.0378569	0.581267	-0.0950788	0.0533201	0.979337	0.909301	1.05477
		rs11890098	-0.0249562	0.0405334	0.538097	-0.104402	0.0544894	0.975353	0.900863	1.056
		rs12566890	0.00452616	0.048109	0.925045	-0.0897675	0.0988199	1.00454	0.914144	1.10387
		rs17214486	-0.0139936	0.0437524	0.749092	-0.0997484	0.0717612	0.986104	0.905065	1.0744
		rs2464826	-0.0431032	0.0428752	0.314745	-0.127139	0.0409323	0.957813	0.880612	1.04178
		rs28537087	-0.038275	0.0475897	0.421241	-0.131551	0.0550008	0.962448	0.876735	1.05654
		rs3768491	0.0124005	0.0421621	0.76867	-0.0702372	0.0950383	1.01248	0.932173	1.0997
		rs4885016	-0.0611429	0.0444533	0.168995	-0.148271	0.0259856	0.940689	0.862197	1.02633
		rs6043847	-0.0332886	0.047052	0.479264	-0.12551	0.0589332	0.967259	0.882047	1.0607
		rs72901605	-0.0277	0.038913	0.476561	-0.103969	0.0485695	0.97268	0.901253	1.04977
		rs74603314	-0.0207886	0.0279555	0.457098	-0.0755814	0.0340041	0.979426	0.927204	1.03459
		rs78169027	-0.0243555	0.0408968	0.551487	-0.104513	0.0558024	0.975939	0.900763	1.05739
		All - Inverse variance weighted	-0.0238095	0.0117005	0.0418586	-0.0467424	-0.000876641	0.976472	0.954333	0.999124
		All - MR Egger	-0.0296632	0.0378826	0.451755	-0.103913	0.0445867	0.970772	0.901304	1.0456
	Bacteroidia.id.912	SNP	b	se	p	lo_ci	up_ci	or	or_lci95	or_uci95
		rs11146701	-0.0581435	0.0554483	0.294359	-0.166822	0.0505353	0.943515	0.84635	1.05183
		rs111845179	0.0244141	0.0544902	0.654121	-0.0823867	0.131215	1.02471	0.920916	1.14021
		rs13291169	-0.0998859	0.0521528	0.0554598	-0.202105	0.0023335	0.904941	0.817009	1.00234
		rs17343978	-0.0405123	0.0538535	0.451889	-0.146065	0.0650406	0.960297	0.864101	1.0672
		rs2032750	0.00166689	0.0509787	0.973916	-0.0982514	0.101585	1.00167	0.906421	1.10692
		rs4146051	0.0554844	0.0575463	0.334961	-0.0573063	0.168275	1.05705	0.944305	1.18326
		rs4916508	-0.0469182	0.0555909	0.398675	-0.155876	0.0620399	0.954165	0.855665	1.064
		rs55773148	-0.0898904	0.0493069	0.0682916	-0.186532	0.00675119	0.914031	0.829832	1.00677
		rs62531359	-0.0694381	0.0571028	0.223978	-0.18136	0.0424834	0.932918	0.834135	1.0434
		rs62575403	0.00374469	0.0421489	0.929206	-0.0788672	0.0863566	1.00375	0.924163	1.09019
		rs72706335	-0.0194867	0.0267136	0.465716	-0.0718453	0.0328719	0.980702	0.930675	1.03342
		rs7546249	-0.0345997	0.0510063	0.497555	-0.134572	0.0653726	0.965992	0.87409	1.06756
		rs7631304	-0.0317258	0.0529135	0.548787	-0.135436	0.0719847	0.968772	0.873335	1.07464
		rs79585701	-0.0340885	0.0548043	0.53394	-0.141505	0.073328	0.966486	0.868051	1.07608
		rs929878	-0.0202639	0.0537075	0.70595	-0.125531	0.0850028	0.97994	0.882029	1.08872
		All - Inverse variance weighted	-0.028612	0.0124147	0.0211842	-0.0529449	-0.00427916	0.971793	0.948432	0.99573
		All - MR Egger	-0.00757273	0.0288442	0.79702	-0.0641074	0.048962	0.992456	0.937904	1.05018
neck or shoulder pain	Rhodospirillaceae.id.271	SNP	b	se	p	lo_ci	up_ci	or	or_lci95	or_uci95
		rs1035406	0.0280386	0.0277901	0.313003	-0.02643	0.0825072	1.02844	0.973916	1.08601
		rs11591293	0.0107758	0.0276275	0.696508	-0.0433741	0.0649257	1.01083	0.957553	1.06708
		rs12977163	0.00960748	0.0282581	0.733864	-0.0457784	0.0649934	1.00965	0.955254	1.06715
		rs13336560	-0.0113404	0.0299609	0.705055	-0.0700637	0.0473829	0.988724	0.932334	1.04852
		rs1549633	-0.0272144	0.0284863	0.3394	-0.0830475	0.0286187	0.973153	0.920307	1.02903
		rs1923415	-0.0279898	0.0304168	0.357463	-0.0876067	0.0316271	0.972398	0.916121	1.03213
		rs3754624	0.0135682	0.0265462	0.60927	-0.0384624	0.0655988	1.01366	0.962268	1.0678
		rs4278423	0.0514927	0.0285395	0.0711904	-0.00444471	0.10743	1.05284	0.995565	1.11341
		rs4822789	0.046389	0.0288217	0.107504	-0.0101016	0.10288	1.04748	0.989949	1.10836
		rs55876211	-0.0165419	0.0284423	0.56084	-0.0722887	0.039205	0.983594	0.930262	1.03998
		rs61933850	-0.00328875	0.0248686	0.89479	-0.0520312	0.0454537	0.996717	0.949299	1.0465
		rs6679026	0.0455935	0.0293756	0.120641	-0.0119826	0.10317	1.04665	0.988089	1.10868
		rs7001029	-0.0327187	0.0295332	0.267923	-0.0906038	0.0251665	0.967811	0.91338	1.02549
		rs72714493	0.0714658	0.0283656	0.0117539	0.0158691	0.127062	1.07408	1.016	1.13549
		rs74354280	0.00328196	0.0293042	0.910826	-0.0541543	0.0607183	1.00329	0.947286	1.0626
		rs76784716	0.0680928	0.0294607	0.0208158	0.0103498	0.125836	1.07046	1.0104	1.1341
		rs9813022	0.0448887	0.0260312	0.0846319	-0.00613241	0.0959098	1.04591	0.993886	1.10066
		All - Inverse variance weighted	0.0164682	0.00806175	0.0410767	0.000667152	0.0322692	1.0166	1.00067	1.0328
		All - MR Egger	0.00876467	0.0386659	0.823735	-0.0670206	0.0845499	1.0088	0.935176	1.08823
	unknownfamily.id.1000001	SNP	b	se	p	lo_ci	up_ci	or	or_lci95	or_uci95
		rs11150282	-0.00558841	0.0220318	0.799764	-0.0487707	0.0375938	0.994427	0.9524	1.03831
		rs113884518	0.0144351	0.0209756	0.491336	-0.026677	0.0555472	1.01454	0.973676	1.05712
		rs1221147	0.0448225	0.0238736	0.06045	-0.00196964	0.0916147	1.04584	0.998032	1.09594
		rs16851659	-0.00451823	0.0226203	0.841682	-0.0488541	0.0398176	0.995492	0.95232	1.04062
		rs28678345	0.0561903	0.0216772	0.00953808	0.013703	0.0986776	1.0578	1.0138	1.10371
		rs367480	0.00420793	0.024216	0.862049	-0.0432555	0.0516713	1.00422	0.957667	1.05303
		rs4129395	0.016874	0.0223691	0.450645	-0.0269696	0.0607175	1.01702	0.973391	1.0626
		rs73074665	0.0141726	0.0234751	0.546022	-0.0318385	0.0601838	1.01427	0.968663	1.06203
		rs789069	0.019209	0.0258518	0.457455	-0.0314605	0.0698784	1.01939	0.969029	1.07238
		rs79790072	0.00806134	0.019758	0.683271	-0.0306644	0.0467871	1.00809	0.969801	1.0479
		rs8028558	0.00467724	0.0244913	0.848545	-0.0433256	0.0526801	1.00469	0.9576	1.05409
		rs9864379	0.0166152	0.0202024	0.410828	-0.0229815	0.056212	1.01675	0.977281	1.05782
		All - Inverse variance weighted	0.0157228	0.00647339	0.0151471	0.003035	0.0284107	1.01585	1.00304	1.02882
		All - MR Egger	0.0387371	0.0192528	0.0719315	0.00100159	0.0764726	1.0395	1.001	1.07947
	Eubacteriumnodatumgroup	SNP	b	se	p	lo_ci	up_ci	or	or_lci95	or_uci95
		rs10263623	0.030705	0.0168914	0.0690959	-0.00240208	0.0638121	1.03118	0.997601	1.06589
		rs10458299	0.0206631	0.019015	0.277179	-0.0166062	0.0579324	1.02088	0.983531	1.05964
		rs11006576	0.0114272	0.0183802	0.534131	-0.0245979	0.0474523	1.01149	0.975702	1.0486
		rs113893692	0.0159639	0.0169899	0.347417	-0.0173363	0.0492641	1.01609	0.982813	1.0505
		rs34297067	0.0130885	0.0149173	0.380268	-0.0161494	0.0423264	1.01317	0.98398	1.04323
		rs61841040	0.0284222	0.0173462	0.101312	-0.00557631	0.0624206	1.02883	0.994439	1.06441
		rs6818880	0.00280636	0.0184366	0.879016	-0.0333293	0.0389421	1.00281	0.96722	1.03971
		rs77910827	-0.0119083	0.0167698	0.477641	-0.0447771	0.0209605	0.988162	0.956211	1.02118
		rs7827125	0.0087678	0.0183654	0.633071	-0.0272283	0.0447639	1.00881	0.973139	1.04578
		rs7880204	-0.0164972	0.0180934	0.361885	-0.0519604	0.0189659	0.983638	0.949367	1.01915
		rs9425984	0.0251012	0.0182892	0.16992	-0.0107456	0.060948	1.02542	0.989312	1.06284
		All - Inverse variance weighted	0.011764	0.00526906	0.0255717	0.00143663	0.0220913	1.01183	1.00144	1.02234
		All - MR Egger	0.0263926	0.0231602	0.283887	-0.0190014	0.0717867	1.02674	0.981178	1.07443
	Faecalibacterium.id.2057	SNP	b	se	p	lo_ci	up_ci	or	or_lci95	or_uci95
		rs10927394	-0.0278827	0.0252395	0.269278	-0.077352	0.0215867	0.972502	0.925564	1.02182
		rs114946999	-0.0206386	0.03985	0.604523	-0.0987447	0.0574675	0.979573	0.905974	1.05915
		rs11776390	-0.0231612	0.0406203	0.568551	-0.102777	0.0564546	0.977105	0.902328	1.05808
		rs12320842	-0.0123391	0.0336416	0.713783	-0.0782766	0.0535984	0.987737	0.924709	1.05506
		rs1271565	-0.0760207	0.0390345	0.0514721	-0.152528	0.000487031	0.926797	0.858535	1.00049
		rs12753492	-0.0803844	0.0428971	0.0609456	-0.164463	0.00369387	0.922762	0.848349	1.0037
		rs2835874	-0.00385573	0.0443435	0.93071	-0.0907691	0.0830576	0.996152	0.913229	1.0866
		rs28376661	-0.0897774	0.0409172	0.0282264	-0.169975	-0.00957976	0.914135	0.843686	0.990466
		rs61875484	-0.0355684	0.0421719	0.398996	-0.118225	0.0470884	0.965057	0.888496	1.04821
		rs6910935	-0.0162739	0.0314522	0.604865	-0.0779201	0.0453723	0.983858	0.925038	1.04642
		rs75499067	0.0167093	0.0201751	0.407549	-0.0228339	0.0562525	1.01685	0.977425	1.05786
		rs79656633	-0.00694792	0.0324884	0.830658	-0.0706252	0.0567294	0.993076	0.931811	1.05837
		rs9536330	0.00168304	0.0427922	0.968627	-0.0821896	0.0855557	1.00168	0.921097	1.08932
		All - Inverse variance weighted	-0.0201358	0.00931768	0.0306926	-0.0383985	-0.00187318	0.980066	0.962329	0.998129
		All - MR Egger	0.0164113	0.019366	0.414812	-0.021546	0.0543686	1.01655	0.978685	1.05587
	LachnospiraceaeUCG010.id	SNP	b	se	p	lo_ci	up_ci	or	or_lci95	or_uci95
		rs10414815	-0.0085419	0.0304863	0.779333	-0.068295	0.0512112	0.991494	0.933985	1.05255
		rs11192447	-0.0463355	0.0329177	0.159244	-0.110854	0.0181832	0.954722	0.895069	1.01835
		rs12346653	0.0117029	0.0355366	0.741913	-0.0579488	0.0813547	1.01177	0.943698	1.08476
		rs17730011	-0.0501954	0.0374517	0.180158	-0.123601	0.02321	0.951044	0.883733	1.02348
		rs2153460	-0.0300611	0.0374636	0.422317	-0.10349	0.0433675	0.970386	0.901685	1.04432
		rs2833528	0.00353821	0.0370989	0.924019	-0.0691757	0.0762521	1.00354	0.933163	1.07923
		rs336138	-0.0171258	0.0349658	0.624284	-0.0856587	0.0514071	0.98302	0.917907	1.05275
		rs4576377	-0.020568	0.0361296	0.569165	-0.091382	0.0502461	0.979642	0.912669	1.05153
		rs72761829	-0.0620562	0.03441	0.0713204	-0.1295	0.0053875	0.93983	0.878535	1.0054
		rs72894957	-0.0338268	0.0216773	0.118648	-0.0763143	0.00866068	0.966739	0.926525	1.0087
		rs74315802	-0.0053213	0.0348691	0.878708	-0.0736648	0.0630222	0.994693	0.928983	1.06505
		rs9981767	-0.0129755	0.0330708	0.694795	-0.0777942	0.0518432	0.987108	0.925155	1.05321
		All - Inverse variance weighted	-0.0238267	0.0094339	0.0115484	-0.0423172	-0.00533631	0.976455	0.958566	0.994678
		All - MR Egger	-0.0496447	0.0260145	0.0854377	-0.100633	0.00134373	0.951567	0.904265	1.00134
	Methanobrevibacter.id.123	SNP	b	se	p	lo_ci	up_ci	or	or_lci95	or_uci95
		rs10202904	0.0233872	0.0180657	0.19547	-0.0120215	0.058796	1.02366	0.98805	1.06056
		rs11018665	-0.000199088	0.0186398	0.991478	-0.0367331	0.0363349	0.999801	0.963933	1.037
		rs1334944	0.0262893	0.0185414	0.156227	-0.0100517	0.0626304	1.02664	0.989999	1.06463
		rs4779844	0.00183323	0.0191066	0.923562	-0.0356157	0.0392822	1.00183	0.965011	1.04006
		rs4802933	-0.0143825	0.0199516	0.470992	-0.0534877	0.0247228	0.98572	0.947918	1.02503
		rs6776814	0.0216229	0.0179283	0.227789	-0.0135166	0.0567624	1.02186	0.986574	1.0584
		rs76029318	0.00853471	0.0173339	0.622457	-0.0254397	0.0425092	1.00857	0.974881	1.04343
		rs894996	0.0475406	0.0175869	0.00686794	0.0130703	0.082011	1.04869	1.01316	1.08547
		All - Inverse variance weighted	0.0153872	0.00675342	0.0227007	0.00215052	0.0286239	1.01551	1.00215	1.02904
		All - MR Egger	0.0399003	0.0255866	0.169912	-0.0102494	0.09005	1.04071	0.989803	1.09423
	unknowngenus.id.100000121	SNP	b	se	p	lo_ci	up_ci	or	or_lci95	or_uci95
		rs11150282	-0.00558841	0.0220318	0.799764	-0.0487707	0.0375938	0.994427	0.9524	1.03831
		rs113884518	0.0144351	0.0209756	0.491336	-0.026677	0.0555472	1.01454	0.973676	1.05712
		rs1221147	0.0448225	0.0238736	0.06045	-0.00196964	0.0916147	1.04584	0.998032	1.09594
		rs16851659	-0.00451823	0.0226203	0.841682	-0.0488541	0.0398176	0.995492	0.95232	1.04062
		rs28678345	0.0561903	0.0216772	0.00953808	0.013703	0.0986776	1.0578	1.0138	1.10371
		rs367480	0.00420793	0.024216	0.862049	-0.0432555	0.0516713	1.00422	0.957667	1.05303
		rs4129395	0.016874	0.0223691	0.450645	-0.0269696	0.0607175	1.01702	0.973391	1.0626
		rs73074665	0.0141726	0.0234751	0.546022	-0.0318385	0.0601838	1.01427	0.968663	1.06203
		rs789069	0.019209	0.0258518	0.457455	-0.0314605	0.0698784	1.01939	0.969029	1.07238
		rs79790072	0.00806134	0.019758	0.683271	-0.0306644	0.0467871	1.00809	0.969801	1.0479
		rs8028558	0.00467724	0.0244913	0.848545	-0.0433256	0.0526801	1.00469	0.9576	1.05409
		rs9864379	0.0166152	0.0202024	0.410828	-0.0229815	0.056212	1.01675	0.977281	1.05782
		All - Inverse variance weighted	0.0157228	0.00647339	0.0151471	0.003035	0.0284107	1.01585	1.00304	1.02882
		All - MR Egger	0.0387371	0.0192528	0.0719315	0.00100159	0.0764726	1.0395	1.001	1.07947
	Gastranaerophilales.id.15	SNP	b	se	p	lo_ci	up_ci	or	or_lci95	or_uci95
		rs11150282	-0.00558841	0.0220318	0.799764	-0.0487707	0.0375938	0.994427	0.9524	1.03831
		rs113884518	0.0144351	0.0209756	0.491336	-0.026677	0.0555472	1.01454	0.973676	1.05712
		rs1221147	0.0448225	0.0238736	0.06045	-0.00196964	0.0916147	1.04584	0.998032	1.09594
		rs16851659	-0.00451823	0.0226203	0.841682	-0.0488541	0.0398176	0.995492	0.95232	1.04062
		rs28678345	0.0561903	0.0216772	0.00953808	0.013703	0.0986776	1.0578	1.0138	1.10371
		rs367480	0.00420793	0.024216	0.862049	-0.0432555	0.0516713	1.00422	0.957667	1.05303
		rs4129395	0.0168739	0.0223691	0.450645	-0.0269696	0.0607175	1.01702	0.973391	1.0626
		rs73074665	0.0141726	0.0234751	0.546022	-0.0318385	0.0601838	1.01427	0.968663	1.06203
		rs789069	0.019209	0.0258518	0.457455	-0.0314605	0.0698784	1.01939	0.969029	1.07238
		rs79790072	0.00806134	0.019758	0.683271	-0.0306644	0.0467871	1.00809	0.969801	1.0479
		rs8028558	0.00467724	0.0244913	0.848545	-0.0433256	0.0526801	1.00469	0.9576	1.05409
		rs9864379	0.0166152	0.0202024	0.410828	-0.0229815	0.056212	1.01675	0.977281	1.05782
		All - Inverse variance weighted	0.0157228	0.00647339	0.0151471	0.003035	0.0284107	1.01585	1.00304	1.02882
		All - MR Egger	0.0387371	0.0192528	0.0719315	0.00100159	0.0764726	1.0395	1.001	1.07947
	Melainabacteria.id.1589	SNP	b	se	p	lo_ci	up_ci	or	or_lci95	or_uci95
		rs10148250	0.0194251	0.023489	0.408245	-0.0266133	0.0654634	1.01961	0.973738	1.06765
		rs10738747	-0.0216623	0.0246814	0.380121	-0.0700379	0.0267134	0.978571	0.932358	1.02707
		rs11150282	-0.00554809	0.0218728	0.799764	-0.0484189	0.0373227	0.994467	0.952735	1.03803
		rs113884518	0.0144743	0.0210325	0.491336	-0.0267495	0.055698	1.01458	0.973605	1.05728
		rs1221147	0.0456675	0.0243236	0.06045	-0.00200677	0.0933417	1.04673	0.997995	1.09784
		rs16851659	-0.00451352	0.0225967	0.841682	-0.0488031	0.0397761	0.995497	0.952369	1.04058
		rs28678345	0.0557286	0.0214991	0.00953808	0.0135904	0.0978668	1.05731	1.01368	1.10282
		rs367480	0.00422837	0.0243337	0.862049	-0.0434657	0.0519224	1.00424	0.957465	1.05329
		rs4129395	0.017026	0.0225707	0.450645	-0.0272126	0.0612647	1.01717	0.973154	1.06318
		rs73074665	0.0140375	0.0232513	0.546022	-0.031535	0.0596101	1.01414	0.968957	1.06142
		rs789069	0.0193186	0.0259992	0.457455	-0.0316399	0.0702771	1.01951	0.968855	1.07281
		rs79790072	0.00803932	0.0197041	0.683271	-0.0305806	0.0466593	1.00807	0.969882	1.04776
		rs9864379	0.0166971	0.0203019	0.410828	-0.0230947	0.0564889	1.01684	0.97717	1.05811
		All - Inverse variance weighted	0.0142976	0.00625003	0.022161	0.00204749	0.0265476	1.0144	1.00205	1.0269
		All - MR Egger	0.0406566	0.0186575	0.0519462	0.00408795	0.0772253	1.04149	1.0041	1.08029

## Sheet: ST7
Supplementary Table 7. Instruments for gut metabolites
Outcome	exposure
Pain in joint	3-hydroxybutyrate(BHBA)	SNP	b	se	p	lo_ci	up_ci	or	or_lci95	or_uci95
		rs11224003	-0.185292	0.296391	0.531866	-0.766219	0.395635	0.830862	0.464767	1.48533
		rs11719883	-0.0639683	0.230109	0.781019	-0.514982	0.387045	0.938035	0.597512	1.47262
		rs13288937	0.0671801	0.220204	0.760304	-0.364419	0.498779	1.06949	0.6946	1.64671
		rs2295758	0.195631	0.253323	0.439961	-0.300882	0.692143	1.21608	0.740165	1.99799
		rs2711506	0.0316936	0.28502	0.91146	-0.526946	0.590333	1.0322	0.590405	1.80459
		rs4297577	-0.791437	0.29352	0.00701007	-1.36674	-0.216138	0.453193	0.254938	0.805624
		rs4838537	0.066244	0.0783937	0.398102	-0.0874077	0.219896	1.06849	0.916303	1.24595
		rs6493912	-0.979997	0.305351	0.00133004	-1.57848	-0.38151	0.375312	0.206288	0.682829
		rs7314742	0.146933	0.309469	0.634937	-0.459627	0.753493	1.15828	0.631519	2.12441
		rs8000457	0.072806	0.0957066	0.446824	-0.114779	0.260391	1.07552	0.891563	1.29744
		All - Inverse variance weighted	0.00540273	0.0765969	0.943768	-0.144727	0.155533	1.00542	0.865258	1.16828
		All - MR Egger	0.101135	0.10109	0.346392	-0.0970014	0.299271	1.10643	0.907555	1.34887
	Tryptophan	SNP	b	se	p	lo_ci	up_ci	or	or_lci95	or_uci95
		rs1000137	0.802042	1.84227	0.663305	-2.80881	4.4129	2.23009	0.0602766	82.508
		rs10007704	-0.66747	2.1925	0.760798	-4.96478	3.62984	0.513005	0.00697949	37.7067
		rs1013667	-2.06721	2.31752	0.372396	-6.60955	2.47512	0.126538	0.00134744	11.8831
		rs1016522	1.13994	1.60995	0.478907	-2.01555	4.29544	3.12659	0.133247	73.3642
		rs10225863	0.610505	2.30942	0.791507	-3.91596	5.13697	1.84136	0.0199214	170.2
		rs10495209	-5.85093	2.31213	0.011389	-10.3827	-1.31915	0.00287724	3.09634e-05	0.267364
		rs10784496	-2.30151	2.06931	0.266047	-6.35736	1.75434	0.100107	0.00173394	5.77962
		rs10807322	2.97377	2.18467	0.17345	-1.30818	7.25571	19.5655	0.270313	1416.17
		rs10836364	-3.00396	1.91699	0.117111	-6.76126	0.753344	0.0495903	0.00115776	2.12409
		rs10846667	1.90791	2.05398	0.35295	-2.1179	5.93372	6.73898	0.120284	377.556
		rs10881004	-0.0727676	2.31835	0.97496	-4.61673	4.4712	0.929817	0.00988506	87.4613
		rs10900784	1.0581	2.19526	0.62981	-3.2446	5.36081	2.8809	0.0389841	212.896
		rs10927101	2.68417	2.04626	0.189606	-1.3265	6.69485	14.6461	0.265404	808.232
		rs11201034	1.85567	2.17482	0.393521	-2.40699	6.11832	6.39597	0.0900864	454.102
		rs11654913	-2.86275	2.39071	0.231132	-7.54854	1.82304	0.0571115	0.000526878	6.19066
		rs11719675	-2.53032	2.25881	0.262628	-6.95758	1.89695	0.0796338	0.000951397	6.6655
		rs11720862	-1.64169	2.0217	0.416772	-5.60423	2.32085	0.193652	0.00368224	10.1843
		rs1179636	1.47818	2.05911	0.472836	-2.55768	5.51404	4.38495	0.0774843	248.151
		rs11802417	-3.92105	2.25712	0.0823537	-8.34501	0.50291	0.0198203	0.00023758	1.65353
		rs1220605	3.43883	2.15864	0.111149	-0.792111	7.66976	31.1504	0.452888	2142.57
		rs12278762	1.33077	2.15151	0.536227	-2.88619	5.54773	3.78396	0.0557882	256.655
		rs12468084	-1.16027	2.1164	0.583534	-5.30843	2.98788	0.3134	0.0049497	19.8435
		rs12533939	0.0193823	2.18449	0.992921	-4.26222	4.30098	1.01957	0.014091	73.7721
		rs1260326	4.826	2.30045	0.0359187	0.317109	9.33489	124.711	1.37315	11326.4
		rs13001325	-4.06918	2.44408	0.0959306	-8.85957	0.721222	0.0170915	0.000142016	2.05694
		rs13008096	1.62746	2.35647	0.489794	-2.99121	6.24614	5.09094	0.0502265	516.015
		rs13122250	-2.84194	1.53981	0.0649447	-5.85997	0.176095	0.0583127	0.00285134	1.19255
		rs1330918	0.941569	2.19634	0.668142	-3.36325	5.24639	2.564	0.0346226	189.879
		rs1373962	0.833102	1.88471	0.658466	-2.86093	4.52714	2.30044	0.0572153	92.4934
		rs1412972	0.661889	0.959922	0.490494	-1.21956	2.54334	1.93845	0.295361	12.722
		rs1418942	0.464788	2.42915	0.848261	-4.29635	5.22593	1.59168	0.0136182	186.033
		rs1508513	3.65695	2.47695	0.139839	-1.19787	8.51178	38.7431	0.301835	4973
		rs1519309	3.16425	2.46777	0.199762	-1.67258	8.00108	23.671	0.187761	2984.19
		rs154246	0.871649	1.9534	0.655437	-2.95702	4.70031	2.39085	0.0519738	109.982
		rs1559063	-1.09607	1.86134	0.555956	-4.74429	2.55216	0.334183	0.00870122	12.8348
		rs1663501	0.774145	1.95864	0.692661	-3.06479	4.61308	2.16874	0.0466636	100.794
		rs16836288	0.578491	1.43999	0.687881	-2.24389	3.40088	1.78335	0.106045	29.9904
		rs1697901	1.48092	2.04888	0.469805	-2.53488	5.49672	4.39699	0.0792713	243.891
		rs17698249	0.987441	2.37987	0.678205	-3.67711	5.65199	2.68436	0.025296	284.859
		rs17744500	-2.71634	2.25543	0.228452	-7.13699	1.7043	0.0661162	0.000795144	5.49756
		rs1790398	4.26033	1.95815	0.0295784	0.422355	8.09831	70.8336	1.52555	3288.91
		rs1852138	2.89515	2.35882	0.219682	-1.72813	7.51843	18.0862	0.177616	1841.68
		rs1871053	-2.51161	2.12743	0.237767	-6.68137	1.65814	0.0811372	0.00125406	5.24956
		rs1995960	1.71273	1.99589	0.390822	-2.19922	5.62468	5.54407	0.11089	277.183
		rs1997238	-0.295378	2.05535	0.885728	-4.32387	3.73311	0.74425	0.0132485	41.8091
		rs201262	-0.459819	2.00423	0.818539	-4.3881	3.46846	0.631398	0.0124243	32.0874
		rs207938	-2.41514	2.15636	0.26271	-6.6416	1.81132	0.0893549	0.00130494	6.11851
		rs2111118	2.05808	1.81384	0.25652	-1.49704	5.6132	7.83091	0.223791	274.02
		rs2126498	-5.26324	2.2583	0.0197734	-9.68951	-0.83697	0.00517851	6.193e-05	0.433021
		rs2178260	-1.09388	2.21653	0.621652	-5.43829	3.25052	0.334913	0.00434692	25.8038
		rs2216061	-4.71012	2.15086	0.0285329	-8.92579	-0.494439	0.00900373	0.000132916	0.609913
		rs2230532	-0.354606	1.88738	0.850968	-4.05387	3.34465	0.70145	0.0173551	28.3508
		rs2261659	1.18494	2.18763	0.588055	-3.10281	5.4727	3.2705	0.0449227	238.102
		rs2349729	3.04412	2.31327	0.188195	-1.48989	7.57814	20.9916	0.225397	1954.98
		rs2367059	0.962535	2.0219	0.634035	-3.00039	4.92546	2.61832	0.0497677	137.753
		rs2383131	-0.10183	2.19345	0.962972	-4.40099	4.19733	0.903183	0.0122652	66.5085
		rs2432	1.8824	2.01818	0.350962	-2.07322	5.83803	6.56927	0.12578	343.102
		rs2484178	-1.43126	2.25254	0.525168	-5.84623	2.98371	0.239007	0.00289077	19.761
		rs2505644	1.46815	1.86631	0.431481	-2.18982	5.12612	4.34121	0.111937	168.363
		rs2520117	3.56889	2.04546	0.0810225	-0.440217	7.57799	35.4772	0.643897	1954.71
		rs2580344	0.0232295	2.20118	0.99158	-4.29109	4.33755	1.0235	0.01369	76.5195
		rs2604365	-2.78818	2.1548	0.195685	-7.01158	1.43522	0.061533	0.000901382	4.20056
		rs2658761	0.181598	1.92863	0.924983	-3.59852	3.96172	1.19913	0.0273641	52.5476
		rs2662269	0.99588	2.32996	0.66907	-3.57083	5.56259	2.70711	0.0281324	260.497
		rs2688858	-0.261337	2.1565	0.903544	-4.48808	3.9654	0.770021	0.0112422	52.7415
		rs2722407	-0.569985	2.27878	0.802489	-5.0364	3.89643	0.565534	0.0064971	49.2264
		rs2769419	1.76151	2.33632	0.450868	-2.81768	6.34071	5.82125	0.0597443	567.2
		rs2798184	-0.854541	1.89119	0.651375	-4.56128	2.8522	0.425479	0.0104487	17.3258
		rs2834164	-2.10715	2.0484	0.303628	-6.12201	1.9077	0.121584	0.00219404	6.73759
		rs284191	1.6923	1.5958	0.288929	-1.43546	4.82006	5.43196	0.238006	123.973
		rs2868072	-1.09574	2.30191	0.634066	-5.60748	3.41601	0.334293	0.0036703	30.4476
		rs295142	1.98299	1.99481	0.320186	-1.92684	5.89282	7.26444	0.145608	362.426
		rs2966079	1.23075	2.22211	0.579673	-3.1246	5.58609	3.42378	0.0439546	266.691
		rs2970335	1.31328	2.26331	0.561747	-3.12281	5.74937	3.71837	0.0440334	313.994
		rs2977272	3.37512	2.15702	0.11765	-0.852639	7.60288	29.2278	0.426288	2003.96
		rs3742929	1.98648	2.10475	0.345268	-2.13883	6.1118	7.28984	0.117792	451.148
		rs3751181	-1.54898	2.2479	0.490775	-5.95487	2.85692	0.212465	0.00259318	17.4078
		rs3773729	-0.0821898	2.59393	0.974723	-5.16628	5.0019	0.921097	0.00570574	148.696
		rs3780494	2.43905	1.55983	0.117897	-0.61822	5.49632	11.4621	0.538903	243.792
		rs38271	2.31633	1.85467	0.211694	-1.31882	5.95148	10.1384	0.267451	384.323
		rs4063769	-0.152509	2.15243	0.943514	-4.37128	4.06626	0.858551	0.0126351	58.3383
		rs4144737	2.73195	2.42236	0.259401	-2.01587	7.47977	15.3628	0.133205	1771.83
		rs42162	0.417465	2.31667	0.856995	-4.12321	4.95814	1.51811	0.0161924	142.329
		rs428185	-0.82738	2.04701	0.686073	-4.83952	3.18476	0.437193	0.00791087	24.1614
		rs4306882	0.244986	1.62744	0.880343	-2.9448	3.43477	1.2776	0.0526126	31.0244
		rs430727	2.37458	2.28341	0.298374	-2.10091	6.85008	10.7465	0.122345	943.952
		rs4356783	3.22815	2.259	0.152999	-1.19948	7.65578	25.2328	0.30135	2112.82
		rs4611118	-3.05816	2.09811	0.144957	-7.17045	1.05413	0.0469741	0.000768974	2.86949
		rs4615256	-0.0258349	1.89881	0.989144	-3.7475	3.69583	0.974496	0.0235766	40.279
		rs4695138	-0.751585	1.77287	0.671612	-4.22641	2.72324	0.471619	0.0146048	15.2296
		rs4751282	-0.836378	2.06424	0.68535	-4.8823	3.20954	0.433277	0.00757958	24.7677
		rs4849291	-2.78512	2.34747	0.23545	-7.38616	1.81592	0.0617216	0.000619768	6.14673
		rs4870304	-2.31673	2.40729	0.335857	-7.03502	2.40155	0.0985953	0.000880504	11.0403
		rs4880888	0.512683	1.99895	0.797583	-3.40526	4.43062	1.66976	0.0331982	83.9839
		rs4926571	1.7448	1.96111	0.373628	-2.09898	5.58858	5.72476	0.122581	267.357
		rs4958379	-3.48938	1.89871	0.066097	-7.21085	0.232088	0.0305198	0.000738531	1.26123
		rs4972588	0.512793	2.00389	0.798029	-3.41483	4.44042	1.66995	0.0328819	84.8106
		rs4989308	-5.7716	2.23022	0.0096562	-10.1428	-1.40036	0.00311477	3.9357e-05	0.246507
		rs502654	2.59826	2.01778	0.197855	-1.35658	6.5531	13.4403	0.25754	701.417
		rs512453	2.58655	2.13403	0.225495	-1.59616	6.76925	13.2838	0.202674	870.657
		rs535446	3.93007	2.25761	0.0817173	-0.494852	8.355	50.9107	0.609661	4251.38
		rs5997110	-0.0560984	1.8675	0.976036	-3.71639	3.6042	0.945446	0.0243215	36.7522
		rs6001129	-0.75556	1.81259	0.676795	-4.30823	2.79711	0.469747	0.0134573	16.3973
		rs603446	2.35851	1.89096	0.212303	-1.34777	6.06479	10.5752	0.25982	430.43
		rs6077611	-1.40528	2.2508	0.532398	-5.81685	3.00628	0.245298	0.00297698	20.2121
		rs6110544	-3.76845	2.32002	0.104308	-8.31568	0.778784	0.0230878	0.000244649	2.17882
		rs6130271	-2.16256	2.31113	0.349419	-6.69236	2.36725	0.115031	0.00124035	10.668
		rs6454864	2.18396	2.30932	0.344294	-2.34231	6.71023	8.88143	0.0961054	820.763
		rs6480970	-0.463092	1.98102	0.815168	-4.34589	3.41971	0.629335	0.0129599	30.5605
		rs6534667	2.51288	2.22777	0.259327	-1.85354	6.87931	12.3405	0.156681	971.953
		rs6537156	-4.4877	2.30437	0.0514782	-9.00427	0.0288701	0.0112465	0.000122884	1.02929
		rs6685230	0.563405	2.49229	0.821155	-4.32148	5.44828	1.75664	0.0132803	232.359
		rs6730726	2.6633	2.32124	0.251234	-1.88634	7.21294	14.3435	0.151626	1356.88
		rs6759991	3.81228	1.55553	0.0142541	0.763445	6.86111	45.2533	2.14565	954.424
		rs6819555	-1.17832	2.16034	0.585456	-5.41258	3.05595	0.307796	0.0044601	21.2413
		rs682359	2.79773	2.17572	0.198483	-1.46668	7.06213	16.4073	0.23069	1166.93
		rs6901004	-1.93254	1.53253	0.207305	-4.93631	1.07123	0.14478	0.00718106	2.91896
		rs6910731	-1.26915	2.3174	0.583926	-5.81126	3.27297	0.281071	0.00299366	26.3895
		rs6935961	1.20739	1.73227	0.485803	-2.18786	4.60263	3.34474	0.112157	99.7467
		rs6947698	-1.60641	2.32493	0.489598	-6.16328	2.95046	0.200607	0.00210534	19.1147
		rs699856	-5.48038	2.32704	0.0185186	-10.0414	-0.919372	0.00416777	4.35597e-05	0.39877
		rs7006068	-1.79421	2.05436	0.382463	-5.82076	2.23233	0.166259	0.00296536	9.3216
		rs7009696	2.43831	2.30512	0.290156	-2.07972	6.95634	11.4537	0.124965	1049.79
		rs710580	1.3506	1.92182	0.482199	-2.41617	5.11737	3.85973	0.0892626	166.896
		rs7109477	-2.37781	1.96297	0.225769	-6.22523	1.46962	0.0927536	0.00197886	4.34757
		rs719564	2.14946	2.18725	0.325746	-2.13756	6.43648	8.5802	0.117942	624.203
		rs7230740	-2.61577	2.16759	0.227522	-6.86425	1.6327	0.0731113	0.00104447	5.11768
		rs7246393	-1.08469	2.14295	0.61274	-5.28487	3.11549	0.338006	0.00506767	22.5446
		rs7463805	0.0874957	1.7392	0.959877	-3.32133	3.49632	1.09144	0.0361048	32.9938
		rs7505177	-2.2853	2.17916	0.294313	-6.55645	1.98585	0.101744	0.00142092	7.28524
		rs7584842	1.24529	1.88065	0.507868	-2.44077	4.93136	3.47395	0.0870934	138.568
		rs7594598	2.12683	2.39272	0.374072	-2.56291	6.81656	8.38819	0.07708	912.84
		rs7638383	-0.329045	2.13189	0.877339	-4.50756	3.84947	0.719611	0.0110254	46.968
		rs7810390	-4.38113	2.10375	0.0372937	-8.50449	-0.257781	0.0125112	0.000202558	0.772764
		rs7843149	3.09522	2.34088	0.186086	-1.4929	7.68334	22.0921	0.22472	2171.86
		rs8006663	-4.00113	2.007	0.0461976	-7.93486	-0.0674019	0.0182949	0.000358042	0.934819
		rs8021242	4.26865	1.91517	0.0258226	0.514929	8.02238	71.4254	1.67352	3048.41
		rs8110890	1.44382	2.06043	0.483467	-2.59462	5.48225	4.23684	0.0746744	240.388
		rs875184	-2.60732	2.3036	0.257701	-7.12238	1.90775	0.0737321	0.000806842	6.7379
		rs875283	-3.70005	2.16719	0.0877661	-7.94774	0.547647	0.0247224	0.00035346	1.72918
		rs881562	1.04154	2.11634	0.622618	-3.10649	5.18957	2.83359	0.044758	179.392
		rs893922	2.9456	2.22214	0.184983	-1.4098	7.30099	19.022	0.244193	1481.76
		rs915281	0.554588	2.25931	0.806094	-3.87366	4.98283	1.74122	0.0207822	145.887
		rs928963	2.14196	2.23976	0.338903	-2.24797	6.53189	8.51611	0.105613	686.694
		rs9315440	-2.56019	1.9954	0.199476	-6.47117	1.35079	0.0772902	0.00154742	3.86048
		rs9330454	0.391398	1.46471	0.789301	-2.47944	3.26223	1.47905	0.0837904	26.1078
		rs937382	2.8602	2.04121	0.161146	-1.14057	6.86096	17.4649	0.319637	954.283
		rs938040	-3.0823	2.06946	0.136376	-7.13844	0.973843	0.0458538	0.000793991	2.6481
		rs9464137	-3.80727	2.25185	0.0908891	-8.2209	0.606365	0.0222088	0.000268972	1.83375
		rs9511152	-0.913314	1.84922	0.621384	-4.53779	2.71117	0.401192	0.010697	15.0468
		rs9517869	-0.550376	2.13498	0.79657	-4.73495	3.63419	0.576733	0.00878292	37.8713
		rs9523030	-1.20322	2.2849	0.598474	-5.68162	3.27519	0.300226	0.00340802	26.4481
		rs9541214	2.61479	2.28363	0.252203	-1.86112	7.09069	13.6643	0.155498	1200.74
		rs9543391	0.380705	2.43656	0.875838	-4.39495	5.15636	1.46332	0.0123394	173.532
		rs9610322	-1.96928	2.15387	0.360559	-6.19086	2.2523	0.139557	0.00204806	9.50957
		rs9646527	4.8556	2.37993	0.0413272	0.190947	9.52025	128.458	1.2104	13633.1
		rs9649963	0.0506678	2.31133	0.982511	-4.47955	4.58088	1.05197	0.0113385	97.6005
		rs972459	-2.41908	1.86207	0.193897	-6.06873	1.23057	0.0890035	0.0023141	3.42319
		rs9989564	-0.265543	2.18733	0.903374	-4.5527	4.02162	0.76679	0.0105387	55.7912
		All - Inverse variance weighted	0.0912291	0.180134	0.612541	-0.261834	0.444292	1.09552	0.769639	1.55939
		All - MR Egger	1.59559	0.952377	0.0958514	-0.271071	3.46225	4.93123	0.762562	31.8885
	Tyrosine	SNP	b	se	p	lo_ci	up_ci	or	or_lci95	or_uci95
		rs1000137	1.4316	1.72677	0.407067	-1.95286	4.81606	4.1854	0.141868	123.478
		rs10007704	-2.44223	2.05018	0.233565	-6.46058	1.57613	0.0869669	0.00156388	4.8362
		rs1013667	0.102744	2.1676	0.962195	-4.14575	4.35123	1.10821	0.0158316	77.5742
		rs1016522	-1.35211	1.50591	0.369257	-4.30369	1.59948	0.258695	0.0135186	4.95044
		rs10225863	6.47553	2.15988	0.0027167	2.24217	10.7089	649.06	9.41369	44751.7
		rs10495209	-1.65036	2.16227	0.445313	-5.88841	2.58769	0.191981	0.00277137	13.2991
		rs10784496	-0.847029	1.93758	0.661997	-4.64469	2.95063	0.428687	0.00961255	19.118
		rs10807322	-2.10983	2.04169	0.301427	-6.11154	1.89187	0.121258	0.00221714	6.63177
		rs10836364	-0.714386	1.79101	0.689986	-4.22476	2.79599	0.489493	0.0146288	16.3788
		rs10846667	-1.08388	1.92184	0.572769	-4.85069	2.68294	0.338281	0.00782296	14.628
		rs10881004	-1.27967	2.16848	0.55511	-5.52989	2.97056	0.27813	0.00396643	19.5028
		rs10900784	3.19507	2.05484	0.119971	-0.832424	7.22256	24.4118	0.434993	1369.99
		rs10927101	0.136572	1.91856	0.943251	-3.62381	3.89695	1.14634	0.0266809	49.2521
		rs11201034	-0.624821	2.03246	0.758523	-4.60844	3.3588	0.535357	0.00996732	28.7547
		rs11654913	-0.788497	2.24029	0.724866	-5.17946	3.60247	0.454527	0.00563104	36.6886
		rs11719675	-1.19001	2.11633	0.573912	-5.33801	2.95799	0.304218	0.00480542	19.2592
		rs11720862	-0.061422	1.892	0.974102	-3.76973	3.64689	0.940426	0.0230582	38.3552
		rs1179636	2.79327	1.92722	0.147232	-0.984076	6.57061	16.3343	0.373785	713.805
		rs11802417	-2.49049	2.11364	0.238681	-6.63323	1.65225	0.0828695	0.00131591	5.21873
		rs1220605	2.69291	2.02014	0.182521	-1.26656	6.65239	14.7747	0.281798	774.633
		rs12278762	2.07252	2.01228	0.303042	-1.87156	6.01659	7.94479	0.153883	410.178
		rs12468084	0.203678	1.97922	0.918036	-3.67559	4.08294	1.2259	0.0253346	59.3197
		rs12533939	-1.53278	2.04425	0.453376	-5.53951	2.47395	0.215935	0.00392845	11.8693
		rs1260326	-2.18575	2.15656	0.310803	-6.4126	2.0411	0.112393	0.00164075	7.69907
		rs13001325	-2.33945	2.28957	0.306882	-6.827	2.1481	0.0963806	0.0010841	8.56858
		rs13008096	1.28604	2.20432	0.559612	-3.03443	5.60652	3.61843	0.0481019	272.194
		rs13122250	-2.23974	1.43984	0.119814	-5.06182	0.582336	0.106486	0.00633402	1.79021
		rs1330918	0.894762	2.0569	0.663559	-3.13677	4.92629	2.44675	0.043423	137.867
		rs1373962	-4.8484	1.76004	0.00587453	-8.29809	-1.39871	0.00784091	0.000248993	0.246914
		rs1412972	0.326029	0.895818	0.715899	-1.42977	2.08183	1.38546	0.239363	8.01914
		rs1418942	0.533005	2.27	0.814361	-3.91619	4.9822	1.70405	0.0199168	145.795
		rs1508513	1.10491	2.317	0.633454	-3.43641	5.64623	3.01895	0.03218	283.222
		rs1519309	-0.976448	2.30616	0.671997	-5.49652	3.54362	0.376647	0.00410102	34.5921
		rs154246	-1.7117	1.8288	0.349289	-5.29614	1.87274	0.180559	0.00501088	6.50612
		rs1559063	0.539817	1.74238	0.756701	-2.87525	3.95488	1.71569	0.0564023	52.1894
		rs1663501	-0.416315	1.83213	0.820245	-4.0073	3.17467	0.659473	0.0181825	23.9189
		rs16836288	2.19263	1.3503	0.104415	-0.45395	4.83922	8.95878	0.635115	126.37
		rs1697901	2.05498	1.91859	0.284129	-1.70545	5.81541	7.80668	0.18169	335.429
		rs17698249	0.147001	2.22949	0.94743	-4.22279	4.51679	1.15835	0.0146577	91.5415
		rs17744500	-1.39141	2.11159	0.509933	-5.53013	2.7473	0.248723	0.00396549	15.6004
		rs1790398	-0.577215	1.83132	0.752617	-4.16661	3.01218	0.56146	0.0155048	20.3316
		rs1852138	6.47093	2.20668	0.00336329	2.14583	10.796	646.081	8.54911	48826.2
		rs1871053	-5.17484	1.99137	0.00935974	-9.07794	-1.27175	0.00565712	0.000114157	0.280342
		rs1995960	-0.411036	1.86635	0.825688	-4.06908	3.24701	0.662963	0.017093	25.7134
		rs1997238	1.69192	1.92357	0.37909	-2.07828	5.46213	5.42992	0.125145	235.598
		rs201262	-1.80083	1.8769	0.337323	-5.47956	1.8779	0.165162	0.00417118	6.53976
		rs207938	-3.29005	2.01736	0.102918	-7.24407	0.663975	0.0372521	0.000714399	1.9425
		rs2111118	0.384569	1.6961	0.820628	-2.93979	3.70893	1.46898	0.0528768	40.8101
		rs2126498	-1.58302	2.1123	0.453598	-5.72314	2.55709	0.205353	0.00326944	12.8982
		rs2178260	1.15426	2.07296	0.577653	-2.90875	5.21726	3.17167	0.0545441	184.429
		rs2216061	-3.7953	2.0116	0.059199	-7.73803	0.147425	0.0224761	0.00043593	1.15885
		rs2230532	3.29638	1.7671	0.0621234	-0.167144	6.7599	27.0147	0.846078	862.559
		rs2261659	0.991544	2.04393	0.627593	-3.01455	4.99764	2.69539	0.0490679	148.063
		rs2349729	0.726134	2.1648	0.737302	-3.51687	4.96914	2.06707	0.0296921	143.903
		rs2367059	-0.476452	1.89251	0.801229	-4.18578	3.23287	0.620983	0.0152104	25.3524
		rs2383131	-1.7348	2.0553	0.398636	-5.76318	2.29359	0.176436	0.00314111	9.91043
		rs2432	-1.25637	1.89069	0.506369	-4.96212	2.44938	0.284686	0.00699809	11.5812
		rs2484178	-3.97386	2.10663	0.0592461	-8.10285	0.155126	0.0188007	0.000302676	1.1678
		rs2505644	-1.39363	1.74776	0.425229	-4.81923	2.03197	0.248173	0.00807299	7.62911
		rs2520117	-1.8131	1.9158	0.343948	-5.56806	1.94187	0.163148	0.00381787	6.97175
		rs2580344	1.94753	2.0593	0.344289	-2.08869	5.98375	7.01133	0.123849	396.925
		rs2604365	-2.91082	2.01676	0.148932	-6.86367	1.04203	0.0544312	0.00104507	2.83498
		rs2658761	1.13415	1.8026	0.529235	-2.39894	4.66724	3.10852	0.0908142	106.403
		rs2662269	2.2724	2.1824	0.297764	-2.0051	6.5499	9.70266	0.134647	699.171
		rs2688858	-1.41783	2.01631	0.481943	-5.3698	2.53414	0.242238	0.00465505	12.6056
		rs2722407	1.46385	2.13158	0.492244	-2.71404	5.64174	4.32256	0.0662683	281.953
		rs2769419	-2.29761	2.18673	0.293394	-6.58359	1.98838	0.100499	0.00138287	7.30368
		rs2798184	-2.58773	1.76864	0.143434	-6.05427	0.878797	0.0751902	0.00234782	2.408
		rs2834164	-1.55959	1.91466	0.415328	-5.31233	2.19314	0.210222	0.00493042	8.96336
		rs284191	1.23298	1.49243	0.408715	-1.69218	4.15813	3.43143	0.184118	63.9521
		rs2868072	-0.215713	2.15631	0.920314	-4.44208	4.01065	0.805967	0.0117715	55.1827
		rs295142	4.26594	1.86595	0.0222428	0.608667	7.92321	71.2317	1.83798	2760.61
		rs2966079	0.475	2.08093	0.819441	-3.60362	4.55362	1.60801	0.027225	94.9756
		rs2970335	1.9642	2.12002	0.354185	-2.19103	6.11943	7.12919	0.111801	454.605
		rs2977272	4.4108	2.01622	0.0286945	0.459009	8.36259	82.3353	1.5825	4283.78
		rs3742929	3.23677	1.9708	0.100514	-0.625991	7.09954	25.4515	0.534731	1211.41
		rs3751181	-4.73271	2.10193	0.0243473	-8.85248	-0.612931	0.00880261	0.000143026	0.541761
		rs3773729	3.73685	2.42445	0.123239	-1.01507	8.48877	41.9656	0.362376	4859.89
		rs3780494	2.26673	1.45364	0.118913	-0.582398	5.11587	9.64785	0.558557	166.645
		rs38271	-0.0314559	1.73675	0.98555	-3.43548	3.37256	0.969034	0.0322101	29.1532
		rs4063769	0.725	2.01211	0.718609	-3.21873	4.66873	2.06473	0.0400057	106.563
		rs4144737	3.01535	2.26655	0.183397	-1.4271	7.4578	20.3962	0.240004	1733.33
		rs42162	-1.47191	2.16739	0.497065	-5.72	2.77618	0.229487	0.00327972	16.0576
		rs428185	0.923367	1.9155	0.629771	-2.83102	4.67776	2.51775	0.0589526	107.528
		rs4306882	1.18745	1.52234	0.435383	-1.79634	4.17124	3.27871	0.165904	64.7959
		rs430727	4.67424	2.13654	0.0286868	0.486627	8.86186	107.152	1.62682	7057.6
		rs4356783	-0.490963	2.11241	0.816213	-4.63129	3.64936	0.612036	0.00974217	38.4502
		rs4611118	-0.517495	1.96227	0.791993	-4.36354	3.32855	0.596011	0.0127333	27.8977
		rs4615256	-1.37203	1.77431	0.43936	-4.84969	2.10562	0.253591	0.00783082	8.21222
		rs4695138	-0.943542	1.65762	0.56921	-4.19248	2.3054	0.389247	0.0151088	10.0281
		rs4751282	-3.21264	1.93113	0.0961909	-6.99766	0.572373	0.04025	0.000914017	1.77247
		rs4849291	-2.23196	2.1934	0.308877	-6.53102	2.0671	0.107318	0.00145752	7.90186
		rs4870304	-1.80112	2.25394	0.424234	-6.21885	2.61661	0.165114	0.00199153	13.6892
		rs4880888	0.31695	1.87279	0.865609	-3.35373	3.98763	1.37293	0.0349539	53.9267
		rs4926571	6.6539	1.83337	0.000284165	3.06049	10.2473	775.801	21.338	28206.4
		rs4958379	0.182077	1.77871	0.918467	-3.30419	3.66835	1.19971	0.0367288	39.1871
		rs4972588	0.0123735	1.87805	0.994743	-3.6686	3.69335	1.01245	0.025512	40.1793
		rs4989308	1.5832	2.09718	0.450297	-2.52727	5.69368	4.87054	0.0798769	296.984
		rs502654	-3.08624	1.88746	0.102022	-6.78566	0.613184	0.0456734	0.00112986	1.8463
		rs512453	6.81836	1.99121	0.000616546	2.91559	10.7211	914.487	18.4597	45303.4
		rs535446	4.48056	2.11258	0.0339302	0.339913	8.62121	88.2842	1.40483	5548.09
		rs5997110	0.0168978	1.74773	0.992286	-3.40866	3.44246	1.01704	0.0330855	31.2637
		rs6001129	-3.25288	1.69274	0.0546487	-6.57066	0.0649013	0.0386628	0.00140088	1.06705
		rs603446	-0.84319	1.76841	0.633499	-4.30927	2.62289	0.430335	0.0134434	13.7755
		rs6077611	-4.62573	2.10684	0.0281223	-8.75514	-0.496322	0.00979648	0.000157649	0.608765
		rs6110544	0.208296	2.17103	0.923566	-4.04693	4.46352	1.23158	0.017476	86.7925
		rs6130271	-2.57828	2.16329	0.233327	-6.81832	1.66177	0.0759048	0.00109356	5.26862
		rs6454864	-0.215029	2.16074	0.920728	-4.45008	4.02002	0.806518	0.0116776	55.7023
		rs6480970	-0.891612	1.85303	0.630399	-4.52355	2.74032	0.409994	0.0108505	15.492
		rs6534667	0.0179488	2.08596	0.993135	-4.07053	4.10643	1.01811	0.0170683	60.7296
		rs6537156	5.62233	2.15676	0.00913816	1.39508	9.84957	276.532	4.0353	18950.2
		rs6685230	-0.956883	2.32801	0.68105	-5.51978	3.60601	0.384088	0.00400674	36.8189
		rs6730726	3.79153	2.17049	0.0806633	-0.46264	8.04569	44.3239	0.629619	3120.32
		rs6759991	0.780199	1.45361	0.591452	-2.06887	3.62927	2.18191	0.126329	37.6851
		rs6819555	-1.61537	2.02249	0.424462	-5.57946	2.34871	0.198817	0.00377461	10.4721
		rs682359	0.355702	2.03531	0.861264	-3.6335	4.34491	1.42718	0.0264234	77.085
		rs6901004	-0.385836	1.43285	0.787716	-3.19423	2.42255	0.679882	0.0409982	11.2746
		rs6910731	0.26891	2.16963	0.901361	-3.98356	4.52138	1.30854	0.0186193	91.9623
		rs6935961	-3.24007	1.6216	0.0457092	-6.41841	-0.0617319	0.0391611	0.00163125	0.940135
		rs6947698	-1.38607	2.17423	0.523799	-5.64756	2.87542	0.250055	0.0035261	17.7328
		rs699856	-2.72708	2.17799	0.21053	-6.99593	1.54178	0.0654103	0.000915605	4.67288
		rs7006068	-4.01549	1.92808	0.0372848	-7.79453	-0.236443	0.0180341	0.000411981	0.789431
		rs7009696	-0.408476	2.15747	0.849833	-4.63711	3.82016	0.664663	0.00968566	45.6114
		rs710580	-2.02062	1.79887	0.261322	-5.54641	1.50517	0.132573	0.00390146	4.5049
		rs7109477	1.31279	1.83554	0.474483	-2.28487	4.91044	3.71651	0.101787	135.7
		rs719564	2.69907	2.04565	0.187028	-1.3104	6.70853	14.8659	0.269713	819.368
		rs7230740	0.444166	2.02443	0.826337	-3.52372	4.41206	1.55919	0.0294894	82.4388
		rs7246393	-3.2187	2.00473	0.108372	-7.14797	0.710574	0.0400071	0.00078646	2.03516
		rs7463805	2.41483	1.62605	0.13752	-0.77223	5.60189	11.1879	0.461982	270.938
		rs7505177	0.222093	2.0398	0.913298	-3.77591	4.2201	1.24869	0.0229162	68.04
		rs7584842	1.20546	1.76045	0.493505	-2.24503	4.65595	3.3383	0.105925	105.209
		rs7594598	-0.96345	2.23854	0.666911	-5.35099	3.42409	0.381574	0.00474344	30.6948
		rs7638383	1.0249	1.99107	0.606728	-2.87759	4.9274	2.78682	0.0562701	138.02
		rs7810390	0.490027	1.96527	0.803095	-3.3619	4.34195	1.63236	0.0346693	76.8575
		rs7843149	1.83332	2.19402	0.403381	-2.46696	6.13361	6.25465	0.0848421	461.099
		rs8006663	-1.30864	1.87609	0.485468	-4.98577	2.36849	0.270188	0.00683453	10.6813
		rs8021242	-1.33454	1.7945	0.457068	-4.85176	2.18268	0.26328	0.00781462	8.87006
		rs8110890	-0.416347	1.92928	0.829141	-4.19774	3.36505	0.659452	0.0150294	28.935
		rs875184	-4.22046	2.15437	0.05011	-8.44303	0.00210322	0.0146918	0.000215396	1.00211
		rs875283	-2.29834	2.02964	0.25747	-6.27644	1.67975	0.100425	0.00188009	5.36421
		rs881562	-2.07991	1.98436	0.294567	-5.96925	1.80943	0.124941	0.00255615	6.10694
		rs893922	0.941126	2.07868	0.650727	-3.13308	5.01533	2.56287	0.0435834	150.706
		rs915281	2.55327	2.1152	0.227391	-1.59251	6.69905	12.849	0.203414	811.635
		rs928963	-4.31657	2.09493	0.0393519	-8.42263	-0.210516	0.0133456	0.000219836	0.810166
		rs9315440	2.27519	1.86518	0.222533	-1.38057	5.93094	9.72974	0.251436	376.509
		rs9330454	-0.364588	1.36978	0.790113	-3.04937	2.32019	0.694483	0.047389	10.1776
		rs937382	-0.177148	1.91073	0.926132	-3.92217	3.56788	0.837656	0.0197981	35.4412
		rs938040	-1.23071	1.93272	0.52427	-5.01883	2.55741	0.292085	0.00661224	12.9024
		rs9464137	-1.14408	2.1071	0.587153	-5.27399	2.98583	0.318517	0.00512314	19.8029
		rs9511152	-0.388628	1.73206	0.822467	-3.78347	3.00622	0.677986	0.0227436	20.2108
		rs9517869	-4.69087	1.9955	0.0187367	-8.60204	-0.779698	0.0091787	0.00018373	0.458544
		rs9523030	1.32842	2.13997	0.534755	-2.86592	5.52276	3.77506	0.0569305	250.324
		rs9541214	1.14777	2.13742	0.591276	-3.04157	5.3371	3.15115	0.0477598	207.91
		rs9543391	-2.55422	2.27655	0.261875	-7.01625	1.90781	0.0777529	0.000897183	6.73832
		rs9610322	-0.434881	2.01337	0.828991	-4.3811	3.51133	0.647341	0.0125116	33.4929
		rs9646527	4.33692	2.22512	0.0512868	-0.0243151	8.69817	76.472	0.975978	5991.91
		rs9649963	1.64602	2.16466	0.447011	-2.59671	5.88875	5.18629	0.0745186	360.952
		rs972459	0.615716	1.74247	0.723819	-2.79952	4.03095	1.85098	0.0608394	56.3143
		rs9989564	1.82301	2.04704	0.373166	-2.18919	5.8352	6.19045	0.112008	342.134
		All - Inverse variance weighted	-0.0717975	0.182353	0.693782	-0.42921	0.285615	0.930719	0.651023	1.33058
		All - MR Egger	0.646223	0.969091	0.505857	-1.2532	2.54564	1.90832	0.285591	12.7514
	Phenylalanine	SNP	b	se	p	lo_ci	up_ci	or	or_lci95	or_uci95
		rs10417567	-0.565325	0.403393	0.161087	-1.35598	0.225325	0.568175	0.257696	1.25273
		rs10823138	0.268892	0.303354	0.375404	-0.325682	0.863467	1.30851	0.722035	2.37137
		rs11075987	0.395212	0.413291	0.338943	-0.414839	1.20526	1.4847	0.660447	3.33764
		rs112098771	0.459253	0.487975	0.346633	-0.497178	1.41568	1.58289	0.608245	4.1193
		rs115634543	0.292558	0.573115	0.609722	-0.830747	1.41586	1.33985	0.435723	4.12004
		rs11609235	-0.14002	0.465806	0.763722	-1.053	0.77296	0.869341	0.348889	2.16617
		rs12933650	0.162546	0.481177	0.735506	-0.78056	1.10565	1.1765	0.458149	3.0212
		rs1498694	0.0542928	0.0803606	0.499285	-0.103214	0.2118	1.05579	0.901934	1.2359
		rs16921251	-0.285736	0.627533	0.64887	-1.5157	0.944229	0.751461	0.219654	2.57083
		rs17151796	0.260958	0.477399	0.584637	-0.674745	1.19666	1.29817	0.509286	3.30905
		rs17253619	0.196217	0.206774	0.342648	-0.209059	0.601493	1.21679	0.811347	1.82484
		rs17373598	0.0786329	0.454795	0.862732	-0.812765	0.970031	1.08181	0.44363	2.63803
		rs17536700	-0.108438	0.643835	0.866249	-1.37035	1.15348	0.897234	0.254017	3.1692
		rs2180314	-0.501917	0.376741	0.182774	-1.24033	0.236495	0.605369	0.289289	1.2668
		rs2978487	0.226679	0.416999	0.58672	-0.590639	1.044	1.25443	0.553973	2.84055
		rs35244631	0.530671	0.440397	0.22821	-0.332507	1.39385	1.70007	0.717124	4.03033
		rs35995393	-0.0522868	0.449029	0.907301	-0.932385	0.827811	0.949057	0.393614	2.2883
		rs4236903	-0.909313	0.406828	0.025409	-1.7067	-0.11193	0.402801	0.181464	0.894107
		rs4781730	-0.0273967	0.353006	0.938139	-0.719289	0.664496	0.972975	0.487098	1.94351
		rs487423	-0.113748	0.487863	0.815641	-1.06996	0.842464	0.892483	0.343023	2.32208
		rs641154	-0.0550853	0.467718	0.906246	-0.971813	0.861643	0.946404	0.378396	2.36705
		rs6458399	-0.420594	0.447795	0.347599	-1.29827	0.457083	0.656656	0.273003	1.57946
		rs6480462	0.288848	0.386848	0.455263	-0.469375	1.04707	1.33489	0.625393	2.84929
		rs6964674	0.0143384	0.510567	0.977596	-0.986373	1.01505	1.01444	0.372927	2.7595
		rs715	-0.829051	0.333234	0.0128503	-1.48219	-0.175912	0.436463	0.22714	0.838692
		rs72878921	0.609191	0.476153	0.200756	-0.324069	1.54245	1.83894	0.7232	4.67604
		rs73079476	-0.156787	0.360308	0.663455	-0.86299	0.549416	0.854886	0.421899	1.73224
		rs7312381	0.259292	0.42091	0.537876	-0.565691	1.08427	1.29601	0.567968	2.95729
		rs75627186	0.352275	0.584116	0.546449	-0.792593	1.49714	1.4223	0.45267	4.4689
		rs76358507	0.729871	0.510929	0.153143	-0.27155	1.73129	2.07481	0.762197	5.64795
		rs788460	-0.030378	0.556536	0.95647	-1.12119	1.06043	0.970079	0.325892	2.88762
		rs79020793	-0.752821	0.39399	0.0560351	-1.52504	0.019399	0.471036	0.217612	1.01959
		rs79286417	1.45651	0.738245	0.0485024	0.00955313	2.90347	4.29097	1.0096	18.2374
		rs7951832	0.511765	0.382704	0.181147	-0.238336	1.26186	1.66823	0.787938	3.532
		rs7969789	-0.0361026	0.168576	0.830421	-0.366512	0.294307	0.964541	0.693148	1.3422
		rs7980492	0.418172	0.369887	0.258248	-0.306805	1.14315	1.51918	0.735794	3.13663
		rs80258332	0.581845	0.411278	0.157149	-0.224259	1.38795	1.78934	0.799108	4.00662
		rs9317013	-0.0780795	0.472645	0.868789	-1.00446	0.848304	0.924891	0.366241	2.33568
		rs9467618	-0.55027	0.340058	0.105627	-1.21678	0.116244	0.576794	0.296181	1.12327
		rs9523601	0.649615	0.413826	0.116466	-0.161483	1.46071	1.9148	0.850881	4.30903
		All - Inverse variance weighted	0.0395584	0.0528703	0.454329	-0.0640673	0.143184	1.04035	0.937942	1.15394
		All - MR Egger	0.088576	0.0982433	0.372949	-0.103981	0.281133	1.09262	0.901243	1.32463
	Glutamate	SNP	b	se	p	lo_ci	up_ci	or	or_lci95	or_uci95
		rs10879778	0.19255	0.518299	0.710263	-0.823317	1.20842	1.21234	0.438973	3.34818
		rs2037458	-0.527621	0.528506	0.318122	-1.56349	0.508251	0.590007	0.209404	1.66238
		rs4149121	1.27477	0.588449	0.0302862	0.121413	2.42813	3.57789	1.12909	11.3377
		rs992534	0.737439	0.591507	0.212503	-0.421914	1.89679	2.09058	0.65579	6.66449
		All - Inverse variance weighted	0.353823	0.383202	0.355834	-0.397253	1.1049	1.4245	0.672164	3.01892
		All - MR Egger	-7.29417	3.47625	0.170761	-14.1076	-0.480718	0.000679489	7.46686e-07	0.618339
	Glycine	SNP	b	se	p	lo_ci	up_ci	or	or_lci95	or_uci95
		rs10190808	-0.156907	0.347477	0.651585	-0.837961	0.524147	0.854784	0.432592	1.68902
		rs1047891	0.0276728	0.0184177	0.132964	-0.00842581	0.0637714	1.02806	0.99161	1.06585
		rs10934753	0.116632	0.13597	0.391016	-0.149869	0.383133	1.12371	0.86082	1.46687
		rs11098665	-0.549365	0.476821	0.249262	-1.48393	0.385203	0.577316	0.226744	1.46991
		rs11130192	-0.0677527	0.400212	0.865567	-0.852167	0.716662	0.934492	0.42649	2.04759
		rs111504781	0.0438939	0.34214	0.897918	-0.6267	0.714488	1.04487	0.534352	2.04314
		rs112247225	-0.149655	0.12395	0.227288	-0.392597	0.0932881	0.861005	0.675301	1.09778
		rs11242109	-0.109882	0.428493	0.797613	-0.949729	0.729965	0.89594	0.386846	2.07501
		rs114394242	-0.399317	0.963079	0.678416	-2.28695	1.48832	0.670778	0.101576	4.42963
		rs11666281	0.0185277	0.282963	0.947794	-0.53608	0.573135	1.0187	0.585037	1.77382
		rs117249010	-1.67653	1.22846	0.172335	-4.08432	0.731255	0.187021	0.0168346	2.07769
		rs118057622	0.356718	0.684842	0.602453	-0.985572	1.69901	1.42863	0.373226	5.46852
		rs12005290	-0.544878	0.515373	0.290397	-1.55501	0.465253	0.579913	0.211188	1.59242
		rs1209623	-0.291966	0.604332	0.629009	-1.47646	0.892524	0.746794	0.228446	2.44128
		rs12307895	-0.817934	0.291525	0.00502067	-1.38932	-0.246544	0.441343	0.249244	0.781497
		rs1243473	-0.352829	0.677305	0.602415	-1.68035	0.974689	0.702697	0.186309	2.65034
		rs12566232	0.731979	0.473567	0.122184	-0.196212	1.66017	2.07919	0.821838	5.26021
		rs12573237	-0.758113	0.537968	0.158772	-1.81253	0.296305	0.46855	0.163241	1.34488
		rs12811045	0.0707061	0.528532	0.893578	-0.965216	1.10663	1.07327	0.380901	3.02414
		rs13107325	-1.49484	0.79376	0.0596683	-3.05061	0.0609318	0.224285	0.0473302	1.06283
		rs140695755	0.118527	0.625017	0.849592	-1.10651	1.34356	1.12584	0.330712	3.83267
		rs144132875	-0.0678251	0.64273	0.915958	-1.32758	1.19193	0.934424	0.265119	3.29342
		rs145678014	0.071118	0.661764	0.914418	-1.22594	1.36818	1.07371	0.293482	3.92818
		rs147504633	-0.0583997	0.486105	0.904374	-1.01117	0.894367	0.943273	0.363795	2.44579
		rs149181595	1.3873	0.662274	0.0361932	0.0892417	2.68536	4.00402	1.09334	14.6634
		rs17036342	0.0980601	0.364625	0.787981	-0.616606	0.812726	1.10303	0.539773	2.25404
		rs17114722	-0.494007	0.48956	0.312935	-1.45354	0.46553	0.610177	0.233741	1.59286
		rs17442300	-0.173245	0.433907	0.689697	-1.0237	0.677214	0.840932	0.359262	1.96839
		rs1801133	0.477194	0.466601	0.306448	-0.437344	1.39173	1.61155	0.645749	4.02181
		rs192322963	0.00540209	0.743035	0.994199	-1.45095	1.46175	1.00542	0.234348	4.3135
		rs1936789	0.291723	0.510952	0.568041	-0.709744	1.29319	1.33873	0.49177	3.64439
		rs1965869	-0.102763	0.409819	0.802006	-0.906008	0.700483	0.902341	0.404134	2.01473
		rs2009509	-0.493885	0.487822	0.311334	-1.45002	0.462247	0.610251	0.234566	1.58764
		rs2026972	0.0195164	0.124031	0.874969	-0.223585	0.262618	1.01971	0.799647	1.30033
		rs2123003	0.825935	0.47132	0.0797075	-0.097853	1.74972	2.28402	0.906782	5.75301
		rs2133899	1.98567	0.60983	0.00112952	0.790403	3.18094	7.28393	2.20429	24.0693
		rs2168101	-0.013973	0.326225	0.965835	-0.653374	0.625428	0.986124	0.520287	1.86905
		rs2246199	0.902977	0.804534	0.261709	-0.67391	2.47986	2.46694	0.509712	11.9396
		rs2608913	-0.156265	0.415087	0.706573	-0.969835	0.657306	0.855333	0.379146	1.92959
		rs2657879	-0.0182028	0.249296	0.941793	-0.506822	0.470417	0.981962	0.602407	1.60066
		rs2711697	-0.210281	0.383118	0.583097	-0.961193	0.540631	0.810356	0.382436	1.71709
		rs28435239	-0.115258	0.353456	0.744357	-0.808031	0.577515	0.891136	0.445735	1.78161
		rs28601761	-0.157355	0.15337	0.304901	-0.45796	0.143251	0.854401	0.632573	1.15402
		rs2967	0.662178	0.609262	0.277101	-0.531975	1.85633	1.93901	0.587444	6.40022
		rs2972154	-0.303431	0.414806	0.464473	-1.11645	0.509589	0.738281	0.32744	1.66461
		rs34439264	-0.515127	0.412635	0.21189	-1.32389	0.293637	0.597425	0.266098	1.3413
		rs34453616	-0.436638	0.531209	0.411094	-1.47781	0.604532	0.646205	0.228137	1.8304
		rs34505073	0.239646	0.526089	0.648733	-0.79149	1.27078	1.2708	0.453169	3.56363
		rs34536774	0.554335	0.425269	0.192407	-0.279193	1.38786	1.74078	0.756394	4.00628
		rs34656869	0.814532	0.567422	0.151146	-0.297615	1.92668	2.25812	0.742587	6.86667
		rs34945403	0.383485	0.363911	0.29198	-0.329781	1.09675	1.46739	0.719082	2.99442
		rs35484034	0.0760653	0.413471	0.854039	-0.734338	0.886469	1.07903	0.479823	2.42655
		rs35626482	0.0929571	0.616316	0.880112	-1.11502	1.30094	1.09741	0.327908	3.67274
		rs36105243	-0.0304008	0.379616	0.936171	-0.774449	0.713647	0.970057	0.460958	2.04142
		rs3736951	-0.226971	0.424019	0.592454	-1.05805	0.604107	0.796944	0.347133	1.82962
		rs3782860	0.139571	0.353463	0.69294	-0.553216	0.832358	1.14978	0.575097	2.29873
		rs3936511	0.673861	0.529018	0.202735	-0.363013	1.71074	1.9618	0.695577	5.53303
		rs4240624	0.110558	0.103591	0.285858	-0.092481	0.313597	1.1169	0.911667	1.36834
		rs4254836	0.148316	0.476785	0.755743	-0.786183	1.08282	1.15988	0.455581	2.95298
		rs4493564	0.325812	0.50986	0.522808	-0.673513	1.32514	1.38516	0.509914	3.7627
		rs45446698	0.056037	0.457183	0.902447	-0.840041	0.952115	1.05764	0.431693	2.59118
		rs489009	-0.916768	0.564104	0.104125	-2.02241	0.188875	0.399809	0.132336	1.20789
		rs4948102	0.117617	0.164645	0.474999	-0.205087	0.440322	1.12481	0.814576	1.55321
		rs499600	-1.3562	0.466821	0.00367037	-2.27117	-0.441232	0.257638	0.103191	0.643243
		rs555754	-0.07968	0.395116	0.840181	-0.854106	0.694746	0.923412	0.425663	2.0032
		rs55727466	-0.616978	0.510016	0.226385	-1.61661	0.382654	0.539573	0.198571	1.46617
		rs56113850	-0.834743	0.432656	0.0536879	-1.68275	0.0132626	0.433986	0.185863	1.01335
		rs561931	-0.343027	0.325092	0.291349	-0.980207	0.294154	0.709619	0.375233	1.34199
		rs56311083	0.238831	0.581869	0.681473	-0.901633	1.37929	1.26976	0.405906	3.9721
		rs59668107	0.409239	0.563419	0.467624	-0.695062	1.51354	1.50567	0.499044	4.54278
		rs6125987	-0.446299	0.441514	0.312094	-1.31167	0.419068	0.639992	0.269371	1.52054
		rs61789561	-0.92796	0.532902	0.0816252	-1.97245	0.116528	0.395359	0.139116	1.12359
		rs62073965	0.44192	0.232081	0.0568885	-0.012958	0.896799	1.55569	0.987126	2.45174
		rs62203720	-0.27543	0.344369	0.423819	-0.950393	0.399532	0.759245	0.386589	1.49113
		rs62357251	0.64459	0.761535	0.39731	-0.848018	2.1372	1.90521	0.428263	8.47566
		rs6449313	0.533772	0.577078	0.354989	-0.597301	1.66484	1.70535	0.550295	5.28485
		rs6601302	-1.22629	0.37752	0.00116109	-1.96623	-0.486348	0.29338	0.139984	0.614868
		rs6879874	0.254397	0.463175	0.582837	-0.653426	1.16222	1.28968	0.52026	3.19702
		rs6963105	-0.924056	0.498083	0.0635639	-1.9003	0.052186	0.396906	0.149524	1.05357
		rs7078003	0.404754	0.454067	0.372716	-0.485217	1.29472	1.49893	0.615564	3.64999
		rs7120967	-2.3851	1.07837	0.0269832	-4.49872	-0.271492	0.0920794	0.0111233	0.762241
		rs7188156	-0.0291544	0.384672	0.939586	-0.783112	0.724803	0.971266	0.456982	2.06433
		rs7252042	0.0945138	0.507797	0.852347	-0.900768	1.0898	1.09912	0.406258	2.97367
		rs72675794	-0.352226	0.528856	0.505401	-1.38878	0.684331	0.703121	0.249379	1.98245
		rs72760801	0.155635	0.565424	0.783121	-0.952595	1.26387	1.1684	0.385739	3.53908
		rs72776460	0.194174	0.386035	0.614968	-0.562456	0.950803	1.21431	0.569808	2.58779
		rs72805967	0.2669	0.463281	0.564542	-0.64113	1.17493	1.30591	0.526697	3.23792
		rs75604103	0.0707081	0.141844	0.618138	-0.207307	0.348723	1.07327	0.81277	1.41726
		rs76013262	-0.548758	0.336618	0.103057	-1.20853	0.111013	0.577667	0.298636	1.11741
		rs76796332	-1.16938	1.04235	0.261915	-3.21238	0.873615	0.310558	0.0402606	2.39556
		rs7704653	-0.502904	0.340594	0.139796	-1.17047	0.16466	0.604772	0.310222	1.17899
		rs77515689	-0.00143082	0.442953	0.997423	-0.86962	0.866758	0.99857	0.419111	2.37918
		rs7828769	-1.21888	0.561688	0.0300043	-2.31979	-0.117974	0.29556	0.098294	0.888719
		rs78303916	-1.11604	0.572335	0.0511786	-2.23782	0.00573528	0.327574	0.106691	1.00575
		rs78312207	-0.568649	0.459907	0.216294	-1.47007	0.33277	0.56629	0.22991	1.39483
		rs79325880	0.166353	0.209052	0.426179	-0.243389	0.576094	1.18099	0.783966	1.77908
		rs79687284	0.0706774	0.520406	0.89197	-0.949319	1.09067	1.07323	0.387005	2.97628
		rs8127409	0.141756	0.52709	0.787975	-0.891339	1.17485	1.1523	0.410106	3.23766
		rs9636331	0.126545	0.221098	0.567086	-0.306806	0.559896	1.1349	0.735793	1.75049
		rs9922910	0.0174348	0.108817	0.872706	-0.195846	0.230716	1.01759	0.822139	1.2595
		All - Inverse variance weighted	0.0137091	0.0182728	0.453106	-0.0221055	0.0495237	1.0138	0.978137	1.05077
		All - MR Egger	0.034737	0.0211543	0.103779	-0.00672542	0.0761994	1.03535	0.993297	1.07918
	propionic acid	SNP	b	se	p	lo_ci	up_ci	or	or_lci95	or_uci95
		rs11086551	-0.089651	0.0957655	0.349195	-0.277351	0.0980494	0.91425	0.757788	1.10302
		rs11222629	0.0670231	0.101293	0.508178	-0.131511	0.265557	1.06932	0.87677	1.30416
		rs11656534	-0.00687656	0.0910009	0.939765	-0.185238	0.171485	0.993147	0.830906	1.18707
		rs118130185	0.0976199	0.0969707	0.314081	-0.0924426	0.287682	1.10254	0.911702	1.33333
		rs12680053	0.0469168	0.123601	0.704256	-0.195342	0.289175	1.04803	0.822553	1.33533
		rs12891984	-0.115352	0.118782	0.331486	-0.348164	0.11746	0.891053	0.705983	1.12464
		rs13208940	-0.120293	0.13214	0.362639	-0.379287	0.138701	0.88666	0.684349	1.14878
		rs17595094	0.244114	0.133273	0.0669987	-0.0171012	0.50533	1.27649	0.983044	1.65753
		rs2027038	-0.120855	0.108069	0.26343	-0.33267	0.0909592	0.886162	0.717007	1.09522
		rs2281391	-0.0827673	0.107553	0.441566	-0.293571	0.128036	0.920565	0.745597	1.13659
		rs4676410	-0.0220188	0.106772	0.836617	-0.231292	0.187254	0.978222	0.793508	1.20593
		rs4756895	0.0263892	0.106441	0.804194	-0.182235	0.235013	1.02674	0.833405	1.26493
		rs4789403	0.061314	0.115072	0.594149	-0.164226	0.286854	1.06323	0.84855	1.33223
		rs563487	0.202513	0.101449	0.0459119	0.00367273	0.401354	1.22448	1.00368	1.49385
		rs6737854	-0.297805	0.112446	0.00808688	-0.518199	-0.0774103	0.742446	0.595592	0.92551
		rs7306365	-0.0843728	0.114231	0.460141	-0.308266	0.13952	0.919089	0.73472	1.14972
		rs73862615	-0.137634	0.114787	0.230514	-0.362617	0.087349	0.871417	0.695853	1.09128
		rs75561980	0.266114	0.139177	0.0558698	-0.00667354	0.538902	1.30488	0.993349	1.71412
		rs76312928	0.157519	0.115895	0.174098	-0.069635	0.384672	1.1706	0.932734	1.46913
		rs76668889	-0.0367302	0.0984171	0.708992	-0.229628	0.156167	0.963936	0.794829	1.16902
		rs76808847	-0.0923109	0.112653	0.412545	-0.313112	0.12849	0.911822	0.731168	1.13711
		rs9360322	0.128489	0.106172	0.226206	-0.0796089	0.336586	1.13711	0.923477	1.40016
		All - Inverse variance weighted	0.000323652	0.0281952	0.990841	-0.0549389	0.0555862	1.00032	0.946543	1.05716
		All - MR Egger	0.0720522	0.0743944	0.344354	-0.0737609	0.217865	1.07471	0.928894	1.24342
	Trimethylamino oxide（TMAO）	SNP	b	se	p	lo_ci	up_ci	or	or_lci95	or_uci95
		rs10433885	0.0420574	0.0340785	0.217154	-0.0247365	0.108851	1.04295	0.975567	1.115
		rs115977728	-0.078812	0.0582453	0.176022	-0.192973	0.0353488	0.924214	0.824504	1.03598
		rs12938132	-0.0981404	0.071544	0.170141	-0.238367	0.0420858	0.906522	0.787914	1.04298
		rs144875854	0.0180846	0.0623334	0.771719	-0.104089	0.140258	1.01825	0.901145	1.15057
		rs150614911	-0.0819709	0.0602565	0.173714	-0.200074	0.0361318	0.921299	0.81867	1.03679
		rs17198295	0.0667259	0.0347	0.0544878	-0.00128604	0.134738	1.069	0.998715	1.14424
		rs187795813	0.0683925	0.0699096	0.327926	-0.0686303	0.205415	1.07079	0.933672	1.22804
		rs2714372	0.0022996	0.0605051	0.969682	-0.11629	0.12089	1.0023	0.890217	1.1285
		rs2806545	0.0937638	0.0589346	0.111614	-0.0217481	0.209276	1.0983	0.978487	1.23278
		rs35575634	0.139556	0.0638829	0.0289205	0.014346	0.264767	1.14976	1.01445	1.30313
		rs4743557	0.0785797	0.0551809	0.154435	-0.0295748	0.186734	1.08175	0.970858	1.20531
		rs483366	-0.0264059	0.062962	0.674928	-0.149811	0.0969996	0.97394	0.86087	1.10186
		rs55836408	-0.0304457	0.0463802	0.511543	-0.121351	0.0604596	0.970013	0.885723	1.06232
		rs56015442	-0.0136791	0.0443636	0.757823	-0.100632	0.0732734	0.986414	0.904266	1.07602
		rs561986009	-0.00941725	0.0433935	0.828193	-0.0944684	0.0756339	0.990627	0.909856	1.07857
		rs565523	0.0705865	0.0676732	0.296925	-0.062053	0.203226	1.07314	0.939833	1.22535
		rs58349531	0.137224	0.12723	0.280788	-0.112147	0.386595	1.14708	0.893913	1.47196
		rs60919944	0.0241659	0.0512058	0.636972	-0.0761974	0.124529	1.02446	0.926633	1.13262
		rs73052331	-0.0465867	0.0788045	0.554407	-0.201043	0.10787	0.954482	0.817877	1.1139
		rs75051036	0.100252	0.0688605	0.145427	-0.0347143	0.235219	1.10545	0.965881	1.26519
		rs8056675	-0.0665851	0.0623745	0.285744	-0.188839	0.0556689	0.935583	0.82792	1.05725
		All - Inverse variance weighted	0.0182795	0.013431	0.173516	-0.00804527	0.0446043	1.01845	0.991987	1.04561
		All - MR Egger	-0.000982426	0.0263463	0.970644	-0.0526212	0.0506563	0.999018	0.948739	1.05196
	Serotonin (5HT)	SNP	b	se	p	lo_ci	up_ci	or	or_lci95	or_uci95
		rs10516056	-0.313664	0.521797	0.547759	-1.33639	0.709059	0.730765	0.262794	2.03208
		rs10881427	0.605443	0.618283	0.327465	-0.606393	1.81728	1.83206	0.545314	6.15508
		rs10953038	-0.191997	0.517159	0.710449	-1.20563	0.821635	0.825309	0.299504	2.27421
		rs11781043	0.225369	0.507754	0.657148	-0.769829	1.22057	1.25278	0.463092	3.38911
		rs12646122	0.33201	0.315103	0.29204	-0.285591	0.949611	1.39377	0.75157	2.5847
		rs17708932	0.09728	0.26383	0.712335	-0.419827	0.614387	1.10217	0.65716	1.84852
		rs2742351	-0.00605119	0.517579	0.990672	-1.02051	1.0084	0.993967	0.360413	2.74122
		rs3753556	0.294776	0.622439	0.635798	-0.925205	1.51476	1.34283	0.39645	4.54832
		rs5764174	-0.0994531	0.506728	0.844403	-1.09264	0.893734	0.905332	0.33533	2.44424
		rs6466265	-0.449327	0.578269	0.437146	-1.58273	0.684079	0.638057	0.205413	1.98195
		rs7868774	-0.0455323	0.605739	0.940081	-1.23278	1.14172	0.955489	0.291481	3.13214
		rs8113773	0.344459	0.579271	0.552083	-0.790913	1.47983	1.41123	0.453431	4.3922
		rs825278	-0.106929	0.213597	0.616646	-0.525579	0.311721	0.89859	0.591213	1.36577
		rs988694	0.465117	0.636792	0.465142	-0.782995	1.71323	1.5922	0.457035	5.54684
		rs9953702	-0.641689	0.642884	0.318211	-1.90174	0.618363	0.526403	0.149308	1.85589
		All - Inverse variance weighted	0.0296224	0.109075	0.785945	-0.184164	0.243408	1.03007	0.8318	1.27559
		All - MR Egger	0.000819612	0.195285	0.996715	-0.381938	0.383577	1.00082	0.682537	1.46752
Pain in limb	3-hydroxybutyrate(BHBA)	SNP	b	se	p	lo_ci	up_ci	or	or_lci95	or_uci95
		rs11224003	0.354277	0.277329	0.20144	-0.189289	0.897842	1.42515	0.827548	2.4543
		rs11719883	0.091283	0.215387	0.671705	-0.330876	0.513442	1.09558	0.718294	1.67103
		rs13288937	-0.0995635	0.206773	0.630153	-0.504838	0.305711	0.905232	0.603603	1.35759
		rs2295758	0.351051	0.23712	0.138746	-0.113705	0.815807	1.42056	0.892521	2.261
		rs2711506	0.060642	0.266545	0.820026	-0.461786	0.58307	1.06252	0.630157	1.79153
		rs4297577	-0.477538	0.272389	0.0795765	-1.01142	0.056344	0.620308	0.363702	1.05796
		rs4838537	-0.0541407	0.0738323	0.46338	-0.198852	0.0905706	0.947299	0.819671	1.0948
		rs6493912	-0.301658	0.284114	0.28835	-0.858521	0.255206	0.739591	0.423788	1.29073
		rs7314742	0.169566	0.289575	0.558165	-0.398001	0.737134	1.18479	0.671661	2.08994
		rs8000457	0.106397	0.0893827	0.233907	-0.0687931	0.281587	1.11226	0.93352	1.32523
		All - Inverse variance weighted	0.0150773	0.0521724	0.772589	-0.0871806	0.117335	1.01519	0.916512	1.1245
		All - MR Egger	-0.00936445	0.0755617	0.904427	-0.157465	0.138737	0.990679	0.854306	1.14882
	Tryptophan	SNP	b	se	p	lo_ci	up_ci	or	or_lci95	or_uci95
		rs1000137	0.802042	1.84227	0.663305	-2.80881	4.4129	2.23009	0.0602766	82.508
		rs10007704	-0.66747	2.1925	0.760798	-4.96478	3.62984	0.513005	0.00697949	37.7067
		rs1013667	-2.06721	2.31752	0.372396	-6.60955	2.47512	0.126538	0.00134744	11.8831
		rs1016522	1.13994	1.60995	0.478907	-2.01555	4.29544	3.12659	0.133247	73.3642
		rs10225863	0.610505	2.30942	0.791507	-3.91596	5.13697	1.84136	0.0199214	170.2
		rs10495209	-5.85093	2.31213	0.011389	-10.3827	-1.31915	0.00287724	3.09634e-05	0.267364
		rs10784496	-2.30151	2.06931	0.266047	-6.35736	1.75434	0.100107	0.00173394	5.77962
		rs10807322	2.97377	2.18467	0.17345	-1.30818	7.25571	19.5655	0.270313	1416.17
		rs10836364	-3.00396	1.91699	0.117111	-6.76126	0.753344	0.0495903	0.00115776	2.12409
		rs10846667	1.90791	2.05398	0.35295	-2.1179	5.93372	6.73898	0.120284	377.556
		rs10881004	-0.0727676	2.31835	0.97496	-4.61673	4.4712	0.929817	0.00988506	87.4613
		rs10900784	1.0581	2.19526	0.62981	-3.2446	5.36081	2.8809	0.0389841	212.896
		rs10927101	2.68417	2.04626	0.189606	-1.3265	6.69485	14.6461	0.265404	808.232
		rs11201034	1.85567	2.17482	0.393521	-2.40699	6.11832	6.39597	0.0900864	454.102
		rs11654913	-2.86275	2.39071	0.231132	-7.54854	1.82304	0.0571115	0.000526878	6.19066
		rs11719675	-2.53032	2.25881	0.262628	-6.95758	1.89695	0.0796338	0.000951397	6.6655
		rs11720862	-1.64169	2.0217	0.416772	-5.60423	2.32085	0.193652	0.00368224	10.1843
		rs1179636	1.47818	2.05911	0.472836	-2.55768	5.51404	4.38495	0.0774843	248.151
		rs11802417	-3.92105	2.25712	0.0823537	-8.34501	0.50291	0.0198203	0.00023758	1.65353
		rs1220605	3.43883	2.15864	0.111149	-0.792111	7.66976	31.1504	0.452888	2142.57
		rs12278762	1.33077	2.15151	0.536227	-2.88619	5.54773	3.78396	0.0557882	256.655
		rs12468084	-1.16027	2.1164	0.583534	-5.30843	2.98788	0.3134	0.0049497	19.8435
		rs12533939	0.0193823	2.18449	0.992921	-4.26222	4.30098	1.01957	0.014091	73.7721
		rs1260326	4.826	2.30045	0.0359187	0.317109	9.33489	124.711	1.37315	11326.4
		rs13001325	-4.06918	2.44408	0.0959306	-8.85957	0.721222	0.0170915	0.000142016	2.05694
		rs13008096	1.62746	2.35647	0.489794	-2.99121	6.24614	5.09094	0.0502265	516.015
		rs13122250	-2.84194	1.53981	0.0649447	-5.85997	0.176095	0.0583127	0.00285134	1.19255
		rs1330918	0.941569	2.19634	0.668142	-3.36325	5.24639	2.564	0.0346226	189.879
		rs1373962	0.833102	1.88471	0.658466	-2.86093	4.52714	2.30044	0.0572153	92.4934
		rs1412972	0.661889	0.959922	0.490494	-1.21956	2.54334	1.93845	0.295361	12.722
		rs1418942	0.464788	2.42915	0.848261	-4.29635	5.22593	1.59168	0.0136182	186.033
		rs1508513	3.65695	2.47695	0.139839	-1.19787	8.51178	38.7431	0.301835	4973
		rs1519309	3.16425	2.46777	0.199762	-1.67258	8.00108	23.671	0.187761	2984.19
		rs154246	0.871649	1.9534	0.655437	-2.95702	4.70031	2.39085	0.0519738	109.982
		rs1559063	-1.09607	1.86134	0.555956	-4.74429	2.55216	0.334183	0.00870122	12.8348
		rs1663501	0.774145	1.95864	0.692661	-3.06479	4.61308	2.16874	0.0466636	100.794
		rs16836288	0.578491	1.43999	0.687881	-2.24389	3.40088	1.78335	0.106045	29.9904
		rs1697901	1.48092	2.04888	0.469805	-2.53488	5.49672	4.39699	0.0792713	243.891
		rs17698249	0.987441	2.37987	0.678205	-3.67711	5.65199	2.68436	0.025296	284.859
		rs17744500	-2.71634	2.25543	0.228452	-7.13699	1.7043	0.0661162	0.000795144	5.49756
		rs1790398	4.26033	1.95815	0.0295784	0.422355	8.09831	70.8336	1.52555	3288.91
		rs1852138	2.89515	2.35882	0.219682	-1.72813	7.51843	18.0862	0.177616	1841.68
		rs1871053	-2.51161	2.12743	0.237767	-6.68137	1.65814	0.0811372	0.00125406	5.24956
		rs1995960	1.71273	1.99589	0.390822	-2.19922	5.62468	5.54407	0.11089	277.183
		rs1997238	-0.295378	2.05535	0.885728	-4.32387	3.73311	0.74425	0.0132485	41.8091
		rs201262	-0.459819	2.00423	0.818539	-4.3881	3.46846	0.631398	0.0124243	32.0874
		rs207938	-2.41514	2.15636	0.26271	-6.6416	1.81132	0.0893549	0.00130494	6.11851
		rs2111118	2.05808	1.81384	0.25652	-1.49704	5.6132	7.83091	0.223791	274.02
		rs2126498	-5.26324	2.2583	0.0197734	-9.68951	-0.83697	0.00517851	6.193e-05	0.433021
		rs2178260	-1.09388	2.21653	0.621652	-5.43829	3.25052	0.334913	0.00434692	25.8038
		rs2216061	-4.71012	2.15086	0.0285329	-8.92579	-0.494439	0.00900373	0.000132916	0.609913
		rs2230532	-0.354606	1.88738	0.850968	-4.05387	3.34465	0.70145	0.0173551	28.3508
		rs2261659	1.18494	2.18763	0.588055	-3.10281	5.4727	3.2705	0.0449227	238.102
		rs2349729	3.04412	2.31327	0.188195	-1.48989	7.57814	20.9916	0.225397	1954.98
		rs2367059	0.962535	2.0219	0.634035	-3.00039	4.92546	2.61832	0.0497677	137.753
		rs2383131	-0.10183	2.19345	0.962972	-4.40099	4.19733	0.903183	0.0122652	66.5085
		rs2432	1.8824	2.01818	0.350962	-2.07322	5.83803	6.56927	0.12578	343.102
		rs2484178	-1.43126	2.25254	0.525168	-5.84623	2.98371	0.239007	0.00289077	19.761
		rs2505644	1.46815	1.86631	0.431481	-2.18982	5.12612	4.34121	0.111937	168.363
		rs2520117	3.56889	2.04546	0.0810225	-0.440217	7.57799	35.4772	0.643897	1954.71
		rs2580344	0.0232295	2.20118	0.99158	-4.29109	4.33755	1.0235	0.01369	76.5195
		rs2604365	-2.78818	2.1548	0.195685	-7.01158	1.43522	0.061533	0.000901382	4.20056
		rs2658761	0.181598	1.92863	0.924983	-3.59852	3.96172	1.19913	0.0273641	52.5476
		rs2662269	0.99588	2.32996	0.66907	-3.57083	5.56259	2.70711	0.0281324	260.497
		rs2688858	-0.261337	2.1565	0.903544	-4.48808	3.9654	0.770021	0.0112422	52.7415
		rs2722407	-0.569985	2.27878	0.802489	-5.0364	3.89643	0.565534	0.0064971	49.2264
		rs2769419	1.76151	2.33632	0.450868	-2.81768	6.34071	5.82125	0.0597443	567.2
		rs2798184	-0.854541	1.89119	0.651375	-4.56128	2.8522	0.425479	0.0104487	17.3258
		rs2834164	-2.10715	2.0484	0.303628	-6.12201	1.9077	0.121584	0.00219404	6.73759
		rs284191	1.6923	1.5958	0.288929	-1.43546	4.82006	5.43196	0.238006	123.973
		rs2868072	-1.09574	2.30191	0.634066	-5.60748	3.41601	0.334293	0.0036703	30.4476
		rs295142	1.98299	1.99481	0.320186	-1.92684	5.89282	7.26444	0.145608	362.426
		rs2966079	1.23075	2.22211	0.579673	-3.1246	5.58609	3.42378	0.0439546	266.691
		rs2970335	1.31328	2.26331	0.561747	-3.12281	5.74937	3.71837	0.0440334	313.994
		rs2977272	3.37512	2.15702	0.11765	-0.852639	7.60288	29.2278	0.426288	2003.96
		rs3742929	1.98648	2.10475	0.345268	-2.13883	6.1118	7.28984	0.117792	451.148
		rs3751181	-1.54898	2.2479	0.490775	-5.95487	2.85692	0.212465	0.00259318	17.4078
		rs3773729	-0.0821898	2.59393	0.974723	-5.16628	5.0019	0.921097	0.00570574	148.696
		rs3780494	2.43905	1.55983	0.117897	-0.61822	5.49632	11.4621	0.538903	243.792
		rs38271	2.31633	1.85467	0.211694	-1.31882	5.95148	10.1384	0.267451	384.323
		rs4063769	-0.152509	2.15243	0.943514	-4.37128	4.06626	0.858551	0.0126351	58.3383
		rs4144737	2.73195	2.42236	0.259401	-2.01587	7.47977	15.3628	0.133205	1771.83
		rs42162	0.417465	2.31667	0.856995	-4.12321	4.95814	1.51811	0.0161924	142.329
		rs428185	-0.82738	2.04701	0.686073	-4.83952	3.18476	0.437193	0.00791087	24.1614
		rs4306882	0.244986	1.62744	0.880343	-2.9448	3.43477	1.2776	0.0526126	31.0244
		rs430727	2.37458	2.28341	0.298374	-2.10091	6.85008	10.7465	0.122345	943.952
		rs4356783	3.22815	2.259	0.152999	-1.19948	7.65578	25.2328	0.30135	2112.82
		rs4611118	-3.05816	2.09811	0.144957	-7.17045	1.05413	0.0469741	0.000768974	2.86949
		rs4615256	-0.0258349	1.89881	0.989144	-3.7475	3.69583	0.974496	0.0235766	40.279
		rs4695138	-0.751585	1.77287	0.671612	-4.22641	2.72324	0.471619	0.0146048	15.2296
		rs4751282	-0.836378	2.06424	0.68535	-4.8823	3.20954	0.433277	0.00757958	24.7677
		rs4849291	-2.78512	2.34747	0.23545	-7.38616	1.81592	0.0617216	0.000619768	6.14673
		rs4870304	-2.31673	2.40729	0.335857	-7.03502	2.40155	0.0985953	0.000880504	11.0403
		rs4880888	0.512683	1.99895	0.797583	-3.40526	4.43062	1.66976	0.0331982	83.9839
		rs4926571	1.7448	1.96111	0.373628	-2.09898	5.58858	5.72476	0.122581	267.357
		rs4958379	-3.48938	1.89871	0.066097	-7.21085	0.232088	0.0305198	0.000738531	1.26123
		rs4972588	0.512793	2.00389	0.798029	-3.41483	4.44042	1.66995	0.0328819	84.8106
		rs4989308	-5.7716	2.23022	0.0096562	-10.1428	-1.40036	0.00311477	3.9357e-05	0.246507
		rs502654	2.59826	2.01778	0.197855	-1.35658	6.5531	13.4403	0.25754	701.417
		rs512453	2.58655	2.13403	0.225495	-1.59616	6.76925	13.2838	0.202674	870.657
		rs535446	3.93007	2.25761	0.0817173	-0.494852	8.355	50.9107	0.609661	4251.38
		rs5997110	-0.0560984	1.8675	0.976036	-3.71639	3.6042	0.945446	0.0243215	36.7522
		rs6001129	-0.75556	1.81259	0.676795	-4.30823	2.79711	0.469747	0.0134573	16.3973
		rs603446	2.35851	1.89096	0.212303	-1.34777	6.06479	10.5752	0.25982	430.43
		rs6077611	-1.40528	2.2508	0.532398	-5.81685	3.00628	0.245298	0.00297698	20.2121
		rs6110544	-3.76845	2.32002	0.104308	-8.31568	0.778784	0.0230878	0.000244649	2.17882
		rs6130271	-2.16256	2.31113	0.349419	-6.69236	2.36725	0.115031	0.00124035	10.668
		rs6454864	2.18396	2.30932	0.344294	-2.34231	6.71023	8.88143	0.0961054	820.763
		rs6480970	-0.463092	1.98102	0.815168	-4.34589	3.41971	0.629335	0.0129599	30.5605
		rs6534667	2.51288	2.22777	0.259327	-1.85354	6.87931	12.3405	0.156681	971.953
		rs6537156	-4.4877	2.30437	0.0514782	-9.00427	0.0288701	0.0112465	0.000122884	1.02929
		rs6685230	0.563405	2.49229	0.821155	-4.32148	5.44828	1.75664	0.0132803	232.359
		rs6730726	2.6633	2.32124	0.251234	-1.88634	7.21294	14.3435	0.151626	1356.88
		rs6759991	3.81228	1.55553	0.0142541	0.763445	6.86111	45.2533	2.14565	954.424
		rs6819555	-1.17832	2.16034	0.585456	-5.41258	3.05595	0.307796	0.0044601	21.2413
		rs682359	2.79773	2.17572	0.198483	-1.46668	7.06213	16.4073	0.23069	1166.93
		rs6901004	-1.93254	1.53253	0.207305	-4.93631	1.07123	0.14478	0.00718106	2.91896
		rs6910731	-1.26915	2.3174	0.583926	-5.81126	3.27297	0.281071	0.00299366	26.3895
		rs6935961	1.20739	1.73227	0.485803	-2.18786	4.60263	3.34474	0.112157	99.7467
		rs6947698	-1.60641	2.32493	0.489598	-6.16328	2.95046	0.200607	0.00210534	19.1147
		rs699856	-5.48038	2.32704	0.0185186	-10.0414	-0.919372	0.00416777	4.35597e-05	0.39877
		rs7006068	-1.79421	2.05436	0.382463	-5.82076	2.23233	0.166259	0.00296536	9.3216
		rs7009696	2.43831	2.30512	0.290156	-2.07972	6.95634	11.4537	0.124965	1049.79
		rs710580	1.3506	1.92182	0.482199	-2.41617	5.11737	3.85973	0.0892626	166.896
		rs7109477	-2.37781	1.96297	0.225769	-6.22523	1.46962	0.0927536	0.00197886	4.34757
		rs719564	2.14946	2.18725	0.325746	-2.13756	6.43648	8.5802	0.117942	624.203
		rs7230740	-2.61577	2.16759	0.227522	-6.86425	1.6327	0.0731113	0.00104447	5.11768
		rs7246393	-1.08469	2.14295	0.61274	-5.28487	3.11549	0.338006	0.00506767	22.5446
		rs7463805	0.0874957	1.7392	0.959877	-3.32133	3.49632	1.09144	0.0361048	32.9938
		rs7505177	-2.2853	2.17916	0.294313	-6.55645	1.98585	0.101744	0.00142092	7.28524
		rs7584842	1.24529	1.88065	0.507868	-2.44077	4.93136	3.47395	0.0870934	138.568
		rs7594598	2.12683	2.39272	0.374072	-2.56291	6.81656	8.38819	0.07708	912.84
		rs7638383	-0.329045	2.13189	0.877339	-4.50756	3.84947	0.719611	0.0110254	46.968
		rs7810390	-4.38113	2.10375	0.0372937	-8.50449	-0.257781	0.0125112	0.000202558	0.772764
		rs7843149	3.09522	2.34088	0.186086	-1.4929	7.68334	22.0921	0.22472	2171.86
		rs8006663	-4.00113	2.007	0.0461976	-7.93486	-0.0674019	0.0182949	0.000358042	0.934819
		rs8021242	4.26865	1.91517	0.0258226	0.514929	8.02238	71.4254	1.67352	3048.41
		rs8110890	1.44382	2.06043	0.483467	-2.59462	5.48225	4.23684	0.0746744	240.388
		rs875184	-2.60732	2.3036	0.257701	-7.12238	1.90775	0.0737321	0.000806842	6.7379
		rs875283	-3.70005	2.16719	0.0877661	-7.94774	0.547647	0.0247224	0.00035346	1.72918
		rs881562	1.04154	2.11634	0.622618	-3.10649	5.18957	2.83359	0.044758	179.392
		rs893922	2.9456	2.22214	0.184983	-1.4098	7.30099	19.022	0.244193	1481.76
		rs915281	0.554588	2.25931	0.806094	-3.87366	4.98283	1.74122	0.0207822	145.887
		rs928963	2.14196	2.23976	0.338903	-2.24797	6.53189	8.51611	0.105613	686.694
		rs9315440	-2.56019	1.9954	0.199476	-6.47117	1.35079	0.0772902	0.00154742	3.86048
		rs9330454	0.391398	1.46471	0.789301	-2.47944	3.26223	1.47905	0.0837904	26.1078
		rs937382	2.8602	2.04121	0.161146	-1.14057	6.86096	17.4649	0.319637	954.283
		rs938040	-3.0823	2.06946	0.136376	-7.13844	0.973843	0.0458538	0.000793991	2.6481
		rs9464137	-3.80727	2.25185	0.0908891	-8.2209	0.606365	0.0222088	0.000268972	1.83375
		rs9511152	-0.913314	1.84922	0.621384	-4.53779	2.71117	0.401192	0.010697	15.0468
		rs9517869	-0.550376	2.13498	0.79657	-4.73495	3.63419	0.576733	0.00878292	37.8713
		rs9523030	-1.20322	2.2849	0.598474	-5.68162	3.27519	0.300226	0.00340802	26.4481
		rs9541214	2.61479	2.28363	0.252203	-1.86112	7.09069	13.6643	0.155498	1200.74
		rs9543391	0.380705	2.43656	0.875838	-4.39495	5.15636	1.46332	0.0123394	173.532
		rs9610322	-1.96928	2.15387	0.360559	-6.19086	2.2523	0.139557	0.00204806	9.50957
		rs9646527	4.8556	2.37993	0.0413272	0.190947	9.52025	128.458	1.2104	13633.1
		rs9649963	0.0506678	2.31133	0.982511	-4.47955	4.58088	1.05197	0.0113385	97.6005
		rs972459	-2.41908	1.86207	0.193897	-6.06873	1.23057	0.0890035	0.0023141	3.42319
		rs9989564	-0.265543	2.18733	0.903374	-4.5527	4.02162	0.76679	0.0105387	55.7912
		All - Inverse variance weighted	0.0912291	0.180134	0.612541	-0.261834	0.444292	1.09552	0.769639	1.55939
		All - MR Egger	1.59559	0.952377	0.0958514	-0.271071	3.46225	4.93123	0.762562	31.8885
	Tyrosine	SNP	b	se	p	lo_ci	up_ci	or	or_lci95	or_uci95
		rs10025494	-0.726357	0.431592	0.092381	-1.57228	0.119564	0.483668	0.207572	1.12701
		rs10493013	0.485991	0.576971	0.399612	-0.644873	1.61686	1.62579	0.524729	5.03722
		rs11024636	0.665344	0.426502	0.118759	-0.170599	1.50129	1.94516	0.843159	4.48746
		rs111478839	-0.137542	1.00629	0.891282	-2.10987	1.83479	0.871498	0.121253	6.26382
		rs11263465	-0.135939	0.474274	0.774398	-1.06552	0.793637	0.872895	0.34455	2.21142
		rs1126671	-0.139493	0.231053	0.546025	-0.592358	0.313372	0.869799	0.553022	1.36803
		rs112811496	-0.430505	0.284867	0.130725	-0.988844	0.127834	0.650181	0.372006	1.13636
		rs115281911	0.395493	0.494594	0.423925	-0.573911	1.3649	1.48512	0.563318	3.91532
		rs116862171	0.153738	0.333616	0.644926	-0.500149	0.807624	1.16618	0.60644	2.24257
		rs117975574	-0.454888	0.408052	0.264945	-1.25467	0.344894	0.634519	0.28517	1.41184
		rs12206654	0.00973231	0.0752805	0.897136	-0.137818	0.157282	1.00978	0.871258	1.17033
		rs12435428	0.196113	0.392209	0.617061	-0.572617	0.964842	1.21666	0.564047	2.62437
		rs1248666	0.262142	0.43249	0.544434	-0.585539	1.10982	1.29971	0.556806	3.03382
		rs12811045	-0.117387	0.46341	0.800027	-1.02567	0.790896	0.889241	0.358556	2.20537
		rs13135092	-2.688	0.842166	0.00141402	-4.33865	-1.03736	0.0680165	0.0130541	0.354389
		rs1345901	0.0518666	0.466055	0.911387	-0.861601	0.965334	1.05324	0.422485	2.62567
		rs141731602	-0.744006	0.778543	0.339255	-2.26995	0.781938	0.475206	0.103317	2.1857
		rs1426962	-0.522759	0.513434	0.3086	-1.52909	0.483571	0.592882	0.216733	1.62186
		rs143205225	-0.0702777	0.353156	0.842263	-0.762463	0.621908	0.932135	0.466516	1.86248
		rs1433210	-0.000825263	0.375307	0.998246	-0.736426	0.734776	0.999175	0.478822	2.08501
		rs1447449	-0.160612	0.464319	0.729411	-1.07068	0.749453	0.851622	0.342776	2.11584
		rs145989179	-0.677994	0.380597	0.0748477	-1.42396	0.067976	0.507634	0.240758	1.07034
		rs148165862	-0.447962	0.463475	0.33378	-1.35637	0.460449	0.638929	0.257593	1.58479
		rs1550335	-0.388951	0.396159	0.326196	-1.16542	0.38752	0.677767	0.311791	1.47332
		rs1626109	-0.773625	0.477777	0.105401	-1.71007	0.162818	0.461338	0.180853	1.17682
		rs1660613	-0.146718	0.46488	0.752304	-1.05788	0.764447	0.863538	0.34719	2.14781
		rs17050272	0.530415	0.388356	0.172003	-0.230763	1.29159	1.69964	0.793927	3.63858
		rs17232826	-0.88437	0.481868	0.0664619	-1.82883	0.0600912	0.412974	0.160601	1.06193
		rs174547	-0.628077	0.257527	0.014733	-1.13283	-0.123324	0.533617	0.32212	0.883977
		rs17690703	-0.847873	0.629729	0.178171	-2.08214	0.386396	0.428325	0.124663	1.47167
		rs17817288	0.749407	0.394155	0.0572625	-0.0231363	1.52195	2.11574	0.977129	4.58115
		rs1800961	0.674924	0.283488	0.0172756	0.119288	1.23056	1.96388	1.12669	3.42314
		rs1861179	-0.2909	0.456743	0.52419	-1.18612	0.604317	0.747591	0.305405	1.83
		rs194749	-0.183579	0.36129	0.611368	-0.891708	0.524549	0.832286	0.409955	1.6897
		rs2053701	0.32912	0.488171	0.500191	-0.627696	1.28594	1.38974	0.53382	3.61805
		rs2168101	0.0593378	0.289389	0.837537	-0.507864	0.62654	1.06113	0.60178	1.87112
		rs2230681	0.143995	0.250816	0.565895	-0.347603	0.635594	1.15488	0.706379	1.88814
		rs2424641	0.599299	0.472676	0.204839	-0.327146	1.52574	1.82084	0.720978	4.59856
		rs2434068	-0.467585	0.499575	0.349291	-1.44675	0.511582	0.626513	0.235333	1.66793
		rs2638315	-0.067119	0.165525	0.685117	-0.391549	0.257311	0.935084	0.676009	1.29345
		rs2729363	-1.07005	0.465541	0.021533	-1.98251	-0.157588	0.342992	0.137723	0.854202
		rs28601761	0.351084	0.232902	0.1317	-0.105404	0.807572	1.42061	0.899961	2.24246
		rs28733806	0.772925	0.37544	0.0395211	0.0370632	1.50879	2.16609	1.03776	4.52124
		rs330095	-0.0483175	0.434087	0.911372	-0.899127	0.802492	0.952831	0.406925	2.23109
		rs34894639	0.0487661	0.28665	0.864913	-0.513069	0.610601	1.04997	0.598656	1.84154
		rs35207259	-0.316776	0.328059	0.334241	-0.959771	0.32622	0.728494	0.38298	1.38572
		rs35614968	-0.0783425	0.169265	0.64348	-0.410102	0.253417	0.924648	0.663583	1.28842
		rs36055409	0.124302	0.391624	0.750939	-0.64328	0.891884	1.13236	0.525566	2.43972
		rs3747207	-0.176076	0.350076	0.614989	-0.862224	0.510073	0.838555	0.422222	1.66541
		rs3799350	0.630755	0.451525	0.16243	-0.254234	1.51574	1.87903	0.775511	4.55281
		rs4149056	-0.0791428	0.180153	0.660437	-0.432242	0.273956	0.923908	0.649052	1.31516
		rs4665972	0.467006	0.387186	0.227759	-0.291879	1.22589	1.59521	0.746859	3.4072
		rs55747707	0.370598	0.467591	0.428029	-0.54588	1.28708	1.4486	0.579332	3.62218
		rs56236906	-0.200171	0.570971	0.725903	-1.31927	0.918932	0.818591	0.267329	2.50661
		rs56291006	0.0368132	0.420751	0.930279	-0.787859	0.861486	1.0375	0.454817	2.36667
		rs58158339	0.457987	0.425489	0.281758	-0.375971	1.29195	1.58089	0.686622	3.63986
		rs6129629	0.393949	0.4301	0.359695	-0.449048	1.23695	1.48282	0.638235	3.44508
		rs61676179	0.0250801	0.280441	0.928739	-0.524584	0.574744	1.0254	0.591802	1.77668
		rs61926203	-0.998619	0.61305	0.103327	-2.2002	0.202959	0.368388	0.110781	1.22502
		rs62106258	1.42111	0.648891	0.0285197	0.149285	2.69294	4.14172	1.161	14.775
		rs635634	2.12251	0.417167	3.62037e-07	1.30486	2.94016	8.35207	3.68718	18.9188
		rs6575900	-0.0269184	0.310518	0.930919	-0.635533	0.581697	0.973441	0.529653	1.78907
		rs67549392	-0.00305492	0.46135	0.994717	-0.907301	0.901191	0.99695	0.403612	2.46253
		rs6868618	0.359177	0.345344	0.298314	-0.317697	1.03605	1.43215	0.727823	2.81806
		rs7005453	0.996859	0.430009	0.0204369	0.154042	1.83968	2.70976	1.16654	6.2945
		rs7019778	-0.0278212	0.34613	0.935937	-0.706236	0.650594	0.972562	0.493498	1.91668
		rs7034933	-0.737678	0.429845	0.0861344	-1.58017	0.104817	0.478223	0.205939	1.11051
		rs715	-0.761725	0.306173	0.0128503	-1.36182	-0.161626	0.46686	0.256193	0.850759
		rs7209951	0.197314	0.296729	0.506073	-0.384274	0.778902	1.21813	0.680945	2.17908
		rs73198247	0.20437	0.442389	0.644103	-0.662713	1.07145	1.22675	0.515451	2.91962
		rs740122	0.561974	0.315743	0.0751013	-0.0568828	1.18083	1.75413	0.944705	3.25708
		rs74950025	-0.125964	0.522722	0.809574	-1.1505	0.898572	0.881647	0.316479	2.45609
		rs753381	-0.643509	0.44415	0.147378	-1.51404	0.227025	0.525445	0.220019	1.25486
		rs75460349	0.102089	0.364934	0.779672	-0.613182	0.81736	1.10748	0.541625	2.26451
		rs75661418	0.572943	0.440309	0.19318	-0.290062	1.43595	1.77348	0.748217	4.20363
		rs7570775	-0.306733	0.468225	0.512405	-1.22445	0.610988	0.735847	0.293918	1.84225
		rs76089176	0.390568	0.449448	0.38485	-0.49035	1.27149	1.47782	0.612412	3.56614
		rs7624902	0.914163	0.447612	0.0411206	0.0368439	1.79148	2.49469	1.03753	5.99834
		rs7786102	-0.199251	0.355024	0.574639	-0.895098	0.496596	0.819344	0.408568	1.64312
		rs78787298	0.310945	0.427448	0.466953	-0.526853	1.14874	1.36471	0.59046	3.15423
		rs79020793	-0.397824	0.208202	0.0560351	-0.8059	0.0102513	0.67178	0.446686	1.0103
		rs79687284	-0.181633	0.63464	0.774726	-1.42553	1.06226	0.833907	0.240382	2.8929
		rs7979473	-0.0657334	0.141936	0.643278	-0.343927	0.212461	0.93638	0.70898	1.23672
		rs8081539	0.530085	0.487381	0.276762	-0.42518	1.48535	1.69908	0.653652	4.41652
		rs8100204	0.186711	0.427988	0.662653	-0.652145	1.02557	1.20528	0.520927	2.78868
		rs9311400	-0.0336034	0.4591	0.941652	-0.93344	0.866233	0.966955	0.393199	2.37794
		rs951506	-0.321567	0.498051	0.518505	-1.29775	0.654613	0.725012	0.273146	1.9244
		rs987951	0.63408	0.470995	0.178219	-0.28907	1.55723	1.88529	0.74896	4.74566
		rs9892018	-0.87386	0.49048	0.0748074	-1.8352	0.0874803	0.417338	0.159582	1.09142
		rs9940990	-0.0639198	0.181435	0.724612	-0.419532	0.291692	0.93808	0.657355	1.33869
		All - Inverse variance weighted	-0.00367699	0.0431087	0.932026	-0.0881701	0.0808161	0.99633	0.915605	1.08417
		All - MR Egger	-0.0918279	0.079884	0.253458	-0.2484	0.0647447	0.912262	0.780048	1.06689
	Phenylalanine	SNP	b	se	p	lo_ci	up_ci	or	or_lci95	or_uci95
		rs10417567	-0.565325	0.403393	0.161087	-1.35598	0.225325	0.568175	0.257696	1.25273
		rs10823138	0.268892	0.303354	0.375404	-0.325682	0.863467	1.30851	0.722035	2.37137
		rs11075987	0.395212	0.413291	0.338943	-0.414839	1.20526	1.4847	0.660447	3.33764
		rs112098771	0.459253	0.487975	0.346633	-0.497178	1.41568	1.58289	0.608245	4.1193
		rs115634543	0.292558	0.573115	0.609722	-0.830747	1.41586	1.33985	0.435723	4.12004
		rs11609235	-0.14002	0.465806	0.763722	-1.053	0.77296	0.869341	0.348889	2.16617
		rs12933650	0.162546	0.481177	0.735506	-0.78056	1.10565	1.1765	0.458149	3.0212
		rs1498694	0.0542928	0.0803606	0.499285	-0.103214	0.2118	1.05579	0.901934	1.2359
		rs16921251	-0.285736	0.627533	0.64887	-1.5157	0.944229	0.751461	0.219654	2.57083
		rs17151796	0.260958	0.477399	0.584637	-0.674745	1.19666	1.29817	0.509286	3.30905
		rs17253619	0.196217	0.206774	0.342648	-0.209059	0.601493	1.21679	0.811347	1.82484
		rs17373598	0.0786329	0.454795	0.862732	-0.812765	0.970031	1.08181	0.44363	2.63803
		rs17536700	-0.108438	0.643835	0.866249	-1.37035	1.15348	0.897234	0.254017	3.1692
		rs2180314	-0.501917	0.376741	0.182774	-1.24033	0.236495	0.605369	0.289289	1.2668
		rs2978487	0.226679	0.416999	0.58672	-0.590639	1.044	1.25443	0.553973	2.84055
		rs35244631	0.530671	0.440397	0.22821	-0.332507	1.39385	1.70007	0.717124	4.03033
		rs35995393	-0.0522868	0.449029	0.907301	-0.932385	0.827811	0.949057	0.393614	2.2883
		rs4236903	-0.909313	0.406828	0.025409	-1.7067	-0.11193	0.402801	0.181464	0.894107
		rs4781730	-0.0273967	0.353006	0.938139	-0.719289	0.664496	0.972975	0.487098	1.94351
		rs487423	-0.113748	0.487863	0.815641	-1.06996	0.842464	0.892483	0.343023	2.32208
		rs641154	-0.0550853	0.467718	0.906246	-0.971813	0.861643	0.946404	0.378396	2.36705
		rs6458399	-0.420594	0.447795	0.347599	-1.29827	0.457083	0.656656	0.273003	1.57946
		rs6480462	0.288848	0.386848	0.455263	-0.469375	1.04707	1.33489	0.625393	2.84929
		rs6964674	0.0143384	0.510567	0.977596	-0.986373	1.01505	1.01444	0.372927	2.7595
		rs715	-0.829051	0.333234	0.0128503	-1.48219	-0.175912	0.436463	0.22714	0.838692
		rs72878921	0.609191	0.476153	0.200756	-0.324069	1.54245	1.83894	0.7232	4.67604
		rs73079476	-0.156787	0.360308	0.663455	-0.86299	0.549416	0.854886	0.421899	1.73224
		rs7312381	0.259292	0.42091	0.537876	-0.565691	1.08427	1.29601	0.567968	2.95729
		rs75627186	0.352275	0.584116	0.546449	-0.792593	1.49714	1.4223	0.45267	4.4689
		rs76358507	0.729871	0.510929	0.153143	-0.27155	1.73129	2.07481	0.762197	5.64795
		rs788460	-0.030378	0.556536	0.95647	-1.12119	1.06043	0.970079	0.325892	2.88762
		rs79020793	-0.752821	0.39399	0.0560351	-1.52504	0.019399	0.471036	0.217612	1.01959
		rs79286417	1.45651	0.738245	0.0485024	0.00955313	2.90347	4.29097	1.0096	18.2374
		rs7951832	0.511765	0.382704	0.181147	-0.238336	1.26186	1.66823	0.787938	3.532
		rs7969789	-0.0361026	0.168576	0.830421	-0.366512	0.294307	0.964541	0.693148	1.3422
		rs7980492	0.418172	0.369887	0.258248	-0.306805	1.14315	1.51918	0.735794	3.13663
		rs80258332	0.581845	0.411278	0.157149	-0.224259	1.38795	1.78934	0.799108	4.00662
		rs9317013	-0.0780795	0.472645	0.868789	-1.00446	0.848304	0.924891	0.366241	2.33568
		rs9467618	-0.55027	0.340058	0.105627	-1.21678	0.116244	0.576794	0.296181	1.12327
		rs9523601	0.649615	0.413826	0.116466	-0.161483	1.46071	1.9148	0.850881	4.30903
		All - Inverse variance weighted	0.0395584	0.0528703	0.454329	-0.0640673	0.143184	1.04035	0.937942	1.15394
		All - MR Egger	0.088576	0.0982433	0.372949	-0.103981	0.281133	1.09262	0.901243	1.32463
	Glutamate	SNP	b	se	p	lo_ci	up_ci	or	or_lci95	or_uci95
		rs10879778	-0.237156	0.484894	0.624779	-1.18755	0.713237	0.788868	0.304968	2.04059
		rs2037458	0.736117	0.494206	0.136357	-0.232526	1.70476	2.08781	0.792529	5.50007
		rs4149121	0.186507	0.551087	0.735036	-0.893624	1.26664	1.20503	0.40917	3.5489
		rs992534	-0.21446	0.554268	0.698812	-1.30082	0.871904	0.806977	0.272307	2.39146
		All - Inverse variance weighted	0.128988	0.259105	0.618611	-0.378858	0.636833	1.13768	0.684643	1.89048
		All - MR Egger	2.4801	3.25363	0.525536	-3.89703	8.85722	11.9424	0.0203022	7024.93
	Glycine	SNP	b	se	p	lo_ci	up_ci	or	or_lci95	or_uci95
		rs10190808	0.121323	0.325476	0.709331	-0.51661	0.759256	1.12899	0.596539	2.13668
		rs1047891	0.0477705	0.0172294	0.00556085	0.0140008	0.0815401	1.04893	1.0141	1.08496
		rs10934753	-0.0122071	0.12729	0.9236	-0.261695	0.237281	0.987867	0.769745	1.2678
		rs11098665	0.246344	0.445543	0.580327	-0.62692	1.11961	1.27934	0.534235	3.06365
		rs11130192	-0.499489	0.374626	0.182433	-1.23376	0.234778	0.606841	0.291197	1.26463
		rs111504781	-0.166342	0.32002	0.603213	-0.793581	0.460898	0.846757	0.452222	1.5855
		rs112247225	0.00433808	0.116204	0.970221	-0.223422	0.232098	1.00435	0.799777	1.26124
		rs11242109	-0.522327	0.40187	0.19369	-1.30999	0.265338	0.593139	0.269822	1.30387
		rs114394242	-1.30621	0.891682	0.142952	-3.05391	0.441483	0.270843	0.047174	1.55501
		rs11666281	-0.037957	0.26454	0.885909	-0.556456	0.480542	0.962754	0.573237	1.61695
		rs117249010	-0.325386	1.12739	0.772874	-2.53507	1.8843	0.722249	0.079256	6.58175
		rs118057622	0.22887	0.637223	0.719469	-1.02009	1.47783	1.25718	0.360563	4.38341
		rs12005290	0.322949	0.482943	0.50368	-0.623619	1.26952	1.38119	0.536001	3.55913
		rs1209623	-0.234856	0.564431	0.677342	-1.34114	0.87143	0.790685	0.261547	2.39033
		rs12307895	-0.641138	0.27228	0.0185378	-1.17481	-0.107468	0.526693	0.308878	0.898105
		rs1243473	0.0187039	0.632954	0.976426	-1.22189	1.25929	1.01888	0.294674	3.52293
		rs12566232	-0.754559	0.443013	0.088523	-1.62287	0.113748	0.470218	0.197333	1.12047
		rs12573237	0.147322	0.503568	0.769861	-0.839671	1.13432	1.15873	0.431853	3.10905
		rs12811045	0.12533	0.494765	0.800027	-0.844409	1.09507	1.13352	0.429811	2.98939
		rs13107325	-2.7182	0.724009	0.000173771	-4.13726	-1.29915	0.0659932	0.0159665	0.272765
		rs140695755	0.31097	0.59027	0.598314	-0.84596	1.4679	1.36475	0.429145	4.34011
		rs144132875	0.200098	0.600017	0.738766	-0.975935	1.37613	1.22152	0.37684	3.95956
		rs145678014	0.0457495	0.616029	0.940799	-1.16167	1.25317	1.04681	0.312964	3.50141
		rs147504633	0.016029	0.456072	0.971964	-0.877873	0.90993	1.01616	0.415666	2.48415
		rs149181595	0.623479	0.61802	0.313055	-0.587841	1.8348	1.86541	0.555525	6.26387
		rs17036342	-0.371534	0.342209	0.277614	-1.04226	0.299195	0.689675	0.352656	1.34877
		rs17114722	0.0405749	0.455178	0.92897	-0.851574	0.932724	1.04141	0.426743	2.54142
		rs17442300	-0.14561	0.405702	0.719665	-0.940786	0.649567	0.864495	0.390321	1.91471
		rs1801133	-0.210146	0.436808	0.63045	-1.06629	0.645999	0.810466	0.344283	1.90789
		rs192322963	0.784482	0.689974	0.255549	-0.567866	2.13683	2.19127	0.566733	8.47254
		rs1936789	-0.185205	0.478292	0.698592	-1.12266	0.752247	0.830934	0.325414	2.12176
		rs1965869	-0.164235	0.384193	0.66903	-0.917254	0.588784	0.848543	0.399615	1.8018
		rs2009509	-0.476901	0.456617	0.29629	-1.37187	0.418068	0.620704	0.253632	1.51902
		rs2026972	0.205891	0.115887	0.0756247	-0.021247	0.433029	1.22862	0.978977	1.54192
		rs2123003	1.04363	0.441753	0.0181534	0.177794	1.90947	2.83951	1.19458	6.74949
		rs2133899	0.0027071	0.57178	0.996222	-1.11798	1.1234	1.00271	0.326939	3.07528
		rs2168101	0.0626175	0.305384	0.837537	-0.535935	0.66117	1.06462	0.585122	1.93706
		rs2246199	1.23741	0.752439	0.100065	-0.237367	2.71219	3.44669	0.788702	15.0623
		rs2608913	-0.714537	0.388448	0.0658467	-1.4759	0.0468212	0.489418	0.228574	1.04793
		rs2657879	-0.0941065	0.233052	0.686359	-0.550888	0.362675	0.910186	0.576438	1.43717
		rs2711697	-0.159063	0.358306	0.657092	-0.861342	0.543216	0.852943	0.422595	1.72153
		rs28435239	0.255148	0.330936	0.440713	-0.393486	0.903782	1.29065	0.674701	2.46892
		rs28601761	-0.216251	0.143457	0.1317	-0.497426	0.064924	0.805533	0.608094	1.06708
		rs2967	-0.282014	0.569738	0.620608	-1.3987	0.834674	0.754263	0.246917	2.30406
		rs2972154	-0.110471	0.387539	0.7756	-0.870047	0.649105	0.895413	0.418932	1.91383
		rs34439264	0.143088	0.385696	0.710647	-0.612876	0.899052	1.15383	0.541791	2.45727
		rs34453616	0.119986	0.496676	0.809107	-0.853499	1.09347	1.12748	0.425922	2.98462
		rs34505073	-0.474578	0.490227	0.333005	-1.43542	0.486266	0.622147	0.238015	1.62623
		rs34536774	0.51856	0.397801	0.192382	-0.26113	1.29825	1.67961	0.770181	3.66288
		rs34656869	-0.145178	0.531259	0.784645	-1.18645	0.896091	0.864868	0.305304	2.45001
		rs34945403	0.194629	0.339672	0.56665	-0.471127	0.860385	1.21486	0.624298	2.36407
		rs35484034	-0.323039	0.387684	0.404702	-1.0829	0.436821	0.723946	0.338612	1.54778
		rs35626482	0.542848	0.57572	0.34573	-0.585563	1.67126	1.7209	0.556792	5.31886
		rs36105243	0.265987	0.355047	0.45376	-0.429905	0.96188	1.30472	0.650571	2.61661
		rs3736951	-0.248777	0.396045	0.529904	-1.02502	0.527472	0.779754	0.358788	1.69464
		rs3782860	-0.172622	0.330706	0.601685	-0.820806	0.475563	0.841456	0.440077	1.60892
		rs3936511	-0.355718	0.496516	0.473727	-1.32889	0.617453	0.70067	0.264771	1.8542
		rs4240624	0.104487	0.0969116	0.28096	-0.0854599	0.294433	1.11014	0.91809	1.34237
		rs4254836	-0.36869	0.44508	0.407461	-1.24105	0.503666	0.691639	0.289081	1.65478
		rs4493564	0.936768	0.477298	0.0496871	0.00126384	1.87227	2.55172	1.00126	6.50306
		rs45446698	0.0419976	0.428004	0.921833	-0.796889	0.880885	1.04289	0.450729	2.41303
		rs489009	-0.331789	0.527779	0.529577	-1.36624	0.702657	0.717639	0.255065	2.01911
		rs4948102	-0.0498459	0.153494	0.745377	-0.350695	0.251003	0.951376	0.704199	1.28531
		rs499600	-0.270732	0.43484	0.533546	-1.12302	0.581554	0.762821	0.325297	1.78882
		rs555754	0.0454038	0.370235	0.902396	-0.680257	0.771065	1.04645	0.506487	2.16207
		rs55727466	-0.763687	0.477454	0.10971	-1.6995	0.172123	0.465945	0.182775	1.18782
		rs56113850	0.121917	0.404406	0.763055	-0.670718	0.914552	1.12966	0.511341	2.49566
		rs561931	0.0181712	0.304601	0.95243	-0.578846	0.615189	1.01834	0.560545	1.85001
		rs56311083	0.734793	0.544297	0.177021	-0.332029	1.80162	2.08505	0.717467	6.05943
		rs59668107	-0.291158	0.524213	0.578608	-1.31861	0.736299	0.747398	0.267506	2.08819
		rs6125987	-0.0898783	0.413155	0.827787	-0.899663	0.719906	0.914042	0.406707	2.05424
		rs61789561	0.0818304	0.497262	0.869289	-0.892802	1.05646	1.08527	0.409507	2.87618
		rs62073965	0.235961	0.21731	0.277555	-0.189966	0.661888	1.26612	0.826987	1.93845
		rs62203720	-0.346149	0.324157	0.28559	-0.981496	0.289198	0.707407	0.37475	1.33536
		rs62357251	0.548228	0.71346	0.442245	-0.850154	1.94661	1.73018	0.427349	7.0049
		rs6449313	-0.699468	0.539594	0.194876	-1.75707	0.358135	0.496849	0.172549	1.43066
		rs6601302	-0.457341	0.355063	0.197727	-1.15326	0.238583	0.632965	0.315605	1.26945
		rs6879874	-0.10901	0.433371	0.801397	-0.958418	0.740398	0.896721	0.383499	2.09677
		rs6963105	-0.553542	0.465999	0.234888	-1.4669	0.359816	0.57491	0.230639	1.43307
		rs7078003	-0.228184	0.425411	0.591692	-1.06199	0.605621	0.795978	0.345768	1.83239
		rs7120967	1.59137	1.02016	0.118778	-0.40814	3.59089	4.91049	0.664885	36.2662
		rs7188156	0.200896	0.360775	0.577633	-0.506223	0.908015	1.2225	0.602768	2.4794
		rs7252042	-0.429084	0.474297	0.365638	-1.35871	0.500537	0.651105	0.256993	1.64961
		rs72675794	0.377471	0.495226	0.445929	-0.593173	1.34811	1.45859	0.552571	3.85016
		rs72760801	-0.116593	0.529434	0.825698	-1.15428	0.921097	0.889947	0.315283	2.51205
		rs72776460	-0.141017	0.361567	0.696525	-0.849689	0.567655	0.868475	0.427548	1.76413
		rs72805967	1.15994	0.437078	0.00795785	0.303268	2.01662	3.18975	1.35428	7.51285
		rs75604103	0.16829	0.132931	0.205515	-0.0922548	0.428835	1.18328	0.911873	1.53547
		rs76013262	0.072395	0.316292	0.818957	-0.547537	0.692327	1.07508	0.578373	1.99836
		rs76796332	0.00146285	0.983423	0.998813	-1.92605	1.92897	1.00146	0.145723	6.88243
		rs7704653	-0.648662	0.318171	0.0414776	-1.27228	-0.0250477	0.522745	0.280193	0.975263
		rs77515689	0.196116	0.414909	0.636446	-0.617105	1.00934	1.21667	0.539504	2.74379
		rs7828769	-0.0267707	0.525794	0.959393	-1.05733	1.00379	0.973584	0.347383	2.72859
		rs78303916	-0.228123	0.537718	0.671389	-1.28205	0.825804	0.796027	0.277468	2.28372
		rs78312207	0.159984	0.42829	0.708746	-0.679464	0.999432	1.17349	0.506889	2.71674
		rs79325880	-0.00265717	0.196168	0.989193	-0.387146	0.381832	0.997346	0.678992	1.46497
		rs79687284	-0.140357	0.490417	0.774726	-1.10157	0.820861	0.869048	0.332347	2.27246
		rs8127409	0.593861	0.493495	0.228829	-0.373388	1.56111	1.81097	0.688398	4.76411
		rs9636331	0.107864	0.206724	0.601825	-0.297314	0.513042	1.1139	0.74281	1.67037
		rs9922910	-0.0540419	0.10195	0.596054	-0.253863	0.145779	0.947392	0.775798	1.15694
		All - Inverse variance weighted	0.0337023	0.01519	0.0265063	0.00392985	0.0634747	1.03428	1.00394	1.06553
		All - MR Egger	0.0535799	0.0175138	0.00286147	0.0192528	0.0879071	1.05504	1.01944	1.09189
	propionic acid	SNP	b	se	p	lo_ci	up_ci	or	or_lci95	or_uci95
		rs11086551	-0.0216717	0.0897103	0.80911	-0.197504	0.15416	0.978561	0.820777	1.16668
		rs11222629	0.0884739	0.094698	0.350162	-0.0971341	0.274082	1.09251	0.907434	1.31532
		rs11656534	0.0104813	0.08514	0.902023	-0.156393	0.177356	1.01054	0.855223	1.19406
		rs118130185	-0.100076	0.0903855	0.268201	-0.277232	0.0770793	0.904768	0.757879	1.08013
		rs12680053	0.0561118	0.115136	0.626009	-0.169555	0.281779	1.05772	0.84404	1.32549
		rs12891984	0.235049	0.110652	0.0336526	0.0181702	0.451928	1.26497	1.01834	1.57134
		rs13208940	0.0738782	0.121662	0.543692	-0.16458	0.312336	1.07668	0.84825	1.36661
		rs17595094	0.16149	0.123748	0.191896	-0.0810564	0.404037	1.17526	0.922142	1.49786
		rs2027038	-0.145753	0.10101	0.149031	-0.343732	0.0522257	0.864371	0.709119	1.05361
		rs2281391	0.0318667	0.100637	0.751509	-0.165382	0.229115	1.03238	0.84757	1.25749
		rs4676410	-0.201851	0.0998894	0.0433057	-0.397635	-0.00606824	0.817216	0.671907	0.99395
		rs4756895	0.0214117	0.0996632	0.829892	-0.173928	0.216751	1.02164	0.840357	1.24204
		rs4789403	-0.0670076	0.107683	0.533765	-0.278066	0.14405	0.935188	0.757247	1.15494
		rs563487	0.188446	0.0948609	0.0469725	0.00251838	0.374373	1.20737	1.00252	1.45408
		rs6737854	-0.178122	0.10501	0.0898403	-0.383941	0.0276973	0.836841	0.681172	1.02808
		rs7306365	0.0396424	0.106842	0.710608	-0.169767	0.249052	1.04044	0.843861	1.28281
		rs73862615	-0.00270658	0.10779	0.979967	-0.213974	0.208561	0.997297	0.807369	1.2319
		rs75561980	0.0695884	0.128422	0.587906	-0.182119	0.321296	1.07207	0.833502	1.37891
		rs76312928	-0.00203083	0.108802	0.985108	-0.215283	0.211221	0.997971	0.806313	1.23519
		rs76668889	0.0771324	0.0917149	0.400347	-0.102629	0.256893	1.08019	0.902462	1.29291
		rs76808847	-0.107259	0.105254	0.308181	-0.313557	0.0990393	0.898293	0.730842	1.10411
		rs9360322	-0.113452	0.099447	0.253942	-0.308368	0.0814643	0.892747	0.734645	1.08487
		All - Inverse variance weighted	0.000207709	0.0242743	0.993173	-0.04737	0.0477854	1.00021	0.953734	1.04895
		All - MR Egger	0.0465995	0.0646537	0.4794	-0.0801217	0.173321	1.0477	0.923004	1.18925
	Trimethylamino oxide（TMAO）	SNP	b	se	p	lo_ci	up_ci	or	or_lci95	or_uci95
		rs13236413	-0.019913	0.0322407	0.536817	-0.0831048	0.0432789	0.980284	0.920255	1.04423
		rs17418675	-0.0262404	0.0577146	0.649355	-0.139361	0.0868802	0.974101	0.869914	1.09077
		rs3935570	-0.0282044	0.0429741	0.511623	-0.112434	0.0560249	0.97219	0.893657	1.05762
		rs4846884	0.0454712	0.0688795	0.509154	-0.0895326	0.180475	1.04652	0.914358	1.19779
		rs7302178	0.000330044	0.0635104	0.995854	-0.12415	0.12481	1.00033	0.883247	1.13293
		All - Inverse variance weighted	-0.0144274	0.0210239	0.492563	-0.0556342	0.0267794	0.985676	0.945885	1.02714
		All - MR Egger	-0.0219874	0.0639449	0.753648	-0.147319	0.103345	0.978253	0.863018	1.10887
	Serotonin (5HT)	SNP	b	se	p	lo_ci	up_ci	or	or_lci95	or_uci95
		rs10516056	1.06664	0.489072	0.0291881	0.108054	2.02522	2.90559	1.11411	7.57775
		rs10881427	0.310981	0.578692	0.591001	-0.823256	1.44522	1.36476	0.439	4.24277
		rs10953038	0.175955	0.484168	0.716293	-0.773015	1.12492	1.19238	0.461619	3.07998
		rs11781043	1.17293	0.47489	0.0135156	0.24214	2.10371	3.23143	1.27397	8.19652
		rs12646122	0.176775	0.295352	0.549491	-0.402115	0.755665	1.19336	0.668904	2.12903
		rs17708932	0.200538	0.24652	0.415945	-0.282641	0.683716	1.22206	0.753791	1.98123
		rs2742351	0.101793	0.482766	0.833001	-0.844428	1.04801	1.10715	0.429803	2.85198
		rs3753556	0.567013	0.582721	0.330532	-0.57512	1.70915	1.76299	0.562637	5.52425
		rs5764174	-0.41136	0.473862	0.38534	-1.34013	0.51741	0.662748	0.261812	1.67768
		rs6466265	0.233668	0.541398	0.666031	-0.827472	1.29481	1.26323	0.437153	3.6503
		rs7868774	0.254957	0.566633	0.652746	-0.855644	1.36556	1.29041	0.42501	3.91791
		rs8113773	1.1644	0.542072	0.0317094	0.101939	2.22686	3.204	1.10732	9.27072
		rs825278	0.0970048	0.199645	0.627048	-0.2943	0.488309	1.10187	0.745053	1.62956
		rs988694	0.66783	0.596067	0.262546	-0.500461	1.83612	1.95	0.606251	6.27216
		rs9953702	-0.758753	0.601936	0.207481	-1.93855	0.42104	0.46825	0.143913	1.52355
		All - Inverse variance weighted	0.257254	0.108277	0.0175069	0.0450307	0.469477	1.29337	1.04606	1.59916
		All - MR Egger	0.0830247	0.192479	0.673285	-0.294235	0.460284	1.08657	0.745102	1.58452
Low back pain	3-hydroxybutyrate(BHBA)	SNP	b	se	p	lo_ci	up_ci	or	or_lci95	or_uci95
		rs11224003	-0.207747	0.281606	0.460683	-0.759696	0.344201	0.812412	0.467809	1.41086
		rs11719883	0.315496	0.218489	0.148741	-0.112741	0.743734	1.37094	0.893382	2.10378
		rs13288937	0.22305	0.21275	0.294448	-0.193941	0.640041	1.24988	0.823707	1.89656
		rs2295758	-0.106409	0.240367	0.657987	-0.577528	0.36471	0.899057	0.561284	1.4401
		rs2711506	0.149889	0.271314	0.580636	-0.381887	0.681666	1.16171	0.682572	1.97717
		rs4297577	-0.417004	0.27653	0.131558	-0.959003	0.124995	0.659018	0.383275	1.13314
		rs4838537	-0.112945	0.0755648	0.134999	-0.261052	0.0351622	0.8932	0.770241	1.03579
		rs6493912	-0.141155	0.289291	0.625595	-0.708165	0.425854	0.868354	0.492547	1.5309
		rs7314742	0.0407939	0.294128	0.889692	-0.535698	0.617286	1.04164	0.585261	1.85389
		rs8000457	0.142603	0.0909408	0.11686	-0.0356404	0.320847	1.15327	0.964987	1.3783
		All - Inverse variance weighted	-0.000223594	0.055101	0.996762	-0.108222	0.107774	0.999776	0.897429	1.1138
		All - MR Egger	-0.0179865	0.0804587	0.828711	-0.175686	0.139713	0.982174	0.838882	1.14994
	Tryptophan	SNP	b	se	p	lo_ci	up_ci	or	or_lci95	or_uci95
		rs1000137	1.74879	1.75519	0.319079	-1.69138	5.18895	5.74762	0.184265	179.281
		rs10007704	-0.68352	2.0847	0.743006	-4.76953	3.40249	0.504837	0.00848435	30.0389
		rs1013667	-2.10406	2.20404	0.33976	-6.42398	2.21585	0.12196	0.00162219	9.16923
		rs1016522	0.109295	1.53312	0.943167	-2.89561	3.11421	1.11549	0.0552651	22.5155
		rs10225863	1.42187	2.19797	0.517695	-2.88615	5.72989	4.14487	0.0557907	307.937
		rs10495209	-3.95645	2.19939	0.0720375	-8.26726	0.354364	0.0191309	0.000256787	1.42527
		rs10784496	-5.03191	1.97059	0.0106644	-8.89427	-1.16956	0.00652633	0.000137173	0.310504
		rs10807322	-0.537809	2.07922	0.795898	-4.61307	3.53745	0.584026	0.00992128	34.3793
		rs10836364	-2.07972	1.82353	0.254082	-5.65384	1.4944	0.124965	0.00350403	4.45667
		rs10846667	2.896	1.95568	0.138655	-0.937128	6.72913	18.1016	0.391751	836.418
		rs10881004	-1.50767	2.20825	0.494769	-5.83585	2.82051	0.221425	0.00292095	16.7853
		rs10900784	0.212032	2.09031	0.919205	-3.88498	4.30904	1.23619	0.0205483	74.3692
		rs10927101	-1.2984	1.94816	0.505107	-5.11679	2.51999	0.272968	0.00599526	12.4284
		rs11201034	-0.0697844	2.06883	0.973091	-4.1247	3.98513	0.932595	0.0161684	53.7921
		rs11654913	-2.08851	2.27895	0.359439	-6.55525	2.37823	0.123872	0.00142262	10.7858
		rs11719675	-4.97422	2.1519	0.0208025	-9.19194	-0.7565	0.00691391	0.000101857	0.469306
		rs11720862	-0.875439	1.92207	0.648774	-4.6427	2.89183	0.416679	0.00963162	18.0262
		rs1179636	6.2158	1.96147	0.00152988	2.37133	10.0603	500.596	10.7116	23394.9
		rs11802417	-0.0682217	2.14714	0.974653	-4.27662	4.14018	0.934053	0.0138895	62.8141
		rs1220605	0.947672	2.05587	0.644828	-3.08184	4.97718	2.5797	0.0458749	145.065
		rs12278762	3.82937	2.04865	0.0615927	-0.185984	7.84473	46.0336	0.830287	2552.24
		rs12468084	-1.01642	2.0144	0.613853	-4.96464	2.93179	0.361886	0.00698046	18.7612
		rs12533939	1.79563	2.07922	0.387804	-2.27965	5.87091	6.02329	0.10232	354.573
		rs1260326	7.12048	2.18575	0.00112324	2.83642	11.4045	1237.04	17.0545	89727.9
		rs13001325	-1.68118	2.33014	0.470607	-6.24826	2.8859	0.186154	0.00193381	17.9198
		rs13008096	4.01167	2.24281	0.0736668	-0.384245	8.40758	55.2389	0.680965	4480.89
		rs13122250	-0.999073	1.46432	0.495064	-3.86914	1.871	0.368221	0.0208763	6.49477
		rs1330918	3.14167	2.09206	0.133172	-0.958775	7.24211	23.1424	0.383362	1397.04
		rs1373962	-1.87065	1.79263	0.296705	-5.3842	1.6429	0.154023	0.0045885	5.17014
		rs1412972	0.247897	0.91114	0.785566	-1.53794	2.03373	1.28133	0.214824	7.64255
		rs1418942	-2.22244	2.31107	0.336224	-6.75213	2.30725	0.108344	0.00116838	10.0468
		rs1508513	-0.3387	2.35669	0.885723	-4.95781	4.28041	0.712696	0.00702828	72.2703
		rs1519309	0.862384	2.35023	0.713666	-3.74406	5.46883	2.3688	0.0236578	237.182
		rs154246	-1.65819	1.86171	0.3731	-5.30713	1.99076	0.190484	0.00495612	7.32107
		rs1559063	1.10456	1.77375	0.533465	-2.37199	4.5811	3.01788	0.0932952	97.6215
		rs1663501	-1.60466	1.86308	0.389078	-5.2563	2.04699	0.200958	0.00521456	7.74452
		rs16836288	0.0547213	1.37171	0.968179	-2.63383	2.74327	1.05625	0.0718029	15.5378
		rs1697901	1.19359	1.95256	0.541003	-2.63342	5.0206	3.2989	0.0718325	151.502
		rs17698249	-4.45627	2.26961	0.049594	-8.90471	-0.00782839	0.0116056	0.000135748	0.992202
		rs17744500	0.494963	2.14938	0.817872	-3.71781	4.70774	1.64044	0.024287	110.801
		rs1790398	3.91771	1.86289	0.0354636	0.266441	7.56898	50.2851	1.30531	1937.16
		rs1852138	2.45395	2.24419	0.274189	-1.94466	6.85255	11.6342	0.143035	946.293
		rs1871053	-5.50259	2.02449	0.00656748	-9.47059	-1.53459	0.0040762	7.7086e-05	0.215543
		rs1995960	0.0668298	1.89766	0.971907	-3.65259	3.78625	1.06911	0.025924	44.0906
		rs1997238	-4.79244	1.95514	0.0142382	-8.62453	-0.960361	0.00829216	0.000179645	0.382755
		rs201262	-0.698147	1.90845	0.7145	-4.43871	3.04241	0.497506	0.0118112	20.9558
		rs207938	-4.82981	2.05231	0.0186051	-8.85235	-0.807279	0.00798801	0.000143045	0.44607
		rs2111118	2.34788	1.72429	0.173307	-1.03172	5.72749	10.4634	0.356393	307.196
		rs2126498	-1.18919	2.14865	0.579949	-5.40056	3.02217	0.304467	0.00451407	20.5358
		rs2178260	2.09908	2.10958	0.319726	-2.0357	6.23386	8.15865	0.130588	509.72
		rs2216061	-4.98181	2.04585	0.0148882	-8.99167	-0.971955	0.0068616	0.000124442	0.378343
		rs2230532	1.68231	1.79599	0.348911	-1.83783	5.20245	5.37796	0.159162	181.717
		rs2261659	3.54233	2.08199	0.0888648	-0.538367	7.62302	34.5472	0.583701	2044.72
		rs2349729	1.01218	2.20568	0.646309	-3.31095	5.3353	2.75158	0.0364814	207.536
		rs2367059	-2.58954	1.92426	0.178388	-6.36109	1.182	0.0750543	0.00172748	3.2609
		rs2383131	-0.81246	2.09034	0.697517	-4.90953	3.28461	0.443765	0.00737598	26.6984
		rs2432	-0.247637	1.92078	0.897417	-4.01237	3.51709	0.780643	0.0180905	33.6863
		rs2484178	-7.18633	2.13891	0.000779986	-11.3786	-2.99405	0.000756865	1.14377e-05	0.050084
		rs2505644	1.74345	1.77627	0.326333	-1.73803	5.22493	5.71704	0.175867	185.849
		rs2520117	-0.211719	1.94774	0.91344	-4.02928	3.60584	0.809192	0.0177871	36.8127
		rs2580344	0.0595295	2.09459	0.977327	-4.04586	4.16492	1.06134	0.0174947	64.3875
		rs2604365	-5.411	2.04383	0.00810953	-9.41691	-1.40509	0.00446717	8.13366e-05	0.245346
		rs2658761	2.04027	1.83388	0.265905	-1.55414	5.63468	7.69268	0.211371	279.968
		rs2662269	0.829111	2.22136	0.708966	-3.52475	5.18297	2.29128	0.0294593	178.211
		rs2688858	-2.63556	2.0532	0.199271	-6.65984	1.38872	0.071679	0.00128135	4.00973
		rs2722407	1.9395	2.17107	0.371675	-2.31579	6.19479	6.95527	0.0986883	490.188
		rs2769419	-1.45667	2.22512	0.512695	-5.81792	2.90457	0.233011	0.0029738	18.2575
		rs2798184	-0.489735	1.79829	0.785365	-4.01438	3.03491	0.612789	0.0180542	20.7991
		rs2834164	-0.340564	1.94994	0.861352	-4.16245	3.48132	0.711369	0.0155694	32.5025
		rs284191	-2.23358	1.51835	0.141276	-5.20956	0.742392	0.107144	0.00546408	2.10096
		rs2868072	0.407297	2.1921	0.8526	-3.88922	4.70381	1.50275	0.0204613	110.367
		rs295142	-0.474013	1.89959	0.802948	-4.19722	3.24919	0.622499	0.0150374	25.7695
		rs2966079	3.33195	2.11917	0.115882	-0.821614	7.48552	27.9929	0.439721	1782.05
		rs2970335	-2.40907	2.15517	0.263649	-6.63321	1.81507	0.089899	0.00131594	6.14151
		rs2977272	3.25858	2.05184	0.112258	-0.763026	7.28019	26.0126	0.466253	1451.26
		rs3742929	2.3885	2.00425	0.233373	-1.53983	6.31683	10.8971	0.214417	553.817
		rs3751181	-3.00763	2.14009	0.159908	-7.2022	1.18693	0.0494084	0.000744944	3.27702
		rs3773729	3.98062	2.47058	0.107134	-0.861712	8.82296	53.5505	0.422438	6788.34
		rs3780494	-0.860939	1.4773	0.560041	-3.75644	2.03456	0.422765	0.0233668	7.64889
		rs38271	0.219363	1.76682	0.901191	-3.2436	3.68233	1.24528	0.0390232	39.7387
		rs4063769	-0.574649	2.04784	0.779008	-4.58842	3.43912	0.562903	0.0101689	31.1596
		rs4144737	-0.4115	2.304	0.85825	-4.92734	4.10434	0.662656	0.00724572	60.603
		rs42162	3.76653	2.20453	0.0875371	-0.554364	8.08741	43.2296	0.574438	3253.26
		rs428185	-0.0272707	1.94884	0.988835	-3.84699	3.79245	0.973098	0.0213438	44.365
		rs4306882	0.939767	1.54986	0.54428	-2.09797	3.9775	2.55938	0.122705	53.3835
		rs430727	0.692946	2.17554	0.750093	-3.57112	4.95701	1.9996	0.0281243	142.168
		rs4356783	1.3015	2.15046	0.545032	-2.9134	5.5164	3.67481	0.054291	248.738
		rs4611118	3.76059	1.99573	0.0595221	-0.151043	7.67223	42.9738	0.85981	2147.86
		rs4615256	0.429612	1.80498	0.811869	-3.10814	3.96736	1.53666	0.044684	52.8451
		rs4695138	0.21999	1.68721	0.89626	-3.08695	3.52693	1.24606	0.045641	34.0193
		rs4751282	-0.136844	1.96496	0.944479	-3.98817	3.71448	0.872107	0.0185336	41.0373
		rs4849291	-5.01071	2.23422	0.0249155	-9.38978	-0.631637	0.00666619	8.3574e-05	0.531721
		rs4870304	-0.735141	2.29198	0.748404	-5.22742	3.75714	0.479438	0.00536734	42.8258
		rs4880888	2.23693	1.90534	0.240382	-1.49754	5.97141	9.36458	0.22368	392.057
		rs4926571	0.842585	1.86734	0.65183	-2.81741	4.50258	2.32236	0.0597606	90.2496
		rs4958379	3.87966	1.81019	0.0320945	0.331684	7.42764	48.4078	1.39331	1681.83
		rs4972588	-1.74348	1.90923	0.361145	-5.48558	1.99861	0.17491	0.00414614	7.37882
		rs4989308	-1.29497	2.13284	0.543747	-5.47533	2.8854	0.273907	0.00418885	17.9106
		rs502654	-1.96222	1.91902	0.306537	-5.7235	1.79905	0.140546	0.00326826	6.0439
		rs512453	3.09777	2.03239	0.127458	-0.885709	7.08125	22.1486	0.412422	1189.46
		rs535446	0.699844	2.14812	0.744581	-3.51048	4.91016	2.01344	0.0298827	135.662
		rs5997110	2.3493	1.77767	0.186315	-1.13494	5.83354	10.4782	0.321442	341.565
		rs6001129	-1.81058	1.73131	0.295661	-5.20395	1.58279	0.16356	0.00549483	4.86853
		rs603446	-0.585075	1.80031	0.745192	-4.11367	2.94353	0.557064	0.0163476	18.9826
		rs6077611	-2.64629	2.14292	0.216867	-6.84641	1.55383	0.0709136	0.00106326	4.72955
		rs6110544	-2.11949	2.21035	0.337614	-6.45178	2.2128	0.120093	0.00157771	9.14131
		rs6130271	-1.00897	2.19998	0.646504	-5.32094	3.303	0.364595	0.00488817	27.1942
		rs6454864	1.16132	2.19712	0.597107	-3.14503	5.46766	3.19414	0.0430657	236.906
		rs6480970	0.265467	1.8834	0.887908	-3.42599	3.95692	1.30404	0.0325171	52.2962
		rs6534667	-2.25777	2.11963	0.286798	-6.41223	1.8967	0.104584	0.00164135	6.66386
		rs6537156	-6.2224	2.19354	0.00455843	-10.5217	-1.92305	0.00198448	2.6944e-05	0.14616
		rs6685230	0.517288	2.37232	0.827389	-4.13246	5.16704	1.67747	0.0160433	175.395
		rs6730726	2.34285	2.20802	0.28866	-1.98486	6.67056	10.4109	0.137399	788.841
		rs6759991	-0.0213242	1.47804	0.988489	-2.91828	2.87563	0.978902	0.0540264	17.7367
		rs6819555	1.56201	2.05463	0.447111	-2.46506	5.58908	4.76839	0.0850036	267.489
		rs682359	0.832941	2.0714	0.687599	-3.227	4.89288	2.30007	0.0396762	133.338
		rs6901004	2.5278	1.45749	0.082855	-0.328874	5.38448	12.526	0.719734	217.997
		rs6910731	1.11864	2.20661	0.61219	-3.20632	5.44359	3.06069	0.0405056	231.272
		rs6935961	-4.58623	1.65438	0.0055682	-7.82881	-1.34365	0.0101912	0.000398099	0.260891
		rs6947698	-2.05379	2.20979	0.35268	-6.38498	2.2774	0.128248	0.00168671	9.7513
		rs699856	-3.5547	2.21385	0.108348	-7.89385	0.784451	0.02859	0.00037303	2.1912
		rs7006068	-4.71007	1.95726	0.016108	-8.5463	-0.873837	0.00900418	0.000194263	0.417347
		rs7009696	0.702588	2.19421	0.748816	-3.59807	5.00324	2.01897	0.0273766	148.895
		rs710580	-2.26558	1.82822	0.215262	-5.8489	1.31774	0.10377	0.00288307	3.73497
		rs7109477	0.821287	1.86879	0.660317	-2.84154	4.48411	2.27342	0.058336	88.5981
		rs719564	4.82632	2.07993	0.0203181	0.749652	8.90298	124.751	2.11626	7353.89
		rs7230740	3.1527	2.06149	0.126181	-0.887809	7.19322	23.3993	0.411557	1330.38
		rs7246393	1.62227	2.0402	0.426524	-2.37652	5.62107	5.0646	0.092873	276.185
		rs7463805	-0.296355	1.65528	0.85791	-3.54071	2.948	0.743524	0.0289926	19.0679
		rs7505177	1.18832	2.0768	0.567195	-2.8822	5.25884	3.28156	0.0560111	192.259
		rs7584842	0.590984	1.79025	0.741315	-2.91791	4.09987	1.80576	0.0540467	60.3327
		rs7594598	4.65913	2.2737	0.0404484	0.202678	9.11557	105.544	1.22468	9095.84
		rs7638383	2.56053	2.02721	0.206559	-1.4128	6.53386	12.9427	0.243461	688.049
		rs7810390	-0.465773	1.99942	0.815797	-4.38464	3.45309	0.62765	0.0124674	31.5979
		rs7843149	2.86071	2.23017	0.199586	-1.51042	7.23184	17.4739	0.220817	1382.76
		rs8006663	-4.6922	1.91076	0.0140624	-8.43729	-0.9471	0.00916654	0.000216636	0.387864
		rs8021242	1.43539	1.8247	0.431491	-2.14103	5.0118	4.20127	0.117534	150.174
		rs8110890	2.70596	1.96124	0.167674	-1.13808	6.54999	14.9686	0.320434	699.237
		rs875184	-1.03075	2.19005	0.637888	-5.32325	3.26174	0.356738	0.00487688	26.095
		rs875283	-3.26456	2.06388	0.113704	-7.30976	0.78064	0.0382138	0.00066898	2.18287
		rs881562	3.37807	2.01477	0.0936103	-0.570877	7.32701	29.3141	0.565029	1520.83
		rs893922	4.98219	2.11306	0.0183834	0.840584	9.1238	145.793	2.31772	9170.95
		rs915281	0.767929	2.15074	0.721052	-3.44753	4.98339	2.1553	0.0318242	145.968
		rs928963	-1.03615	2.13054	0.626732	-5.212	3.13971	0.354819	0.00545075	23.0971
		rs9315440	-0.179126	1.89904	0.924851	-3.90124	3.54299	0.836001	0.0202168	34.57
		rs9330454	-0.169274	1.3934	0.903309	-2.90034	2.56179	0.844277	0.0550046	12.959
		rs937382	1.29848	1.9434	0.504038	-2.51058	5.10754	3.66373	0.0812215	165.263
		rs938040	-1.32898	1.97526	0.501066	-5.20048	2.54252	0.264747	0.0055139	12.7117
		rs9464137	-1.06926	2.14455	0.618066	-5.27257	3.13405	0.343264	0.00513042	22.9669
		rs9511152	-2.0933	1.76073	0.234487	-5.54433	1.35773	0.12328	0.00390954	3.88738
		rs9517869	2.18011	2.03275	0.283499	-1.80409	6.1643	8.84727	0.164625	475.47
		rs9523030	2.10123	2.17741	0.334537	-2.16649	6.36895	8.17624	0.11458	583.445
		rs9541214	3.5424	2.17347	0.103136	-0.717595	7.8024	34.5499	0.487925	2446.48
		rs9543391	0.45728	2.31983	0.843735	-4.08959	5.00415	1.57977	0.0167461	149.03
		rs9610322	2.09433	2.04817	0.306527	-1.92009	6.10875	8.12	0.146594	449.775
		rs9646527	3.07012	2.26325	0.174936	-1.36584	7.5061	21.5446	0.255165	1819.1
		rs9649963	-2.4779	2.19959	0.259941	-6.78909	1.83328	0.0839191	0.00112599	6.2544
		rs972459	0.0402318	1.77389	0.981906	-3.43659	3.51705	1.04105	0.0321743	33.685
		rs9989564	0.210568	2.08154	0.919424	-3.86924	4.29038	1.23438	0.0208742	72.994
		All - Inverse variance weighted	0.0150521	0.195417	0.938603	-0.367965	0.398069	1.01517	0.692142	1.48895
		All - MR Egger	-0.246268	1.04011	0.813142	-2.28488	1.79234	0.781712	0.101787	6.00348
	Tyrosine	SNP	b	se	p	lo_ci	up_ci	or	or_lci95	or_uci95
		rs10025494	-0.0666393	0.438858	0.879307	-0.926801	0.793522	0.935533	0.395818	2.21117
		rs10493013	0.273685	0.588131	0.641683	-0.879052	1.42642	1.3148	0.415176	4.16377
		rs11024636	-0.414473	0.43482	0.340486	-1.26672	0.437774	0.660688	0.281754	1.54925
		rs111478839	0.797792	1.03504	0.440837	-1.2309	2.82648	2.22063	0.292031	16.8859
		rs11263465	0.157239	0.482949	0.744741	-0.78934	1.10382	1.17028	0.454144	3.01566
		rs1126671	-0.156398	0.235126	0.505944	-0.617245	0.304449	0.855219	0.539429	1.35588
		rs112811496	-0.0689883	0.290363	0.812197	-0.6381	0.500124	0.933338	0.528295	1.64892
		rs115281911	0.802893	0.512674	0.117328	-0.201949	1.80773	2.23199	0.817137	6.09662
		rs116862171	0.499328	0.338368	0.140025	-0.163872	1.16253	1.64761	0.84885	3.19801
		rs117975574	0.313011	0.413681	0.449261	-0.497804	1.12383	1.36754	0.607864	3.0766
		rs12206654	0.0399458	0.076721	0.602601	-0.110427	0.190319	1.04075	0.895451	1.20964
		rs12435428	0.475198	0.399026	0.233694	-0.306892	1.25729	1.60833	0.73573	3.51587
		rs1248666	-0.101133	0.439947	0.818188	-0.963429	0.761163	0.903813	0.381582	2.14076
		rs12811045	0.51152	0.471263	0.277734	-0.412155	1.43519	1.66782	0.662222	4.20046
		rs13135092	-1.51754	0.879439	0.084423	-3.24124	0.206158	0.21925	0.0391152	1.22895
		rs1345901	-0.0439928	0.474236	0.92609	-0.973495	0.885509	0.956961	0.377761	2.42422
		rs141731602	-0.181993	0.806938	0.821563	-1.76359	1.39961	0.833607	0.171428	4.0536
		rs1426962	0.291901	0.523588	0.577185	-0.734331	1.31813	1.33897	0.479826	3.73644
		rs143205225	-0.195367	0.361232	0.588621	-0.903382	0.512648	0.822533	0.405197	1.66971
		rs1433210	-0.31487	0.381387	0.409036	-1.06239	0.432649	0.729883	0.345629	1.54134
		rs1447449	-0.824255	0.472984	0.0813914	-1.7513	0.102794	0.438562	0.173548	1.10826
		rs145989179	-0.441606	0.386335	0.253012	-1.19882	0.315611	0.643003	0.301549	1.3711
		rs148165862	-1.44664	0.476226	0.00238381	-2.38004	-0.513235	0.23536	0.0925467	0.598556
		rs1550335	-0.115845	0.402888	0.773702	-0.905505	0.673815	0.890613	0.404338	1.96171
		rs1626109	0.289444	0.484649	0.550358	-0.660468	1.23936	1.33568	0.51661	3.45339
		rs1660613	0.709422	0.472519	0.133262	-0.216716	1.63556	2.03281	0.805159	5.13233
		rs17050272	-0.42652	0.395519	0.280863	-1.20174	0.348697	0.652777	0.300671	1.41722
		rs17232826	-0.0753598	0.491334	0.8781	-1.03838	0.887656	0.92741	0.354029	2.42943
		rs174547	0.401066	0.261994	0.125814	-0.112443	0.914575	1.49342	0.893648	2.49571
		rs17690703	-1.45606	0.644341	0.0238361	-2.71897	-0.193149	0.233154	0.0659429	0.824359
		rs17817288	0.421457	0.401038	0.293297	-0.364577	1.20749	1.52418	0.69449	3.34508
		rs1800961	-0.134862	0.288342	0.639989	-0.700013	0.430289	0.873837	0.496579	1.5377
		rs1861179	0.317445	0.464329	0.494188	-0.592641	1.22753	1.37361	0.552865	3.41279
		rs194749	-0.597768	0.367122	0.103471	-1.31733	0.121791	0.550038	0.26785	1.12952
		rs2053701	1.09986	0.497497	0.0270504	0.124767	2.07495	3.00375	1.13288	7.96418
		rs2168101	-0.226989	0.294294	0.440529	-0.803805	0.349827	0.79693	0.447623	1.41882
		rs2230681	-0.249606	0.254648	0.326988	-0.748717	0.249505	0.779108	0.472973	1.28339
		rs2424641	0.455282	0.48119	0.344068	-0.48785	1.39841	1.57662	0.613945	4.04877
		rs2434068	-1.12153	0.507688	0.0271684	-2.1166	-0.12646	0.325781	0.120441	0.881209
		rs2638315	-0.121663	0.168438	0.470111	-0.451801	0.208476	0.885447	0.636481	1.2318
		rs2729363	-0.823982	0.473094	0.081563	-1.75125	0.103282	0.438681	0.173557	1.1088
		rs28601761	0.147707	0.236953	0.533048	-0.316721	0.612134	1.15917	0.728534	1.84436
		rs28733806	1.00818	0.382064	0.0083209	0.259331	1.75702	2.7406	1.29606	5.79516
		rs330095	-0.8167	0.440486	0.0637262	-1.68005	0.0466517	0.441887	0.186364	1.04776
		rs34894639	0.285972	0.292141	0.327637	-0.286623	0.858568	1.33106	0.750794	2.35978
		rs35207259	0.232753	0.333612	0.485379	-0.421126	0.886632	1.26207	0.656307	2.42694
		rs35614968	0.208982	0.17185	0.223958	-0.127844	0.545809	1.23242	0.87999	1.726
		rs36055409	0.195764	0.399733	0.62432	-0.587712	0.97924	1.21624	0.555597	2.66243
		rs3747207	-0.461308	0.355678	0.194636	-1.15844	0.23582	0.630458	0.313977	1.26595
		rs3799350	1.77978	0.457173	9.90055e-05	0.883722	2.67584	5.92855	2.41989	14.5245
		rs4149056	0.121629	0.182633	0.505425	-0.236331	0.47959	1.12934	0.789519	1.61541
		rs4665972	-1.2757	0.392771	0.00116235	-2.04553	-0.505874	0.279234	0.129311	0.602979
		rs55747707	0.202962	0.477524	0.670815	-0.732986	1.13891	1.22503	0.480472	3.12336
		rs56236906	0.158257	0.586697	0.787358	-0.991668	1.30818	1.17147	0.370957	3.69944
		rs56291006	0.0612721	0.428183	0.886213	-0.777967	0.900511	1.06319	0.459339	2.46086
		rs58158339	0.364935	0.433473	0.399851	-0.484672	1.21454	1.44042	0.615899	3.36875
		rs6129629	0.0348508	0.437055	0.936444	-0.821778	0.891479	1.03547	0.439649	2.43874
		rs61676179	0.313554	0.284801	0.270915	-0.244656	0.871764	1.36828	0.782974	2.39113
		rs61926203	0.595737	0.619705	0.33639	-0.618886	1.81036	1.81437	0.538544	6.11264
		rs62106258	0.945849	0.66134	0.152659	-0.350376	2.24207	2.575	0.704423	9.41284
		rs635634	0.285796	0.428068	0.504362	-0.553217	1.12481	1.33082	0.575097	3.07963
		rs6575900	-0.2214	0.314866	0.481958	-0.838537	0.395737	0.801396	0.432343	1.48548
		rs67549392	0.0168281	0.469966	0.971436	-0.904305	0.937961	1.01697	0.404823	2.55477
		rs6868618	-0.155982	0.35135	0.657078	-0.844629	0.532665	0.855574	0.429717	1.70347
		rs7005453	-0.159005	0.437311	0.71616	-1.01613	0.698125	0.852992	0.361992	2.00998
		rs7019778	-0.879809	0.351842	0.0123991	-1.56942	-0.190198	0.414862	0.208166	0.826795
		rs7034933	-0.245197	0.437181	0.574893	-1.10207	0.611677	0.78255	0.332182	1.84352
		rs715	-0.461154	0.310796	0.137867	-1.07031	0.148007	0.630556	0.342901	1.15952
		rs7209951	-0.124978	0.302565	0.679562	-0.718004	0.468049	0.882517	0.487725	1.59688
		rs73198247	-0.0821583	0.447385	0.854295	-0.959033	0.794716	0.921126	0.383263	2.21381
		rs740122	-0.28863	0.321645	0.369528	-0.919054	0.341793	0.749289	0.398896	1.40747
		rs74950025	0.216018	0.531256	0.684289	-0.825243	1.25728	1.24112	0.438128	3.51584
		rs753381	0.247086	0.452084	0.584689	-0.638999	1.13317	1.28029	0.527821	3.10549
		rs75460349	0.35661	0.368774	0.333537	-0.366187	1.07941	1.42848	0.693373	2.94294
		rs75661418	-0.455122	0.450303	0.31216	-1.33772	0.427473	0.634371	0.262444	1.53338
		rs7570775	-0.129273	0.478031	0.786831	-1.06621	0.807668	0.878734	0.344309	2.24267
		rs76089176	-0.473611	0.458173	0.301279	-1.37163	0.424408	0.62275	0.253693	1.52868
		rs7624902	0.389196	0.45552	0.392883	-0.503622	1.28202	1.47579	0.604338	3.6039
		rs7786102	-0.079306	0.360945	0.826091	-0.786759	0.628147	0.923757	0.455318	1.87413
		rs78787298	0.692507	0.431612	0.108612	-0.153453	1.53847	1.99872	0.857741	4.65745
		rs79020793	-0.181436	0.211019	0.389896	-0.595034	0.232162	0.834072	0.551544	1.26132
		rs79687284	0.301193	0.644378	0.640202	-0.961789	1.56417	1.35147	0.382209	4.77873
		rs7979473	0.265112	0.144306	0.0661875	-0.0177278	0.547952	1.30358	0.982428	1.72971
		rs8081539	0.602888	0.495104	0.223338	-0.367516	1.57329	1.82739	0.692452	4.8225
		rs8100204	0.206279	0.434839	0.635229	-0.646006	1.05856	1.2291	0.524135	2.88223
		rs9311400	-1.08488	0.467087	0.0201977	-2.00037	-0.169392	0.337941	0.135285	0.844178
		rs951506	-0.543119	0.506914	0.283979	-1.53667	0.450431	0.580933	0.215096	1.56899
		rs987951	0.341647	0.478588	0.475311	-0.596385	1.27968	1.40726	0.550799	3.59548
		rs9892018	-0.479795	0.5004	0.337648	-1.46058	0.500989	0.61891	0.232102	1.65035
		rs9940990	-0.0692836	0.184557	0.707359	-0.431015	0.292448	0.933062	0.649849	1.3397
		All - Inverse variance weighted	0.00632927	0.0420108	0.880245	-0.0760118	0.0886704	1.00635	0.926805	1.09272
		All - MR Egger	0.0797622	0.0780954	0.309891	-0.0733047	0.232829	1.08303	0.929318	1.26217
	Phenylalanine	SNP	b	se	p	lo_ci	up_ci	or	or_lci95	or_uci95
		rs10417567	-0.142773	0.410675	0.728099	-0.947696	0.662149	0.86695	0.387633	1.93895
		rs10823138	-0.0138424	0.307168	0.964056	-0.615891	0.588206	0.986253	0.54016	1.80076
		rs11075987	0.227155	0.420402	0.58897	-0.596832	1.05114	1.25502	0.550553	2.86092
		rs112098771	-0.775661	0.495185	0.117253	-1.74622	0.194901	0.460399	0.174431	1.21519
		rs115634543	-0.0129475	0.58522	0.982349	-1.15998	1.13408	0.987136	0.313493	3.10832
		rs11609235	-0.0341707	0.473599	0.942482	-0.962425	0.894084	0.966406	0.381965	2.44509
		rs12933650	0.0228071	0.490228	0.962893	-0.938041	0.983655	1.02307	0.391394	2.67421
		rs1498694	-0.0313703	0.0818267	0.701442	-0.191751	0.12901	0.969117	0.825513	1.1377
		rs16921251	0.132514	0.639484	0.835838	-1.12087	1.3859	1.1417	0.325994	3.99844
		rs17151796	-1.66639	0.498137	0.000822123	-2.64274	-0.690038	0.188928	0.0711663	0.501557
		rs17253619	0.0647396	0.210595	0.758529	-0.348027	0.477506	1.06688	0.70608	1.61205
		rs17373598	-0.228886	0.46235	0.620565	-1.13509	0.677319	0.795419	0.321393	1.96859
		rs17536700	-1.04103	0.653522	0.111171	-2.32193	0.239875	0.353091	0.0980838	1.27109
		rs2180314	-0.0495872	0.383611	0.897149	-0.801465	0.70229	0.951622	0.448671	2.01837
		rs2978487	0.500424	0.423993	0.237896	-0.330603	1.33145	1.64942	0.71849	3.78653
		rs35244631	0.299541	0.44758	0.503339	-0.577717	1.1768	1.34924	0.561178	3.24397
		rs35995393	0.387597	0.456558	0.395906	-0.507256	1.28245	1.47344	0.602146	3.60546
		rs4236903	-0.311876	0.413489	0.450696	-1.12231	0.498562	0.732072	0.325526	1.64635
		rs4781730	-0.279101	0.358818	0.436666	-0.982383	0.424182	0.756464	0.374418	1.52834
		rs487423	0.598371	0.497614	0.229178	-0.376953	1.57369	1.81915	0.685949	4.82444
		rs641154	0.330719	0.475722	0.486933	-0.601695	1.26313	1.39197	0.547882	3.53649
		rs6458399	-0.381003	0.45502	0.402406	-1.27284	0.510837	0.683176	0.280034	1.66669
		rs6480462	0.341801	0.395788	0.38781	-0.433943	1.11755	1.40748	0.647949	3.05734
		rs6964674	0.0544284	0.520273	0.916681	-0.965308	1.07416	1.05594	0.380866	2.92755
		rs715	-0.501913	0.338266	0.137867	-1.16492	0.161088	0.605371	0.311949	1.17479
		rs72878921	0.21228	0.482315	0.659846	-0.733059	1.15762	1.23649	0.480437	3.18234
		rs73079476	0.20071	0.365284	0.582688	-0.515247	0.916667	1.22227	0.597353	2.50094
		rs7312381	0.350558	0.428205	0.412976	-0.488724	1.18984	1.41986	0.613409	3.28655
		rs75627186	1.15474	0.593946	0.0518733	-0.00939423	2.31887	3.1732	0.99065	10.1642
		rs76358507	0.555315	0.522302	0.287688	-0.468396	1.57903	1.74249	0.626005	4.85023
		rs788460	-0.128538	0.566545	0.820516	-1.23897	0.98189	0.87938	0.289683	2.6695
		rs79020793	-0.343339	0.399321	0.389896	-1.12601	0.439331	0.709398	0.324325	1.55167
		rs79286417	0.146952	0.7533	0.845332	-1.32952	1.62342	1.1583	0.264605	5.0704
		rs7951832	-0.150127	0.389412	0.699851	-0.913375	0.613121	0.860599	0.401168	1.84618
		rs7969789	-0.0724309	0.171747	0.673222	-0.409055	0.264193	0.93013	0.664278	1.30238
		rs7980492	0.306982	0.37669	0.415102	-0.43133	1.04529	1.35932	0.649645	2.84424
		rs80258332	-0.633077	0.414644	0.126812	-1.44578	0.179625	0.530955	0.235562	1.19677
		rs9317013	-0.021807	0.479945	0.963759	-0.962498	0.918884	0.978429	0.381937	2.50649
		rs9467618	-1.10228	0.344702	0.00138488	-1.7779	-0.426667	0.332112	0.168993	0.652681
		rs9523601	0.533659	0.420999	0.20494	-0.291499	1.35882	1.70516	0.747143	3.89159
		All - Inverse variance weighted	-0.045836	0.055455	0.408495	-0.154528	0.0628558	0.955199	0.85682	1.06487
		All - MR Egger	-0.10006	0.103041	0.337656	-0.30202	0.101901	0.904783	0.739323	1.10727
	Glutamate	SNP	b	se	p	lo_ci	up_ci	or	or_lci95	or_uci95
		rs10879778	-1.36129	0.492149	0.00567456	-2.32591	-0.39668	0.256329	0.097695	0.672549
		rs2037458	-0.280835	0.503621	0.577096	-1.26793	0.706262	0.755153	0.281413	2.0264
		rs4149121	1.19753	0.560429	0.0326133	0.0990906	2.29597	3.31193	1.10417	9.93409
		rs992534	-0.278517	0.563082	0.620862	-1.38216	0.825123	0.756906	0.251037	2.28216
		All - Inverse variance weighted	-0.263245	0.521891	0.613976	-1.28615	0.759661	0.768554	0.276332	2.13755
		All - MR Egger	-7.19543	6.34808	0.374595	-19.6377	5.24681	0.000750006	2.96121e-09	189.959
	Glycine	SNP	b	se	p	lo_ci	up_ci	or	or_lci95	or_uci95
		rs10190808	0.161545	0.330283	0.624763	-0.485809	0.8089	1.17533	0.615199	2.24544
		rs1047891	0.0260157	0.017548	0.138197	-0.00837849	0.0604098	1.02636	0.991657	1.06227
		rs10934753	-0.0699235	0.129389	0.588913	-0.323526	0.183679	0.932465	0.723593	1.20163
		rs11098665	0.213135	0.452662	0.63775	-0.674083	1.10035	1.23755	0.509624	3.00523
		rs11130192	-0.292953	0.381495	0.442542	-1.04068	0.454777	0.746057	0.353213	1.57582
		rs111504781	0.330378	0.326126	0.311042	-0.308829	0.969585	1.39149	0.734306	2.63685
		rs112247225	-0.200874	0.117535	0.0874391	-0.431242	0.0294937	0.818015	0.649702	1.02993
		rs11242109	-0.677344	0.408994	0.0976966	-1.47897	0.124283	0.507964	0.227872	1.13234
		rs114394242	-1.40895	0.900221	0.117557	-3.17338	0.355487	0.244401	0.0418619	1.42688
		rs11666281	-0.303732	0.2688	0.258494	-0.83058	0.223115	0.738058	0.435797	1.24996
		rs117249010	0.302637	1.17582	0.796884	-2.00198	2.60725	1.35342	0.135068	13.5617
		rs118057622	0.999837	0.650079	0.124043	-0.274318	2.27399	2.71784	0.76009	9.71812
		rs12005290	-0.569146	0.491178	0.246563	-1.53185	0.393562	0.566009	0.216135	1.48225
		rs1209623	-0.258734	0.57571	0.653131	-1.38712	0.869658	0.772029	0.249792	2.38609
		rs12307895	-0.602916	0.276229	0.0290603	-1.14432	-0.0615071	0.547214	0.318439	0.940346
		rs1243473	0.325478	0.645981	0.614366	-0.940644	1.5916	1.38469	0.390376	4.9116
		rs12566232	0.222303	0.450421	0.621627	-0.660522	1.10513	1.24895	0.516582	3.01961
		rs12573237	-0.334378	0.512707	0.514284	-1.33928	0.670527	0.715783	0.262034	1.95527
		rs12811045	-0.54613	0.503149	0.277734	-1.5323	0.440041	0.579187	0.216038	1.55277
		rs13107325	-1.08776	0.762966	0.153955	-2.58317	0.407653	0.33697	0.0755338	1.50329
		rs140695755	0.900474	0.596313	0.131026	-0.268299	2.06925	2.46077	0.764679	7.91886
		rs144132875	-0.0250911	0.613926	0.9674	-1.22839	1.1782	0.975221	0.292765	3.24853
		rs145678014	-1.38117	0.62667	0.0275253	-2.60944	-0.152899	0.251284	0.0735755	0.858217
		rs147504633	-0.0315996	0.466589	0.946005	-0.946114	0.882915	0.968894	0.388247	2.41794
		rs149181595	1.06493	0.628758	0.0903212	-0.167435	2.2973	2.90064	0.845832	9.94725
		rs17036342	0.174556	0.347931	0.61588	-0.507388	0.856501	1.19072	0.602066	2.35491
		rs17114722	0.0830243	0.464464	0.858132	-0.827324	0.993373	1.08657	0.437218	2.70033
		rs17442300	-0.531695	0.412589	0.197509	-1.34037	0.276979	0.587608	0.261749	1.31914
		rs1801133	0.231046	0.444124	0.602905	-0.639437	1.10153	1.25992	0.52759	3.00876
		rs192322963	-0.591603	0.706522	0.402398	-1.97639	0.79318	0.553439	0.138569	2.21041
		rs1936789	0.0764617	0.486876	0.875209	-0.877815	1.03074	1.07946	0.41569	2.80313
		rs1965869	0.0753299	0.389998	0.846838	-0.689067	0.839726	1.07824	0.502044	2.31573
		rs2009509	-0.436737	0.464152	0.346738	-1.34648	0.473001	0.646141	0.260156	1.6048
		rs2026972	0.193277	0.118034	0.101533	-0.0380699	0.424624	1.21322	0.962646	1.52902
		rs2123003	0.21031	0.448738	0.639305	-0.669215	1.08984	1.23406	0.51211	2.97379
		rs2133899	1.67266	0.580896	0.00398367	0.534106	2.81122	5.32633	1.70592	16.6302
		rs2168101	-0.239535	0.31056	0.440529	-0.848233	0.369163	0.786994	0.428171	1.44652
		rs2246199	-0.0671356	0.767716	0.930315	-1.57186	1.43759	0.935068	0.207659	4.21053
		rs2608913	-0.100625	0.395071	0.798955	-0.874964	0.673714	0.904272	0.416877	1.96151
		rs2657879	-0.164987	0.237138	0.486591	-0.629778	0.299804	0.847905	0.53271	1.34959
		rs2711697	-0.447851	0.365375	0.2203	-1.16399	0.268283	0.639	0.312239	1.30772
		rs28435239	0.65151	0.336212	0.0526485	-0.00746623	1.31049	1.91844	0.992562	3.70798
		rs28601761	-0.0909802	0.145952	0.533048	-0.377045	0.195085	0.913036	0.685885	1.21541
		rs2967	-0.570558	0.580403	0.325589	-1.70815	0.567032	0.56521	0.181201	1.76303
		rs2972154	-0.251377	0.394326	0.52381	-1.02426	0.521503	0.777729	0.359063	1.68456
		rs34439264	-0.169096	0.39204	0.666234	-0.937495	0.599303	0.844428	0.391608	1.82085
		rs34453616	-0.988395	0.505909	0.0507369	-1.97998	0.00318806	0.372174	0.138072	1.00319
		rs34505073	-0.196531	0.504158	0.696669	-1.18468	0.791618	0.821576	0.305844	2.20696
		rs34536774	0.743333	0.404124	0.0658608	-0.0487496	1.53542	2.10293	0.95242	4.64326
		rs34656869	-1.08922	0.539881	0.0436422	-2.14738	-0.0310492	0.33648	0.116789	0.969428
		rs34945403	-0.0395641	0.348631	0.909647	-0.72288	0.643752	0.961208	0.485352	1.90361
		rs35484034	-0.617274	0.394015	0.117202	-1.38954	0.154995	0.539413	0.249189	1.16765
		rs35626482	0.240881	0.585587	0.680816	-0.90687	1.38863	1.27237	0.403786	4.00936
		rs36105243	0.230153	0.361463	0.524303	-0.478315	0.938621	1.25879	0.619827	2.55645
		rs3736951	0.059949	0.403641	0.881932	-0.731188	0.851086	1.06178	0.481337	2.34219
		rs3782860	0.369386	0.336431	0.272224	-0.290019	1.02879	1.44685	0.74825	2.79768
		rs3936511	0.213754	0.503232	0.67101	-0.772581	1.20009	1.23832	0.461819	3.32042
		rs4240624	-0.0895421	0.0982595	0.362147	-0.282131	0.103047	0.91435	0.754175	1.10854
		rs4254836	0.397532	0.453889	0.38112	-0.492091	1.28715	1.48815	0.611347	3.62246
		rs4493564	0.0844781	0.485491	0.861861	-0.867085	1.03604	1.08815	0.420175	2.81804
		rs45446698	0.624586	0.434626	0.1507	-0.227282	1.47645	1.86747	0.796696	4.37739
		rs489009	0.339461	0.536804	0.527143	-0.712675	1.3916	1.40419	0.490331	4.02127
		rs4948102	-0.146476	0.156505	0.349314	-0.453225	0.160273	0.863746	0.635575	1.17383
		rs499600	0.071216	0.440534	0.871575	-0.792232	0.934664	1.07381	0.452833	2.54636
		rs555754	0.243627	0.376591	0.51768	-0.494491	0.981745	1.27587	0.609881	2.66911
		rs55727466	-0.4679	0.485396	0.335068	-1.41928	0.483475	0.626316	0.241889	1.6217
		rs56113850	0.29868	0.411354	0.467784	-0.507574	1.10493	1.34808	0.601954	3.01903
		rs561931	-0.106908	0.310133	0.730308	-0.714769	0.500954	0.898609	0.489305	1.65029
		rs56311083	-0.0445241	0.552448	0.935765	-1.12732	1.03827	0.956453	0.323899	2.82434
		rs59668107	0.161288	0.535206	0.763142	-0.887716	1.21029	1.17502	0.411595	3.35447
		rs6125987	0.00697375	0.419344	0.986732	-0.81494	0.828888	1.007	0.442666	2.29077
		rs61789561	-1.08732	0.507979	0.0323155	-2.08296	-0.0916828	0.337119	0.124561	0.912395
		rs62073965	0.352888	0.221009	0.110329	-0.0802891	0.786064	1.42317	0.922849	2.19474
		rs62203720	-0.14132	0.332554	0.67087	-0.793126	0.510486	0.868211	0.452428	1.6661
		rs62357251	0.358306	0.731464	0.624242	-1.07536	1.79198	1.4309	0.341174	6.0013
		rs6449313	-0.869664	0.549058	0.113212	-1.94582	0.206489	0.419092	0.14287	1.22935
		rs6601302	-0.677648	0.360306	0.0600052	-1.38385	0.0285524	0.50781	0.250612	1.02896
		rs6879874	-0.526176	0.440694	0.23249	-1.38994	0.337585	0.59086	0.249091	1.40156
		rs6963105	-0.764113	0.473821	0.106818	-1.6928	0.164577	0.465747	0.184003	1.17889
		rs7078003	0.199045	0.432297	0.645204	-0.648258	1.04635	1.22024	0.522956	2.84723
		rs7120967	0.941305	1.0341	0.362685	-1.08554	2.96815	2.56333	0.337719	19.4559
		rs7188156	0.31022	0.366809	0.397706	-0.408727	1.02917	1.36372	0.664496	2.79873
		rs7252042	-0.379123	0.483111	0.432599	-1.32602	0.567776	0.684461	0.265532	1.76434
		rs72675794	-0.110895	0.504076	0.825873	-1.09888	0.877093	0.895032	0.333243	2.4039
		rs72760801	1.05679	0.538136	0.0495524	0.00204886	2.11154	2.87713	1.00205	8.26096
		rs72776460	-0.132883	0.36771	0.717816	-0.853594	0.587829	0.875568	0.425881	1.80008
		rs72805967	0.233203	0.441967	0.597744	-0.633052	1.09946	1.26264	0.530969	3.00254
		rs75604103	0.321768	0.135107	0.0172386	0.0569583	0.586578	1.37956	1.05861	1.79783
		rs76013262	-0.609462	0.319365	0.0563454	-1.23542	0.0164938	0.543644	0.290714	1.01663
		rs76796332	-0.840969	0.994383	0.397709	-2.78996	1.10802	0.431292	0.0614237	3.02836
		rs7704653	-0.128217	0.323963	0.692269	-0.763184	0.50675	0.879662	0.46618	1.65989
		rs77515689	-0.695492	0.421097	0.0986127	-1.52084	0.129859	0.498829	0.218528	1.13867
		rs7828769	-0.462747	0.535728	0.387713	-1.51277	0.587279	0.629552	0.220298	1.79909
		rs78303916	0.498853	0.547777	0.362461	-0.57479	1.5725	1.64683	0.562823	4.81866
		rs78312207	0.610448	0.437158	0.162593	-0.246381	1.46728	1.84126	0.781624	4.33741
		rs79325880	0.361626	0.198995	0.069177	-0.0284042	0.751657	1.43566	0.971995	2.12051
		rs79687284	0.232746	0.497943	0.640202	-0.743221	1.20871	1.26206	0.475579	3.34918
		rs8127409	-0.588165	0.50101	0.240411	-1.57014	0.393814	0.555345	0.208015	1.48262
		rs9636331	0.117208	0.210181	0.577081	-0.294747	0.529163	1.12435	0.74472	1.69751
		rs9922910	0.0238089	0.103179	0.817508	-0.178423	0.226041	1.02409	0.836589	1.25363
		All - Inverse variance weighted	0.0141433	0.017308	0.41384	-0.0197804	0.0480671	1.01424	0.980414	1.04924
		All - MR Egger	0.0306767	0.0201569	0.131257	-0.00883094	0.0701843	1.03115	0.991208	1.07271
	propionic acid	SNP	b	se	p	lo_ci	up_ci	or	or_lci95	or_uci95
		rs11086551	-0.0717908	0.0911661	0.431005	-0.250476	0.106895	0.930726	0.77843	1.11282
		rs11222629	-0.241721	0.0964872	0.0122378	-0.430836	-0.0526059	0.785275	0.649966	0.948754
		rs11656534	-0.0651541	0.0870532	0.454195	-0.235778	0.10547	0.936923	0.789956	1.11123
		rs118130185	0.107209	0.0920712	0.244255	-0.0732504	0.287669	1.11317	0.929368	1.33332
		rs12680053	0.118837	0.117581	0.312168	-0.111622	0.349296	1.12619	0.894383	1.41807
		rs12891984	0.202773	0.112725	0.0720457	-0.018168	0.423714	1.22479	0.981996	1.52762
		rs13208940	0.109899	0.124586	0.377718	-0.13429	0.354088	1.11617	0.874336	1.42488
		rs17595094	0.183639	0.126975	0.148104	-0.0652319	0.432509	1.20158	0.93685	1.54112
		rs2027038	-0.022309	0.102789	0.82818	-0.223776	0.179158	0.977938	0.799494	1.19621
		rs2281391	0.0281152	0.102285	0.783414	-0.172363	0.228593	1.02851	0.841674	1.25683
		rs4676410	-0.153526	0.101476	0.130295	-0.352419	0.0453655	0.857678	0.702986	1.04641
		rs4756895	-0.0545598	0.101459	0.59075	-0.25342	0.144301	0.946902	0.776142	1.15523
		rs4789403	-0.159493	0.109549	0.145418	-0.374208	0.0552228	0.852576	0.687834	1.05678
		rs563487	0.202932	0.0965373	0.0355433	0.0137193	0.392145	1.22499	1.01381	1.48015
		rs6737854	-0.187731	0.106686	0.0784648	-0.396836	0.021373	0.828837	0.672444	1.0216
		rs7306365	0.0183833	0.108632	0.86562	-0.194536	0.231303	1.01855	0.823216	1.26024
		rs73862615	-0.0248866	0.10964	0.820435	-0.23978	0.190007	0.975421	0.786801	1.20926
		rs75561980	0.0265941	0.132566	0.841003	-0.233235	0.286423	1.02695	0.791967	1.33166
		rs76312928	0.322526	0.114447	0.00483028	0.0982111	0.546841	1.38061	1.1032	1.72779
		rs76668889	0.0531135	0.0929033	0.567521	-0.128977	0.235204	1.05455	0.878994	1.26517
		rs76808847	0.051615	0.107009	0.629564	-0.158123	0.261353	1.05297	0.853745	1.29869
		rs9360322	0.271158	0.100631	0.00704783	0.0739212	0.468395	1.31148	1.07672	1.59743
		All - Inverse variance weighted	0.0236944	0.031837	0.456732	-0.0387062	0.086095	1.02398	0.962033	1.08991
		All - MR Egger	0.115586	0.0835067	0.181564	-0.048087	0.279259	1.12253	0.953051	1.32215
	Trimethylamino oxide（TMAO）	SNP	b	se	p	lo_ci	up_ci	or	or_lci95	or_uci95
		rs10433885	0.0121559	0.032573	0.709008	-0.0516873	0.075999	1.01223	0.949626	1.07896
		rs115977728	-0.0287813	0.05568	0.605222	-0.137914	0.0803515	0.971629	0.871173	1.08367
		rs12938132	-0.0204674	0.0678093	0.762776	-0.153374	0.112439	0.979741	0.857809	1.119
		rs144875854	0.115843	0.0590247	0.0496914	0.000154112	0.231531	1.12282	1.00015	1.26053
		rs150614911	-0.056016	0.0571202	0.326757	-0.167972	0.0559397	0.945524	0.845378	1.05753
		rs17198295	-0.05225	0.0329565	0.11287	-0.116845	0.0123448	0.949092	0.889723	1.01242
		rs187795813	0.0345842	0.0668658	0.605004	-0.0964727	0.165641	1.03519	0.908035	1.18015
		rs2714372	0.0580634	0.0576057	0.31348	-0.0548437	0.170971	1.05978	0.946633	1.18646
		rs2806545	0.0177002	0.0561419	0.752552	-0.0923379	0.127738	1.01786	0.911797	1.13626
		rs35575634	-0.0120278	0.060925	0.843499	-0.131441	0.107385	0.988044	0.876831	1.11336
		rs4743557	0.0463937	0.0525086	0.376942	-0.0565232	0.149311	1.04749	0.945045	1.16103
		rs483366	0.0139969	0.0599369	0.815352	-0.103479	0.131473	1.0141	0.901695	1.14051
		rs55836408	0.016958	0.044081	0.700459	-0.0694407	0.103357	1.0171	0.932915	1.10889
		rs56015442	-0.0640665	0.0421602	0.128613	-0.1467	0.0185675	0.937943	0.863553	1.01874
		rs561986009	-0.0397803	0.041388	0.336474	-0.120901	0.0413402	0.961001	0.886122	1.04221
		rs565523	-0.010647	0.0644991	0.868887	-0.137065	0.115771	0.989409	0.871913	1.12274
		rs58349531	0.175455	0.12205	0.150558	-0.0637635	0.414674	1.19179	0.938227	1.51388
		rs60919944	0.0512095	0.04862	0.292222	-0.0440858	0.146505	1.05254	0.956872	1.15778
		rs73052331	0.0545771	0.0753459	0.468848	-0.0931009	0.202255	1.05609	0.911102	1.22416
		rs75051036	0.152936	0.0657688	0.0200524	0.0240297	0.281843	1.16525	1.02432	1.32557
		rs8056675	-0.039788	0.059309	0.50231	-0.156034	0.0764577	0.960993	0.85553	1.07946
		All - Inverse variance weighted	0.00357869	0.0121032	0.767473	-0.0201435	0.0273009	1.00359	0.980058	1.02768
		All - MR Egger	-0.00317527	0.0241322	0.896701	-0.0504743	0.0441238	0.99683	0.950778	1.04511
	Serotonin (5HT)	SNP	b	se	p	lo_ci	up_ci	or	or_lci95	or_uci95
		rs10516056	0.368372	0.497144	0.458708	-0.60603	1.34277	1.44538	0.545512	3.82965
		rs10881427	0.24224	0.588636	0.680686	-0.911487	1.39597	1.2741	0.401926	4.03888
		rs10953038	-0.17987	0.491541	0.714416	-1.14329	0.78355	0.835378	0.318768	2.18923
		rs11781043	0.50867	0.483526	0.292799	-0.43904	1.45638	1.66308	0.644655	4.2904
		rs12646122	0.417386	0.298676	0.162277	-0.168019	1.00279	1.51799	0.845338	2.72588
		rs17708932	-0.23444	0.250821	0.349948	-0.726049	0.25717	0.791014	0.483817	1.29326
		rs2742351	-1.28066	0.489464	0.00888506	-2.24	-0.321306	0.277855	0.106458	0.725201
		rs3753556	-0.362863	0.592873	0.54051	-1.5249	0.799168	0.695682	0.217644	2.22369
		rs5764174	0.600206	0.482366	0.213391	-0.345232	1.54564	1.82249	0.708056	4.69099
		rs6466265	0.449388	0.551355	0.415037	-0.631267	1.53004	1.56735	0.531917	4.61838
		rs7868774	0.0631043	0.57717	0.912938	-1.06815	1.19436	1.06514	0.343644	3.30144
		rs8113773	0.600552	0.551391	0.276084	-0.480175	1.68128	1.82312	0.618675	5.37242
		rs825278	-0.33433	0.202759	0.0991678	-0.731737	0.063078	0.715818	0.481072	1.06511
		rs988694	0.635068	0.606446	0.295009	-0.553566	1.8237	1.88715	0.574896	6.19474
		rs9953702	0.219719	0.612607	0.719847	-0.98099	1.42043	1.24573	0.37494	4.13889
		All - Inverse variance weighted	-0.0150683	0.121838	0.901573	-0.253871	0.223734	0.985045	0.775792	1.25074
		All - MR Egger	-0.314273	0.202895	0.145388	-0.711946	0.0834004	0.73032	0.490688	1.08698
Lower back pain or/and sciatica	3-hydroxybutyrate(BHBA)	SNP	b	se	p	lo_ci	up_ci	or	or_lci95	or_uci95
		rs11224003	-0.216899	0.237642	0.361392	-0.682677	0.248878	0.805011	0.505263	1.28259
		rs11719883	0.26284	0.184419	0.154089	-0.0986206	0.6243	1.30062	0.906086	1.86694
		rs13288937	0.246875	0.178539	0.166743	-0.103063	0.596812	1.28002	0.90207	1.81632
		rs2295758	-0.0091066	0.20258	0.964145	-0.406163	0.387949	0.990935	0.666202	1.47396
		rs2711506	0.0941693	0.228753	0.680586	-0.354187	0.542526	1.09875	0.701744	1.72035
		rs4297577	-0.125458	0.233205	0.590597	-0.582539	0.331624	0.882093	0.558479	1.39323
		rs4838537	-0.128043	0.0633497	0.0432573	-0.252209	-0.00387807	0.879815	0.777083	0.996129
		rs6493912	0.0112071	0.244206	0.963396	-0.467437	0.489851	1.01127	0.626606	1.63207
		rs7314742	0.339293	0.248133	0.171504	-0.147047	0.825633	1.40396	0.863254	2.28333
		rs8000457	0.184067	0.076614	0.0162821	0.033904	0.334231	1.2021	1.03449	1.39687
		All - Inverse variance weighted	0.0270786	0.0556605	0.626616	-0.0820161	0.136173	1.02745	0.921257	1.14588
		All - MR Egger	-0.0132585	0.0790909	0.87103	-0.168277	0.14176	0.986829	0.84512	1.1523
	Tryptophan	SNP	b	se	p	lo_ci	up_ci	or	or_lci95	or_uci95
		rs1000137	1.88469	1.48079	0.203105	-1.01767	4.78705	6.58431	0.361437	119.947
		rs10007704	0.664	1.75758	0.705586	-2.78086	4.10886	1.94255	0.0619849	60.8776
		rs1013667	-4.01593	1.85969	0.0308143	-7.66091	-0.370939	0.0180262	0.000470876	0.690086
		rs1016522	-0.0988126	1.29241	0.939056	-2.63193	2.4343	0.905912	0.0719397	11.4078
		rs10225863	1.52076	1.85315	0.411854	-2.11142	5.15294	4.57571	0.121066	172.939
		rs10495209	-3.02232	1.85493	0.103239	-6.65798	0.613333	0.0486879	0.00128373	1.84658
		rs10784496	-4.61476	1.66008	0.00543858	-7.86851	-1.361	0.0099046	0.000382603	0.256405
		rs10807322	-1.59518	1.75302	0.362842	-5.03109	1.84073	0.202872	0.00653167	6.30114
		rs10836364	-1.89364	1.53809	0.218262	-4.90829	1.12101	0.150523	0.0073851	3.06797
		rs10846667	3.253	1.6486	0.048474	0.021744	6.48426	25.8678	1.02198	654.752
		rs10881004	-0.689237	1.86281	0.711384	-4.34035	2.96188	0.501959	0.0130319	19.3343
		rs10900784	0.00846173	1.76322	0.996171	-3.44745	3.46438	1.0085	0.0318265	31.9566
		rs10927101	-0.471774	1.6449	0.774258	-3.69578	2.75223	0.623895	0.0248281	15.6776
		rs11201034	1.15771	1.7437	0.506731	-2.25995	4.57536	3.18263	0.104356	97.0633
		rs11654913	-1.21041	1.92279	0.529017	-4.97908	2.55826	0.298075	0.0068804	12.9133
		rs11719675	-3.95817	1.81468	0.0291688	-7.51494	-0.401402	0.019098	0.000544883	0.669381
		rs11720862	-0.453126	1.62137	0.779883	-3.63101	2.72476	0.635638	0.0264894	15.2527
		rs1179636	6.6066	1.6551	6.56118e-05	3.3626	9.8506	739.963	28.8643	18969.7
		rs11802417	-0.257093	1.81134	0.887132	-3.80733	3.29314	0.773297	0.0222075	26.9273
		rs1220605	0.0207678	1.73443	0.990446	-3.37871	3.42024	1.02098	0.0340915	30.5768
		rs12278762	2.99798	1.72706	0.0825843	-0.387062	6.38302	20.0449	0.679049	591.709
		rs12468084	0.171451	1.69885	0.919612	-3.15829	3.50119	1.18703	0.0424983	33.155
		rs12533939	1.19085	1.75214	0.496725	-2.24335	4.62505	3.28987	0.106102	102.007
		rs1260326	4.40007	1.84771	0.0172485	0.778565	8.02158	81.4567	2.17835	3045.98
		rs13001325	0.0380075	1.96444	0.984564	-3.81229	3.8883	1.03874	0.0220975	48.8281
		rs13008096	4.3179	1.89037	0.0223625	0.612772	8.02304	75.0313	1.84554	3050.43
		rs13122250	-1.09932	1.23481	0.373318	-3.51956	1.32091	0.333096	0.0296125	3.74683
		rs1330918	0.722938	1.76466	0.682044	-2.73579	4.18167	2.06048	0.0648425	65.4752
		rs1373962	-2.59156	1.51033	0.0861826	-5.55181	0.368691	0.0749031	0.00388042	1.44584
		rs1412972	0.300639	0.768824	0.695769	-1.20626	1.80753	1.35072	0.299316	6.0954
		rs1418942	-1.89603	1.94799	0.330392	-5.7141	1.92204	0.150164	0.00329912	6.83489
		rs1508513	-1.55102	1.9885	0.435393	-5.44848	2.34644	0.212031	0.00430283	10.4483
		rs1519309	1.21132	1.98388	0.541475	-2.67707	5.09972	3.35793	0.068764	163.977
		rs154246	-1.13429	1.5687	0.469635	-4.20895	1.94037	0.321651	0.014862	6.96134
		rs1559063	0.159123	1.49534	0.915255	-2.77175	3.09	1.17248	0.0625523	21.977
		rs1663501	-2.76504	1.57241	0.078667	-5.84697	0.316882	0.0629734	0.00288865	1.37284
		rs16836288	-0.357179	1.15446	0.757024	-2.61992	1.90556	0.699647	0.0728089	6.72316
		rs1697901	2.12145	1.64635	0.197545	-1.1054	5.3483	8.34322	0.331079	210.25
		rs17698249	-3.82266	1.916	0.046029	-7.57801	-0.0673033	0.0218696	0.000511576	0.934912
		rs17744500	0.840468	1.81107	0.642596	-2.70923	4.39017	2.31745	0.066588	80.6539
		rs1790398	2.03834	1.57066	0.194371	-1.04016	5.11683	7.67782	0.353397	166.806
		rs1852138	0.34717	1.89217	0.854424	-3.36148	4.05582	1.41506	0.0346838	57.7327
		rs1871053	-3.65543	1.70985	0.032528	-7.00675	-0.304117	0.0258503	0.00090575	0.737775
		rs1995960	0.164611	1.60018	0.918066	-2.97174	3.30096	1.17893	0.0512144	27.1386
		rs1997238	-3.10542	1.64843	0.0595829	-6.33634	0.125498	0.0448056	0.00177077	1.13371
		rs201262	-2.33198	1.60936	0.147334	-5.48632	0.822362	0.0971034	0.00414307	2.27587
		rs207938	-2.03863	1.73065	0.238815	-5.4307	1.35345	0.130208	0.00438004	3.87074
		rs2111118	1.72699	1.45434	0.235039	-1.12351	4.5775	5.62372	0.325138	97.2704
		rs2126498	-2.23817	1.81336	0.217104	-5.79236	1.31602	0.106654	0.00305078	3.72855
		rs2178260	1.71384	1.7795	0.335496	-1.77398	5.20166	5.55025	0.169657	181.574
		rs2216061	-3.2654	1.72484	0.0583371	-6.64609	0.115295	0.0381818	0.0012991	1.1222
		rs2230532	2.76096	1.51414	0.0682344	-0.206747	5.72867	15.815	0.813226	307.559
		rs2261659	2.97253	1.75506	0.0903235	-0.467384	6.41245	19.5414	0.62664	609.387
		rs2349729	-0.277951	1.86139	0.881298	-3.92628	3.37038	0.757334	0.0197169	29.0895
		rs2367059	-1.51458	1.62284	0.350673	-4.69535	1.6662	0.219901	0.00913767	5.292
		rs2383131	-1.0154	1.763	0.564648	-4.47087	2.44007	0.362257	0.0114374	11.4739
		rs2432	-2.13408	1.6213	0.18808	-5.31182	1.04366	0.118354	0.00493295	2.83959
		rs2484178	-6.39812	1.80402	0.000390257	-9.934	-2.86224	0.00166469	4.84975e-05	0.0571409
		rs2505644	1.03302	1.4982	0.490507	-1.90346	3.9695	2.80953	0.149051	52.9578
		rs2520117	-0.352787	1.64289	0.829973	-3.57285	2.86728	0.702727	0.0280758	17.589
		rs2580344	0.481652	1.76733	0.785213	-2.98231	3.94561	1.61875	0.0506757	51.7081
		rs2604365	-3.94161	1.72655	0.022434	-7.32566	-0.557571	0.0194169	0.000658428	0.572598
		rs2658761	1.91858	1.54613	0.214646	-1.11183	4.94899	6.81126	0.328956	141.032
		rs2662269	-2.26476	1.87376	0.226791	-5.93733	1.40782	0.103855	0.00263906	4.08705
		rs2688858	-1.60088	1.73053	0.354923	-4.99271	1.79095	0.201719	0.00678725	5.99515
		rs2722407	1.14469	1.83052	0.531751	-2.44313	4.73251	3.14146	0.0868884	113.58
		rs2769419	-0.751625	1.87806	0.688999	-4.43262	2.92937	0.4716	0.0118833	18.7159
		rs2798184	0.649804	1.51623	0.668239	-2.32201	3.62162	1.91517	0.0980765	37.398
		rs2834164	-0.805593	1.64326	0.623963	-4.02638	2.41519	0.446823	0.0178388	11.1919
		rs284191	-2.52088	1.28033	0.0489605	-5.03033	-0.0114398	0.0803886	0.00653667	0.988625
		rs2868072	-1.13576	1.84986	0.539235	-4.76149	2.48997	0.321178	0.00855285	12.0609
		rs295142	0.39089	1.60051	0.807054	-2.74611	3.52789	1.4783	0.0641767	34.0522
		rs2966079	3.39712	1.78593	0.0571511	-0.10331	6.89755	29.8779	0.901847	989.845
		rs2970335	-1.52047	1.81867	0.403136	-5.08506	2.04412	0.21861	0.00618853	7.72237
		rs2977272	3.8799	1.72897	0.0248287	0.491127	7.26867	48.4194	1.63416	1434.65
		rs3742929	0.855614	1.69034	0.612731	-2.45745	4.16868	2.35282	0.0856531	64.6299
		rs3751181	-4.21659	1.80377	0.0194056	-7.75198	-0.68119	0.0147489	0.00042989	0.506015
		rs3773729	3.6789	2.08481	0.0776278	-0.407332	7.76513	39.6028	0.665423	2356.97
		rs3780494	-1.16888	1.24533	0.34793	-3.60973	1.27197	0.310714	0.0270591	3.56786
		rs38271	0.158035	1.4896	0.915509	-2.76158	3.07766	1.17121	0.0631916	21.7074
		rs4063769	0.626165	1.7257	0.71672	-2.75622	4.00855	1.87042	0.0635317	55.0668
		rs4144737	-0.841777	1.9441	0.665022	-4.65222	2.96867	0.430944	0.00954037	19.466
		rs42162	2.24682	1.85814	0.226593	-1.39512	5.88877	9.45766	0.247802	360.963
		rs428185	-0.518104	1.64442	0.75271	-3.74117	2.70496	0.595649	0.0237263	14.9538
		rs4306882	0.0921272	1.30601	0.943763	-2.46765	2.6519	1.0965	0.0847839	14.181
		rs430727	-0.293034	1.83451	0.87309	-3.88867	3.3026	0.745997	0.0204726	27.1832
		rs4356783	-0.322444	1.8135	0.858879	-3.87691	3.23202	0.724377	0.0207148	25.3308
		rs4611118	0.712582	1.68309	0.672019	-2.58627	4.01143	2.03925	0.0753006	55.2258
		rs4615256	0.329953	1.52259	0.828438	-2.65431	3.31422	1.3909	0.070347	27.501
		rs4695138	0.652571	1.42159	0.646204	-2.13375	3.43889	1.92047	0.118393	31.1524
		rs4751282	-0.531173	1.65599	0.748393	-3.77691	2.71456	0.587915	0.0228934	15.098
		rs4849291	-4.21693	1.8855	0.0253184	-7.9125	-0.521356	0.0147439	0.000366139	0.593715
		rs4870304	0.147167	1.93332	0.939323	-3.64214	3.93648	1.15855	0.0261961	51.2378
		rs4880888	1.82066	1.60592	0.256914	-1.32695	4.96826	6.17591	0.265285	143.777
		rs4926571	1.27884	1.5739	0.416489	-1.80601	4.36369	3.59246	0.164308	78.5461
		rs4958379	5.0048	1.52757	0.0010517	2.01077	7.99883	149.127	7.46904	2977.48
		rs4972588	-1.7041	1.60982	0.289799	-4.85935	1.45115	0.181937	0.00775555	4.26804
		rs4989308	-0.0724642	1.79871	0.967864	-3.59793	3.453	0.930099	0.0273804	31.5951
		rs502654	-1.25604	1.61885	0.437818	-4.42898	1.9169	0.28478	0.0119267	6.79988
		rs512453	4.08239	1.71175	0.017083	0.727352	7.43742	59.2868	2.06959	1698.36
		rs535446	0.770068	1.81179	0.670813	-2.78103	4.32117	2.15991	0.0619746	75.2765
		rs5997110	1.6736	1.49916	0.264269	-1.26475	4.61195	5.33132	0.282309	100.68
		rs6001129	-0.520156	1.46118	0.721853	-3.38406	2.34375	0.594428	0.0339094	10.4203
		rs603446	-0.885314	1.51812	0.559781	-3.86082	2.09019	0.412585	0.0210507	8.08648
		rs6077611	-1.84323	1.80776	0.307908	-5.38643	1.69998	0.158306	0.00457829	5.47381
		rs6110544	-1.51398	1.86318	0.416458	-5.16582	2.13785	0.220031	0.00570839	8.48116
		rs6130271	-1.4627	1.85424	0.430206	-5.09702	2.17162	0.23161	0.00611497	8.77244
		rs6454864	-0.376145	1.85285	0.839128	-4.00774	3.25545	0.686503	0.0181745	25.9312
		rs6480970	-0.0128742	1.58863	0.993534	-3.12659	3.10084	0.987208	0.0438673	22.2166
		rs6534667	-3.34602	1.78724	0.0611832	-6.84902	0.156975	0.0352242	0.00106049	1.16997
		rs6537156	-5.62132	1.85021	0.00237982	-9.24773	-1.99492	0.00361984	9.63304e-05	0.136024
		rs6685230	0.467686	2.00131	0.815226	-3.45488	4.39025	1.5963	0.0315911	80.6608
		rs6730726	1.83474	1.86265	0.324616	-1.81605	5.48553	6.26349	0.162667	241.176
		rs6759991	-0.114881	1.24669	0.92658	-2.55838	2.32862	0.891472	0.0774297	10.2638
		rs6819555	-0.00590091	1.73363	0.997284	-3.40381	3.39201	0.994116	0.0332463	29.7256
		rs682359	-0.888989	1.74614	0.61067	-4.31142	2.53344	0.411071	0.0134145	12.5968
		rs6901004	2.19657	1.22944	0.0739954	-0.213134	4.60628	8.99414	0.808048	100.111
		rs6910731	-0.151339	1.86107	0.935189	-3.79904	3.49636	0.859556	0.0223923	32.9951
		rs6935961	-3.31288	1.39252	0.0173573	-6.04221	-0.583537	0.0364113	0.00237629	0.557922
		rs6947698	-2.4553	1.86397	0.187757	-6.10868	1.19808	0.0858372	0.00222348	3.31374
		rs699856	-2.38047	1.8677	0.202469	-6.04115	1.28021	0.0925071	0.00237882	3.5974
		rs7006068	-5.71211	1.65072	0.000539404	-8.94751	-2.47671	0.00330569	0.00013006	0.0840193
		rs7009696	1.62553	1.85021	0.379636	-2.00087	5.25194	5.08112	0.135217	190.936
		rs710580	-1.76555	1.54157	0.252088	-4.78702	1.25593	0.171093	0.00833725	3.51109
		rs7109477	-0.608704	1.57597	0.699319	-3.69761	2.4802	0.544055	0.0247827	11.9437
		rs719564	2.55166	1.75543	0.146062	-0.888978	5.9923	12.8284	0.411076	400.333
		rs7230740	1.93135	1.73719	0.266239	-1.47354	5.33624	6.89882	0.229112	207.731
		rs7246393	0.401202	1.72008	0.81557	-2.97015	3.77255	1.49362	0.0512957	43.4909
		rs7463805	0.142992	1.39596	0.918413	-2.59308	2.87907	1.15372	0.0747891	17.7977
		rs7505177	0.858567	1.7508	0.623861	-2.57301	4.29014	2.35978	0.0763059	72.9767
		rs7584842	0.0279878	1.5091	0.985203	-2.92986	2.98583	1.02838	0.0534047	19.803
		rs7594598	2.72535	1.91795	0.155325	-1.03383	6.48453	15.2618	0.355642	654.932
		rs7638383	1.05394	1.70979	0.537621	-2.29725	4.40514	2.86894	0.100535	81.8704
		rs7810390	-0.0685802	1.68676	0.967569	-3.37463	3.23747	0.933719	0.0342306	25.4693
		rs7843149	1.48474	1.88129	0.429988	-2.20259	5.17206	4.4138	0.110517	176.278
		rs8006663	-4.68641	1.61039	0.00361308	-7.84278	-1.53004	0.0092197	0.000392574	0.216527
		rs8021242	0.0575035	1.53845	0.970184	-2.95786	3.07287	1.05919	0.0519299	21.6038
		rs8110890	2.50967	1.65422	0.129233	-0.732596	5.75193	12.3008	0.48066	314.797
		rs875184	-1.90087	1.84797	0.303657	-5.52289	1.72116	0.149439	0.00399429	5.59099
		rs875283	-4.68428	1.73921	0.00707404	-8.09313	-1.27543	0.00923939	0.000305632	0.279311
		rs881562	1.7051	1.69927	0.315655	-1.62548	5.03567	5.50191	0.196817	153.803
		rs893922	5.47167	1.78155	0.00213138	1.97982	8.96351	237.856	7.24143	7812.76
		rs915281	1.53886	1.81424	0.396321	-2.01705	5.09477	4.65927	0.133047	163.167
		rs928963	-1.64629	1.79569	0.359245	-5.16584	1.87325	0.192763	0.00570828	6.50943
		rs9315440	-0.650021	1.60249	0.685014	-3.79091	2.49087	0.522035	0.0225751	12.0717
		rs9330454	-0.436376	1.17486	0.710319	-2.7391	1.86635	0.646375	0.0646285	6.46464
		rs937382	1.30215	1.63882	0.426865	-1.90993	4.51424	3.6772	0.14809	91.308
		rs938040	-1.91223	1.66576	0.250983	-5.17711	1.35265	0.147751	0.00564428	3.86767
		rs9464137	-2.24181	1.80893	0.215234	-5.78733	1.3037	0.106265	0.00306617	3.68288
		rs9511152	-0.198071	1.48467	0.893868	-3.10802	2.71187	0.820312	0.0446895	15.0575
		rs9517869	1.89713	1.7143	0.268446	-1.4629	5.25716	6.66674	0.231563	191.936
		rs9523030	3.84863	1.83667	0.0361321	0.248755	7.4485	46.9286	1.28243	1717.29
		rs9541214	2.89357	1.83263	0.114356	-0.69839	6.48553	18.0577	0.497385	655.588
		rs9543391	-0.331473	1.95582	0.865419	-4.16488	3.50193	0.717865	0.0155316	33.1795
		rs9610322	1.02583	1.72703	0.552523	-2.35914	4.4108	2.7894	0.094501	82.335
		rs9646527	3.0982	1.90865	0.104538	-0.642754	6.83915	22.158	0.525842	933.699
		rs9649963	-0.913341	1.85579	0.622607	-4.55068	2.724	0.401181	0.01056	15.2411
		rs972459	0.0167628	1.49508	0.991054	-2.91359	2.94711	1.0169	0.0542807	19.0509
		rs9989564	1.34206	1.75655	0.444849	-2.10079	4.78491	3.82693	0.12236	119.69
		All - Inverse variance weighted	-0.126914	0.172797	0.462663	-0.465595	0.211767	0.88081	0.627762	1.23586
		All - MR Egger	-0.128061	0.919714	0.889439	-1.9307	1.67458	0.8798	0.145047	5.33654
	Tyrosine	SNP	b	se	p	lo_ci	up_ci	or	or_lci95	or_uci95
		rs10025494	-0.0713016	0.369547	0.847003	-0.795613	0.65301	0.931181	0.451304	1.92132
		rs10493013	0.0647701	0.497586	0.896433	-0.910498	1.04004	1.06691	0.402324	2.82933
		rs11024636	-0.00976166	0.366834	0.97877	-0.728755	0.709232	0.990286	0.482509	2.03243
		rs111478839	1.01343	0.871558	0.244918	-0.694823	2.72169	2.75504	0.499163	15.2059
		rs11263465	0.17076	0.407451	0.675148	-0.627844	0.969365	1.18621	0.533741	2.63627
		rs1126671	-0.114808	0.198241	0.562497	-0.50336	0.273743	0.891537	0.604496	1.31488
		rs112811496	-0.0205291	0.245187	0.933272	-0.501095	0.460037	0.97968	0.605867	1.58413
		rs115281911	0.15768	0.433398	0.715991	-0.691781	1.00714	1.17079	0.500684	2.73776
		rs116862171	0.283996	0.284271	0.31778	-0.273176	0.841167	1.32843	0.760959	2.31907
		rs117975574	-0.102777	0.350338	0.769244	-0.78944	0.583886	0.902329	0.454099	1.79299
		rs12206654	0.048112	0.0646054	0.456449	-0.0785146	0.174739	1.04929	0.924489	1.19093
		rs12435428	0.285822	0.336972	0.396322	-0.374642	0.946287	1.33086	0.687535	2.57613
		rs1248666	-0.004854	0.371001	0.989561	-0.732015	0.722307	0.995158	0.480939	2.05918
		rs12811045	0.329001	0.397512	0.407869	-0.450124	1.10813	1.38958	0.637549	3.02868
		rs13135092	-0.50076	0.743588	0.500669	-1.95819	0.956672	0.60607	0.141113	2.60302
		rs1345901	0.144178	0.39998	0.718501	-0.639783	0.92814	1.15509	0.527407	2.5298
		rs141731602	0.530536	0.680716	0.435756	-0.803667	1.86474	1.69984	0.447684	6.45425
		rs1426962	-0.133152	0.442472	0.763469	-1.0004	0.734093	0.875332	0.367733	2.08359
		rs143205225	-0.406359	0.305684	0.183736	-1.0055	0.192783	0.666071	0.365862	1.21262
		rs1433210	-0.31259	0.321381	0.330728	-0.942496	0.317316	0.73155	0.389654	1.37344
		rs1447449	-0.877862	0.398768	0.0277053	-1.65945	-0.0962763	0.415671	0.190244	0.908213
		rs145989179	-0.55256	0.324866	0.0889638	-1.1893	0.0841763	0.575474	0.304435	1.08782
		rs148165862	-1.20135	0.401447	0.00276657	-1.98819	-0.414514	0.300788	0.136944	0.660661
		rs1550335	-0.230576	0.339678	0.497261	-0.896345	0.435194	0.794076	0.408058	1.54526
		rs1626109	0.555064	0.409062	0.174806	-0.246696	1.35683	1.74205	0.781378	3.88384
		rs1660613	0.69485	0.398725	0.0813891	-0.0866499	1.47635	2.00341	0.916998	4.37694
		rs17050272	-0.283314	0.333301	0.395312	-0.936585	0.369957	0.753283	0.391964	1.44767
		rs17232826	0.259786	0.414969	0.531291	-0.553554	1.07313	1.29665	0.574903	2.92451
		rs174547	0.383471	0.220958	0.0826535	-0.0496066	0.81655	1.46737	0.951604	2.26268
		rs17690703	-0.761667	0.543834	0.161349	-1.82758	0.304248	0.466887	0.160802	1.35561
		rs17817288	0.210142	0.338213	0.534382	-0.452756	0.87304	1.23385	0.635873	2.39418
		rs1800961	-0.167851	0.243413	0.490462	-0.644939	0.309238	0.84548	0.524694	1.36239
		rs1861179	0.323583	0.391551	0.40857	-0.443857	1.09102	1.38207	0.641557	2.97732
		rs194749	-0.454902	0.309553	0.141685	-1.06163	0.151821	0.63451	0.345893	1.16395
		rs2053701	0.988053	0.419407	0.0184813	0.166015	1.81009	2.686	1.18059	6.11101
		rs2168101	0.178877	0.248091	0.470901	-0.307381	0.665134	1.19587	0.73537	1.94475
		rs2230681	0.229576	0.214565	0.284638	-0.190972	0.650123	1.25807	0.826156	1.91578
		rs2424641	0.310759	0.405583	0.443556	-0.484183	1.1057	1.36446	0.6162	3.02134
		rs2434068	-0.66786	0.428708	0.11927	-1.50813	0.172408	0.512805	0.221324	1.18816
		rs2638315	-0.102471	0.142075	0.470757	-0.380938	0.175996	0.902604	0.68322	1.19243
		rs2729363	-0.880353	0.399186	0.0274281	-1.66276	-0.0979487	0.414636	0.189615	0.906695
		rs28601761	-0.0615254	0.199873	0.758217	-0.453276	0.330225	0.940329	0.635543	1.39128
		rs28733806	1.21162	0.322392	0.000171118	0.579735	1.84351	3.35893	1.78557	6.31868
		rs330095	-0.5196	0.371534	0.161955	-1.24781	0.208606	0.594759	0.287134	1.23196
		rs34894639	0.095296	0.246411	0.698951	-0.387669	0.578261	1.09998	0.678637	1.78294
		rs35207259	0.162991	0.281393	0.562435	-0.388539	0.71452	1.17703	0.678047	2.04321
		rs35614968	0.0236497	0.144767	0.870232	-0.260094	0.307393	1.02393	0.770979	1.35988
		rs36055409	0.185463	0.337204	0.582319	-0.475458	0.846383	1.20378	0.6216	2.3312
		rs3747207	-0.304539	0.300297	0.310522	-0.893121	0.284043	0.737463	0.409376	1.32849
		rs3799350	1.12338	0.386456	0.00365057	0.365926	1.88083	3.07523	1.44185	6.55896
		rs4149056	0.134999	0.154149	0.381156	-0.167133	0.437131	1.14454	0.846087	1.54826
		rs4665972	-0.749499	0.331859	0.0239152	-1.39994	-0.099056	0.472603	0.246611	0.905692
		rs55747707	-0.0662896	0.402738	0.869261	-0.855657	0.723077	0.93586	0.425004	2.06077
		rs56236906	0.707891	0.496372	0.153831	-0.264997	1.68078	2.02971	0.767208	5.36974
		rs56291006	0.173412	0.361287	0.631239	-0.53471	0.881533	1.18936	0.585839	2.4146
		rs58158339	-0.0316857	0.365274	0.930874	-0.747622	0.684251	0.968811	0.473491	1.98229
		rs6129629	0.0746712	0.368543	0.839438	-0.647672	0.797015	1.07753	0.523262	2.21891
		rs61676179	0.178695	0.239547	0.455685	-0.290817	0.648206	1.19566	0.747653	1.91211
		rs61926203	0.933208	0.522944	0.0743376	-0.0917609	1.95818	2.54265	0.912323	7.0864
		rs62106258	1.07234	0.558521	0.0548626	-0.0223616	2.16704	2.92221	0.977887	8.7324
		rs635634	0.222149	0.360434	0.537672	-0.484302	0.9286	1.24876	0.616127	2.53096
		rs6575900	-0.225915	0.265504	0.394828	-0.746302	0.294472	0.797786	0.474116	1.34242
		rs67549392	-0.268319	0.396496	0.498579	-1.04545	0.508812	0.764664	0.351533	1.66331
		rs6868618	-0.00464868	0.296094	0.987474	-0.584993	0.575696	0.995362	0.55711	1.77837
		rs7005453	-0.0279039	0.369118	0.93974	-0.751374	0.695567	0.972482	0.471718	2.00484
		rs7019778	-0.652681	0.296777	0.0278614	-1.23436	-0.0709988	0.520648	0.29102	0.931463
		rs7034933	-0.136454	0.36869	0.711305	-0.859086	0.586179	0.872447	0.423549	1.79711
		rs715	-0.344922	0.26189	0.187821	-0.858227	0.168382	0.708275	0.423913	1.18339
		rs7209951	-0.211956	0.254995	0.405851	-0.711748	0.287835	0.809	0.490786	1.33354
		rs73198247	0.0227802	0.377502	0.951881	-0.717124	0.762685	1.02304	0.488154	2.14402
		rs740122	-0.0587208	0.271177	0.828566	-0.590227	0.472786	0.94297	0.554201	1.60446
		rs74950025	0.553959	0.448568	0.216849	-0.325233	1.43315	1.74013	0.722359	4.19189
		rs753381	0.191184	0.38122	0.616016	-0.556008	0.938375	1.21068	0.573494	2.55583
		rs75460349	0.290686	0.310382	0.348994	-0.317663	0.899034	1.33734	0.727848	2.45723
		rs75661418	-0.283956	0.379608	0.454445	-1.02799	0.460075	0.752799	0.357726	1.58419
		rs7570775	-0.120752	0.403476	0.764727	-0.911565	0.670061	0.886254	0.401895	1.95436
		rs76089176	-0.49718	0.386375	0.198171	-1.25447	0.260115	0.608244	0.285226	1.29708
		rs7624902	0.21	0.384051	0.584515	-0.54274	0.96274	1.23368	0.581153	2.61886
		rs7786102	-0.279116	0.304651	0.359572	-0.876233	0.318001	0.756452	0.416348	1.37438
		rs78787298	0.585067	0.362864	0.106884	-0.126146	1.29628	1.79511	0.881486	3.65567
		rs79020793	-0.240785	0.17772	0.175465	-0.589117	0.107547	0.786011	0.554817	1.11354
		rs79687284	0.486578	0.544959	0.371926	-0.581541	1.5547	1.62674	0.559036	4.73365
		rs7979473	0.161173	0.121585	0.184971	-0.0771329	0.399479	1.17489	0.925767	1.49105
		rs8081539	0.4801	0.417914	0.250638	-0.339011	1.29921	1.61624	0.712475	3.6664
		rs8100204	-0.00882035	0.366626	0.980806	-0.727408	0.709767	0.991218	0.48316	2.03352
		rs9311400	-0.527869	0.39381	0.18011	-1.29974	0.243998	0.58986	0.272604	1.27634
		rs951506	-0.911133	0.427925	0.0332388	-1.74987	-0.0723994	0.402069	0.173797	0.930159
		rs987951	-0.0519249	0.403893	0.897705	-0.843554	0.739704	0.9494	0.430179	2.09532
		rs9892018	-0.242536	0.422272	0.565724	-1.07019	0.585117	0.784635	0.342943	1.7952
		rs9940990	0.013299	0.155621	0.931898	-0.291717	0.318315	1.01339	0.74698	1.37481
		All - Inverse variance weighted	0.00942622	0.0340775	0.782079	-0.0573657	0.0762181	1.00947	0.944249	1.0792
		All - MR Egger	0.0517969	0.0635406	0.417171	-0.0727427	0.176336	1.05316	0.92984	1.19284
	Phenylalanine	SNP	b	se	p	lo_ci	up_ci	or	or_lci95	or_uci95
		rs10417567	0.0465928	0.346459	0.893021	-0.632467	0.725652	1.0477	0.53128	2.06608
		rs10823138	-0.084916	0.258727	0.742755	-0.59202	0.422189	0.918589	0.553208	1.5253
		rs11075987	0.0229698	0.354482	0.948334	-0.671814	0.717754	1.02324	0.510781	2.04982
		rs112098771	-0.597197	0.416671	0.151784	-1.41387	0.219478	0.550352	0.2432	1.24543
		rs115634543	0.097734	0.494455	0.843311	-0.871398	1.06687	1.10267	0.418366	2.90626
		rs11609235	0.4808	0.399495	0.228775	-0.30221	1.26381	1.61737	0.739183	3.53888
		rs12933650	0.0389518	0.413661	0.924979	-0.771824	0.849727	1.03972	0.462169	2.33901
		rs1498694	0.013017	0.0689262	0.850207	-0.122078	0.148112	1.0131	0.885079	1.15964
		rs16921251	0.0829862	0.543318	0.878604	-0.981917	1.14789	1.08653	0.374592	3.15153
		rs17151796	-1.2849	0.416368	0.0020289	-2.10098	-0.468817	0.276679	0.122336	0.625742
		rs17253619	0.00436398	0.17737	0.980371	-0.343281	0.352009	1.00437	0.709439	1.42192
		rs17373598	-0.214263	0.390277	0.583004	-0.979206	0.55068	0.807136	0.375609	1.73443
		rs17536700	-0.862695	0.550148	0.116854	-1.94099	0.215595	0.422023	0.143562	1.2406
		rs2180314	0.0732931	0.323201	0.820601	-0.560182	0.706768	1.07605	0.571105	2.02743
		rs2978487	0.372787	0.35739	0.296911	-0.327697	1.07327	1.45177	0.720581	2.92493
		rs35244631	0.161679	0.377826	0.668711	-0.578861	0.902218	1.17548	0.560536	2.46507
		rs35995393	0.365033	0.384716	0.342703	-0.38901	1.11908	1.44056	0.677727	3.06202
		rs4236903	-0.0720178	0.349311	0.836658	-0.756668	0.612633	0.930514	0.469227	1.84528
		rs4781730	-0.426451	0.302572	0.158711	-1.01949	0.166591	0.652822	0.360778	1.18127
		rs487423	0.980387	0.419456	0.0194244	0.158254	1.80252	2.66549	1.17146	6.06491
		rs641154	0.340795	0.401365	0.395832	-0.44588	1.12747	1.40606	0.64026	3.08783
		rs6458399	-0.00721664	0.38381	0.984999	-0.759484	0.745051	0.992809	0.467908	2.10655
		rs6480462	0.262642	0.333659	0.43119	-0.391329	0.916613	1.30036	0.676157	2.5008
		rs6964674	0.228875	0.438031	0.601316	-0.629665	1.08741	1.25718	0.53277	2.9666
		rs715	-0.375409	0.285037	0.187821	-0.934082	0.183264	0.687008	0.392946	1.20113
		rs72878921	0.644692	0.405306	0.111693	-0.149708	1.43909	1.9054	0.86096	4.21686
		rs73079476	0.237151	0.308311	0.441779	-0.367139	0.841441	1.26763	0.692713	2.31971
		rs7312381	0.18619	0.36082	0.605842	-0.521018	0.893397	1.20465	0.593916	2.44342
		rs75627186	0.835834	0.501845	0.0958084	-0.147782	1.81945	2.30674	0.86262	6.16847
		rs76358507	0.572383	0.439975	0.193277	-0.289968	1.43473	1.77249	0.748288	4.19852
		rs788460	-0.333605	0.478274	0.485478	-1.27102	0.603813	0.716336	0.280544	1.82908
		rs79020793	-0.455648	0.336308	0.175465	-1.11481	0.203517	0.634037	0.327977	1.22571
		rs79286417	0.878872	0.643378	0.171931	-0.38215	2.13989	2.40818	0.682393	8.49853
		rs7951832	-0.0872469	0.327918	0.790191	-0.729967	0.555473	0.916451	0.481925	1.74277
		rs7969789	0.0278326	0.144871	0.847649	-0.256115	0.311781	1.02822	0.774053	1.36586
		rs7980492	0.194675	0.317287	0.539504	-0.427207	0.816558	1.21492	0.652329	2.2627
		rs80258332	-0.509496	0.349285	0.144652	-1.19409	0.175102	0.600798	0.302978	1.19137
		rs9317013	-0.177215	0.404587	0.661375	-0.970206	0.615775	0.837599	0.379005	1.85109
		rs9467618	-0.740221	0.292188	0.0112971	-1.31291	-0.167533	0.477009	0.269036	0.845749
		rs9523601	0.67764	0.354961	0.056255	-0.0180835	1.37336	1.96923	0.982079	3.94861
		All - Inverse variance weighted	0.00749064	0.0497151	0.880235	-0.089951	0.104932	1.00752	0.913976	1.11064
		All - MR Egger	-0.0423926	0.0923337	0.648761	-0.223367	0.138581	0.958493	0.799822	1.14864
	Glutamate	SNP	b	se	p	lo_ci	up_ci	or	or_lci95	or_uci95
		rs10879778	-1.36813	0.415483	0.000991753	-2.18247	-0.55378	0.254583	0.112762	0.574773
		rs2037458	0.15778	0.424462	0.710104	-0.674166	0.989726	1.17091	0.509581	2.6905
		rs4149121	0.847854	0.472354	0.0726607	-0.077959	1.77367	2.33463	0.925002	5.89243
		rs992534	-0.276516	0.475129	0.56058	-1.20777	0.654738	0.758422	0.298863	1.92464
		All - Inverse variance weighted	-0.220909	0.472275	0.63996	-1.14657	0.704751	0.80179	0.317725	2.02334
		All - MR Egger	-4.48422	6.60582	0.567266	-17.4316	8.46319	0.0112857	2.68867e-08	4737.17
	Glycine	SNP	b	se	p	lo_ci	up_ci	or	or_lci95	or_uci95
		rs10190808	-0.0825087	0.278392	0.766943	-0.628157	0.46314	0.920803	0.533574	1.58906
		rs1047891	0.0215411	0.0147848	0.145124	-0.00743717	0.0505194	1.02177	0.99259	1.05182
		rs10934753	-0.045199	0.109089	0.678633	-0.259014	0.168616	0.955807	0.771812	1.18367
		rs11098665	0.0512235	0.382091	0.893354	-0.697675	0.800122	1.05256	0.497741	2.22581
		rs11130192	-0.162244	0.321691	0.614018	-0.792758	0.468271	0.850234	0.452595	1.59723
		rs111504781	0.23147	0.275445	0.400712	-0.308402	0.771343	1.26045	0.73462	2.16267
		rs112247225	-0.0183581	0.0991047	0.853042	-0.212603	0.175887	0.981809	0.808477	1.1923
		rs11242109	-0.462535	0.344588	0.179504	-1.13793	0.212858	0.629685	0.320482	1.23721
		rs114394242	-1.426	0.764477	0.0621348	-2.92438	0.0723711	0.240267	0.053698	1.07505
		rs11666281	-0.33671	0.226802	0.13765	-0.781241	0.107822	0.714116	0.457837	1.11385
		rs117249010	1.0513	0.992857	0.289664	-0.894705	2.9973	2.86136	0.408728	20.0313
		rs118057622	0.821116	0.550569	0.135858	-0.257999	1.90023	2.27304	0.772596	6.68744
		rs12005290	-0.502326	0.414155	0.225171	-1.31407	0.309418	0.605122	0.268724	1.36263
		rs1209623	-0.114491	0.485651	0.813628	-1.06637	0.837385	0.89182	0.344257	2.31032
		rs12307895	-0.532281	0.232954	0.0223177	-0.988871	-0.0756906	0.587264	0.371996	0.927103
		rs1243473	0.244925	0.545033	0.65316	-0.82334	1.31319	1.27753	0.438963	3.71802
		rs12566232	0.19463	0.379657	0.608198	-0.549497	0.938757	1.21486	0.57724	2.5568
		rs12573237	-0.0861792	0.432074	0.841907	-0.933044	0.760686	0.91743	0.393354	2.13974
		rs12811045	-0.351261	0.424409	0.407869	-1.1831	0.480579	0.7038	0.306327	1.61701
		rs13107325	-0.199496	0.644635	0.756963	-1.46298	1.06399	0.819143	0.231545	2.8979
		rs140695755	0.950521	0.503518	0.0590583	-0.0363747	1.93742	2.58706	0.964279	6.9408
		rs144132875	-0.31528	0.520867	0.544981	-1.33618	0.705619	0.729585	0.262848	2.0251
		rs145678014	-1.05304	0.528375	0.0462639	-2.08866	-0.0174244	0.348876	0.123854	0.982726
		rs147504633	0.297241	0.39294	0.449378	-0.472922	1.0674	1.34614	0.623179	2.90782
		rs149181595	0.898246	0.532485	0.0916234	-0.145424	1.94192	2.45529	0.864656	6.97209
		rs17036342	0.227075	0.293719	0.439462	-0.348615	0.802764	1.25492	0.705665	2.2317
		rs17114722	-0.0835662	0.391488	0.83097	-0.850884	0.683751	0.91983	0.427037	1.9813
		rs17442300	-0.544971	0.347874	0.117214	-1.2268	0.136863	0.579859	0.293228	1.14667
		rs1801133	0.435551	0.374626	0.244979	-0.298715	1.16982	1.54582	0.741771	3.2214
		rs192322963	0.00496831	0.601035	0.993405	-1.17306	1.183	1.00498	0.309418	3.26414
		rs1936789	-0.0574535	0.410355	0.888653	-0.861749	0.746842	0.944166	0.422423	2.11032
		rs1965869	0.452858	0.329127	0.168841	-0.192231	1.09795	1.5728	0.825116	2.998
		rs2009509	-0.353001	0.391311	0.367005	-1.11997	0.413969	0.702577	0.326289	1.51281
		rs2026972	0.142091	0.0995838	0.153624	-0.0530933	0.337275	1.15268	0.948292	1.40112
		rs2123003	0.089603	0.378921	0.813069	-0.653083	0.832289	1.09374	0.520439	2.29857
		rs2133899	1.61958	0.490137	0.000951999	0.658911	2.58025	5.05097	1.93269	13.2004
		rs2168101	0.188764	0.261803	0.470901	-0.324371	0.701898	1.20776	0.722982	2.01758
		rs2246199	-0.0263431	0.649403	0.967643	-1.29917	1.24649	0.974001	0.272757	3.4781
		rs2608913	-0.383542	0.333047	0.249479	-1.03631	0.26923	0.681443	0.35476	1.30896
		rs2657879	-0.140357	0.20003	0.482878	-0.532417	0.251702	0.869047	0.587184	1.28621
		rs2711697	-0.323432	0.308247	0.294057	-0.927595	0.280732	0.723661	0.395504	1.3241
		rs28435239	0.323183	0.283352	0.254049	-0.232188	0.878553	1.38152	0.792797	2.40741
		rs28601761	0.0378967	0.123112	0.758217	-0.203403	0.279196	1.03862	0.81595	1.32207
		rs2967	-0.780066	0.489606	0.111103	-1.73969	0.179561	0.458376	0.175574	1.19669
		rs2972154	0.0807962	0.332763	0.808157	-0.571419	0.733011	1.08415	0.564724	2.08134
		rs34439264	-0.228092	0.330808	0.490509	-0.876477	0.420292	0.796051	0.416247	1.52241
		rs34453616	-0.861087	0.426715	0.0435971	-1.69745	-0.0247254	0.422702	0.18315	0.975578
		rs34505073	0.237841	0.425247	0.575956	-0.595643	1.07133	1.26851	0.551208	2.91925
		rs34536774	0.646254	0.340732	0.0578723	-0.0215807	1.31409	1.90838	0.978651	3.72136
		rs34656869	-0.740599	0.455647	0.104082	-1.63367	0.152469	0.476828	0.195213	1.16471
		rs34945403	-0.0741834	0.294208	0.800928	-0.650832	0.502465	0.928501	0.521612	1.65279
		rs35484034	-0.637047	0.332196	0.055151	-1.28815	0.014057	0.528852	0.27578	1.01416
		rs35626482	0.172464	0.494029	0.727016	-0.795833	1.14076	1.18823	0.451205	3.12915
		rs36105243	0.0282012	0.304922	0.926311	-0.569446	0.625849	1.0286	0.565839	1.86983
		rs3736951	-0.0920159	0.340097	0.786731	-0.758607	0.574575	0.912091	0.468319	1.77638
		rs3782860	0.0562384	0.283713	0.84287	-0.499838	0.612315	1.05785	0.606629	1.8447
		rs3936511	0.137042	0.424109	0.746597	-0.694212	0.968297	1.14688	0.499468	2.63346
		rs4240624	-0.0634337	0.0829104	0.44422	-0.225938	0.0990708	0.938536	0.797767	1.10414
		rs4254836	-0.0916655	0.381984	0.810352	-0.840354	0.657023	0.91241	0.431558	1.92904
		rs4493564	0.103703	0.409083	0.799881	-0.6981	0.905507	1.10927	0.49753	2.47318
		rs45446698	0.479396	0.366124	0.190405	-0.238207	1.197	1.6151	0.78804	3.31017
		rs489009	-0.154814	0.452553	0.732284	-1.04182	0.73219	0.856575	0.352813	2.07963
		rs4948102	-0.0832114	0.131859	0.527998	-0.341654	0.175231	0.920157	0.710594	1.19152
		rs499600	-0.104013	0.372131	0.779855	-0.833389	0.625363	0.901213	0.434574	1.86892
		rs555754	0.0823905	0.317723	0.795392	-0.540346	0.705127	1.08588	0.582547	2.0241
		rs55727466	-0.174196	0.409354	0.670445	-0.97653	0.628139	0.840132	0.376616	1.87412
		rs56113850	0.14303	0.346796	0.680023	-0.536691	0.82275	1.15376	0.58468	2.27675
		rs561931	-0.154084	0.261284	0.555379	-0.6662	0.358032	0.8572	0.513657	1.43051
		rs56311083	0.0401391	0.465783	0.931327	-0.872796	0.953074	1.04096	0.417782	2.59367
		rs59668107	-0.418458	0.453103	0.355726	-1.30654	0.469623	0.658061	0.270756	1.59939
		rs6125987	0.0398478	0.353466	0.910241	-0.652946	0.732642	1.04065	0.52051	2.08057
		rs61789561	-0.590198	0.428591	0.168492	-1.43024	0.249841	0.554217	0.239252	1.28382
		rs62073965	0.092336	0.186422	0.620384	-0.273051	0.457723	1.09673	0.761054	1.58047
		rs62203720	-0.0188027	0.280816	0.946616	-0.569203	0.531597	0.981373	0.565977	1.70165
		rs62357251	-0.0526304	0.615758	0.931886	-1.25952	1.15426	0.948731	0.283791	3.17166
		rs6449313	-1.07064	0.463016	0.0207605	-1.97815	-0.163126	0.34279	0.138325	0.849484
		rs6601302	-0.361259	0.30342	0.233802	-0.955962	0.233444	0.696799	0.384442	1.26294
		rs6879874	-0.133137	0.372181	0.720553	-0.862612	0.596339	0.875345	0.422058	1.81546
		rs6963105	-0.784251	0.399382	0.0495696	-1.56704	-0.00146138	0.456462	0.208662	0.99854
		rs7078003	-0.25253	0.364866	0.488864	-0.967666	0.462607	0.776833	0.379969	1.58821
		rs7120967	0.530873	0.876256	0.544619	-1.18659	2.24833	1.70042	0.305261	9.47195
		rs7188156	0.378222	0.30929	0.221379	-0.227987	0.984431	1.45969	0.796135	2.67629
		rs7252042	-0.0520164	0.406968	0.898296	-0.849674	0.745641	0.949313	0.427554	2.10779
		rs72675794	-0.23273	0.42484	0.583825	-1.06542	0.599956	0.792368	0.344585	1.82204
		rs72760801	0.311057	0.454227	0.493467	-0.579228	1.20134	1.36487	0.560331	3.32458
		rs72776460	-0.00602829	0.30999	0.984485	-0.613609	0.601552	0.99399	0.541393	1.82495
		rs72805967	0.21533	0.373021	0.563764	-0.515791	0.946452	1.24027	0.597028	2.57655
		rs75604103	0.107814	0.114044	0.344469	-0.115712	0.33134	1.11384	0.890732	1.39283
		rs76013262	-0.418193	0.268655	0.119562	-0.944757	0.108372	0.658235	0.388774	1.11446
		rs76796332	-1.28647	0.838522	0.124978	-2.92997	0.357034	0.276244	0.0533985	1.42908
		rs7704653	-0.150498	0.273701	0.582413	-0.686951	0.385955	0.860279	0.503108	1.47102
		rs77515689	-0.217751	0.355307	0.539973	-0.914152	0.47865	0.804326	0.400856	1.61389
		rs7828769	-0.553261	0.451337	0.220265	-1.43788	0.331361	0.575072	0.23743	1.39286
		rs78303916	0.430018	0.461461	0.351407	-0.474445	1.33448	1.53729	0.62223	3.79803
		rs78312207	0.489299	0.369028	0.184869	-0.233997	1.21259	1.63117	0.791364	3.3622
		rs79325880	0.181866	0.167894	0.278711	-0.147206	0.510938	1.19945	0.863116	1.66685
		rs79687284	0.376003	0.421116	0.371926	-0.449385	1.20139	1.45645	0.63802	3.32474
		rs8127409	-0.146052	0.422558	0.729615	-0.974265	0.682161	0.864113	0.37747	1.97815
		rs9636331	0.233068	0.177447	0.189031	-0.114728	0.580865	1.26247	0.891608	1.78758
		rs9922910	0.0810638	0.087073	0.35186	-0.0895993	0.251727	1.08444	0.914297	1.28624
		All - Inverse variance weighted	0.0140502	0.0135867	0.301085	-0.0125798	0.0406802	1.01415	0.987499	1.04152
		All - MR Egger	0.0297703	0.0157271	0.061318	-0.00105484	0.0605955	1.03022	0.998946	1.06247
	propionic acid	SNP	b	se	p	lo_ci	up_ci	or	or_lci95	or_uci95
		rs11086551	0.00619065	0.0768731	0.935815	-0.144481	0.156862	1.00621	0.865472	1.16983
		rs11222629	-0.117556	0.0813643	0.148511	-0.27703	0.0419181	0.889091	0.758032	1.04281
		rs11656534	-0.0439981	0.0735288	0.549588	-0.188115	0.100118	0.956956	0.82852	1.1053
		rs118130185	0.087379	0.0776962	0.260748	-0.0649055	0.239664	1.09131	0.937156	1.27082
		rs12680053	0.0474653	0.0992119	0.632349	-0.14699	0.241921	1.04861	0.863303	1.27369
		rs12891984	0.117868	0.0951227	0.215302	-0.0685724	0.304309	1.1251	0.933726	1.35569
		rs13208940	0.0647834	0.10454	0.535454	-0.140114	0.269681	1.06693	0.869259	1.30955
		rs17595094	0.204497	0.107133	0.0562863	-0.00548388	0.414479	1.22691	0.994531	1.51358
		rs2027038	-0.0555028	0.086686	0.521995	-0.225407	0.114402	0.946009	0.798191	1.1212
		rs2281391	0.0576157	0.0863023	0.504387	-0.111537	0.226768	1.05931	0.894459	1.25454
		rs4676410	-0.157401	0.0855251	0.065709	-0.32503	0.0102285	0.854362	0.722506	1.01028
		rs4756895	-0.0353058	0.0854735	0.679561	-0.202834	0.132222	0.96531	0.816414	1.14136
		rs4789403	-0.14105	0.0924309	0.127008	-0.322215	0.0401142	0.868446	0.724542	1.04093
		rs563487	0.0880296	0.0814474	0.279779	-0.0716073	0.247666	1.09202	0.930896	1.28103
		rs6737854	-0.179844	0.0900315	0.045764	-0.356306	-0.00338187	0.835401	0.700259	0.996624
		rs7306365	-0.00616308	0.0916068	0.946361	-0.185712	0.173386	0.993856	0.830512	1.18933
		rs73862615	0.000495165	0.0927195	0.995739	-0.181235	0.182225	1.0005	0.834239	1.19988
		rs75561980	-0.00256991	0.111463	0.981606	-0.221038	0.215898	0.997433	0.801686	1.24098
		rs76312928	0.236864	0.094468	0.012164	0.0517072	0.422022	1.26727	1.05307	1.52504
		rs76668889	0.00113535	0.07841	0.988447	-0.152548	0.154819	1.00114	0.858517	1.16745
		rs76808847	0.0324502	0.0902751	0.719252	-0.144489	0.209389	1.03298	0.865465	1.23292
		rs9360322	0.186562	0.0851913	0.0285303	0.0195869	0.353537	1.2051	1.01978	1.4241
		All - Inverse variance weighted	0.012416	0.0232114	0.592713	-0.0330784	0.0579103	1.01249	0.967463	1.05962
		All - MR Egger	0.0858452	0.0603167	0.17008	-0.0323756	0.204066	1.08964	0.968143	1.22638
	Trimethylamino oxide（TMAO）	SNP	b	se	p	lo_ci	up_ci	or	or_lci95	or_uci95
		rs10433885	-0.0131	0.0275095	0.633934	-0.0670186	0.0408187	0.986985	0.935178	1.04166
		rs115977728	-0.0273635	0.0468914	0.559523	-0.119271	0.0645437	0.973007	0.887567	1.06667
		rs12938132	-0.0162237	0.0577769	0.778864	-0.129466	0.097019	0.983907	0.878564	1.10188
		rs144875854	0.0765403	0.0500991	0.126568	-0.021654	0.174735	1.07955	0.978579	1.19093
		rs150614911	0.0317966	0.0481107	0.508674	-0.0625004	0.126094	1.03231	0.939413	1.13439
		rs17198295	-0.0240089	0.0277912	0.387641	-0.0784795	0.0304618	0.976277	0.924521	1.03093
		rs187795813	0.0138332	0.0560718	0.805136	-0.0960675	0.123734	1.01393	0.908403	1.13171
		rs2714372	0.0440831	0.0485512	0.363894	-0.0510773	0.139243	1.04507	0.950205	1.1494
		rs2806545	0.0126964	0.047345	0.788571	-0.0800998	0.105493	1.01278	0.923024	1.11126
		rs35575634	0.0143542	0.0514517	0.780257	-0.0864912	0.1152	1.01446	0.917144	1.1221
		rs4743557	0.0399581	0.0442657	0.366692	-0.0468027	0.126719	1.04077	0.954276	1.1351
		rs483366	0.0081845	0.0505248	0.871314	-0.0908441	0.107213	1.00822	0.91316	1.11317
		rs55836408	-0.0163944	0.0370312	0.657969	-0.0889756	0.0561867	0.983739	0.914868	1.0578
		rs56015442	-0.0384285	0.0355976	0.280354	-0.1082	0.0313428	0.9623	0.897448	1.03184
		rs561986009	-0.0161966	0.0346055	0.639759	-0.0840234	0.0516302	0.983934	0.91941	1.05299
		rs565523	0.0296977	0.0544604	0.585542	-0.0770448	0.13644	1.03014	0.925848	1.14619
		rs58349531	0.101927	0.103289	0.323735	-0.10052	0.304374	1.1073	0.904367	1.35578
		rs60919944	0.0595071	0.0409048	0.145732	-0.0206662	0.13968	1.06131	0.979546	1.14991
		rs73052331	-0.0173146	0.0636159	0.785488	-0.142002	0.107373	0.982834	0.86762	1.11335
		rs75051036	0.128662	0.0554195	0.020254	0.0200402	0.237285	1.13731	1.02024	1.2678
		rs8056675	-0.0238784	0.0500402	0.633231	-0.121957	0.0742005	0.976404	0.885186	1.07702
		All - Inverse variance weighted	0.00578058	0.00952458	0.543909	-0.0128876	0.0244488	1.0058	0.987195	1.02475
		All - MR Egger	-0.00674613	0.0185584	0.720238	-0.0431206	0.0296283	0.993277	0.957796	1.03007
	Serotonin (5HT)	SNP	b	se	p	lo_ci	up_ci	or	or_lci95	or_uci95
		rs10516056	0.172209	0.419086	0.681134	-0.6492	0.993619	1.18793	0.522464	2.70099
		rs10881427	0.170419	0.496233	0.731279	-0.802197	1.14303	1.1858	0.448343	3.13627
		rs10953038	0.0332945	0.414292	0.935947	-0.778718	0.845306	1.03385	0.458994	2.32869
		rs11781043	0.908299	0.407754	0.0259094	0.109102	1.7075	2.4801	1.11528	5.51514
		rs12646122	0.14392	0.251577	0.567275	-0.349172	0.637012	1.15479	0.705272	1.89082
		rs17708932	-0.284674	0.211252	0.177802	-0.698727	0.12938	0.75226	0.497218	1.13812
		rs2742351	-0.9128	0.414823	0.0277747	-1.72585	-0.0997461	0.401399	0.178021	0.905067
		rs3753556	-0.594875	0.500239	0.234368	-1.57534	0.385594	0.551631	0.206936	1.47049
		rs5764174	0.38925	0.406506	0.338289	-0.407501	1.186	1.47587	0.665311	3.27396
		rs6466265	0.368652	0.464618	0.427515	-0.542	1.2793	1.44578	0.581584	3.59414
[truncated: 3,418 more rows]

## Sheet: ST8
Supplementary table 8 Casual effects of MR Analysis between gut microbiota and headache（FDR）
Exposure (GM taxa) data source	Outcome	Level	Exposure.id	nsnp	IVW					MR Egger					Weighted median					Simple mode					Weighted mode
					p-value	FDR	OR	OR_lci95	OR_uci95	p-value	FDR	OR	OR_lci95	OR_uci95	p-value	FDR	OR	OR_lci95	OR_uci95	p-value	FDR	OR	OR_lci95	OR_uci95	p-value	FDR	OR	OR_lci95	OR_uci95
Kurilshikov et al.(MiBioGen)	Cluster headache, strict, including avohilmo（FinnGen Biobank）	phylum	1phylum.Actinobacteria.id.400	16	0.0173169	0.724193	1.64276	1.09153	2.47236	0.143355	0.967379	4.14063	0.687021	24.9553	0.0316033	0.995181	1.85203	1.0558	3.24872	0.268329	0.995167	1.87635	0.641666	5.48679	0.203447	0.995015	1.97105	0.725015	5.35855
Kurilshikov et al.(MiBioGen)	Cluster headache, strict, including avohilmo（FinnGen Biobank）	phylum	1phylum.Bacteroidetes.id.905	12	0.27265	0.840924	1.30374	0.811663	2.09415	0.938945	0.968596	0.955555	0.307297	2.97134	0.141123	0.995181	1.64283	0.84811	3.18226	0.406121	0.995167	1.61431	0.544596	4.78518	0.454489	0.995015	1.41887	0.585924	3.4359
Kurilshikov et al.(MiBioGen)	Cluster headache, strict, including avohilmo（FinnGen Biobank）	phylum	1phylum.Cyanobacteria.id.1500	10	0.525025	0.963776	0.895925	0.638406	1.25732	0.906123	0.967379	1.07456	0.337524	3.42106	0.616257	0.995181	0.891987	0.570447	1.39477	0.968149	0.995167	0.985334	0.48669	1.99487	0.926549	0.995015	0.967938	0.493452	1.89867
Kurilshikov et al.(MiBioGen)	Cluster headache, strict, including avohilmo（FinnGen Biobank）	phylum	1phylum.Euryarchaeota.id.55	11	0.924058	0.979364	1.01521	0.744282	1.38477	0.22584	0.967379	2.41979	0.63863	9.16867	0.526089	0.995181	1.12466	0.782149	1.61715	0.494435	0.995167	1.28865	0.639346	2.59736	0.421218	0.995015	1.32327	0.687655	2.54641
Kurilshikov et al.(MiBioGen)	Cluster headache, strict, including avohilmo（FinnGen Biobank）	phylum	1phylum.Firmicutes.id.1672	18	0.0579851	0.840924	1.43918	0.987749	2.09693	0.839871	0.967379	0.896532	0.316135	2.54249	0.559668	0.995181	1.17087	0.689163	1.98927	0.764446	0.995167	1.12668	0.522825	2.428	0.767998	0.995015	1.115	0.547223	2.27187
Kurilshikov et al.(MiBioGen)	Cluster headache, strict, including avohilmo（FinnGen Biobank）	phylum	1phylum.Lentisphaerae.id.2238	11	0.206573	0.840924	0.804816	0.574587	1.12729	0.198018	0.967379	2.36302	0.702679	7.94654	0.286048	0.995181	0.810728	0.551391	1.19204	0.729292	0.995167	0.885559	0.453478	1.72934	0.695046	0.995015	0.878628	0.468666	1.6472
Kurilshikov et al.(MiBioGen)	Cluster headache, strict, including avohilmo（FinnGen Biobank）	phylum	1phylum.Proteobacteria.id.2375	14	0.794645	0.976683	1.05853	0.689741	1.6245	0.184665	0.967379	2.40383	0.7087	8.15349	0.716382	0.995181	0.897423	0.500514	1.60908	0.649865	0.995167	0.801301	0.314766	2.03988	0.731705	0.995015	0.834399	0.303024	2.29758
Kurilshikov et al.(MiBioGen)	Cluster headache, strict, including avohilmo（FinnGen Biobank）	phylum	1phylum.Tenericutes.id.3919	12	0.797499	0.976683	0.951347	0.649945	1.39252	0.774331	0.967379	0.822486	0.224105	3.0186	0.663871	0.995181	0.893207	0.536708	1.4865	0.433082	0.995167	0.729313	0.340961	1.55999	0.874431	0.995015	0.941802	0.45544	1.94755
Kurilshikov et al.(MiBioGen)	Cluster headache, strict, including avohilmo（FinnGen Biobank）	phylum	1phylum.Verrucomicrobia.id.3982	12	0.798702	0.976683	0.951467	0.649142	1.39459	0.457852	0.967379	1.48608	0.543712	4.06177	0.692019	0.995181	0.900545	0.536286	1.51222	0.528018	0.995167	0.760626	0.334006	1.73216	0.572671	0.995015	0.796694	0.370294	1.7141
Kurilshikov et al.(MiBioGen)	Cluster headache, strict, including avohilmo（FinnGen Biobank）	class	2class.Actinobacteria.id.419	17	0.338531	0.866041	1.1876	0.835129	1.68882	0.185308	0.967379	2.12989	0.732482	6.19323	0.978101	0.995181	0.992926	0.598113	1.64835	0.486992	0.995167	0.701621	0.264351	1.86219	0.408596	0.995015	0.717814	0.333782	1.54369
Kurilshikov et al.(MiBioGen)	Cluster headache, strict, including avohilmo（FinnGen Biobank）	class	2class.Alphaproteobacteria.id.23	9	0.190194	0.840924	1.30444	0.876452	1.94143	0.29395	0.967379	2.40861	0.527465	10.9986	0.210306	0.995181	1.40167	0.82643	2.37729	0.517169	0.995167	1.31777	0.593159	2.92757	0.386777	0.995015	1.44831	0.65525	3.20123
Kurilshikov et al.(MiBioGen)	Cluster headache, strict, including avohilmo（FinnGen Biobank）	class	2class.Bacilli.id.1673	22	0.232347	0.840924	1.25789	0.86322	1.833	0.975322	0.977511	0.983996	0.358555	2.70042	0.735325	0.995181	1.08898	0.664326	1.78508	0.814253	0.995167	1.12844	0.417024	3.05346	0.780261	0.995015	0.882947	0.372339	2.09378
Kurilshikov et al.(MiBioGen)	Cluster headache, strict, including avohilmo（FinnGen Biobank）	class	2class.Bacteroidia.id.912	14	0.122511	0.840924	1.42585	0.908925	2.23677	0.89326	0.967379	0.924066	0.298693	2.85878	0.13643	0.995181	1.6181	0.858871	3.04847	0.348357	0.995167	1.67493	0.592562	4.73436	0.426486	0.995015	1.48625	0.577053	3.82795
Kurilshikov et al.(MiBioGen)	Cluster headache, strict, including avohilmo（FinnGen Biobank）	class	2class.Betaproteobacteria.id.286	13	0.0184743	0.724193	0.588345	0.378428	0.914706	0.653455	0.967379	1.3881	0.344754	5.589	0.20344	0.995181	0.675516	0.36905	1.23648	0.412776	0.995167	0.685998	0.287228	1.6384	0.425073	0.995015	0.701906	0.302967	1.62616
Kurilshikov et al.(MiBioGen)	Cluster headache, strict, including avohilmo（FinnGen Biobank）	class	2class.Clostridia.id.1859	15	0.739247	0.976683	1.07643	0.697651	1.66086	0.6557	0.967379	1.50124	0.262141	8.59732	0.665882	0.995181	0.879656	0.491524	1.57428	0.783426	0.995167	0.876177	0.347547	2.20887	0.759604	0.995015	0.876177	0.38195	2.00991
Kurilshikov et al.(MiBioGen)	Cluster headache, strict, including avohilmo（FinnGen Biobank）	class	2class.Coriobacteriia.id.809	17	0.676045	0.976683	1.10279	0.696922	1.74502	0.153186	0.967379	2.27676	0.779571	6.64937	0.983526	0.995181	0.993619	0.541141	1.82444	0.543123	0.995167	0.655165	0.1726	2.48692	0.611476	0.995015	0.72344	0.212577	2.462
Kurilshikov et al.(MiBioGen)	Cluster headache, strict, including avohilmo（FinnGen Biobank）	class	2class.Deltaproteobacteria.id.30	13	0.116595	0.840924	1.42738	0.9152	2.2262	0.905306	0.967379	0.878718	0.109591	7.04569	0.211588	0.995181	1.45473	0.807939	2.61929	0.12809	0.995167	2.28487	0.848288	6.15431	0.143567	0.995015	2.21146	0.818456	5.97533
Kurilshikov et al.(MiBioGen)	Cluster headache, strict, including avohilmo（FinnGen Biobank）	class	2class.Erysipelotrichia.id.2147	13	0.268543	0.840924	0.761655	0.470214	1.23373	0.574927	0.967379	1.85271	0.228885	14.9968	0.682942	0.995181	0.871508	0.450462	1.68611	0.784284	0.995167	1.16755	0.394693	3.45376	0.78316	0.995015	1.17722	0.377929	3.66695
Kurilshikov et al.(MiBioGen)	Cluster headache, strict, including avohilmo（FinnGen Biobank）	class	2class.Gammaproteobacteria.id.33	9	0.891322	0.979364	0.949643	0.452545	1.99278	0.722851	0.967379	0.604794	0.0419174	8.7261	0.573674	0.995181	0.799178	0.366016	1.74497	0.7354	0.995167	0.819716	0.269234	2.49573	0.628599	0.995015	0.766481	0.271856	2.16105
Kurilshikov et al.(MiBioGen)	Cluster headache, strict, including avohilmo（FinnGen Biobank）	class	2class.Lentisphaeria.id.2250	10	0.128169	0.840924	0.758826	0.531773	1.08282	0.292082	0.967379	2.03932	0.591074	7.03604	0.198764	0.995181	0.767909	0.513315	1.14878	0.507296	0.995167	0.803017	0.430807	1.49681	0.493763	0.995015	0.803017	0.439454	1.46736
Kurilshikov et al.(MiBioGen)	Cluster headache, strict, including avohilmo（FinnGen Biobank）	class	2class.Melainabacteria.id.1589	13	0.807136	0.976683	0.966682	0.736425	1.26893	0.141712	0.967379	0.494646	0.206919	1.18247	0.922068	0.995181	1.01752	0.718518	1.44094	0.750473	0.995167	1.10058	0.617917	1.96025	0.996992	0.996992	0.998975	0.59268	1.6838
Kurilshikov et al.(MiBioGen)	Cluster headache, strict, including avohilmo（FinnGen Biobank）	class	2class.Methanobacteria.id.119	11	0.330893	0.866041	1.12916	0.883912	1.44246	0.221258	0.967379	1.84172	0.740788	4.57881	0.475861	0.995181	1.12395	0.815159	1.54971	0.219037	0.995167	1.40155	0.846228	2.32129	0.392315	0.995015	1.28318	0.742826	2.2166
Kurilshikov et al.(MiBioGen)	Cluster headache, strict, including avohilmo（FinnGen Biobank）	class	2class.Mollicutes.id.3920	12	0.797499	0.976683	0.951347	0.649945	1.39252	0.774331	0.967379	0.822486	0.224105	3.0186	0.657285	0.995181	0.893207	0.542339	1.47107	0.462022	0.995167	0.729313	0.323859	1.64237	0.873526	0.995015	0.941802	0.457835	1.93736
Kurilshikov et al.(MiBioGen)	Cluster headache, strict, including avohilmo（FinnGen Biobank）	class	2class.Negativicutes.id.2164	13	0.0836114	0.840924	0.663485	0.416857	1.05603	0.731459	0.967379	0.744071	0.143491	3.85837	0.557345	0.995181	0.831535	0.449019	1.53991	0.914017	0.995167	0.941278	0.32105	2.75971	0.919047	0.995015	0.947829	0.344598	2.60704
Kurilshikov et al.(MiBioGen)	Cluster headache, strict, including avohilmo（FinnGen Biobank）	class	2class.Verrucomicrobiae.id.4029	12	0.888794	0.979364	1.02805	0.697586	1.51507	0.491635	0.967379	1.65441	0.415273	6.59103	0.544669	0.995181	1.17797	0.693389	2.0012	0.81739	0.995167	1.11561	0.450562	2.7623	0.608109	0.995015	1.24929	0.546653	2.85506
Kurilshikov et al.(MiBioGen)	Cluster headache, strict, including avohilmo（FinnGen Biobank）	order	3order.Actinomycetales.id.420	4	0.719893	0.976683	1.11915	0.604896	2.0706	0.840858	0.967379	1.20939	0.235872	6.20095	0.842006	0.995181	1.0636	0.580047	1.95027	0.994492	0.995167	1.00304	0.453242	2.21977	0.933584	0.995015	1.03189	0.522849	2.03655
Kurilshikov et al.(MiBioGen)	Cluster headache, strict, including avohilmo（FinnGen Biobank）	order	3order.Bacillales.id.1674	9	0.7537	0.976683	0.958122	0.733437	1.25164	0.610424	0.967379	0.726921	0.225054	2.34794	0.627515	0.995181	1.08303	0.78472	1.49474	0.660292	0.995167	1.10851	0.712142	1.72551	0.699292	0.995015	1.08936	0.716554	1.65612
Kurilshikov et al.(MiBioGen)	Cluster headache, strict, including avohilmo（FinnGen Biobank）	order	3order.Bacteroidales.id.913	14	0.122511	0.840924	1.42585	0.908925	2.23677	0.89326	0.967379	0.924066	0.298693	2.85878	0.124408	0.995181	1.6181	0.875786	2.98959	0.312984	0.995167	1.67493	0.63936	4.38784	0.406662	0.995015	1.48625	0.60086	3.67628
Kurilshikov et al.(MiBioGen)	Cluster headache, strict, including avohilmo（FinnGen Biobank）	order	3order.Bifidobacteriales.id.432	17	0.748744	0.976683	1.05727	0.751943	1.48657	0.178632	0.967379	2.46187	0.704344	8.60491	0.669779	0.995181	0.89883	0.550525	1.4675	0.501082	0.995167	0.718639	0.280512	1.84107	0.12764	0.995015	2.02545	0.856314	4.79084
Kurilshikov et al.(MiBioGen)	Cluster headache, strict, including avohilmo（FinnGen Biobank）	order	3order.Burkholderiales.id.2874	12	0.0122257	0.724193	0.558794	0.354436	0.880981	0.488031	0.967379	1.66955	0.413625	6.73895	0.186755	0.995181	0.663178	0.360434	1.22021	0.415205	0.995167	0.681911	0.281078	1.65435	0.443842	0.995015	0.697958	0.287373	1.69517
Kurilshikov et al.(MiBioGen)	Cluster headache, strict, including avohilmo（FinnGen Biobank）	order	3order.Clostridiales.id.1863	14	0.448658	0.956417	1.18821	0.760586	1.85626	0.859262	0.967379	1.17784	0.200447	6.92111	0.750831	0.995181	0.908381	0.501974	1.64382	0.771695	0.995167	0.8589	0.314015	2.34928	0.752213	0.995015	0.86794	0.36698	2.05276
Kurilshikov et al.(MiBioGen)	Cluster headache, strict, including avohilmo（FinnGen Biobank）	order	3order.Coriobacteriales.id.810	17	0.676045	0.976683	1.10279	0.696922	1.74502	0.153186	0.967379	2.27676	0.779571	6.64937	0.982427	0.995181	0.993619	0.562102	1.7564	0.493138	0.995167	0.655165	0.200978	2.13576	0.63979	0.995015	0.72344	0.191303	2.73579
Kurilshikov et al.(MiBioGen)	Cluster headache, strict, including avohilmo（FinnGen Biobank）	order	3order.Desulfovibrionales.id.315	12	0.252796	0.840924	1.30645	0.826265	2.0657	0.96181	0.976761	0.950563	0.125583	7.19499	0.889295	0.995181	1.04501	0.562199	1.94245	0.861194	0.995167	0.909207	0.320647	2.57809	0.860026	0.995015	0.909207	0.323481	2.55551
Kurilshikov et al.(MiBioGen)	Cluster headache, strict, including avohilmo（FinnGen Biobank）	order	3order.Enterobacteriales.id.3468	11	0.945307	0.979364	1.01648	0.637289	1.62128	0.26603	0.967379	3.64873	0.429587	30.9908	0.87363	0.995181	0.952931	0.526055	1.7262	0.79106	0.995167	0.880233	0.351206	2.20614	0.766476	0.995015	0.860915	0.329055	2.25244
Kurilshikov et al.(MiBioGen)	Cluster headache, strict, including avohilmo（FinnGen Biobank）	order	3order.Erysipelotrichales.id.214	13	0.268543	0.840924	0.761655	0.470214	1.23373	0.574927	0.967379	1.85271	0.228885	14.9968	0.684718	0.995181	0.871508	0.448695	1.69275	0.785439	0.995167	1.16755	0.39233	3.47457	0.762694	0.995015	1.17722	0.418081	3.31478
Kurilshikov et al.(MiBioGen)	Cluster headache, strict, including avohilmo（FinnGen Biobank）	order	3order.Gastranaerophilales.id.15	12	0.749497	0.976683	0.955111	0.720473	1.26616	0.139446	0.967379	0.478502	0.194583	1.17669	0.849371	0.995181	0.964377	0.663246	1.40223	0.995167	0.995167	0.998105	0.547808	1.81855	0.802019	0.995015	0.9317	0.543056	1.59848
Kurilshikov et al.(MiBioGen)	Cluster headache, strict, including avohilmo（FinnGen Biobank）	order	3order.Lactobacillales.id.1800	19	0.754465	0.976683	1.07105	0.696626	1.64671	0.752731	0.967379	0.836759	0.28106	2.49116	0.743543	0.995181	0.913976	0.533211	1.56664	0.992741	0.995167	1.00419	0.412744	2.44317	0.611783	0.995015	0.817514	0.380579	1.75609
Kurilshikov et al.(MiBioGen)	Cluster headache, strict, including avohilmo（FinnGen Biobank）	order	3order.Methanobacteriales.id.120	11	0.330893	0.866041	1.12916	0.883912	1.44246	0.221258	0.967379	1.84172	0.740788	4.57881	0.475258	0.995181	1.12395	0.815517	1.54903	0.245072	0.995167	1.40155	0.820216	2.39491	0.364634	0.995015	1.28318	0.767029	2.14666
Kurilshikov et al.(MiBioGen)	Cluster headache, strict, including avohilmo（FinnGen Biobank）	order	3order.MollicutesRF9.id.11579	15	0.773036	0.976683	1.04926	0.756779	1.45477	0.849973	0.967379	1.10412	0.40372	3.01961	0.534018	0.995181	1.15824	0.728996	1.84023	0.787814	0.995167	1.11694	0.5069	2.46113	0.736318	0.995015	1.14339	0.532297	2.45603
Kurilshikov et al.(MiBioGen)	Cluster headache, strict, including avohilmo（FinnGen Biobank）	order	3order.NB1n.id.3953	15	0.683924	0.976683	0.947623	0.731392	1.22778	0.977511	0.977511	0.982764	0.300232	3.21693	0.75056	0.995181	0.949159	0.688055	1.30935	0.791141	0.995167	0.929273	0.545555	1.58288	0.938839	0.995015	0.977758	0.556088	1.71917
Kurilshikov et al.(MiBioGen)	Cluster headache, strict, including avohilmo（FinnGen Biobank）	order	3order.Pasteurellales.id.3688	18	0.600533	0.976683	1.08328	0.802977	1.46143	0.904992	0.967379	1.04491	0.513695	2.12546	0.574933	0.995181	0.890883	0.594898	1.33413	0.573464	0.995167	0.802895	0.379421	1.69901	0.415512	0.995015	0.78117	0.437391	1.39515
Kurilshikov et al.(MiBioGen)	Cluster headache, strict, including avohilmo（FinnGen Biobank）	order	3order.Rhodospirillales.id.2667	14	0.443371	0.956417	1.12966	0.827101	1.5429	0.152715	0.967379	2.48064	0.772803	7.96269	0.232982	0.995181	1.29323	0.847535	1.9733	0.395352	0.995167	1.37338	0.676937	2.78633	0.263931	0.995015	1.45781	0.774297	2.74469
Kurilshikov et al.(MiBioGen)	Cluster headache, strict, including avohilmo（FinnGen Biobank）	order	3order.Selenomonadales.id.2165	13	0.0836114	0.840924	0.663485	0.416857	1.05603	0.731459	0.967379	0.744071	0.143491	3.85837	0.550616	0.995181	0.831535	0.453701	1.52402	0.908369	0.995167	0.941278	0.343161	2.58189	0.9235	0.995015	0.947829	0.324816	2.76581
Kurilshikov et al.(MiBioGen)	Cluster headache, strict, including avohilmo（FinnGen Biobank）	order	3order.Verrucomicrobiales.id.403	12	0.888794	0.979364	1.02805	0.697586	1.51507	0.491635	0.967379	1.65441	0.415273	6.59103	0.570573	0.995181	1.17797	0.668853	2.07461	0.809746	0.995167	1.11561	0.467633	2.66146	0.601755	0.995015	1.24929	0.554693	2.81368
Kurilshikov et al.(MiBioGen)	Cluster headache, strict, including avohilmo（FinnGen Biobank）	order	3order.Victivallales.id.2254	10	0.128169	0.840924	0.758826	0.531773	1.08282	0.292082	0.967379	2.03932	0.591074	7.03604	0.186476	0.995181	0.767909	0.51898	1.13624	0.531151	0.995167	0.803017	0.414945	1.55403	0.497487	0.995015	0.803017	0.437098	1.47527
Kurilshikov et al.(MiBioGen)	Cluster headache, strict, including avohilmo（FinnGen Biobank）	family	4family.Acidaminococcaceae.id.21	8	0.43026	0.956417	0.836727	0.537288	1.30305	0.706721	0.967379	0.775433	0.219295	2.74196	0.483128	0.995181	0.806867	0.442918	1.46987	0.736511	0.995167	0.850099	0.342522	2.10984	0.946305	0.995015	0.969546	0.406825	2.31062
Kurilshikov et al.(MiBioGen)	Cluster headache, strict, including avohilmo（FinnGen Biobank）	family	4family.Actinomycetaceae.id.421	4	0.72107	0.976683	1.11853	0.604755	2.0688	0.842862	0.967379	1.20598	0.235962	6.16368	0.842105	0.995181	1.06326	0.581479	1.94421	0.991795	0.995167	1.0048	0.433164	2.33083	0.930859	0.995015	1.03364	0.519421	2.05693
Kurilshikov et al.(MiBioGen)	Cluster headache, strict, including avohilmo（FinnGen Biobank）	family	4family.Alcaligenaceae.id.2875	16	0.0145818	0.724193	0.59673	0.394328	0.903023	0.38032	0.967379	2.25161	0.388896	13.0362	0.112013	0.995181	0.624417	0.349326	1.11614	0.443425	0.995167	0.660599	0.235295	1.85465	0.419385	0.995015	0.649318	0.234287	1.79956
Kurilshikov et al.(MiBioGen)	Cluster headache, strict, including avohilmo（FinnGen Biobank）	family	4family.Bacteroidaceae.id.917	11	0.806354	0.976683	0.940403	0.575364	1.53704	0.304889	0.967379	0.230061	0.0162996	3.2472	0.339321	0.995181	0.72689	0.377836	1.39841	0.464334	0.995167	0.672445	0.241915	1.86917	0.37497	0.995015	0.659278	0.273636	1.58841
Kurilshikov et al.(MiBioGen)	Cluster headache, strict, including avohilmo（FinnGen Biobank）	family	4family.BacteroidalesS24.7group.	10	0.856579	0.979364	0.968537	0.684772	1.36989	0.922998	0.967379	0.92787	0.213122	4.03967	0.76336	0.995181	1.06659	0.701023	1.62279	0.818645	0.995167	1.07749	0.579869	2.00215	0.797193	0.995015	1.0872	0.585428	2.01903
Kurilshikov et al.(MiBioGen)	Cluster headache, strict, including avohilmo（FinnGen Biobank）	family	4family.Bifidobacteriaceae.id.43	17	0.748744	0.976683	1.05727	0.751943	1.48657	0.178632	0.967379	2.46187	0.704344	8.60491	0.674679	0.995181	0.89883	0.546223	1.47906	0.53379	0.995167	0.718639	0.259591	1.98945	0.127974	0.995015	2.02545	0.855619	4.79473
Kurilshikov et al.(MiBioGen)	Cluster headache, strict, including avohilmo（FinnGen Biobank）	family	4family.Christensenellaceae.id.1	11	0.657948	0.976683	1.09421	0.734525	1.63003	0.76243	0.967379	0.88133	0.398172	1.95077	0.814961	0.995181	1.06452	0.630592	1.79704	0.887975	0.995167	0.945107	0.439447	2.03261	0.890446	0.995015	1.04398	0.574605	1.89679
Kurilshikov et al.(MiBioGen)	Cluster headache, strict, including avohilmo（FinnGen Biobank）	family	4family.Clostridiaceae1.id.1869	11	0.455742	0.957082	0.844646	0.54199	1.31631	0.39601	0.967379	1.82844	0.484962	6.89369	0.927293	0.995181	1.02831	0.564586	1.87291	0.728785	0.995167	1.18116	0.473039	2.94931	0.695758	0.995015	1.18116	0.525085	2.65698
Kurilshikov et al.(MiBioGen)	Cluster headache, strict, including avohilmo（FinnGen Biobank）	family	4family.ClostridialesvadinBB60gr	17	0.0320685	0.840924	0.717888	0.530199	0.972017	0.849628	0.967379	1.08733	0.464392	2.5459	0.131007	0.995181	0.717058	0.465672	1.10415	0.0798877	0.995167	0.460362	0.20417	1.03802	0.0656108	0.995015	0.501414	0.25286	0.99429
Kurilshikov et al.(MiBioGen)	Cluster headache, strict, including avohilmo（FinnGen Biobank）	family	4family.Coriobacteriaceae.id.811	17	0.676045	0.976683	1.10279	0.696922	1.74502	0.153186	0.967379	2.27676	0.779571	6.64937	0.982972	0.995181	0.993619	0.551953	1.7887	0.527095	0.995167	0.655165	0.181809	2.36095	0.636413	0.995015	0.72344	0.193883	2.69939
Kurilshikov et al.(MiBioGen)	Cluster headache, strict, including avohilmo（FinnGen Biobank）	family	4family.Defluviitaleaceae.id.192	12	0.469705	0.957082	0.881744	0.626846	1.24029	0.649717	0.967379	0.748108	0.221967	2.52139	0.401479	0.995181	0.820062	0.515915	1.30351	0.37181	0.995167	0.696074	0.324654	1.49241	0.401489	0.995015	0.740578	0.377252	1.45382
Kurilshikov et al.(MiBioGen)	Cluster headache, strict, including avohilmo（FinnGen Biobank）	family	4family.Desulfovibrionaceae.id.3	11	0.237098	0.840924	1.33359	0.827478	2.14926	0.899282	0.967379	0.870058	0.10701	7.07414	0.686767	0.995181	1.13852	0.606026	2.1389	0.813021	0.995167	0.871576	0.287437	2.64282	0.799016	0.995015	0.877567	0.329721	2.33568
Kurilshikov et al.(MiBioGen)	Cluster headache, strict, including avohilmo（FinnGen Biobank）	family	4family.Enterobacteriaceae.id.34	11	0.945307	0.979364	1.01648	0.637289	1.62128	0.26603	0.967379	3.64873	0.429587	30.9908	0.873467	0.995181	0.952931	0.526461	1.72487	0.804192	0.995167	0.880233	0.329677	2.35021	0.75939	0.995015	0.860915	0.338846	2.18735
Kurilshikov et al.(MiBioGen)	Cluster headache, strict, including avohilmo（FinnGen Biobank）	family	4family.Erysipelotrichaceae.id.2	13	0.268543	0.840924	0.761655	0.470214	1.23373	0.574927	0.967379	1.85271	0.228885	14.9968	0.66661	0.995181	0.871508	0.466154	1.62935	0.794604	0.995167	1.16755	0.373192	3.65274	0.764588	0.995015	1.17722	0.414495	3.34346
Kurilshikov et al.(MiBioGen)	Cluster headache, strict, including avohilmo（FinnGen Biobank）	family	4family.Lachnospiraceae.id.1987	17	0.692334	0.976683	0.917627	0.599431	1.40473	0.932829	0.967379	1.0698	0.22867	5.00494	0.761044	0.995181	0.914229	0.512926	1.62951	0.938556	0.995167	0.95763	0.324026	2.8302	0.850876	0.995015	0.909218	0.342514	2.41356
Kurilshikov et al.(MiBioGen)	Cluster headache, strict, including avohilmo（FinnGen Biobank）	family	4family.Lactobacillaceae.id.1836	11	0.506499	0.958875	1.16241	0.745616	1.8122	0.932233	0.967379	1.05722	0.30374	3.67985	0.810769	0.995181	1.05584	0.676765	1.64723	0.748903	0.995167	0.882098	0.41782	1.86228	0.824961	0.995015	1.07164	0.589727	1.94736
Kurilshikov et al.(MiBioGen)	Cluster headache, strict, including avohilmo（FinnGen Biobank）	family	4family.Methanobacteriaceae.id.1	11	0.330893	0.866041	1.12916	0.883912	1.44246	0.221258	0.967379	1.84172	0.740788	4.57881	0.470158	0.995181	1.12395	0.818519	1.54335	0.227647	0.995167	1.40155	0.837615	2.34516	0.37193	0.995015	1.28318	0.760735	2.16442
Kurilshikov et al.(MiBioGen)	Cluster headache, strict, including avohilmo（FinnGen Biobank）	family	4family.Oxalobacteraceae.id.2966	15	0.837147	0.979364	1.02391	0.817326	1.28272	0.874332	0.967379	0.929891	0.384465	2.2491	0.779211	0.995181	0.954912	0.691643	1.31839	0.967398	0.995167	0.988619	0.576588	1.69509	0.885972	0.995015	0.960368	0.55813	1.65249
Kurilshikov et al.(MiBioGen)	Cluster headache, strict, including avohilmo（FinnGen Biobank）	family	4family.Pasteurellaceae.id.3689	18	0.600533	0.976683	1.08328	0.802977	1.46143	0.904992	0.967379	1.04491	0.513695	2.12546	0.569528	0.995181	0.890883	0.598264	1.32662	0.594162	0.995167	0.802895	0.363524	1.77331	0.437842	0.995015	0.78117	0.424778	1.43658
Kurilshikov et al.(MiBioGen)	Cluster headache, strict, including avohilmo（FinnGen Biobank）	family	4family.Peptococcaceae.id.2024	9	0.362307	0.89138	0.823423	0.542104	1.25073	0.927248	0.967379	1.06099	0.311385	3.61511	0.981967	0.995181	0.993947	0.587076	1.6828	0.684001	0.995167	1.21184	0.496662	2.95684	0.584893	0.995015	1.25187	0.577534	2.71356
Kurilshikov et al.(MiBioGen)	Cluster headache, strict, including avohilmo（FinnGen Biobank）	family	4family.Peptostreptococcaceae.id	15	0.448514	0.956417	1.14385	0.808021	1.61924	0.559818	0.967379	0.781528	0.348601	1.75211	0.666399	0.995181	1.10785	0.695411	1.76491	0.659068	0.995167	0.830404	0.370117	1.86312	0.276432	0.995015	1.54391	0.728096	3.27383
Kurilshikov et al.(MiBioGen)	Cluster headache, strict, including avohilmo（FinnGen Biobank）	family	4family.Porphyromonadaceae.id.94	10	0.0766497	0.840924	1.65407	0.947552	2.8874	0.321955	0.967379	3.80061	0.318618	45.3352	0.146821	0.995181	1.6539	0.838144	3.26362	0.152138	0.995167	2.50479	0.792855	7.91315	0.917674	0.995015	1.05902	0.367866	3.04875
Kurilshikov et al.(MiBioGen)	Cluster headache, strict, including avohilmo（FinnGen Biobank）	family	4family.Prevotellaceae.id.960	18	0.693615	0.976683	1.07247	0.757192	1.51904	0.819383	0.967379	0.875246	0.284114	2.69629	0.781305	0.995181	0.937879	0.59635	1.475	0.628281	0.995167	0.819161	0.370676	1.81027	0.614492	0.995015	0.831316	0.410462	1.68368
Kurilshikov et al.(MiBioGen)	Cluster headache, strict, including avohilmo（FinnGen Biobank）	family	4family.Rhodospirillaceae.id.271	16	0.34023	0.866041	1.1675	0.84925	1.60501	0.357896	0.967379	1.86829	0.515	6.77768	0.224491	0.995181	1.28934	0.855616	1.94291	0.422129	0.995167	1.36529	0.651753	2.86	0.274518	0.995015	1.43896	0.767224	2.69883
Kurilshikov et al.(MiBioGen)	Cluster headache, strict, including avohilmo（FinnGen Biobank）	family	4family.Rikenellaceae.id.967	18	0.51854	0.963776	1.14654	0.756985	1.73656	0.486987	0.967379	1.61823	0.429765	6.09326	0.695806	0.995181	0.900709	0.533237	1.52142	0.629501	0.995167	0.781885	0.292983	2.08662	0.528893	0.995015	0.748591	0.309621	1.80992
Kurilshikov et al.(MiBioGen)	Cluster headache, strict, including avohilmo（FinnGen Biobank）	family	4family.Ruminococcaceae.id.2050	12	0.974258	0.979364	1.00721	0.650872	1.55865	0.578022	0.967379	1.32664	0.506169	3.47706	0.811794	0.995181	1.0757	0.58996	1.96138	0.82386	0.995167	1.11218	0.445822	2.77452	0.73968	0.995015	1.14344	0.528945	2.47182
Kurilshikov et al.(MiBioGen)	Cluster headache, strict, including avohilmo（FinnGen Biobank）	family	4family.Streptococcaceae.id.1850	14	0.391034	0.934666	1.20152	0.789842	1.82778	0.350839	0.967379	0.455051	0.092823	2.23082	0.431207	0.995181	1.25583	0.712175	2.2145	0.396689	0.995167	1.55573	0.579048	4.17981	0.575357	0.995015	1.31779	0.514116	3.37776
Kurilshikov et al.(MiBioGen)	Cluster headache, strict, including avohilmo（FinnGen Biobank）	family	4family.Veillonellaceae.id.2172	20	0.982339	0.982339	1.00361	0.729212	1.38127	0.951958	0.97179	0.97973	0.507898	1.88989	0.673531	0.995181	1.10141	0.702746	1.72622	0.745284	0.995167	1.12708	0.553401	2.29544	0.873336	0.995015	1.04838	0.59107	1.85951
Kurilshikov et al.(MiBioGen)	Cluster headache, strict, including avohilmo（FinnGen Biobank）	family	4family.Verrucomicrobiaceae.id.4	12	0.888511	0.979364	1.02813	0.697577	1.51532	0.490991	0.967379	1.65559	0.415631	6.59475	0.530731	0.995181	1.17799	0.705849	1.96596	0.819372	0.995167	1.11576	0.445564	2.79404	0.616054	0.995015	1.24946	0.536217	2.91142
Kurilshikov et al.(MiBioGen)	Cluster headache, strict, including avohilmo（FinnGen Biobank）	family	4family.Victivallaceae.id.2255	13	0.243288	0.840924	0.854494	0.656136	1.11282	0.946838	0.971625	1.04738	0.276955	3.96098	0.64575	0.995181	0.932643	0.692764	1.25558	0.936702	0.995167	1.02079	0.620778	1.67856	0.977085	0.995015	0.992884	0.616052	1.60022
Kurilshikov et al.(MiBioGen)	Cluster headache, strict, including avohilmo（FinnGen Biobank）	family	4family4familyXI.id.1936	10	0.145664	0.840924	0.841555	0.667059	1.0617	0.883468	0.967379	1.0986	0.324996	3.71364	0.845644	0.995181	0.968738	0.703614	1.33376	0.859714	0.995167	1.05052	0.617662	1.78671	0.818627	0.995015	1.05982	0.654288	1.71672
4family4familyXIII.id.1957
Kurilshikov et al.(MiBioGen)	Cluster headache, strict, including avohilmo（FinnGen Biobank）	family	4familyXIIIAD3011group.id.	10	0.267017	0.840924	0.721728	0.405775	1.28369	0.0947446	0.967379	8.91195	0.927334	85.6464	0.680352	0.995181	0.85644	0.409736	1.79015	0.966207	0.995167	1.02764	0.301321	3.50471	0.96572	0.995015	1.02764	0.306623	3.44412
Kurilshikov et al.(MiBioGen)	Cluster headache, strict, including avohilmo（FinnGen Biobank）	genus	4familyXIIIUCG001.id.11294	15	0.909892	0.979364	0.977592	0.660245	1.44747	0.778366	0.967379	0.754531	0.110496	5.15238	0.901828	0.995181	1.03227	0.623215	1.70981	0.893848	0.995167	1.05971	0.459094	2.44608	0.821012	0.995015	1.09157	0.518255	2.2991
Kurilshikov et al.(MiBioGen)	Cluster headache, strict, including avohilmo（FinnGen Biobank）	genus	5genus..Clostridiuminnocuumgroup	9	0.546027	0.964157	0.865494	0.541491	1.38337	0.876629	0.967379	1.12656	0.2641	4.80551	0.676601	0.995181	0.8805	0.484184	1.60121	0.892701	0.995167	0.942764	0.411237	2.16129	0.868848	0.995015	0.9327	0.418709	2.07765
Kurilshikov et al.(MiBioGen)	Cluster headache, strict, including avohilmo（FinnGen Biobank）	genus	5genus..Eubacteriumbrachygroup.i	10	0.419222	0.956417	1.10822	0.863667	1.42201	0.899861	0.967379	0.916769	0.247041	3.40213	0.515876	0.995181	1.11859	0.797712	1.56854	0.60405	0.995167	1.13628	0.713021	1.8108	0.722086	0.995015	1.09211	0.682201	1.74832
Kurilshikov et al.(MiBioGen)	Cluster headache, strict, including avohilmo（FinnGen Biobank）	genus	5genus..Eubacteriumcoprostanolig	11	0.483424	0.957082	0.915017	0.713765	1.17301	0.819041	0.967379	1.11456	0.452048	2.74804	0.877054	0.995181	0.974281	0.700362	1.35533	0.94564	0.995167	0.981084	0.57437	1.67579	0.979785	0.995015	0.992884	0.579298	1.70175
Kurilshikov et al.(MiBioGen)	Cluster headache, strict, including avohilmo（FinnGen Biobank）	genus	5genus..Eubacteriumeligensgroup.	13	0.297772	0.845846	1.28148	0.803445	2.04392	0.144337	0.967379	4.23561	0.699972	25.6301	0.556729	0.995181	1.21809	0.630873	2.35187	0.705124	0.995167	0.805588	0.269965	2.40391	0.700674	0.995015	0.791725	0.24757	2.53193
Kurilshikov et al.(MiBioGen)	Cluster headache, strict, including avohilmo（FinnGen Biobank）	genus	5genus..Eubacteriumfissicatenagr	9	0.94821	0.979364	0.985504	0.63432	1.53112	0.654602	0.967379	0.755479	0.232948	2.45011	0.902056	0.995181	0.9655	0.551957	1.68888	0.954944	0.995167	1.0247	0.451207	2.32709	0.949521	0.995015	0.97568	0.466087	2.04243
Kurilshikov et al.(MiBioGen)	Cluster headache, strict, including avohilmo（FinnGen Biobank）	genus	5genus..Eubacteriumhalliigroup.i	9	0.119707	0.840924	1.48097	0.903067	2.4287	0.374935	0.967379	3.65445	0.250365	53.3423	0.0142793	0.995181	1.67668	1.10892	2.53513	0.0644269	0.995167	2.01614	1.06186	3.82804	0.0957627	0.995015	1.85356	0.976645	3.51785
Kurilshikov et al.(MiBioGen)	Cluster headache, strict, including avohilmo（FinnGen Biobank）	genus	5genus..Eubacteriumnodatumgroup.	14	0.953984	0.979364	0.988665	0.671254	1.45617	0.296814	0.967379	0.64211	0.28966	1.42341	0.964779	0.995181	1.01234	0.587241	1.74518	0.881515	0.995167	1.06852	0.454612	2.51146	0.908241	0.995015	1.04376	0.510946	2.1322
Kurilshikov et al.(MiBioGen)	Cluster headache, strict, including avohilmo（FinnGen Biobank）	genus	5genus..Eubacteriumoxidoreducens	11	0.236416	0.840924	0.853002	0.655606	1.10983	0.183134	0.967379	0.429922	0.136504	1.35405	0.700303	0.995181	0.935582	0.666543	1.31321	0.809421	0.995167	1.0847	0.569963	2.0643	0.939717	0.995015	1.0234	0.570404	1.83614
Kurilshikov et al.(MiBioGen)	Cluster headache, strict, including avohilmo（FinnGen Biobank）	genus	5genus..Eubacteriumrectalegroup.	6	0.267924	0.840924	0.807411	0.553003	1.17886	0.242353	0.967379	2.87194	0.635351	12.9818	0.533628	0.995181	0.85612	0.524935	1.39625	0.557652	0.995167	0.789996	0.378477	1.64896	0.620376	0.995015	0.827852	0.41032	1.67026
Kurilshikov et al.(MiBioGen)	Cluster headache, strict, including avohilmo（FinnGen Biobank）	genus	5genus..Eubacteriumruminantiumgr	11	0.592121	0.976683	0.858072	0.490155	1.50215	0.291796	0.967379	0.415026	0.0890394	1.9345	0.207269	0.995181	0.668005	0.356825	1.25056	0.345803	0.995167	0.608104	0.227006	1.62899	0.27978	0.995015	0.640848	0.298742	1.37472
Kurilshikov et al.(MiBioGen)	Cluster headache, strict, including avohilmo（FinnGen Biobank）	genus	5genus..Eubacteriumventriosumgro	19	0.671047	0.976683	1.06367	0.800012	1.41422	0.4442	0.967379	1.4626	0.564898	3.78686	0.675829	0.995181	0.931711	0.6688	1.29797	0.762178	0.995167	0.917174	0.528356	1.59212	0.813186	0.995015	0.944411	0.591767	1.5072
Kurilshikov et al.(MiBioGen)	Cluster headache, strict, including avohilmo（FinnGen Biobank）	genus	5genus..Eubacteriumxylanophilumg	16	0.508791	0.958875	1.13886	0.774382	1.67488	0.861597	0.967379	0.854545	0.150756	4.84392	0.391956	0.995181	1.26306	0.739963	2.15596	0.681186	0.995167	1.2448	0.446881	3.46745	0.578275	0.995015	1.2661	0.561096	2.85692
Kurilshikov et al.(MiBioGen)	Cluster headache, strict, including avohilmo（FinnGen Biobank）	genus	5genus..Ruminococcusgauvreauiigr	12	0.726415	0.976683	1.07726	0.710009	1.63449	0.258503	0.967379	2.16073	0.612661	7.62042	0.590916	0.995181	1.16861	0.662083	2.06267	0.942275	0.995167	1.03734	0.3933	2.736	0.881183	0.995015	1.0672	0.46382	2.45552
Kurilshikov et al.(MiBioGen)	Cluster headache, strict, including avohilmo（FinnGen Biobank）	genus	5genus..Ruminococcusgnavusgroup.	12	0.3323	0.866041	0.818134	0.545235	1.22762	0.605263	0.967379	0.616085	0.103988	3.65005	0.0909044	0.995181	0.60957	0.343397	1.08206	0.246926	0.995167	0.574438	0.236247	1.39675	0.252572	0.995015	0.568892	0.227713	1.42125
Kurilshikov et al.(MiBioGen)	Cluster headache, strict, including avohilmo（FinnGen Biobank）	genus	5genus..Ruminococcustorquesgroup	11	0.545756	0.964157	0.911216	0.673938	1.23203	0.573486	0.967379	0.649294	0.152438	2.76559	0.507012	0.995181	0.868999	0.573959	1.3157	0.567041	0.995167	0.833487	0.456014	1.52342	0.60262	0.995015	0.848893	0.467149	1.54259
Kurilshikov et al.(MiBioGen)	Cluster headache, strict, including avohilmo（FinnGen Biobank）	genus	5genus.Actinomyces.id.423	11	0.371479	0.898887	1.34189	0.704076	2.55749	0.770646	0.967379	1.45651	0.125312	16.929	0.585853	0.995181	0.803835	0.366459	1.76323	0.402901	0.995167	0.589464	0.180042	1.92992	0.479561	0.995015	0.595166	0.149004	2.37728
Kurilshikov et al.(MiBioGen)	Cluster headache, strict, including avohilmo（FinnGen Biobank）	genus	5genus.Adlercreutzia.id.812	8	0.413266	0.956417	1.19487	0.779991	1.83042	0.704532	0.967379	0.799221	0.264922	2.4111	0.890643	0.995181	1.03699	0.617842	1.7405	0.923359	0.995167	1.03839	0.495206	2.17739	0.972724	0.995015	1.01035	0.571576	1.78596
Kurilshikov et al.(MiBioGen)	Cluster headache, strict, including avohilmo（FinnGen Biobank）	genus	5genus.Akkermansia.id.4037	12	0.181768	0.840924	1.25777	0.898267	1.76116	0.56651	0.967379	1.64238	0.318407	8.47164	0.136844	0.995181	1.42377	0.893881	2.26779	0.268082	0.995167	1.61938	0.720429	3.64003	0.249793	0.995015	1.61938	0.744117	3.52415
Kurilshikov et al.(MiBioGen)	Cluster headache, strict, including avohilmo（FinnGen Biobank）	genus	5genus.Alistipes.id.968	12	0.887838	0.979364	1.02829	0.697798	1.51532	0.489249	0.967379	1.65838	0.416783	6.59867	0.547961	0.995181	1.1774	0.691121	2.00583	0.816311	0.995167	1.11581	0.452445	2.75176	0.617086	0.995015	1.24944	0.534903	2.91846
Kurilshikov et al.(MiBioGen)	Cluster headache, strict, including avohilmo（FinnGen Biobank）	genus	5genus.Allisonella.id.2174	13	0.158276	0.840924	0.698364	0.424113	1.14996	0.878179	0.967379	0.819961	0.0686726	9.79045	0.0916485	0.995181	0.559417	0.284845	1.09866	0.168374	0.995167	0.430075	0.139182	1.32894	0.155048	0.995015	0.434036	0.147686	1.27559
Kurilshikov et al.(MiBioGen)	Cluster headache, strict, including avohilmo（FinnGen Biobank）	genus	5genus.Alloprevotella.id.961	9	0.835664	0.979364	1.03491	0.748319	1.43127	0.331685	0.967379	0.328954	0.040702	2.65861	0.907484	0.995181	0.980934	0.708985	1.35719	0.811448	0.995167	0.942165	0.586762	1.51283	0.72927	0.995015	0.91789	0.574567	1.46636
Kurilshikov et al.(MiBioGen)	Cluster headache, strict, including avohilmo（FinnGen Biobank）	genus	5genus.Anaerofilum.id.2053	6	0.758785	0.976683	0.955357	0.713784	1.27869	0.688508	0.967379	0.563117	0.0414097	7.65764	0.792684	0.995181	0.952883	0.664858	1.36568	0.613311	0.995167	0.856801	0.488196	1.50372	0.573879	0.995015	0.850112	0.500708	1.44334
Kurilshikov et al.(MiBioGen)	Cluster headache, strict, including avohilmo（FinnGen Biobank）	genus	5genus.Anaerostipes.id.1991	11	0.945281	0.979364	1.00957	0.769236	1.32498	0.706922	0.967379	1.28412	0.363241	4.5396	0.947411	0.995181	0.98737	0.676784	1.44049	0.953925	0.995167	1.01785	0.566889	1.82754	0.952412	0.995015	1.01785	0.577553	1.7938
Kurilshikov et al.(MiBioGen)	Cluster headache, strict, including avohilmo（FinnGen Biobank）	genus	5genus.Anaerotruncus.id.2054	15	0.714011	0.976683	1.11155	0.631386	1.95686	0.532452	0.967379	0.569956	0.102249	3.17706	0.499259	0.995181	0.795582	0.409812	1.54449	0.575659	0.995167	0.710601	0.220901	2.28589	0.604203	0.995015	0.748547	0.256651	2.1832
Kurilshikov et al.(MiBioGen)	Cluster headache, strict, including avohilmo（FinnGen Biobank）	genus	5genus.Bacteroides.id.918	15	0.555944	0.964292	1.14166	0.734567	1.77437	0.455864	0.967379	0.593301	0.156715	2.24615	0.748542	0.995181	0.910988	0.515186	1.61088	0.549474	0.995167	0.721415	0.254106	2.04812	0.502578	0.995015	0.746029	0.323859	1.71852
Kurilshikov et al.(MiBioGen)	Cluster headache, strict, including avohilmo（FinnGen Biobank）	genus	5genus.Barnesiella.id.944	11	0.806354	0.976683	0.940403	0.575364	1.53704	0.304889	0.967379	0.230061	0.0162996	3.2472	0.319621	0.995181	0.72689	0.387835	1.36235	0.452142	0.995167	0.672445	0.248819	1.81731	0.397113	0.995015	0.659278	0.261943	1.65932
Kurilshikov et al.(MiBioGen)	Cluster headache, strict, including avohilmo（FinnGen Biobank）	genus	5genus.Bifidobacterium.id.436	15	0.483354	0.957082	1.1487	0.779562	1.69262	0.488151	0.967379	1.87225	0.334325	10.4848	0.63526	0.995181	1.14679	0.651172	2.01962	0.317242	0.995167	1.68227	0.629515	4.49556	0.516437	0.995015	1.35549	0.553548	3.31923
Kurilshikov et al.(MiBioGen)	Cluster headache, strict, including avohilmo（FinnGen Biobank）	genus	5genus.Bilophila.id.3170	15	0.953733	0.979364	0.988806	0.676015	1.44633	0.153013	0.967379	2.0735	0.808571	5.31729	0.755119	0.995181	1.08905	0.637151	1.86144	0.837372	0.995167	0.905591	0.357485	2.29407	0.753295	0.995015	1.12803	0.540006	2.35636
Kurilshikov et al.(MiBioGen)	Cluster headache, strict, including avohilmo（FinnGen Biobank）	genus	5genus.Blautia.id.1992	16	0.180404	0.840924	0.778521	0.539727	1.12296	0.219043	0.967379	2.71779	0.592685	12.4626	0.321386	0.995181	0.777115	0.472086	1.27923	0.433512	0.995167	0.690213	0.279795	1.70265	0.455809	0.995015	0.752815	0.363906	1.55736
Kurilshikov et al.(MiBioGen)	Cluster headache, strict, including avohilmo（FinnGen Biobank）	genus	5genus.Butyricicoccus.id.2055	12	0.101881	0.840924	0.595191	0.319633	1.10831	0.915123	0.967379	0.911143	0.171758	4.83345	0.386765	0.995181	0.736473	0.368402	1.47228	0.552279	0.995167	0.699593	0.223271	2.19209	0.485567	0.995015	0.690316	0.252291	1.88883
Kurilshikov et al.(MiBioGen)	Cluster headache, strict, including avohilmo（FinnGen Biobank）	genus	5genus.Butyricimonas.id.945	9	0.244972	0.840924	0.745881	0.455003	1.22271	0.404638	0.967379	0.638338	0.236679	1.72164	0.479345	0.995181	0.784925	0.401246	1.53549	0.452353	0.995167	0.66607	0.243009	1.82565	0.519856	0.995015	0.741575	0.310495	1.77115
Kurilshikov et al.(MiBioGen)	Cluster headache, strict, including avohilmo（FinnGen Biobank）	genus	5genus.Butyrivibrio.id.1993	17	0.504905	0.958875	1.14072	0.774649	1.67978	0.804252	0.967379	1.22536	0.252648	5.94311	0.718375	0.995181	1.09281	0.674605	1.77029	0.994962	0.995167	0.996864	0.381796	2.6028	0.995024	0.996992	0.996864	0.377193	2.63456
Kurilshikov et al.(MiBioGen)	Cluster headache, strict, including avohilmo（FinnGen Biobank）	genus	5genus.CandidatusSoleaferrea.id.	16	0.238688	0.840924	0.882404	0.716618	1.08654	0.778352	0.967379	0.873732	0.34751	2.19679	0.0595147	0.995181	0.77602	0.596109	1.01023	0.134249	0.995167	0.703026	0.454476	1.08751	0.127428	0.995015	0.710443	0.469026	1.07612
Kurilshikov et al.(MiBioGen)	Cluster headache, strict, including avohilmo（FinnGen Biobank）	genus	5genus.Catenibacterium.id.2153	15	0.191932	0.840924	1.22332	0.903754	1.65589	0.424211	0.967379	0.568356	0.148495	2.17536	0.905212	0.995181	1.02303	0.703233	1.48827	0.762921	0.995167	0.894275	0.438773	1.82264	0.695646	0.995015	0.873852	0.450849	1.69373
Kurilshikov et al.(MiBioGen)	Cluster headache, strict, including avohilmo（FinnGen Biobank）	genus	5genus.ChristensenellaceaeR.7gro	4	0.679053	0.976683	0.889965	0.512326	1.54596	0.792086	0.967379	3.54567	0.000923744	13609.6	0.995181	0.995181	0.998503	0.614001	1.62379	0.700043	0.995167	1.19834	0.519343	2.76505	0.644473	0.995015	1.19017	0.610527	2.32012
Kurilshikov et al.(MiBioGen)	Cluster headache, strict, including avohilmo（FinnGen Biobank）	genus	5genus.Clostridiumsensustricto1.	9	0.173639	0.840924	1.47409	0.842868	2.57802	0.487352	0.967379	0.466235	0.0606066	3.58666	0.662675	0.995181	1.1778	0.564604	2.45695	0.971891	0.995167	1.01976	0.35505	2.92892	0.961235	0.995015	1.02797	0.349699	3.02181
Kurilshikov et al.(MiBioGen)	Cluster headache, strict, including avohilmo（FinnGen Biobank）	genus	5genus.Collinsella.id.815	8	0.85259	0.979364	0.956912	0.601323	1.52278	0.419965	0.967379	1.7483	0.493467	6.19404	0.988735	0.995181	1.00436	0.548725	1.83835	0.669168	0.995167	1.22735	0.498714	3.02057	0.688055	0.995015	1.19659	0.516391	2.77277
Kurilshikov et al.(MiBioGen)	Cluster headache, strict, including avohilmo（FinnGen Biobank）	genus	5genus.Coprobacter.id.949	12	0.791402	0.976683	0.938222	0.584893	1.50499	0.336049	0.967379	2.7235	0.39012	19.0133	0.67101	0.995181	1.14669	0.609735	2.15651	0.688429	0.995167	1.24521	0.438409	3.53675	0.636001	0.995015	1.27662	0.477489	3.4132
Kurilshikov et al.(MiBioGen)	Cluster headache, strict, including avohilmo（FinnGen Biobank）	genus	5genus.Coprococcus1.id.11301	14	0.531061	0.963776	1.09131	0.830244	1.43447	0.52745	0.967379	1.34333	0.552244	3.26763	0.672649	0.995181	0.926589	0.65055	1.31976	0.682798	0.995167	0.881994	0.489473	1.58929	0.654243	0.995015	0.876203	0.497956	1.54177
Kurilshikov et al.(MiBioGen)	Cluster headache, strict, including avohilmo（FinnGen Biobank）	genus	5genus.Coprococcus2.id.11302	14	0.0109743	0.724193	0.588506	0.391133	0.885478	0.293505	0.967379	0.53585	0.176045	1.63103	0.0379094	0.995181	0.543158	0.305242	0.966515	0.982144	0.995167	0.988414	0.363196	2.6899	0.411038	0.995015	0.698691	0.305467	1.59811
Kurilshikov et al.(MiBioGen)	Cluster headache, strict, including avohilmo（FinnGen Biobank）	genus	5genus.Coprococcus3.id.11303	10	0.459507	0.957082	0.830359	0.507377	1.35894	0.671973	0.967379	1.87341	0.113925	30.8068	0.360121	0.995181	0.76322	0.427872	1.3614	0.557895	0.995167	0.75091	0.29844	1.88938	0.500946	0.995015	0.728632	0.300713	1.76549
Kurilshikov et al.(MiBioGen)	Cluster headache, strict, including avohilmo（FinnGen Biobank）	genus	5genus.DefluviitaleaceaeUCG011.i	9	0.191944	0.840924	0.644603	0.333298	1.24667	0.0376629	0.967379	0.00728441	0.000167684	0.316444	0.419905	0.995181	0.74562	0.365372	1.5216	0.514942	0.995167	0.712181	0.268217	1.89101	0.511076	0.995015	0.712181	0.270688	1.87375
Kurilshikov et al.(MiBioGen)	Cluster headache, strict, including avohilmo（FinnGen Biobank）	genus	5genus.Desulfovibrio.id.3173	10	0.844915	0.979364	0.962926	0.659469	1.40602	0.869148	0.967379	0.88278	0.209875	3.71316	0.718104	0.995181	1.09692	0.663807	1.81264	0.812719	0.995167	1.09452	0.529811	2.26113	0.76812	0.995015	1.11638	0.548836	2.27081
Kurilshikov et al.(MiBioGen)	Cluster headache, strict, including avohilmo（FinnGen Biobank）	genus	5genus.Dialister.id.2183	11	0.552326	0.964292	1.1195	0.7715	1.62448	0.548025	0.967379	1.42341	0.469704	4.31358	0.624897	0.995181	1.1326	0.687529	1.86579	0.713322	0.995167	1.17405	0.510927	2.69783	0.750467	0.995015	1.14113	0.517127	2.51809
Kurilshikov et al.(MiBioGen)	Cluster headache, strict, including avohilmo（FinnGen Biobank）	genus	5genus.Dorea.id.1997	12	0.619185	0.976683	1.11889	0.718434	1.74256	0.757113	0.967379	1.37653	0.191894	9.87436	0.87938	0.995181	0.958035	0.550695	1.66668	0.696612	0.995167	0.820902	0.312331	2.15758	0.708625	0.995015	0.829556	0.319248	2.15558
Kurilshikov et al.(MiBioGen)	Cluster headache, strict, including avohilmo（FinnGen Biobank）	genus	5genus.Eggerthella.id.819	12	0.732749	0.976683	1.08881	0.668123	1.77438	0.896805	0.967379	0.907521	0.21725	3.79099	0.383767	0.995181	1.31372	0.710935	2.4276	0.64408	0.995167	1.27611	0.466614	3.48995	0.592026	0.995015	1.27611	0.536868	3.03326
Kurilshikov et al.(MiBioGen)	Cluster headache, strict, including avohilmo（FinnGen Biobank）	genus	5genus.Eisenbergiella.id.11304	9	0.127565	0.840924	1.28771	0.930167	1.7827	0.708742	0.967379	0.742264	0.16542	3.33066	0.594082	0.995181	1.11642	0.744603	1.67391	0.95956	0.995167	1.01888	0.505518	2.05358	0.986216	0.996383	1.0059	0.52705	1.91979
Kurilshikov et al.(MiBioGen)	Cluster headache, strict, including avohilmo（FinnGen Biobank）	genus	5genus.Enterorhabdus.id.820	12	0.426045	0.956417	0.886408	0.658701	1.19283	0.299248	0.967379	0.294149	0.0329007	2.62985	0.445032	0.995181	0.863981	0.593676	1.25736	0.354224	0.995167	0.713181	0.359515	1.41476	0.358577	0.995015	0.732489	0.387467	1.38474
Kurilshikov et al.(MiBioGen)	Cluster headache, strict, including avohilmo（FinnGen Biobank）	genus	5genus.Erysipelatoclostridium.id	9	0.94092	0.979364	1.01368	0.707704	1.45194	0.621767	0.967379	0.758193	0.264914	2.16998	0.860177	0.995181	1.04318	0.651724	1.66977	0.960796	0.995167	1.01784	0.513835	2.01623	0.797426	0.995015	1.08832	0.582479	2.03346
Kurilshikov et al.(MiBioGen)	Cluster headache, strict, including avohilmo（FinnGen Biobank）	genus	5genus.ErysipelotrichaceaeUCG003	16	0.740717	0.976683	1.05768	0.758737	1.47442	0.843446	0.967379	0.868091	0.218804	3.44409	0.799995	0.995181	1.05911	0.6792	1.65152	0.911754	0.995167	1.04721	0.469532	2.33561	0.897162	0.995015	1.05557	0.471311	2.36409
Kurilshikov et al.(MiBioGen)	Cluster headache, strict, including avohilmo（FinnGen Biobank）	genus	5genus.Escherichia.Shigella.id.3	17	0.150379	0.840924	0.769241	0.538005	1.09986	0.367321	0.967379	0.624615	0.231554	1.68489	0.381121	0.995181	0.802681	0.49082	1.31269	0.835682	0.995167	0.918029	0.414523	2.03313	0.887105	0.995015	0.940079	0.406006	2.17669
Kurilshikov et al.(MiBioGen)	Cluster headache, strict, including avohilmo（FinnGen Biobank）	genus	5genus.Faecalibacterium.id.2057	15	0.717385	0.976683	1.06945	0.743462	1.53837	0.400717	0.967379	0.609072	0.199013	1.86405	0.714615	0.995181	1.09509	0.672981	1.78194	0.965873	0.995167	1.01741	0.468003	2.21177	0.86045	0.995015	1.07808	0.47346	2.45479
Kurilshikov et al.(MiBioGen)	Cluster headache, strict, including avohilmo（FinnGen Biobank）	genus	5genus.Flavonifractor.id.2059	13	0.862171	0.979364	1.03997	0.668111	1.61881	0.308467	0.967379	0.620787	0.258758	1.48933	0.373283	0.995181	0.790647	0.471413	1.32606	0.475225	0.995167	1.41548	0.561881	3.56583	0.430384	0.995015	0.764543	0.401189	1.45699
Kurilshikov et al.(MiBioGen)	Cluster headache, strict, including avohilmo（FinnGen Biobank）	genus	5genus.Fusicatenibacter.id.11305	8	0.752384	0.976683	0.906759	0.493643	1.6656	0.15763	0.967379	4.9039	0.711255	33.8109	0.994796	0.995181	1.00211	0.531178	1.89058	0.957397	0.995167	0.970282	0.333458	2.82329	0.954963	0.995015	0.970282	0.353296	2.66475
Kurilshikov et al.(MiBioGen)	Cluster headache, strict, including avohilmo（FinnGen Biobank）	genus	5genus.Gordonibacter.id.821	19	0.242972	0.840924	0.794097	0.539254	1.16937	0.207294	0.967379	2.61853	0.620926	11.0427	0.668541	0.995181	0.891003	0.525335	1.5112	0.923069	0.995167	0.949553	0.336969	2.67577	0.965456	0.995015	1.0216	0.393541	2.65201
Kurilshikov et al.(MiBioGen)	Cluster headache, strict, including avohilmo（FinnGen Biobank）	genus	5genus.Haemophilus.id.3698	14	0.482934	0.957082	0.929647	0.758245	1.13979	0.845763	0.967379	0.92197	0.413828	2.05406	0.30508	0.995181	0.866822	0.659643	1.13907	0.34725	0.995167	0.787544	0.487312	1.27275	0.460408	0.995015	0.817722	0.486889	1.37335
Kurilshikov et al.(MiBioGen)	Cluster headache, strict, including avohilmo（FinnGen Biobank）	genus	5genus.Holdemanella.id.11393	14	0.851516	0.979364	0.964324	0.659206	1.41067	0.870327	0.967379	1.08571	0.41302	2.85403	0.538228	0.995181	0.869918	0.558151	1.35583	0.468206	0.995167	0.714013	0.295116	1.72751	0.371777	0.995015	0.681289	0.302138	1.53623
Kurilshikov et al.(MiBioGen)	Cluster headache, strict, including avohilmo（FinnGen Biobank）	genus	5genus.Holdemania.id.2157	14	0.961108	0.979364	1.00672	0.769063	1.31782	0.333383	0.967379	0.645723	0.275844	1.51157	0.404783	0.995181	0.855779	0.593244	1.2345	0.515513	0.995167	0.812819	0.44269	1.49241	0.43714	0.995015	0.78117	0.427097	1.42878
Kurilshikov et al.(MiBioGen)	Cluster headache, strict, including avohilmo（FinnGen Biobank）	genus	5genus.Howardella.id.2000	17	0.727032	0.976683	1.0675	0.739749	1.54047	0.0848138	0.967379	0.401251	0.152126	1.05835	0.482376	0.995181	0.861409	0.568116	1.30611	0.440851	0.995167	0.753524	0.373533	1.52007	0.487259	0.995015	0.791031	0.414559	1.50939
Kurilshikov et al.(MiBioGen)	Cluster headache, strict, including avohilmo（FinnGen Biobank）	genus	5genus.Hungatella.id.11306	10	0.44893	0.956417	0.913143	0.721762	1.15527	0.371962	0.967379	0.629308	0.241002	1.64326	0.643231	0.995181	0.931352	0.689315	1.25838	0.958556	0.995167	0.987885	0.631711	1.54488	0.778873	0.995015	0.940664	0.621556	1.4236
Kurilshikov et al.(MiBioGen)	Cluster headache, strict, including avohilmo（FinnGen Biobank）	genus	5genus.Intestinibacter.id.11345	5	0.0795492	0.840924	0.718144	0.495989	1.0398	0.738253	0.967379	0.657235	0.0696882	6.19844	0.207361	0.995181	0.735392	0.456061	1.18581	0.469442	0.995167	0.783962	0.431266	1.4251	0.429451	0.995015	0.777768	0.443842	1.36292
Kurilshikov et al.(MiBioGen)	Cluster headache, strict, including avohilmo（FinnGen Biobank）	genus	5genus.Intestinimonas.id.2062	15	0.747447	0.976683	0.943884	0.66413	1.34148	0.0919179	0.967379	0.345843	0.110199	1.08538	0.342762	0.995181	0.795841	0.496524	1.2756	0.389742	0.995167	0.686814	0.299608	1.57444	0.306542	0.995015	0.669279	0.318805	1.40504
Kurilshikov et al.(MiBioGen)	Cluster headache, strict, including avohilmo（FinnGen Biobank）	genus	5genus.Lachnoclostridium.id.1130	19	0.282453	0.840924	0.83243	0.595797	1.16305	0.642147	0.967379	1.25598	0.488568	3.22878	0.750621	0.995181	1.07942	0.673761	1.72932	0.575696	0.995167	1.33059	0.498355	3.55262	0.561688	0.995015	1.24546	0.601625	2.5783
Kurilshikov et al.(MiBioGen)	Cluster headache, strict, including avohilmo（FinnGen Biobank）	genus	5genus.Lachnospira.id.2004	15	0.285082	0.840924	1.25909	0.825274	1.92096	0.582049	0.967379	1.51825	0.356168	6.47193	0.259335	0.995181	1.40278	0.779067	2.52582	0.475671	0.995167	1.48805	0.514078	4.30732	0.400064	0.995015	1.53446	0.583479	4.03537
Kurilshikov et al.(MiBioGen)	Cluster headache, strict, including avohilmo（FinnGen Biobank）	genus	5genus.LachnospiraceaeFCS020grou	7	0.25387	0.840924	0.691063	0.366304	1.30375	0.262557	0.967379	9.26083	0.292119	293.589	0.991707	0.995181	1.00459	0.423974	2.38032	0.77739	0.995167	1.22132	0.324625	4.59494	0.759629	0.995015	1.22132	0.359276	4.15178
Kurilshikov et al.(MiBioGen)	Cluster headache, strict, including avohilmo（FinnGen Biobank）	genus	5genus.LachnospiraceaeNC2004grou	16	0.271337	0.840924	0.821705	0.579101	1.16594	0.594796	0.967379	1.29759	0.507853	3.31541	0.529874	0.995181	0.863041	0.545064	1.36652	0.848423	0.995167	0.927615	0.434975	1.97821	0.887963	0.995015	0.950833	0.47711	1.89492
Kurilshikov et al.(MiBioGen)	Cluster headache, strict, including avohilmo（FinnGen Biobank）	genus	5genus.LachnospiraceaeND3007grou	10	0.75953	0.976683	1.05091	0.764693	1.44424	0.884134	0.967379	0.903124	0.239464	3.40608	0.512736	0.995181	1.14392	0.764789	1.71101	0.642727	0.995167	1.15955	0.633479	2.12251	0.623445	0.995015	1.17499	0.630963	2.18808
Kurilshikov et al.(MiBioGen)	Cluster headache, strict, including avohilmo（FinnGen Biobank）	genus	5genus.LachnospiraceaeNK4A136gro	3	0.291749	0.840924	0.519229	0.15353	1.756	0.657648	0.967379	0.000431052	3.7517e-15	4.95259e+07	0.123179	0.995181	0.368238	0.103392	1.3115	0.283934	0.995167	0.274134	0.0477128	1.57503	0.314793	0.995015	0.272012	0.0399602	1.8516
Kurilshikov et al.(MiBioGen)	Cluster headache, strict, including avohilmo（FinnGen Biobank）	genus	5genus.LachnospiraceaeUCG001.id.	16	0.251056	0.840924	0.814961	0.574634	1.1558	0.376018	0.967379	0.715077	0.348449	1.46746	0.659704	0.995181	0.886968	0.520034	1.51281	0.725309	0.995167	0.868794	0.402275	1.87633	0.673033	0.995015	0.878851	0.488093	1.58244
Kurilshikov et al.(MiBioGen)	Cluster headache, strict, including avohilmo（FinnGen Biobank）	genus	5genus.LachnospiraceaeUCG004.id.	16	0.3228	0.866041	1.21146	0.828245	1.77199	0.623648	0.967379	1.57065	0.269225	9.16307	0.104272	0.995181	1.43712	0.927838	2.22594	0.19789	0.995167	1.6556	0.795103	3.44738	0.197729	0.995015	1.59415	0.809108	3.14087
[truncated: 244 more rows]

## Sheet: ST9
Supplementary table 9 Casual effects of MR Analysis between gut microbiota and Ocular pain（FDR）
[truncated: 198 more rows]

[truncated: 10 more sheets: ST10, ST11, ST12, ST13, ST14, ST15, ST16, ST17, ST18, ST19]
